# Supplementary material for: Overexpression of α (1,6) fucosyltransferase in the development of castration-resistant prostate cancer cells
Source: PubMed Central journal article supplement (PMC5895601; doi:10.1038/s41391-017-0016-7), 2018-01-16
Supplement: 41391_2017_16_MOESM3_ESM.pdf [file 41391_2017_16_MOESM3_ESM.pdf]

| Accession | Description                                                                              | # Peptides | # PSMs | Biological Process                              | 115/114 | 116/114 | 117/114 |
|-----------|------------------------------------------------------------------------------------------|------------|--------|-------------------------------------------------|---------|---------|---------|
| 664806    | cold-inducible RNA-binding protein isoform 2 [Homo sapiens]                              | 2          | 8      | cell organization and biogenesis                | 1.013   | 16.020  | 11.638  |
| 530393    | PREDICTED: actin-binding LIM protein 1 isoform X15 [Homo sapiens]                        | 3          | 9      | regulation of biological process                | 0.892   | 15.387  | 12.645  |
| 119613    | hCG17415, isoform CRA_b, partial [Homo sapiens]                                          | 2          | 4      |                                                 | 0.889   | 14.952  | 13.029  |
| 119570    | PDZ and LIM domain 1 (elfin), isoform CRA_c [Homo sapiens]                               | 2          | 9      | regulation of biological process                | 0.907   | 14.758  | 27.020  |
| 410444    | LIM and SH3 domain protein 1 isoform b [Homo sapiens]                                    | 2          | 8      | regulation of biological process                | 0.934   | 10.701  | 9.226   |
| 291327    | oxysterol-binding protein-related protein 10 isoform 2 [Homo sapiens]                    | 3          | 6      | metabolic process; transport                    | 0.991   | 10.660  | 9.344   |
| 318078    | ZNF326 protein, partial [Homo sapiens]                                                   | 5          | 12     | regulation of biological process                | 0.928   | 8.596   | 6.759   |
| 180273    | unknown [Homo sapiens]                                                                   | 2          | 3      | cellular process; response to stimulus          | 0.798   | 8.432   | 6.791   |
| 116283    | CALD1 protein, partial [Homo sapiens]                                                    | 2          | 4      | cellular component movement                     | 0.904   | 8.316   | 6.394   |
| 119589    | complement component 3, isoform CRA_a [Homo sapiens]                                     | 2          | 4      | response to stimulus; coagulation               | 0.973   | 8.227   | 8.099   |
| 140424    | unnamed protein product [Homo sapiens]                                                   | 2          | 4      | cell organization and biogenesis                | 1.034   | 8.040   | 6.150   |
| 119594    | RNA binding motif protein 14, isoform CRA_a [Homo sapiens]                               | 16         | 86     | cell organization and biogenesis                | 0.967   | 8.024   | 7.159   |
| 119618    | ataxin 2, isoform CRA_b [Homo sapiens]                                                   | 4          | 7      | cellular process; transport                     | 0.856   | 7.980   | 5.128   |
| 170283    | Similar to gelsolin (amyloidosis, Finnish type), partial [Homo sapiens]                  | 2          | 4      | response to stimulus; metabolic process         | 0.882   | 7.466   | 6.361   |
| 224053    | macroglobulin alpha2                                                                     | 4          | 9      |                                                 | 0.855   | 7.295   | 7.380   |
| 158256    | unnamed protein product [Homo sapiens]                                                   | 7          | 15     | biological process; metabolic process           | 0.923   | 7.284   | 6.612   |
| 767908    | PREDICTED: regulation of nuclear pre-mRNA domain-containing protein 1 [Homo sapiens]     | 4          | 8      |                                                 | 0.813   | 7.088   | 6.539   |
| 28590     | unnamed protein product [Homo sapiens]                                                   | 5          | 27     | regulation of biological process                | 0.995   | 6.664   | 6.852   |
| 768016    | PREDICTED: protein LSM14 homolog B isoform X11 [Homo sapiens]                            | 2          | 5      | biological process; development                 | 0.792   | 6.662   | 5.836   |
| 119612    | N-myc downstream regulated gene 1, isoform CRA_a [Homo sapiens]                          | 4          | 26     | cell organization and biogenesis                | 0.890   | 6.655   | 5.029   |
| 574721    | NFkB interacting protein 1 [Homo sapiens]                                                | 4          | 11     | cellular process; metabolic process; cell death | 0.920   | 6.583   | 5.280   |
| 864510    | UDP-glucuronosyltransferase 1 family polypeptide A8s, partial [Homo sapiens]             | 2          | 5      | regulation of biological process                | 0.857   | 6.582   | 5.680   |
| 828027    | RBM1, partial [Homo sapiens]                                                             | 7          | 49     | metabolic process                               | 1.029   | 6.442   | 6.509   |
| 119600    | potassium channel tetramerisation domain containing 12 [Homo sapiens]                    | 5          | 7      | cell organization and biogenesis                | 1.053   | 6.368   | 6.202   |
| 156801    | Similar to breast cancer anti-estrogen resistance 1, partial [Homo sapiens]              | 2          | 3      | cellular component movement; cell division      | 1.051   | 6.291   | 5.531   |
| 217553    | unnamed protein product [Homo sapiens]                                                   | 9          | 65     | biogenesis; response to stimulus                | 0.987   | 6.227   | 6.416   |
| 119626    | albumin, isoform CRA_k [Homo sapiens]                                                    | 5          | 42     | regulation of biological process                | 0.869   | 6.186   | 7.135   |
| 119605    | splicing factor, arginine/serine-rich 14, isoform CRA_b [Homo sapiens]                   | 3          | 7      | metabolic process                               | 0.844   | 6.156   | 5.600   |
| 702047    | unnamed protein product, partial [Homo sapiens]                                          | 2          | 4      | metabolic process                               | 0.917   | 5.832   | 4.671   |
| 145386    | phostensin [Homo sapiens]                                                                | 2          | 3      |                                                 | 0.831   | 5.781   | 4.966   |
| 347582    | charged multivesicular body protein 2b isoform 2 [Homo sapiens]                          | 2          | 3      | cellular process; cellular homeostasis          | 0.814   | 5.552   | 4.692   |
| 157829    | Chain A, Crystal Structure Of Human Annexin I At 2.5 Angstroms Resolution [Homo sapiens] | 4          | 18     |                                                 | 0.941   | 5.551   | 6.560   |
| 451994    | nuclear receptor co-repressor, partial [Homo sapiens]                                    | 3          | 5      |                                                 | 0.910   | 5.160   | 3.835   |

|        |                                                                    |   |    |                                      |       |       |       |
|--------|--------------------------------------------------------------------|---|----|--------------------------------------|-------|-------|-------|
| 488436 | hypothetical protein, partial [Homo sapiens]                       | 2 | 5  |                                      | 1.100 | 5.060 | 4.691 |
| 109255 | centrosomal protein of 170 kDa isoform gamma [Homo sapiens]        | 4 | 7  |                                      | 0.983 | 4.949 | 4.706 |
| 827343 | Chain A, Crystal Structure Of Cerebral Cavernous Malformation 2 C  | 2 | 3  |                                      | 0.764 | 4.844 | 4.220 |
| 221041 | unnamed protein product [Homo sapiens]                             | 7 | 18 | biogenesis; response to stimulus     | 0.878 | 4.831 | 4.336 |
| 768004 | PREDICTED: cytokine receptor-like factor 1 isoform X3 [Homo sap    | 2 | 8  | regulation of biological process     | 1.438 | 4.789 | 5.690 |
| 119573 | ubiquilin 4, isoform CRA_a [Homo sapiens]                          | 4 | 28 | regulation of biological process     | 0.984 | 4.683 | 3.888 |
| 865568 | hypothetical protein, partial [Homo sapiens]                       | 2 | 3  | cell organization and biogenesis     | 0.942 | 4.676 | 4.246 |
| 767972 | PREDICTED: pregnancy zone protein isoform X4 [Homo sapiens]        | 2 | 4  | regulation of biological process     | 0.894 | 4.668 | 4.587 |
| 119573 | KIAA0907, isoform CRA_b [Homo sapiens]                             | 2 | 4  |                                      | 0.826 | 4.657 | 4.120 |
| 147902 | RNA-binding protein MEX3A [Homo sapiens]                           | 2 | 2  |                                      | 0.799 | 4.647 | 4.661 |
| 119631 | myosin IB, isoform CRA_d [Homo sapiens]                            | 2 | 5  | s; cellular component movement       | 0.920 | 4.613 | 4.553 |
| 749197 | Chain B, Structure Of Paxx                                         | 2 | 6  |                                      | 1.052 | 4.575 | 4.166 |
| 633005 | KIAA1150 protein, partial [Homo sapiens]                           | 6 | 17 | cell organization and biogenesis     | 0.837 | 4.556 | 3.628 |
| 194387 | unnamed protein product [Homo sapiens]                             | 2 | 3  | metabolic process                    | 0.905 | 4.467 | 3.699 |
| 316572 | PREX1 protein, partial [Homo sapiens]                              | 2 | 5  | n; cellular component movement       | 0.887 | 4.449 | 4.321 |
| 194382 | unnamed protein product [Homo sapiens]                             | 2 | 3  | cell death                           | 0.869 | 4.424 | 3.486 |
| 119608 | euchromatic histone-lysine N-methyltransferase 1, isoform CRA_b    | 3 | 7  | cell organization and biogenesis     | 0.833 | 4.321 | 3.752 |
| 566755 | unnamed protein product, partial [Homo sapiens]                    | 3 | 10 |                                      | 1.041 | 4.224 | 3.865 |
| 194374 | unnamed protein product [Homo sapiens]                             | 6 | 25 | al process; response to stimulus     | 0.785 | 4.216 | 3.324 |
| 338718 | C9orf75 protein, partial [Homo sapiens]                            | 2 | 3  |                                      | 0.763 | 4.213 | 3.552 |
| 767974 | PREDICTED: CCR4-NOT transcription complex subunit 2 isoform X      | 2 | 4  | abolic process; cell differentiation | 0.912 | 4.194 | 3.526 |
| 390608 | baculoviral IAP repeat-containing protein 2 isoform 2 [Homo sapie  | 2 | 3  | nd biogenesis; defense response      | 0.914 | 4.176 | 3.946 |
| 386642 | membrane-associated tyrosine- and threonine-specific cdc2-inhibi   | 2 | 3  | cell organization and biogenesis     | 1.066 | 4.167 | 3.594 |
| 455034 | unnamed protein product [Homo sapiens]                             | 2 | 3  |                                      | 0.761 | 4.160 | 3.540 |
| 119590 | exocyst complex component 8 [Homo sapiens]                         | 4 | 11 | sis; transport; metabolic process    | 0.811 | 4.150 | 3.638 |
| 119583 | ubiquilin 1, isoform CRA_d [Homo sapiens]                          | 5 | 30 | to stimulus; cell communication      | 0.932 | 4.072 | 3.364 |
| 104370 | unnamed protein product [Homo sapiens]                             | 2 | 3  |                                      | 1.071 | 4.014 | 3.567 |
| 683688 | MHC class I antigen, partial [Homo sapiens]                        | 3 | 5  | e response; response to stimulus     | 1.124 | 3.943 | 3.687 |
| 578826 | PREDICTED: sphingosine-1-phosphate phosphatase 1 isoform X1        | 2 | 3  | al process; response to stimulus     | 0.846 | 3.929 | 3.644 |
| 108638 | U4/U6.U5 tri-snRNP-associated protein 1 [Homo sapiens]             | 9 | 24 | al process; response to stimulus     | 0.957 | 3.924 | 3.599 |
| 622024 | CIP29 protein [Homo sapiens]                                       | 3 | 11 | n of biological process; transport   | 0.822 | 3.919 | 3.792 |
| 119596 | bin3, bicoid-interacting 3, homolog (Drosophila), isoform CRA_b [I | 4 | 10 | logical process; metabolic process   | 1.011 | 3.872 | 3.802 |
| 400469 | unnamed protein product [Homo sapiens]                             | 3 | 12 |                                      | 1.079 | 3.843 | 3.514 |
| 119604 | A kinase (PRKA) anchor protein 8 [Homo sapiens]                    | 2 | 4  | al process; response to stimulus     | 0.853 | 3.836 | 3.425 |
| 193788 | unnamed protein product [Homo sapiens]                             | 3 | 7  | cell organization and biogenesis     | 0.874 | 3.833 | 3.338 |
| 221039 | unnamed protein product [Homo sapiens]                             | 2 | 3  | gical process; cell differentiation  | 0.870 | 3.773 | 3.472 |
| 194378 | unnamed protein product [Homo sapiens]                             | 2 | 10 | ent movement; defense response       | 0.947 | 3.759 | 4.019 |
| 194382 | unnamed protein product [Homo sapiens]                             | 2 | 3  | metabolic process                    | 0.787 | 3.650 | 3.694 |
| 194376 | unnamed protein product [Homo sapiens]                             | 3 | 8  |                                      | 1.140 | 3.641 | 3.611 |
| 194375 | unnamed protein product, partial [Homo sapiens]                    | 2 | 2  | of biological process; cell death    | 1.119 | 3.593 | 3.476 |

|        |                                                                    |    |    |                                       |       |       |       |
|--------|--------------------------------------------------------------------|----|----|---------------------------------------|-------|-------|-------|
| 119608 | argininosuccinate synthetase, isoform CRA_c [Homo sapiens]         | 5  | 10 | regulation of biological process      | 0.990 | 3.588 | 2.910 |
| 526262 | hypothetical protein, partial [Homo sapiens]                       | 9  | 20 | to stimulus; cell communication       | 0.936 | 3.568 | 3.363 |
| 119631 | plakophilin 4, isoform CRA_g [Homo sapiens]                        | 11 | 25 | regulation of biological process      | 0.942 | 3.566 | 3.402 |
| 194373 | unnamed protein product [Homo sapiens]                             | 6  | 20 | metabolic process                     | 0.923 | 3.558 | 3.299 |
| 119587 | myeloid/lymphoid or mixed-lineage leukemia (trithorax homolog, D   | 3  | 4  | zation and biogenesis; cell death     | 0.823 | 3.542 | 3.068 |
| 580316 | protein transport protein Sec61 subunit beta [Homo sapiens]        | 3  | 15 | al process; response to stimulus      | 1.134 | 3.541 | 2.677 |
| 119618 | TRAF-type zinc finger domain containing 1, isoform CRA_a [Homo     | 3  | 7  | ; regulation of biological process    | 0.949 | 3.540 | 3.465 |
| 170463 | SON DNA binding protein isoform A [Homo sapiens]                   | 7  | 35 | ; regulation of biological process    | 1.038 | 3.492 | 2.760 |
| 201984 | 182kDa tankyrase1-binding protein [Homo sapiens]                   | 7  | 17 | cell organization and biogenesis      | 0.898 | 3.451 | 3.218 |
| 194386 | unnamed protein product, partial [Homo sapiens]                    | 4  | 10 | nd biogenesis; cell differentiation   | 0.807 | 3.444 | 3.005 |
| 119595 | RAD9 homolog A (S. pombe), isoform CRA_a [Homo sapiens]            | 2  | 3  | ; regulation of biological process    | 0.966 | 3.443 | 3.311 |
| 119594 | copper chaperone for superoxide dismutase, isoform CRA_b [Hom      | 2  | 5  | ; regulation of biological process    | 1.018 | 3.419 | 3.285 |
| 578812 | PREDICTED: cell division cycle 5-like protein isoform X1 [Homo sa  | 3  | 10 | ; regulation of biological process    | 1.117 | 3.409 | 3.092 |
| 347835 | SRA1 protein, partial [Homo sapiens]                               | 2  | 5  | l proliferation; cell differentiation | 0.916 | 3.402 | 3.264 |
| 767999 | PREDICTED: lisH domain and HEAT repeat-containing protein KIA      | 3  | 6  |                                       | 0.959 | 3.359 | 3.726 |
| 119601 | hCG2028654 [Homo sapiens]                                          | 2  | 4  | metabolic process                     | 0.854 | 3.332 | 3.139 |
| 194380 | unnamed protein product [Homo sapiens]                             | 5  | 35 | of biological process; cell growth    | 0.984 | 3.264 | 3.440 |
| 154265 | ADD1 protein [Homo sapiens]                                        | 3  | 9  | ; response to stimulus; transport     | 1.186 | 3.249 | 3.290 |
| 119629 | chromosome 21 open reading frame 70, isoform CRA_f, partial [Ho    | 2  | 4  |                                       | 0.985 | 3.246 | 3.032 |
| 221039 | unnamed protein product [Homo sapiens]                             | 9  | 23 | al process; response to stimulus      | 0.886 | 3.241 | 3.291 |
| 118572 | serine/arginine repetitive matrix protein 2 [Homo sapiens]         | 20 | 82 | metabolic process                     | 0.901 | 3.238 | 2.639 |
| 119569 | TruB pseudouridine (psi) synthase homolog 1 (E. coli) [Homo sapi   | 2  | 4  | metabolic process                     | 1.018 | 3.225 | 2.670 |
| 119590 | microtubule-associated protein 2, isoform CRA_d [Homo sapiens]     | 2  | 6  | biogenesis; response to stimulus      | 0.847 | 3.223 | 3.204 |
| 209874 | PHRF1 protein, partial [Homo sapiens]                              | 3  | 8  | metabolic process                     | 0.877 | 3.186 | 2.921 |
| 119579 | PC4 and SFRS1 interacting protein 1, isoform CRA_c [Homo sapie     | 5  | 12 | al process; response to stimulus      | 0.854 | 3.183 | 2.973 |
| 116812 | putative RNA-binding protein Luc7-like 2 isoform 1 [Homo sapiens]  | 5  | 29 | cell organization and biogenesis      | 0.864 | 3.181 | 2.415 |
| 767974 | PREDICTED: protein phosphatase 1 regulatory subunit 12A isoform    | 5  | 12 | al process; response to stimulus      | 0.869 | 3.143 | 2.942 |
| 119594 | glycine-N-acyltransferase-like 2, isoform CRA_a [Homo sapiens]     | 2  | 3  | metabolic process                     | 0.838 | 3.142 | 3.049 |
| 119611 | BAT2 domain containing 1, isoform CRA_a [Homo sapiens]             | 3  | 6  | cell differentiation                  | 0.846 | 3.121 | 2.865 |
| 564748 | myocyte enhancer factor 2D/deleted in azoospermia associated pr    | 4  | 11 | ; regulation of biological process    | 0.945 | 3.120 | 2.573 |
| 122919 | Chain X, Crystal Structure Of Human Alpha 1,6-fucosyltransferase,  | 8  | 18 |                                       | 0.949 | 3.041 | 3.047 |
| 865562 | hypothetical protein, partial [Homo sapiens]                       | 2  | 3  | ; regulation of biological process    | 0.956 | 3.019 | 2.734 |
| 289520 | ataxin 3 variant ao, partial [Homo sapiens]                        | 2  | 3  | cal process; cell communication       | 0.867 | 3.008 | 2.423 |
| 767981 | PREDICTED: YLP motif-containing protein 1 isoform X2 [Homo sa      | 6  | 18 | gical process; metabolic process      | 0.836 | 2.992 | 2.779 |
| 667315 | hemoglobin beta chain, partial [Homo sapiens]                      | 2  | 6  | cell organization and biogenesis      | 0.848 | 2.984 | 2.854 |
| 767941 | PREDICTED: nuclear pore complex protein Nup153 isoform X3 [Ho      | 4  | 7  | al process; response to stimulus      | 0.808 | 2.980 | 2.931 |
| 119597 | dUTP pyrophosphatase, isoform CRA_c [Homo sapiens]                 | 4  | 11 | metabolic process                     | 0.907 | 2.979 | 2.656 |
| 476787 | TST [Homo sapiens]                                                 | 2  | 5  | ess; cell differentiation; transport  | 1.058 | 2.957 | 2.983 |
| 767943 | PREDICTED: ralBP1-associated Eps domain-containing protein 1 i     | 2  | 3  |                                       | 0.884 | 2.948 | 2.281 |
| 119624 | ral guanine nucleotide dissociation stimulator-like 2, isoform CRA | 2  | 6  | al process; response to stimulus      | 0.819 | 2.940 | 2.502 |

|        |                                                                   |    |     |                                    |       |       |       |
|--------|-------------------------------------------------------------------|----|-----|------------------------------------|-------|-------|-------|
| 189055 | unnamed protein product [Homo sapiens]                            | 3  | 7   | metabolic process                  | 0.988 | 2.916 | 2.629 |
| 189053 | unnamed protein product [Homo sapiens]                            | 4  | 34  | sis; metabolic process; transport  | 1.077 | 2.906 | 3.290 |
| 525317 | MUC5AC, partial [Homo sapiens]                                    | 4  | 6   | al process; response to stimulus   | 0.940 | 2.881 | 3.286 |
| 331508 | Ser/Arg-related nuclear matrix protein [Homo sapiens]             | 2  | 16  | metabolic process; transport       | 0.898 | 2.874 | 3.530 |
| 119577 | interferon regulatory factor 2 binding protein 1 [Homo sapiens]   | 5  | 13  | ; regulation of biological process | 0.897 | 2.868 | 2.008 |
| 767908 | PREDICTED: lysine-specific demethylase 5B isoform X2 [Homo sa     | 2  | 3   | ; regulation of biological process | 0.977 | 2.859 | 2.372 |
| 119588 | hCG1990378, isoform CRA_a [Homo sapiens]                          | 11 | 31  | metabolic process                  | 1.058 | 2.852 | 2.719 |
| 312434 | histone acetyltransferase KAT7 isoform 4 [Homo sapiens]           | 2  | 4   | ; regulation of biological process | 0.863 | 2.849 | 2.227 |
| 189055 | unnamed protein product [Homo sapiens]                            | 3  | 33  | regulation of biological process   | 0.970 | 2.832 | 2.684 |
| 119590 | Williams-Beuren syndrome chromosome region 1, isoform CRA_a       | 4  | 21  | biological process; reproduction   | 1.044 | 2.831 | 2.839 |
| 396445 | PUM2 protein, partial [Homo sapiens]                              | 2  | 4   | cell organization and biogenesis   | 0.777 | 2.830 | 2.450 |
| 119593 | emerin (Emery-Dreifuss muscular dystrophy), isoform CRA_a [Homo   | 6  | 46  | erentiation; response to stimulus  | 0.844 | 2.822 | 2.531 |
| 413500 | unknown [Homo sapiens]                                            | 2  | 4   | ; regulation of biological process | 0.901 | 2.800 | 2.442 |
| 187609 | truncated plakophilin-2 [Homo sapiens]                            | 6  | 10  | cal process; cell communication    | 0.872 | 2.764 | 2.503 |
| 189055 | unnamed protein product [Homo sapiens]                            | 17 | 153 | transport                          | 1.071 | 2.749 | 2.992 |
| 189168 | KIAA1966 protein, partial [Homo sapiens]                          | 2  | 2   | cell organization and biogenesis   | 1.106 | 2.723 | 2.713 |
| 124504 | HLA-DQB1 protein, partial [Homo sapiens]                          | 2  | 4   | ; regulation of biological process | 0.748 | 2.713 | 2.705 |
| 111600 | ITGB4 protein [Homo sapiens]                                      | 9  | 19  | n; cellular component movement     | 0.857 | 2.713 | 2.452 |
| 345348 | unnamed protein product, partial [Homo sapiens]                   | 2  | 3   | ; regulation of biological process | 0.923 | 2.712 | 2.068 |
| 633012 | KIAA1157 protein, partial [Homo sapiens]                          | 3  | 14  | metabolic process                  | 0.918 | 2.707 | 2.375 |
| 341476 | AMP deaminase 2 isoform 2 [Homo sapiens]                          | 5  | 9   | metabolic process                  | 0.905 | 2.704 | 2.476 |
| 158260 | unnamed protein product [Homo sapiens]                            | 5  | 12  | e response; response to stimulus   | 1.034 | 2.701 | 1.896 |
| 194385 | unnamed protein product [Homo sapiens]                            | 4  | 16  | sponse to stimulus; development    | 0.884 | 2.700 | 2.198 |
| 303227 | matrin-3 isoform a [Homo sapiens]                                 | 15 | 135 | regulation of biological process   | 0.952 | 2.694 | 2.751 |
| 530406 | PREDICTED: transducin-like enhancer protein 3 isoform X14 [Homo   | 11 | 46  | al process; response to stimulus   | 0.987 | 2.689 | 2.468 |
| 767944 | PREDICTED: zinc finger protein 316 isoform X1 [Homo sapiens]      | 3  | 6   | ; regulation of biological process | 0.986 | 2.681 | 2.287 |
| 768004 | PREDICTED: scaffold attachment factor B2 isoform X1 [Homo sapi    | 10 | 17  | ; regulation of biological process | 0.949 | 2.671 | 2.868 |
| 119587 | conserved nuclear protein NHN1, isoform CRA_d, partial [Homo sa   | 2  | 6   |                                    | 1.049 | 2.670 | 2.368 |
| 194380 | unnamed protein product [Homo sapiens]                            | 3  | 10  | cell organization and biogenesis   | 0.842 | 2.659 | 2.449 |
| 733215 | TSC22 domain family protein 4 isoform a [Homo sapiens]            | 2  | 4   | sponse to stimulus; reproduction   | 0.861 | 2.620 | 2.393 |
| 201496 | EF-hand domain-containing protein D2 [Homo sapiens]               | 2  | 4   |                                    | 0.920 | 2.619 | 2.736 |
| 768045 | PREDICTED: TATA-binding protein-associated factor 2N isoform X    | 6  | 32  | regulation of biological process   | 0.927 | 2.612 | 2.694 |
| 194383 | unnamed protein product [Homo sapiens]                            | 4  | 8   | ; regulation of biological process | 0.940 | 2.598 | 2.373 |
| 119572 | nitric oxide synthase interacting protein, isoform CRA_a [Homo sa | 2  | 4   | ; regulation of biological process | 0.856 | 2.595 | 2.515 |
| 569671 | Chain B, Structure Of Human Annexin A2 In The Presence Of Calc    | 11 | 63  |                                    | 0.991 | 2.578 | 2.781 |
| 118137 | Chain B, Structure Of Activated G-alpha-i1 Bound To A Nucleotide  | 5  | 15  | al process; response to stimulus   | 0.984 | 2.572 | 2.239 |
| 119629 | DNA segment on chromosome 21 (unique) 2056 expressed sequer       | 4  | 10  | metabolic process                  | 0.746 | 2.569 | 2.410 |
| 525458 | hypothetical protein, partial [Homo sapiens]                      | 4  | 13  | of biological process; cell death  | 0.867 | 2.567 | 2.595 |
| 409777 | unnamed protein product, partial [Homo sapiens]                   | 2  | 3   |                                    | 0.995 | 2.565 | 2.632 |
| 193785 | unnamed protein product [Homo sapiens]                            | 2  | 3   |                                    | 1.202 | 2.564 | 2.680 |



|        |                                                                                  |    |     |                                          |       |       |       |
|--------|----------------------------------------------------------------------------------|----|-----|------------------------------------------|-------|-------|-------|
| 119579 | DEAH (Asp-Glu-Ala-His) box polypeptide 38, isoform CRA_f [Homo sapiens]          | 3  | 5   | metabolic process; transport             | 0.820 | 2.561 | 2.122 |
| 194382 | unnamed protein product [Homo sapiens]                                           | 7  | 41  | regulation of biological process         | 0.900 | 2.552 | 2.468 |
| 119618 | similar to splicing factor, arginine/serine-rich 4, isoform CRA_e [Homo sapiens] | 3  | 9   |                                          | 0.953 | 2.535 | 1.993 |
| 119586 | CTAGE family, member 5, isoform CRA_h [Homo sapiens]                             | 2  | 3   | cell organization and biogenesis         | 0.854 | 2.530 | 2.278 |
| 476784 | dJ1104E15.4 [Homo sapiens]                                                       | 2  | 7   |                                          | 0.845 | 2.518 | 2.204 |
| 767965 | PREDICTED: ribosomal RNA-processing protein 8 isoform X1 [Homo sapiens]          | 3  | 4   | communication; response to stimulus      | 0.984 | 2.510 | 2.062 |
| 767984 | PREDICTED: myelin expression factor 2 isoform X5 [Homo sapiens]                  | 7  | 21  | biological process; cell differentiation | 0.789 | 2.503 | 2.304 |
| 887492 | Chain c, Structure Of The Hcv Ires Bound To The Human Ribosome                   | 3  | 45  |                                          | 1.669 | 2.490 | 2.491 |
| 115528 | SLFN5 protein [Homo sapiens]                                                     | 5  | 10  | cell differentiation                     | 1.011 | 2.489 | 2.587 |
| 196049 | Chain D, Crystal Structure Of Human 3-Oxoacid Coa Transferase 1                  | 6  | 22  | metabolic process                        | 1.364 | 2.479 | 2.495 |
| 343648 | hypothetical protein, partial [Homo sapiens]                                     | 2  | 3   | cell biogenesis; defense response        | 0.889 | 2.473 | 2.204 |
| 119580 | target of myb1 (chicken), isoform CRA_d [Homo sapiens]                           | 3  | 7   | transport                                | 0.868 | 2.466 | 2.505 |
| 194378 | unnamed protein product [Homo sapiens]                                           | 5  | 16  |                                          | 0.898 | 2.465 | 2.103 |
| 119569 | adducin 3 (gamma), isoform CRA_b [Homo sapiens]                                  | 5  | 13  | response to stimulus; transport          | 1.089 | 2.463 | 2.297 |
| 194387 | unnamed protein product [Homo sapiens]                                           | 2  | 6   | regulation of biological process         | 0.945 | 2.458 | 2.677 |
| 578805 | PREDICTED: CLIP-associating protein 2 isoform X31 [Homo sapiens]                 | 9  | 16  | component movement; cell division        | 0.917 | 2.451 | 2.191 |
| 578805 | PREDICTED: CLIP-associating protein 2 isoform X22 [Homo sapiens]                 | 9  | 16  | component movement; cell division        | 0.858 | 2.451 | 2.191 |
| 767940 | PREDICTED: alanine--tRNA ligase, mitochondrial isoform X1 [Homo sapiens]         | 11 | 28  | cell organization and biogenesis         | 0.920 | 2.437 | 2.211 |
| 409777 | unnamed protein product, partial [Homo sapiens]                                  | 4  | 26  |                                          | 1.070 | 2.436 | 2.565 |
| 194386 | unnamed protein product [Homo sapiens]                                           | 2  | 6   | regulation of biological process         | 0.844 | 2.432 | 2.263 |
| 119603 | iduronidase, alpha-L-, isoform CRA_a [Homo sapiens]                              | 2  | 3   | cell biogenesis; metabolic process       | 0.783 | 2.429 | 2.312 |
| 530427 | PREDICTED: heterogeneous nuclear ribonucleoprotein M isoform                     | 25 | 196 | metabolic process                        | 0.925 | 2.413 | 1.967 |
| 119609 | chromobox homolog 8 (Pc class homolog, Drosophila) [Homo sapiens]                | 2  | 7   | biogenesis; response to stimulus         | 1.110 | 2.403 | 2.497 |
| 815890 | Golgi integral membrane protein 4 isoform 2 [Homo sapiens]                       | 3  | 9   | transport                                | 0.874 | 2.382 | 2.097 |
| 767912 | PREDICTED: TAF5-like RNA polymerase II p300/CBP-associated factor                | 2  | 3   | biological process; metabolic process    | 0.956 | 2.378 | 2.052 |
| 338733 | KHDRBS1 protein [Homo sapiens]                                                   | 4  | 36  | response to stimulus; cell proliferation | 0.952 | 2.377 | 2.286 |
| 479391 | YBX1 protein, partial [Homo sapiens]                                             | 5  | 53  | biological process; metabolic process    | 0.907 | 2.362 | 1.869 |
| 332703 | KIAA0611 protein, partial [Homo sapiens]                                         | 3  | 5   | cell organization and biogenesis         | 0.933 | 2.345 | 2.379 |
| 313530 | leucine rich neuronal protein [Homo sapiens]                                     | 4  | 7   |                                          | 1.010 | 2.343 | 2.077 |
| 194386 | unnamed protein product [Homo sapiens]                                           | 4  | 6   | cell organization and biogenesis         | 0.826 | 2.341 | 2.452 |
| 158255 | unnamed protein product [Homo sapiens]                                           | 2  | 6   | regulation of biological process         | 0.984 | 2.326 | 2.467 |
| 194389 | unnamed protein product [Homo sapiens]                                           | 7  | 53  | biological process; response to stimulus | 1.006 | 2.322 | 2.084 |
| 385122 | CLIP1 protein, partial [Homo sapiens]                                            | 2  | 4   | response to stimulus; transport          | 0.865 | 2.319 | 2.099 |
| 767983 | PREDICTED: ATP-dependent Clp protease ATP-binding subunit cl                     | 2  | 10  | regulation of biological process         | 0.968 | 2.318 | 2.424 |
| 194384 | unnamed protein product [Homo sapiens]                                           | 13 | 41  | biological process; response to stimulus | 0.925 | 2.306 | 2.287 |
| 155302 | PCNP protein [Homo sapiens]                                                      | 3  | 6   | metabolic process                        | 0.880 | 2.293 | 1.707 |
| 345334 | unnamed protein product [Homo sapiens]                                           | 3  | 4   | homeostasis; response to stimulus        | 0.978 | 2.292 | 2.694 |
| 530371 | PREDICTED: leucine-rich repeat flightless-interacting protein 1 iso              | 4  | 9   | response; response to stimulus           | 0.991 | 2.288 | 2.043 |
| 119572 | exosome component 6 [Homo sapiens]                                               | 2  | 7   | regulation of biological process         | 0.874 | 2.287 | 2.074 |
| 189065 | unnamed protein product [Homo sapiens]                                           | 2  | 3   | regulation of biological process         | 1.053 | 2.282 | 2.323 |

|         |                                                                        |    |     |                                      |       |       |       |
|---------|------------------------------------------------------------------------|----|-----|--------------------------------------|-------|-------|-------|
| 1195834 | hook homolog 3 (Drosophila), isoform CRA_a [Homo sapiens]              | 4  | 9   | regulation of biological process     | 0.998 | 2.267 | 2.089 |
| 1073264 | unknown [Homo sapiens]                                                 | 2  | 3   |                                      | 0.874 | 2.263 | 2.318 |
| 1655411 | unnamed protein product [Homo sapiens]                                 | 2  | 3   | regulation of biological process     | 0.903 | 2.257 | 2.016 |
| 1403571 | unnamed protein product [Homo sapiens]                                 | 3  | 11  |                                      | 1.052 | 2.255 | 1.776 |
| 1195741 | nudE nuclear distribution gene E homolog 1 (A. nidulans), isoform      | 5  | 9   | liferation; transport; cell division | 0.867 | 2.243 | 2.036 |
| 7680021 | PREDICTED: transcriptional repressor p66-alpha isoform X2 [Homo        | 3  | 8   | gical process; metabolic process     | 0.908 | 2.243 | 1.839 |
| 1196241 | kinesin light chain 4, isoform CRA_c [Homo sapiens]                    | 2  | 4   | metabolic process                    | 0.813 | 2.239 | 1.938 |
| 7679261 | PREDICTED: lipoma-preferred partner isoform X5 [Homo sapiens]          | 3  | 11  |                                      | 1.042 | 2.237 | 2.259 |
| 1404251 | unnamed protein product [Homo sapiens]                                 | 2  | 4   | esponse to stimulus; cell growth     | 1.130 | 2.219 | 1.992 |
| 5303841 | PREDICTED: heterogeneous nuclear ribonucleoproteins A2/B1 iso          | 17 | 478 | ss; metabolic process; transport     | 0.973 | 2.217 | 2.100 |
| 1195881 | hCG2043060, partial [Homo sapiens]                                     | 2  | 3   | metabolic process                    | 0.956 | 2.210 | 2.026 |
| 1195721 | ataxin 2-like, isoform CRA_b [Homo sapiens]                            | 5  | 12  | cell organization and biogenesis     | 0.919 | 2.193 | 2.242 |
| 1937861 | unnamed protein product [Homo sapiens]                                 | 2  | 4   |                                      | 1.071 | 2.191 | 2.360 |
| 4004321 | unnamed protein product, partial [Homo sapiens]                        | 6  | 30  |                                      | 1.170 | 2.184 | 1.983 |
| 1196221 | plakophilin 3, isoform CRA_b [Homo sapiens]                            | 19 | 108 | cell organization and biogenesis     | 1.004 | 2.174 | 1.980 |
| 6208751 | arginine/serine-rich splicing factor 6 variant, partial [Homo sapiens] | 9  | 53  | zation and biogenesis; transport     | 0.910 | 2.174 | 1.930 |
| 1196231 | HLA-B associated transcript 2, isoform CRA_d [Homo sapiens]            | 4  | 13  |                                      | 0.917 | 2.170 | 2.287 |
| 7679601 | PREDICTED: partitioning defective 3 homolog isoform X18 [Homo          | 7  | 16  | sponse to stimulus; cell division    | 0.877 | 2.167 | 1.973 |
| 3801411 | WD repeat domain 18 [Homo sapiens]                                     | 6  | 19  | development                          | 1.080 | 2.160 | 2.059 |
| 1196051 | drebrin 1, isoform CRA_c, partial [Homo sapiens]                       | 5  | 35  | logical process; cell proliferation  | 0.958 | 2.157 | 2.409 |
| 6728831 | Chain B, Structure Of The Human Sjogren Larsson Syndrome Enzy          | 7  | 26  |                                      | 1.086 | 2.134 | 2.115 |
| 1196161 | pleckstrin homology domain containing, family A member 5, isofo        | 4  | 6   |                                      | 0.971 | 2.134 | 2.151 |
| 3759461 | alpha-methyl-acyl-CoA racemase IIAs [Homo sapiens]                     | 5  | 26  | metabolic process                    | 0.907 | 2.130 | 2.005 |
| 1195951 | phosphatidylinositol transfer protein, membrane-associated 1, iso      | 6  | 13  | al process; response to stimulus     | 0.974 | 2.119 | 1.993 |
| 1195961 | translocase of outer mitochondrial membrane 34, isoform CRA_a [        | 3  | 12  | transport                            | 1.064 | 2.117 | 2.162 |
| 1937861 | unnamed protein product [Homo sapiens]                                 | 2  | 5   | ic process; response to stimulus     | 1.065 | 2.104 | 2.111 |
| 1043481 | unnamed protein product [Homo sapiens]                                 | 2  | 4   | ; regulation of biological process   | 0.905 | 2.099 | 1.924 |
| 1195851 | ribosomal protein L29, isoform CRA_a [Homo sapiens]                    | 2  | 5   | zation and biogenesis; transport     | 0.839 | 2.097 | 2.061 |
| 1592941 | MAP4 protein [Homo sapiens]                                            | 6  | 19  | nponent movement; cell division      | 1.046 | 2.096 | 1.590 |
| 1195691 | pleckstrin homology domain interacting protein, isoform CRA_a [H       | 10 | 20  | biogenesis; response to stimulus     | 1.014 | 2.095 | 1.998 |
| 7679251 | PREDICTED: segment polarity protein dishevelled homolog DVL-3          | 3  | 12  | velopment; response to stimulus      | 0.854 | 2.093 | 1.865 |
| 1890531 | unnamed protein product [Homo sapiens]                                 | 2  | 5   | cell organization and biogenesis     | 0.820 | 2.091 | 1.767 |
| 4995291 | 2-methylacyl-CoA racemase [Homo sapiens]                               | 2  | 11  | metabolic process                    | 1.136 | 2.084 | 1.751 |
| 2210441 | unnamed protein product [Homo sapiens]                                 | 4  | 8   | transport                            | 0.872 | 2.082 | 1.851 |
| 1196111 | microsomal glutathione S-transferase 3, isoform CRA_b [Homo sa         | 4  | 38  | al process; response to stimulus     | 1.027 | 2.078 | 1.848 |
| 7336061 | transducin-like enhancer protein 1 isoform 3 [Homo sapiens]            | 8  | 27  | sponse to stimulus; development      | 1.003 | 2.076 | 2.009 |
| 1195691 | BCL2-associated athanogene 3, isoform CRA_a [Homo sapiens]             | 3  | 4   | al process; response to stimulus     | 0.828 | 2.069 | 2.176 |
| 2540281 | serine/threonine-protein kinase MARK2 isoform f [Homo sapiens]         | 6  | 12  | al process; response to stimulus     | 0.800 | 2.065 | 1.807 |
| 1195801 | SNAP25-interacting protein [Homo sapiens]                              | 3  | 5   | cell organization and biogenesis     | 0.900 | 2.058 | 2.195 |
| 2015111 | Chain B, Crystal Structure Of The 53bp1 Brct Region Complexed T        | 2  | 3   |                                      | 1.030 | 2.055 | 1.900 |

|        |                                                                       |    |     |                                      |       |       |       |
|--------|-----------------------------------------------------------------------|----|-----|--------------------------------------|-------|-------|-------|
| 104342 | unnamed protein product [Homo sapiens]                                | 4  | 7   | metabolic process                    | 1.013 | 2.049 | 1.968 |
| 194387 | unnamed protein product [Homo sapiens]                                | 3  | 7   | ; regulation of biological process   | 1.002 | 2.044 | 1.975 |
| 530427 | PREDICTED: heterogeneous nuclear ribonucleoprotein M isoform          | 26 | 199 | metabolic process                    | 0.925 | 2.036 | 1.799 |
| 119606 | methionine sulfoxide reductase B2, isoform CRA_b [Homo sapiens]       | 2  | 4   | d biogenesis; metabolic process      | 0.976 | 2.026 | 1.729 |
| 274620 | MSTP059 [Homo sapiens]                                                | 2  | 3   | gical process; metabolic process     | 0.908 | 2.021 | 1.731 |
| 193788 | unnamed protein product [Homo sapiens]                                | 2  | 2   | ; regulation of biological process   | 1.065 | 2.005 | 2.222 |
| 119626 | latrophilin 2, isoform CRA_e [Homo sapiens]                           | 5  | 9   | al process; response to stimulus     | 0.789 | 2.002 | 2.032 |
| 156800 | Stathmin 1/oncoprotein 18 [Homo sapiens]                              | 4  | 23  | al process; response to stimulus     | 1.080 | 2.002 | 1.987 |
| 767925 | PREDICTED: insulin-like growth factor 2 mRNA-binding protein 2 i      | 2  | 2   | h of biological process; transport   | 1.071 | 1.999 | 2.054 |
| 119589 | hCG22695, isoform CRA_d [Homo sapiens]                                | 2  | 11  | transport                            | 0.926 | 1.989 | 1.832 |
| 119592 | ribosomal protein S5, isoform CRA_b [Homo sapiens]                    | 7  | 44  | h of biological process; transport   | 1.058 | 1.985 | 1.560 |
| 116812 | protein FAM98C [Homo sapiens]                                         | 6  | 19  |                                      | 0.983 | 1.983 | 1.778 |
| 731187 | Chain A, Crystal Structure Of The Non-phosphorylated Human Alp        | 6  | 13  |                                      | 0.941 | 1.982 | 1.398 |
| 158256 | unnamed protein product [Homo sapiens]                                | 2  | 4   | al process; response to stimulus     | 0.854 | 1.980 | 1.632 |
| 189069 | unnamed protein product [Homo sapiens]                                | 2  | 3   | nd biogenesis; cell differentiation  | 1.176 | 1.979 | 1.729 |
| 385020 | AGC-like kinases, partial [Homo sapiens]                              | 2  | 3   |                                      | 0.847 | 1.977 | 1.812 |
| 767981 | PREDICTED: zinc finger CCCH domain-containing protein 14 isofo        | 3  | 5   | regulation of biological process     | 0.898 | 1.974 | 1.991 |
| 214394 | unnamed protein product [Homo sapiens]                                | 2  | 10  |                                      | 0.878 | 1.974 | 2.012 |
| 119570 | multiple inositol polyphosphate histidine phosphatase, 1, isoform     | 3  | 7   | metabolic process                    | 1.024 | 1.974 | 1.700 |
| 119575 | integrin, alpha 2 (CD49B, alpha 2 subunit of VLA-2 receptor), isofo   | 6  | 8   | nd biogenesis; cell differentiation  | 0.962 | 1.966 | 1.898 |
| 119602 | nudix (nucleoside diphosphate linked moiety X)-type motif 14, isof    | 2  | 5   | metabolic process                    | 1.143 | 1.963 | 1.517 |
| 119594 | vacuolar protein sorting 37C (yeast), isoform CRA_c, partial [Homo    | 2  | 6   | d biogenesis; metabolic process      | 0.909 | 1.957 | 1.611 |
| 701842 | hypothetical protein [Homo sapiens]                                   | 2  | 2   |                                      | 0.836 | 1.953 | 1.743 |
| 556695 | RNA polymerase-associated protein LEO1 isoform 2 [Homo sapiens]       | 2  | 8   | al process; response to stimulus     | 0.729 | 1.950 | 2.045 |
| 119601 | splicing factor, arginine/serine-rich 5, isoform CRA_e, partial [Homo | 3  | 27  | ; regulation of biological process   | 0.860 | 1.948 | 1.739 |
| 756143 | Chain C, Crystal Structure Of Autophagic Snare Complex                | 2  | 5   |                                      | 0.776 | 1.947 | 1.787 |
| 119594 | similar to RIKEN cDNA 1810059G22, isoform CRA_a [Homo sapiens]        | 2  | 2   |                                      | 0.921 | 1.947 | 1.739 |
| 702041 | unnamed protein product [Homo sapiens]                                | 4  | 15  | ; regulation of biological process   | 0.949 | 1.937 | 1.781 |
| 578838 | PREDICTED: peripheral plasma membrane protein CASK isoform X          | 4  | 6   | cell organization and biogenesis     | 0.982 | 1.937 | 1.866 |
| 333377 | FWP010 [Homo sapiens]                                                 | 3  | 15  | ; regulation of biological process   | 0.967 | 1.934 | 2.106 |
| 194375 | unnamed protein product [Homo sapiens]                                | 6  | 28  | metabolic process                    | 1.184 | 1.927 | 1.881 |
| 100472 | KIAA1598 protein, partial [Homo sapiens]                              | 2  | 4   | s; cellular component movement       | 0.837 | 1.926 | 1.678 |
| 119593 | RNA terminal phosphate cyclase domain 1, isoform CRA_b [Homo          | 2  | 5   | metabolic process                    | 1.343 | 1.920 | 1.339 |
| 194386 | unnamed protein product [Homo sapiens]                                | 14 | 156 | ; regulation of biological process   | 1.000 | 1.913 | 2.034 |
| 409771 | unnamed protein product, partial [Homo sapiens]                       | 2  | 3   |                                      | 0.954 | 1.911 | 1.446 |
| 578802 | PREDICTED: DNA (cytosine-5)-methyltransferase 3A isoform X6 [H        | 2  | 4   | us; cell differentiation; cell death | 0.806 | 1.907 | 1.862 |
| 767968 | PREDICTED: cleavage and polyadenylation specificity factor subu       | 8  | 42  | cell organization and biogenesis     | 0.865 | 1.905 | 1.704 |
| 620874 | SAM domain- and HD domain-containing protein 1 variant, partial       | 3  | 12  | nd biogenesis; defense response      | 1.165 | 1.897 | 1.999 |
| 132791 | TRIOBP protein, partial [Homo sapiens]                                | 2  | 2   | f biological process; cell division  | 0.897 | 1.897 | 1.821 |
| 119609 | WNK lysine deficient protein kinase 1, isoform CRA_d [Homo sapi       | 3  | 13  | al process; response to stimulus     | 0.813 | 1.892 | 1.872 |

|        |                                                                    |    |     |                                     |       |       |       |
|--------|--------------------------------------------------------------------|----|-----|-------------------------------------|-------|-------|-------|
| 119622 | tumor suppressing subtransferable candidate 4, isoform CRA_b [H    | 3  | 9   |                                     | 0.820 | 1.885 | 2.002 |
| 194384 | unnamed protein product [Homo sapiens]                             | 2  | 2   |                                     | 0.930 | 1.885 | 1.697 |
| 400404 | unnamed protein product, partial [Homo sapiens]                    | 5  | 49  |                                     | 1.150 | 1.881 | 1.979 |
| 400418 | unnamed protein product, partial [Homo sapiens]                    | 3  | 22  |                                     | 0.960 | 1.877 | 1.821 |
| 119618 | splicing factor, arginine/serine-rich 9 [Homo sapiens]             | 6  | 44  | regulation of biological process    | 1.013 | 1.876 | 1.915 |
| 239781 | Chain A, The Crystal Structure Of The Reduced Form Of Human Ss     | 4  | 8   | metabolic process                   | 1.036 | 1.870 | 2.129 |
| 119581 | sideroflexin 1, isoform CRA_a [Homo sapiens]                       | 11 | 91  | transport; cell differentiation     | 1.085 | 1.869 | 1.759 |
| 119592 | hCG1748748 [Homo sapiens]                                          | 2  | 3   |                                     | 0.926 | 1.865 | 1.564 |
| 189067 | unnamed protein product [Homo sapiens]                             | 12 | 133 | cell organization and biogenesis    | 1.166 | 1.861 | 1.948 |
| 119612 | hCG2008737 [Homo sapiens]                                          | 4  | 37  |                                     | 0.985 | 1.851 | 1.707 |
| 119579 | hCG2011540, isoform CRA_b [Homo sapiens]                           | 2  | 8   | regulation of biological process    | 0.817 | 1.850 | 1.832 |
| 892392 | core histone macro-H2A.2 [Homo sapiens]                            | 7  | 23  | cell organization and biogenesis    | 0.903 | 1.848 | 2.080 |
| 119628 | brain abundant, membrane attached signal protein 1, isoform CRA    | 2  | 5   | nd biogenesis; cell differentiation | 0.866 | 1.841 | 1.440 |
| 558757 | Golgi-associated plant pathogenesis-related protein 1 isoform b [H | 2  | 3   | regulation of biological process    | 0.983 | 1.840 | 1.513 |
| 767909 | PREDICTED: myocyte-specific enhancer factor 2D isoform X5 [Hor     | 4  | 9   | regulation of biological process    | 0.996 | 1.835 | 1.529 |
| 221044 | unnamed protein product [Homo sapiens]                             | 2  | 8   | metabolic process                   | 0.951 | 1.835 | 1.765 |
| 221045 | unnamed protein product [Homo sapiens]                             | 2  | 3   | response to stimulus; coagulation   | 1.248 | 1.835 | 1.662 |
| 194391 | unnamed protein product [Homo sapiens]                             | 5  | 22  | metabolic process                   | 0.959 | 1.834 | 1.669 |
| 904418 | PTGFRN protein, partial [Homo sapiens]                             | 4  | 16  | cell organization and biogenesis    | 1.034 | 1.833 | 1.792 |
| 194375 | unnamed protein product [Homo sapiens]                             | 3  | 4   | regulation of biological process    | 0.989 | 1.831 | 1.710 |
| 119602 | eukaryotic translation initiation factor 5, isoform CRA_b [Homo sa | 2  | 2   | regulation of biological process    | 1.154 | 1.831 | 1.810 |
| 149165 | dystrobrevin alpha isoform 8 [Homo sapiens]                        | 5  | 7   | to stimulus; cell communication     | 0.885 | 1.819 | 1.724 |
| 530367 | PREDICTED: rab11 family-interacting protein 5 isoform X3 [Homo s   | 4  | 8   | al process; response to stimulus    | 0.848 | 1.818 | 2.055 |
| 767938 | PREDICTED: RUN and FYVE domain-containing protein 1 isoform        | 4  | 8   | regulation of biological process    | 0.828 | 1.818 | 1.759 |
| 119591 | nucleolar protein 9 [Homo sapiens]                                 | 2  | 2   | metabolic process                   | 1.183 | 1.816 | 1.628 |
| 203855 | placental protein KG-20 [Homo sapiens]                             | 3  | 5   | cell organization and biogenesis    | 1.171 | 1.814 | 1.892 |
| 119583 | acetyl-Coenzyme A acyltransferase 2 (mitochondrial 3-oxoacyl-Co    | 3  | 5   | regulation of biological process    | 0.989 | 1.813 | 1.758 |
| 119605 | zinc finger protein 598, isoform CRA_e [Homo sapiens]              | 3  | 7   |                                     | 0.725 | 1.809 | 1.703 |
| 119574 | ATP-binding cassette, sub-family F (GCN20), member 2, isoform C    | 7  | 32  | transport; metabolic process        | 0.824 | 1.808 | 1.746 |
| 119604 | zinc finger CCCH-type, antiviral 1, isoform CRA_b, partial [Homo s | 5  | 10  | gical process; defense response     | 0.826 | 1.798 | 1.656 |
| 492565 | Kinesin light chain 3 [Homo sapiens]                               | 3  | 8   | ent; transport; metabolic process   | 0.970 | 1.787 | 1.703 |
| 119603 | engulfment and cell motility 3, isoform CRA_b [Homo sapiens]       | 3  | 8   | h; cellular component movement      | 0.974 | 1.784 | 1.812 |
| 135093 | ribosomal protein L27a [Homo sapiens]                              | 4  | 23  | ization and biogenesis; transport   | 1.123 | 1.783 | 1.659 |
| 288965 | Chain B, Human Sumo E1~sumo1-amp Tetrahedral Intermediate M        | 2  | 12  | metabolic process                   | 1.035 | 1.781 | 1.546 |
| 221040 | unnamed protein product [Homo sapiens]                             | 2  | 6   | gical process; metabolic process    | 0.896 | 1.779 | 1.771 |
| 995464 | XRCC1 DNA repair protein, partial [Homo sapiens]                   | 3  | 8   | ic process; response to stimulus    | 0.927 | 1.776 | 1.635 |
| 194382 | unnamed protein product [Homo sapiens]                             | 11 | 54  | regulation of biological process    | 0.905 | 1.773 | 1.688 |
| 673022 | Chain D, Crystal Structure Of Human Profilin Ii                    | 4  | 23  | cell organization and biogenesis    | 0.978 | 1.766 | 1.781 |
| 288383 | BCLAF1 protein, partial [Homo sapiens]                             | 2  | 5   | al process; response to stimulus    | 0.907 | 1.762 | 1.456 |
| 767930 | PREDICTED: replication factor C subunit 1 isoform X2 [Homo sapi    | 2  | 5   | al process; cellular homeostasis    | 1.097 | 1.755 | 1.464 |



|        |                                                                      |    |    |                                      |       |       |       |
|--------|----------------------------------------------------------------------|----|----|--------------------------------------|-------|-------|-------|
| 647624 | lys-63-specific deubiquitinase BRCC36 isoform 2 [Homo sapiens]       | 2  | 3  | cell organization and biogenesis     | 0.983 | 1.755 | 1.274 |
| 119594 | splicing factor 1, isoform CRA_d [Homo sapiens]                      | 6  | 28 | regulation of biological process     | 0.986 | 1.754 | 1.659 |
| 119595 | peroxisomal proliferator-activated receptor A interacting complex    | 4  | 6  | regulation of biological process     | 0.903 | 1.753 | 1.629 |
| 119609 | solute carrier family 39 (metal ion transporter), member 11, isoform | 3  | 4  | transport; cellular homeostasis      | 1.009 | 1.741 | 1.583 |
| 104353 | unnamed protein product, partial [Homo sapiens]                      | 4  | 6  | of biological process; cell death    | 0.880 | 1.739 | 1.565 |
| 166295 | uncharacterized protein C17orf85 [Homo sapiens]                      | 2  | 3  | response; response to stimulus       | 0.807 | 1.738 | 1.728 |
| 119627 | cell division cycle associated 8, isoform CRA_a [Homo sapiens]       | 2  | 6  | response to stimulus; cell division  | 0.928 | 1.737 | 1.582 |
| 450397 | starch-binding domain-containing protein 1 [Homo sapiens]            | 6  | 15 | metabolic process                    | 0.930 | 1.733 | 1.571 |
| 131247 | protein HGH1 homolog [Homo sapiens]                                  | 2  | 3  |                                      | 0.911 | 1.731 | 1.717 |
| 119595 | START domain containing 10, isoform CRA_c [Homo sapiens]             | 3  | 5  | regulation of biological process     | 1.366 | 1.724 | 1.841 |
| 767973 | PREDICTED: cysteine and glycine-rich protein 2 isoform X1 [Homo      | 2  | 14 | development; cell differentiation    | 1.004 | 1.722 | 1.595 |
| 119598 | vacuolar protein sorting 13C (yeast), isoform CRA_h [Homo sapien     | 4  | 6  | transport                            | 0.869 | 1.716 | 1.695 |
| 119601 | spectrin repeat containing, nuclear envelope 2, isoform CRA_g [Ho    | 8  | 14 | regulation of biological process     | 0.930 | 1.716 | 1.591 |
| 215407 | unnamed protein product, partial [Homo sapiens]                      | 3  | 15 |                                      | 0.946 | 1.714 | 1.512 |
| 120659 | Histone cluster 1, H1t [Homo sapiens]                                | 8  | 85 | n; cellular component movement       | 1.039 | 1.713 | 1.628 |
| 409768 | unnamed protein product, partial [Homo sapiens]                      | 3  | 5  |                                      | 0.847 | 1.710 | 1.569 |
| 541984 | hypothetical protein, partial [Homo sapiens]                         | 3  | 5  | al process; response to stimulus     | 0.866 | 1.709 | 1.672 |
| 119615 | ciliary rootlet coiled-coil, rootletin, isoform CRA_a [Homo sapiens] | 5  | 12 | cell organization and biogenesis     | 0.962 | 1.709 | 1.530 |
| 118600 | SCRIB protein, partial [Homo sapiens]                                | 5  | 9  | zation and biogenesis; cell death    | 0.851 | 1.709 | 1.676 |
| 306549 | homology to rat ribosomal protein L23, partial [Homo sapiens]        | 4  | 16 | cess; transport; cell proliferation  | 1.145 | 1.707 | 1.664 |
| 221044 | unnamed protein product [Homo sapiens]                               | 7  | 14 | ss; metabolic process; transport     | 0.845 | 1.707 | 1.773 |
| 344030 | testis-expressed sequence 264 protein isoform 2 [Homo sapiens]       | 2  | 10 |                                      | 1.102 | 1.703 | 1.802 |
| 194387 | unnamed protein product [Homo sapiens]                               | 4  | 14 | cell organization and biogenesis     | 1.114 | 1.702 | 1.733 |
| 189053 | unnamed protein product [Homo sapiens]                               | 5  | 11 | d biogenesis; metabolic process      | 1.052 | 1.700 | 1.692 |
| 892339 | MICOS complex subunit MIC19 [Homo sapiens]                           | 3  | 27 | cell organization and biogenesis     | 1.075 | 1.699 | 1.617 |
| 165506 | unnamed protein product [Homo sapiens]                               | 5  | 16 | regulation of biological process     | 1.094 | 1.698 | 1.591 |
| 194374 | unnamed protein product [Homo sapiens]                               | 12 | 68 | n of biological process; transport   | 0.864 | 1.696 | 1.518 |
| 628224 | unknown, partial [Homo sapiens]                                      | 3  | 7  | cell organization and biogenesis     | 0.950 | 1.695 | 1.493 |
| 119626 | 3-hydroxybutyrate dehydrogenase, type 2, isoform CRA_c [Homo s       | 2  | 3  | abolic process; cell differentiation | 0.774 | 1.693 | 1.535 |
| 767944 | PREDICTED: peptidyl-prolyl cis-trans isomerase FKBP9 isoform X       | 2  | 2  | metabolic process                    | 1.077 | 1.692 | 1.789 |
| 146029 | FKBP8 protein [Homo sapiens]                                         | 5  | 9  | al process; response to stimulus     | 1.133 | 1.689 | 1.506 |
| 189065 | unnamed protein product [Homo sapiens]                               | 4  | 10 | regulation of biological process     | 0.963 | 1.688 | 1.388 |
| 767977 | PREDICTED: fibrosin-1-like protein isoform X19 [Homo sapiens]        | 2  | 3  |                                      | 0.829 | 1.686 | 1.331 |
| 768054 | PREDICTED: N(G),N(G)-dimethylarginine dimethylaminohydrolase         | 7  | 48 | al process; response to stimulus     | 0.887 | 1.683 | 1.680 |
| 326319 | centrosomal protein of 170 kDa protein B isoform 2 [Homo sapiens]    | 2  | 2  |                                      | 1.323 | 1.682 | 1.776 |
| 119622 | nucleosome assembly protein 1-like 4, isoform CRA_a [Homo sapi       | 3  | 18 | cell organization and biogenesis     | 1.312 | 1.677 | 1.410 |
| 119594 | multiple endocrine neoplasia I, isoform CRA_c [Homo sapiens]         | 2  | 4  | biogenesis; cellular homeostasis     | 1.173 | 1.674 | 1.643 |
| 119602 | similar to RIKEN cDNA C030006K11 gene, isoform CRA_b [Homo s         | 5  | 27 |                                      | 0.855 | 1.673 | 1.350 |
| 221043 | unnamed protein product [Homo sapiens]                               | 7  | 25 | metabolic process                    | 0.972 | 1.673 | 1.642 |
| 119629 | phosphoglycerate dehydrogenase like 1, isoform CRA_c [Homo sa        | 3  | 8  |                                      | 0.862 | 1.673 | 1.452 |

|        |                                                                                             |    |     |                                     |       |       |       |
|--------|---------------------------------------------------------------------------------------------|----|-----|-------------------------------------|-------|-------|-------|
| 305677 | Chain A, Ralb-Rlip76 (Ralbp1) Complex                                                       | 2  | 3   | al process; response to stimulus    | 0.791 | 1.669 | 1.493 |
| 193787 | unnamed protein product [Homo sapiens]                                                      | 2  | 5   | unication; response to stimulus     | 0.761 | 1.664 | 1.602 |
| 578809 | PREDICTED: 60S ribosomal protein L34 isoform X1 [Homo sapiens]                              | 6  | 53  | zation and biogenesis; transport    | 0.937 | 1.662 | 1.263 |
| 104337 | unnamed protein product [Homo sapiens]                                                      | 2  | 3   | ic process; response to stimulus    | 0.904 | 1.659 | 1.404 |
| 321267 | sialate O-acetylerase isoform 2 [Homo sapiens]                                              | 2  | 5   | gical process; metabolic process    | 0.767 | 1.656 | 1.672 |
| 194384 | unnamed protein product [Homo sapiens]                                                      | 4  | 10  | al process; response to stimulus    | 1.014 | 1.656 | 1.649 |
| 767909 | PREDICTED: hepatoma-derived growth factor isoform X2 [Homo sapiens]                         | 2  | 18  | nse to stimulus; cell proliferation | 0.887 | 1.655 | 1.572 |
| 767912 | PREDICTED: protein ELYS isoform X4 [Homo sapiens]                                           | 7  | 15  | cell organization and biogenesis    | 0.905 | 1.651 | 1.889 |
| 217486 | FLJ00383 protein, partial [Homo sapiens]                                                    | 6  | 18  | ; response to stimulus; transport   | 0.986 | 1.645 | 1.802 |
| 194388 | unnamed protein product [Homo sapiens]                                                      | 3  | 4   | nse to stimulus; cell proliferation | 0.895 | 1.639 | 1.680 |
| 530360 | PREDICTED: protein 4.1 isoform X10 [Homo sapiens]                                           | 3  | 4   | cell organization and biogenesis    | 0.671 | 1.638 | 1.604 |
| 510657 | transcriptional activator SRCAP [Homo sapiens]                                              | 4  | 6   | cell organization and biogenesis    | 0.971 | 1.631 | 1.401 |
| 768039 | PREDICTED: filamin-A isoform X2 [Homo sapiens]                                              | 71 | 481 | ; coagulation; metabolic process    | 0.947 | 1.631 | 1.658 |
| 179389 | BCR-ABL protein, partial [Homo sapiens]                                                     | 2  | 2   | cell organization and biogenesis    | 0.833 | 1.626 | 1.510 |
| 119582 | heterogeneous nuclear ribonucleoprotein A0 [Homo sapiens]                                   | 4  | 21  | ; regulation of biological process  | 0.898 | 1.626 | 1.818 |
| 767914 | PREDICTED: trifunctional enzyme subunit beta, mitochondrial isoform X1 [Homo sapiens]       | 9  | 51  | metabolic process                   | 1.024 | 1.624 | 1.622 |
| 194386 | unnamed protein product, partial [Homo sapiens]                                             | 5  | 22  | transport; metabolic process        | 0.832 | 1.623 | 1.658 |
| 194386 | unnamed protein product [Homo sapiens]                                                      | 2  | 4   | ; metabolic process; cell division  | 0.881 | 1.619 | 2.078 |
| 119609 | G protein-coupled receptor, family C, group 5, member C, isoform X1 [Homo sapiens]          | 2  | 4   | al process; response to stimulus    | 0.775 | 1.618 | 1.407 |
| 317108 | endophilin-A2 isoform 3 [Homo sapiens]                                                      | 3  | 16  | al process; response to stimulus    | 0.904 | 1.614 | 1.521 |
| 347543 | dihydropyrimidinase-related protein 2 isoform 3 [Homo sapiens]                              | 3  | 7   | s; cellular component movement      | 0.871 | 1.612 | 1.510 |
| 492956 | CGI-49 protein [Homo sapiens]                                                               | 3  | 13  | metabolic process                   | 1.045 | 1.611 | 1.438 |
| 194383 | unnamed protein product [Homo sapiens]                                                      | 2  | 2   | ; regulation of biological process  | 1.002 | 1.608 | 1.592 |
| 189053 | unnamed protein product [Homo sapiens]                                                      | 14 | 50  | ic process; response to stimulus    | 1.089 | 1.604 | 1.718 |
| 194382 | unnamed protein product [Homo sapiens]                                                      | 3  | 17  | gical process; metabolic process    | 0.895 | 1.603 | 1.514 |
| 509493 | hypothetical protein, partial [Homo sapiens]                                                | 2  | 4   | metabolic process                   | 0.874 | 1.602 | 1.463 |
| 345324 | unnamed protein product [Homo sapiens]                                                      | 3  | 12  |                                     | 1.054 | 1.601 | 1.335 |
| 600571 | ATP synthase subunit e, mitochondrial [Homo sapiens]                                        | 3  | 16  | metabolic process; transport        | 1.209 | 1.598 | 1.486 |
| 119580 | pyridoxal (pyridoxine, vitamin B6) phosphatase, isoform CRA_a [Homo sapiens]                | 4  | 16  | biogenesis; response to stimulus    | 0.918 | 1.597 | 1.493 |
| 119599 | zinc finger protein 9 (a cellular retroviral nucleic acid binding protein 9) [Homo sapiens] | 3  | 13  | ; regulation of biological process  | 0.939 | 1.596 | 1.752 |
| 347833 | ZC3H7B protein, partial [Homo sapiens]                                                      | 2  | 3   |                                     | 1.106 | 1.594 | 1.437 |
| 837550 | Chain C, Structure Of Human Decr Ternary Complex                                            | 9  | 40  | metabolic process                   | 0.975 | 1.592 | 1.563 |
| 119629 | collagen, type VI, alpha 1, isoform CRA_b, partial [Homo sapiens]                           | 10 | 43  | ic process; response to stimulus    | 0.865 | 1.589 | 1.435 |
| 590166 | hypothetical protein, partial [Homo sapiens]                                                | 4  | 20  | cell organization and biogenesis    | 0.975 | 1.588 | 1.751 |
| 189053 | unnamed protein product [Homo sapiens]                                                      | 12 | 76  | metabolic process                   | 1.065 | 1.588 | 1.507 |
| 119609 | splicing factor, arginine/serine-rich 2, isoform CRA_d [Homo sapiens]                       | 2  | 5   | ss; metabolic process; transport    | 0.830 | 1.586 | 1.400 |
| 996529 | protocadherin-beta8, partial [Homo sapiens]                                                 | 3  | 6   |                                     | 1.285 | 1.585 | 1.677 |
| 189069 | unnamed protein product [Homo sapiens]                                                      | 9  | 47  | metabolic process                   | 1.080 | 1.582 | 1.488 |
| 189053 | unnamed protein product [Homo sapiens]                                                      | 2  | 5   | n of biological process; transport  | 0.926 | 1.580 | 1.426 |
| 481464 | HIP-55 [Homo sapiens]                                                                       | 6  | 22  | ; regulation of biological process  | 0.858 | 1.579 | 1.391 |

|        |                                                                                                |    |    |                                     |       |       |       |
|--------|------------------------------------------------------------------------------------------------|----|----|-------------------------------------|-------|-------|-------|
| 119627 | hCG27868, isoform CRA_c [Homo sapiens]                                                         | 2  | 5  | regulation of biological process    | 0.809 | 1.579 | 1.641 |
| 400409 | unnamed protein product, partial [Homo sapiens]                                                | 2  | 8  |                                     | 0.912 | 1.579 | 1.571 |
| 119624 | hCG2000808, partial [Homo sapiens]                                                             | 2  | 2  |                                     | 0.797 | 1.579 | 1.456 |
| 767948 | PREDICTED: E3 ubiquitin-protein ligase Hakai isoform X1 [Homo sapiens]                         | 2  | 3  | gical process; metabolic process    | 0.869 | 1.576 | 1.457 |
| 119587 | ribosomal protein L13, isoform CRA_a [Homo sapiens]                                            | 7  | 85 | zation and biogenesis; transport    | 1.052 | 1.575 | 1.522 |
| 193783 | unnamed protein product [Homo sapiens]                                                         | 2  | 6  | ; regulation of biological process  | 0.984 | 1.575 | 1.405 |
| 839216 | putative sodium-coupled neutral amino acid transporter 10 isoform X1 [Homo sapiens]            | 4  | 6  | transport                           | 0.847 | 1.575 | 1.333 |
| 226530 | protein-methionine sulfoxide oxidase MICAL1 isoform 2 [Homo sapiens]                           | 2  | 8  | e to stimulus; metabolic process    | 0.897 | 1.574 | 1.473 |
| 194380 | unnamed protein product [Homo sapiens]                                                         | 9  | 34 | al process; response to stimulus    | 1.039 | 1.574 | 1.665 |
| 449717 | death inducer-obliterator-3 [Homo sapiens]                                                     | 10 | 29 | al process; response to stimulus    | 0.874 | 1.573 | 1.394 |
| 119572 | open homolog, transcriptional regulator (Drosophila) [Homo sapiens]                            | 4  | 6  | ic process; response to stimulus    | 0.809 | 1.572 | 1.437 |
| 514761 | hypothetical protein [Homo sapiens]                                                            | 7  | 12 | regulation of biological process    | 0.938 | 1.571 | 1.547 |
| 194379 | unnamed protein product [Homo sapiens]                                                         | 8  | 28 | ; regulation of biological process  | 0.932 | 1.567 | 1.484 |
| 400468 | unnamed protein product [Homo sapiens]                                                         | 2  | 8  |                                     | 1.072 | 1.566 | 1.440 |
| 165190 | syntaxin-16D [Homo sapiens]                                                                    | 2  | 3  | cell organization and biogenesis    | 0.804 | 1.566 | 1.555 |
| 119603 | hypothetical protein FLJ20718, isoform CRA_c, partial [Homo sapiens]                           | 3  | 9  |                                     | 1.017 | 1.565 | 1.344 |
| 221042 | unnamed protein product [Homo sapiens]                                                         | 4  | 12 | e to stimulus; metabolic process    | 0.956 | 1.565 | 1.453 |
| 767985 | PREDICTED: tumor suppressor p53-binding protein 1 isoform X2 [Homo sapiens]                    | 6  | 15 | ; regulation of biological process  | 0.796 | 1.562 | 1.553 |
| 767962 | PREDICTED: ankyrin-3 isoform X26 [Homo sapiens]                                                | 12 | 27 | component movement; transport       | 0.865 | 1.561 | 1.441 |
| 189054 | unnamed protein product [Homo sapiens]                                                         | 7  | 23 | metabolic process                   | 0.895 | 1.553 | 1.459 |
| 767975 | PREDICTED: transmembrane protein 263 isoform X1 [Homo sapiens]                                 | 3  | 8  |                                     | 1.026 | 1.552 | 1.402 |
| 768016 | PREDICTED: RNA-binding protein Raly isoform X1 [Homo sapiens]                                  | 12 | 73 | metabolic process                   | 0.986 | 1.550 | 1.450 |
| 119595 | protein phosphatase 1, regulatory subunit 3D [Homo sapiens]                                    | 2  | 4  | ; regulation of biological process  | 0.961 | 1.549 | 1.682 |
| 339911 | NAPRT1 protein [Homo sapiens]                                                                  | 6  | 30 | ic process; response to stimulus    | 1.033 | 1.548 | 1.393 |
| 101296 | PAXNEB protein, partial [Homo sapiens]                                                         | 2  | 6  | gical process; metabolic process    | 1.093 | 1.548 | 1.698 |
| 189053 | unnamed protein product [Homo sapiens]                                                         | 6  | 23 | d biogenesis; metabolic process     | 1.090 | 1.546 | 1.306 |
| 119571 | hCG30303 [Homo sapiens]                                                                        | 2  | 4  |                                     | 1.039 | 1.544 | 1.616 |
| 316571 | DDB1- and CUL4-associated factor 11 isoform 2 [Homo sapiens]                                   | 3  | 10 | metabolic process                   | 0.765 | 1.543 | 1.401 |
| 530415 | PREDICTED: transcription activator BRG1 isoform X4 [Homo sapiens]                              | 9  | 22 | d biogenesis; metabolic process     | 0.993 | 1.541 | 1.400 |
| 119586 | sorting nexin 6, isoform CRA_a [Homo sapiens]                                                  | 2  | 4  | cell organization and biogenesis    | 1.076 | 1.540 | 1.497 |
| 119617 | ATPase, Ca++ transporting, plasma membrane 1, isoform CRA_b [Homo sapiens]                     | 11 | 36 | ; coagulation; metabolic process    | 1.006 | 1.539 | 1.500 |
| 261278 | cell growth regulator with EF hand domain protein 1 isoform a [Homo sapiens]                   | 3  | 4  | ; regulation of biological process  | 0.747 | 1.538 | 1.463 |
| 193785 | unnamed protein product [Homo sapiens]                                                         | 2  | 3  | bolic process; cell differentiation | 1.069 | 1.537 | 1.647 |
| 119601 | gephyrin, isoform CRA_c [Homo sapiens]                                                         | 2  | 11 | cell organization and biogenesis    | 1.099 | 1.535 | 1.261 |
| 158260 | unnamed protein product [Homo sapiens]                                                         | 2  | 9  | metabolic process; transport        | 0.888 | 1.535 | 1.511 |
| 471244 | Serpin peptidase inhibitor, clade H (heat shock protein 47), member 1 [Homo sapiens]           | 13 | 57 | d biogenesis; metabolic process     | 1.004 | 1.534 | 1.632 |
| 119608 | ATPase, Class VI, type 11C, isoform CRA_b, partial [Homo sapiens]                              | 5  | 8  | ; regulation of biological process  | 1.016 | 1.533 | 1.444 |
| 104382 | unnamed protein product [Homo sapiens]                                                         | 3  | 5  | ; regulation of biological process  | 0.781 | 1.533 | 1.597 |
| 119626 | heterogeneous nuclear ribonucleoprotein D (AU-rich element RNA binding protein) [Homo sapiens] | 6  | 37 | ; regulation of biological process  | 0.872 | 1.532 | 1.507 |
| 312176 | uncharacterized protein KIAA1522 isoform 2 [Homo sapiens]                                      | 4  | 9  | metabolic process                   | 0.879 | 1.532 | 1.251 |

|        |                                                                                                            |    |     |                                               |       |       |       |
|--------|------------------------------------------------------------------------------------------------------------|----|-----|-----------------------------------------------|-------|-------|-------|
| 150793 | Processing of precursor 1, ribonuclease P/MRP subunit (S. cerevisiae)                                      | 5  | 11  | metabolic process                             | 1.025 | 1.530 | 1.498 |
| 151935 | MRIP-1 [Homo sapiens]                                                                                      | 6  | 17  | cellular process; response to stimulus        | 0.923 | 1.527 | 1.505 |
| 119588 | tumor protein p53 inducible protein 11, isoform CRA_c [Homo sapiens]                                       | 2  | 11  | regulation of biological process              | 1.013 | 1.524 | 1.378 |
| 119595 | VAMP (vesicle-associated membrane protein)-associated protein B [Homo sapiens]                             | 3  | 8   | cellular process; cell death                  | 0.960 | 1.524 | 1.434 |
| 767962 | PREDICTED: cytosolic purine 5'-nucleotidase isoform X8 [Homo sapiens]                                      | 10 | 24  | metabolic process                             | 1.096 | 1.522 | 1.488 |
| 194373 | unnamed protein product [Homo sapiens]                                                                     | 3  | 6   | transport                                     | 0.951 | 1.520 | 1.632 |
| 119591 | polymerase (RNA) III (DNA directed) polypeptide C (62kD), isoform CRA_c [Homo sapiens]                     | 3  | 5   | response; response to stimulus                | 0.781 | 1.520 | 1.114 |
| 221041 | unnamed protein product [Homo sapiens]                                                                     | 3  | 10  | cellular process; defense response            | 1.043 | 1.520 | 1.360 |
| 671884 | RNA polymerase II subunit A C-terminal domain phosphatase isoform CRA_c [Homo sapiens]                     | 7  | 14  | biological process; cell division             | 0.860 | 1.519 | 1.450 |
| 545479 | mediator of RNA polymerase II transcription subunit 30 isoform 2 [Homo sapiens]                            | 4  | 6   | cellular process; response to stimulus        | 1.010 | 1.519 | 1.423 |
| 881929 | Chain B, Human Ppgalnact-2 Complexed With Manganese And Uridylate [Homo sapiens]                           | 5  | 14  |                                               | 1.028 | 1.519 | 1.424 |
| 530415 | PREDICTED: immunity-related GTPase family Q protein isoform X1 [Homo sapiens]                              | 5  | 28  |                                               | 0.997 | 1.518 | 1.504 |
| 119592 | ATP binding domain 3 [Homo sapiens]                                                                        | 2  | 3   | metabolic process                             | 1.102 | 1.517 | 1.344 |
| 119581 | polypyrimidine tract binding protein 1, isoform CRA_g [Homo sapiens]                                       | 11 | 124 | cellular process; metabolic process           | 1.093 | 1.517 | 1.447 |
| 119589 | hCG2004001, isoform CRA_c [Homo sapiens]                                                                   | 11 | 19  | regulation of biological process              | 0.857 | 1.516 | 1.375 |
| 476786 | PES1 [Homo sapiens]                                                                                        | 8  | 23  | regulation of biological process              | 0.988 | 1.516 | 1.340 |
| 119591 | peroxisomal biogenesis factor 11B, isoform CRA_a [Homo sapiens]                                            | 6  | 16  | cellular process; response to stimulus        | 1.017 | 1.515 | 1.369 |
| 194388 | unnamed protein product [Homo sapiens]                                                                     | 6  | 57  | cellular process; response to stimulus        | 0.983 | 1.514 | 1.473 |
| 119579 | mitochondrial ribosomal protein L50 [Homo sapiens]                                                         | 2  | 12  | cellular process; metabolic process           | 0.782 | 1.514 | 1.617 |
| 767953 | PREDICTED: epiplakin isoform X1 [Homo sapiens]                                                             | 15 | 51  |                                               | 0.988 | 1.513 | 1.579 |
| 119627 | MARCKS-like 1, isoform CRA_b [Homo sapiens]                                                                | 3  | 7   | regulation of biological process              | 0.750 | 1.512 | 1.542 |
| 119596 | discs, large (Drosophila) homolog-associated protein 4, isoform CRA_c [Homo sapiens]                       | 2  | 4   | cell communication                            | 0.929 | 1.511 | 1.376 |
| 568786 | Chain C, Garp-snare Interaction [Homo sapiens]                                                             | 2  | 6   |                                               | 0.879 | 1.511 | 1.442 |
| 194389 | unnamed protein product [Homo sapiens]                                                                     | 3  | 18  | response to stimulus; cellular homeostasis    | 1.007 | 1.508 | 1.347 |
| 128035 | Transgelin 2 [Homo sapiens]                                                                                | 11 | 244 | cell differentiation                          | 0.949 | 1.507 | 1.305 |
| 119585 | adaptor protein containing pH domain, PTB domain and leucine zipper domain [Homo sapiens]                  | 2  | 5   | response to stimulus; cell proliferation      | 0.932 | 1.507 | 1.420 |
| 119600 | ribosomal protein L24, isoform CRA_c [Homo sapiens]                                                        | 4  | 23  | cellular process; cellular component movement | 0.969 | 1.507 | 1.417 |
| 530391 | PREDICTED: endophilin-B2 isoform X6 [Homo sapiens]                                                         | 4  | 16  |                                               | 1.112 | 1.507 | 1.431 |
| 251143 | calcium/calmodulin-dependent protein kinase II, partial [Homo sapiens]                                     | 2  | 5   | cell organization and biogenesis              | 0.992 | 1.505 | 1.452 |
| 119627 | splicing factor proline/glutamine-rich (polypyrimidine tract binding protein) isoform CRA_c [Homo sapiens] | 13 | 120 | cell organization and biogenesis              | 1.030 | 1.504 | 1.508 |
| 119605 | GEM interacting protein, isoform CRA_c, partial [Homo sapiens]                                             | 4  | 7   | cellular process; response to stimulus        | 0.821 | 1.504 | 1.541 |
| 767980 | PREDICTED: ubiquinone biosynthesis monooxygenase COQ6 isoform CRA_c [Homo sapiens]                         | 3  | 11  | metabolic process                             | 1.053 | 1.502 | 1.253 |
| 120019 | My016 protein [Homo sapiens]                                                                               | 2  | 7   |                                               | 0.990 | 1.492 | 1.523 |
| 645346 | hypothetical protein, partial [Homo sapiens]                                                               | 2  | 3   | response to stimulus; metabolic process       | 1.020 | 1.490 | 1.439 |
| 119586 | O-sialoglycoprotein endopeptidase, isoform CRA_a [Homo sapiens]                                            | 2  | 14  | metabolic process                             | 0.789 | 1.490 | 1.432 |
| 119585 | pyruvate dehydrogenase (lipoamide) beta, isoform CRA_b [Homo sapiens]                                      | 2  | 4   | regulation of biological process              | 1.233 | 1.486 | 1.159 |
| 119594 | hCG2044837 [Homo sapiens]                                                                                  | 2  | 3   | cellular process; response to stimulus        | 0.845 | 1.484 | 1.349 |
| 767968 | PREDICTED: 39S ribosomal protein L16, mitochondrial isoform X1 [Homo sapiens]                              | 3  | 6   | cell organization and biogenesis              | 0.992 | 1.483 | 1.280 |
| 152772 | G9A [Homo sapiens]                                                                                         | 2  | 3   | cell organization and biogenesis              | 0.853 | 1.481 | 1.349 |
| 767903 | PREDICTED: hydroxymethylglutaryl-CoA synthase, mitochondrial isoform CRA_c [Homo sapiens]                  | 3  | 8   | cellular process; response to stimulus        | 0.861 | 1.479 | 1.717 |



|        |                                                                  |    |     |                                     |       |       |       |
|--------|------------------------------------------------------------------|----|-----|-------------------------------------|-------|-------|-------|
| 470769 | unnamed protein product [Homo sapiens]                           | 5  | 15  | regulation of biological process    | 0.902 | 1.479 | 1.324 |
| 194389 | unnamed protein product [Homo sapiens]                           | 5  | 13  | al process; response to stimulus    | 0.818 | 1.479 | 1.528 |
| 767967 | PREDICTED: lysine-specific demethylase 2A isoform X5 [Homo sa    | 6  | 17  | regulation of biological process    | 1.012 | 1.479 | 1.529 |
| 767961 | PREDICTED: protein O-GlcNAcase isoform X2 [Homo sapiens]         | 2  | 6   | response to stimulus; cell death    | 0.795 | 1.479 | 1.670 |
| 544583 | E3 ubiquitin-protein ligase UBR5 isoform 2 [Homo sapiens]        | 11 | 15  | regulation of biological process    | 0.999 | 1.474 | 1.889 |
| 768012 | PREDICTED: probable ATP-dependent RNA helicase DHX34 isofo       | 3  | 4   | regulation of biological process    | 0.882 | 1.471 | 1.217 |
| 525455 | hypothetical protein [Homo sapiens]                              | 2  | 4   |                                     | 1.274 | 1.470 | 1.474 |
| 119628 | similar to mouse 2310016A09Rik gene, isoform CRA_a [Homo sap     | 4  | 16  | metabolic process                   | 1.096 | 1.470 | 1.385 |
| 767968 | PREDICTED: syntaxin-5 isoform X3 [Homo sapiens]                  | 3  | 5   | cell organization and biogenesis    | 0.913 | 1.470 | 1.687 |
| 209882 | SLC27A3 protein [Homo sapiens]                                   | 9  | 26  | metabolic process                   | 0.976 | 1.468 | 1.361 |
| 228006 | Chromosome 7 open reading frame 27 [Homo sapiens]                | 2  | 4   | h; cellular component movement      | 0.812 | 1.467 | 1.355 |
| 527458 | unnamed protein product [Homo sapiens]                           | 23 | 54  |                                     | 0.957 | 1.467 | 1.294 |
| 119607 | RAB GTPase activating protein 1, isoform CRA_d [Homo sapiens]    | 5  | 12  | regulation of biological process    | 0.929 | 1.466 | 1.308 |
| 929654 | KIAA0766 protein [Homo sapiens]                                  | 4  | 10  |                                     | 0.912 | 1.465 | 1.206 |
| 119586 | protein kinase D1, isoform CRA_a [Homo sapiens]                  | 5  | 11  | esis; cell proliferation; transport | 1.062 | 1.463 | 1.513 |
| 158255 | unnamed protein product [Homo sapiens]                           | 2  | 5   | cell organization and biogenesis    | 1.015 | 1.462 | 1.219 |
| 161731 | UDP-GalNAc:polypeptide N-acetylgalactosaminyltransferase (GalN   | 4  | 8   | metabolic process                   | 1.113 | 1.461 | 1.416 |
| 194385 | unnamed protein product [Homo sapiens]                           | 4  | 10  |                                     | 0.913 | 1.461 | 1.177 |
| 194383 | unnamed protein product, partial [Homo sapiens]                  | 2  | 3   | cell organization and biogenesis    | 0.797 | 1.459 | 1.464 |
| 119621 | hCG23783, isoform CRA_b [Homo sapiens]                           | 20 | 298 | ss; metabolic process; transport    | 1.219 | 1.458 | 1.375 |
| 189065 | unnamed protein product [Homo sapiens]                           | 3  | 10  | al process; response to stimulus    | 0.970 | 1.457 | 1.237 |
| 119577 | vasodilator-stimulated phosphoprotein, isoform CRA_b [Homo sap   | 2  | 7   | al process; response to stimulus    | 0.799 | 1.455 | 1.405 |
| 189053 | unnamed protein product [Homo sapiens]                           | 7  | 81  | cell organization and biogenesis    | 0.917 | 1.455 | 1.565 |
| 578821 | PREDICTED: src substrate cortactin isoform X1 [Homo sapiens]     | 7  | 28  | s; cellular component movement      | 0.822 | 1.454 | 1.503 |
| 767926 | PREDICTED: UBX domain-containing protein 7 isoform X1 [Homo      | 5  | 20  |                                     | 0.864 | 1.453 | 1.393 |
| 113628 | UDP-GalNAc:polypeptide N-acetylgalactosaminyltransferase [Hom    | 3  | 5   | metabolic process                   | 0.763 | 1.453 | 1.285 |
| 119576 | lethal giant larvae homolog 1 (Drosophila), isoform CRA_c [Homo  | 3  | 10  | gical process; cell differentiation | 1.015 | 1.452 | 1.448 |
| 119598 | hCG2004593 [Homo sapiens]                                        | 3  | 13  | metabolic process                   | 1.116 | 1.449 | 1.672 |
| 159163 | Chain A, Solution Structure Of The Ring Domain Of The Synaptota  | 2  | 2   |                                     | 0.886 | 1.445 | 1.272 |
| 530414 | PREDICTED: protein Hook homolog 2 isoform X2 [Homo sapiens]      | 5  | 9   | cell organization and biogenesis    | 0.892 | 1.442 | 1.360 |
| 119608 | nucleoporin 214kDa, isoform CRA_a [Homo sapiens]                 | 6  | 15  | al process; response to stimulus    | 0.943 | 1.437 | 1.307 |
| 173207 | TBP-associated factor, partial [Homo sapiens]                    | 2  | 4   | regulation of biological process    | 0.809 | 1.436 | 1.318 |
| 152013 | TBC1 domain family, member 10A [Homo sapiens]                    | 2  | 3   | gical process; metabolic process    | 0.740 | 1.435 | 1.588 |
| 187068 | Bruton's tyrosine kinase-associated protein-135 [Homo sapiens]   | 8  | 40  | ic process; response to stimulus    | 0.911 | 1.433 | 1.480 |
| 189054 | unnamed protein product [Homo sapiens]                           | 3  | 3   | regulation of biological process    | 1.295 | 1.430 | 1.496 |
| 183448 | Chain P, Complex Between Pp2a-Specific Methyltransferase Pme-1 A | 5  | 8   |                                     | 1.066 | 1.430 | 1.421 |
| 702076 | unnamed protein product, partial [Homo sapiens]                  | 7  | 32  | regulation of biological process    | 0.971 | 1.429 | 1.476 |
| 625260 | neurochondrin isoform 2 [Homo sapiens]                           | 3  | 5   | regulation of biological process    | 1.064 | 1.428 | 1.420 |
| 767912 | PREDICTED: probable methyltransferase TARBP1 isoform X4 [Hor     | 3  | 7   | gical process; metabolic process    | 0.899 | 1.428 | 1.434 |
| 767903 | PREDICTED: cytochrome P450 4X1 isoform X2 [Homo sapiens]         | 2  | 2   | metabolic process                   | 0.917 | 1.427 | 1.388 |

|        |                                                                                       |    |     |                                         |       |       |       |
|--------|---------------------------------------------------------------------------------------|----|-----|-----------------------------------------|-------|-------|-------|
| 491685 | G3BP [Homo sapiens]                                                                   | 7  | 27  | response to stimulus; metabolic process | 1.243 | 1.427 | 1.213 |
| 932794 | Chain B, Crystal Structure Of Human Notch1 Ankyrin Repeats To 1                       | 3  | 9   |                                         | 1.146 | 1.425 | 1.323 |
| 246594 | COG3 protein [Homo sapiens]                                                           | 2  | 4   | ; regulation of biological process      | 1.115 | 1.423 | 1.382 |
| 150804 | DECR2 protein [Homo sapiens]                                                          | 4  | 14  | metabolic process                       | 0.921 | 1.422 | 1.203 |
| 168032 | grancalcin [Homo sapiens]                                                             | 2  | 8   |                                         | 0.798 | 1.421 | 1.386 |
| 119581 | hCG16955, isoform CRA_b [Homo sapiens]                                                | 2  | 6   | ; regulation of biological process      | 0.877 | 1.421 | 1.613 |
| 820957 | Chain A, Pp2ca                                                                        | 5  | 20  |                                         | 1.082 | 1.420 | 1.148 |
| 158257 | unnamed protein product [Homo sapiens]                                                | 13 | 98  | ization and biogenesis; transport       | 1.044 | 1.420 | 1.244 |
| 194388 | unnamed protein product [Homo sapiens]                                                | 2  | 5   | metabolic process                       | 1.024 | 1.420 | 1.441 |
| 119627 | transmembrane protein 48, isoform CRA_a [Homo sapiens]                                | 6  | 10  | ization and biogenesis; transport       | 1.201 | 1.419 | 1.238 |
| 767930 | PREDICTED: exocyst complex component 1 isoform X7 [Homo sapiens]                      | 3  | 5   | al process; response to stimulus        | 0.921 | 1.418 | 1.209 |
| 119605 | hypothetical protein BC013949, isoform CRA_a [Homo sapiens]                           | 4  | 15  | cell division                           | 1.039 | 1.418 | 1.360 |
| 335989 | 1-phosphatidylinositol 4,5-bisphosphate phosphodiesterase gamma 1 [Homo sapiens]      | 8  | 23  | ; coagulation; defense response         | 1.059 | 1.418 | 1.258 |
| 119609 | mitochondrial ribosomal protein S7, isoform CRA_a [Homo sapiens]                      | 2  | 7   | nd biogenesis; metabolic process        | 0.723 | 1.417 | 1.456 |
| 460417 | Chain A, Crystal Structure And Mechanism Of Activation Of Tbk1                        | 3  | 7   |                                         | 0.994 | 1.417 | 1.201 |
| 119587 | hCG1732248, isoform CRA_b [Homo sapiens]                                              | 2  | 3   |                                         | 0.943 | 1.415 | 1.314 |
| 530373 | PREDICTED: ubiquitin-conjugating enzyme E2 E2 isoform X2 [Homo sapiens]               | 3  | 18  | ; regulation of biological process      | 0.870 | 1.414 | 1.365 |
| 409826 | unnamed protein product, partial [Homo sapiens]                                       | 2  | 12  |                                         | 1.131 | 1.414 | 1.424 |
| 620892 | Etoposide-induced protein 2.4 variant, partial [Homo sapiens]                         | 4  | 10  | ; regulation of biological process      | 0.829 | 1.413 | 1.422 |
| 462557 | Diacylglycerol lipase, beta [Homo sapiens]                                            | 3  | 6   | ss; cell proliferation; coagulation     | 0.913 | 1.413 | 1.161 |
| 189054 | unnamed protein product [Homo sapiens]                                                | 2  | 14  | nd biogenesis; metabolic process        | 1.041 | 1.413 | 1.145 |
| 620890 | Inositol 1,4,5-trisphosphate receptor type 3 variant, partial [Homo sapiens]          | 5  | 9   | cell organization and biogenesis        | 1.010 | 1.412 | 1.316 |
| 119580 | mitogen-activated protein kinase kinase kinase 7 interacting protein 1 [Homo sapiens] | 2  | 3   | bolic process; defense response         | 1.088 | 1.412 | 1.214 |
| 189053 | unnamed protein product [Homo sapiens]                                                | 9  | 175 | n of biological process; transport      | 1.110 | 1.411 | 1.447 |
| 194381 | unnamed protein product [Homo sapiens]                                                | 3  | 25  | ; response to stimulus; transport       | 1.595 | 1.409 | 1.673 |
| 685331 | KIF1A variant protein, partial [Homo sapiens]                                         | 4  | 6   | ent; transport; metabolic process       | 0.839 | 1.408 | 1.333 |
| 190016 | Chain B, Snapshots Of The Rna Processing Factor Scaf8 Bound To Rps27b                 | 2  | 3   |                                         | 0.993 | 1.408 | 1.502 |
| 767968 | PREDICTED: nuclear mitotic apparatus protein 1 isoform X2 [Homo sapiens]              | 53 | 309 | ; cell division; cell differentiation   | 1.004 | 1.407 | 1.326 |
| 194385 | unnamed protein product [Homo sapiens]                                                | 2  | 3   | ; transport; response to stimulus       | 0.833 | 1.407 | 1.484 |
| 119580 | GTP binding protein 1, isoform CRA_a [Homo sapiens]                                   | 2  | 4   | ; regulation of biological process      | 1.154 | 1.406 | 1.499 |
| 119628 | splicing factor, arginine/serine-rich 4, isoform CRA_c [Homo sapiens]                 | 5  | 47  | ; regulation of biological process      | 0.842 | 1.405 | 1.337 |
| 157739 | nucleoside diphosphate-linked moiety X motif 19, mitochondrial protein [Homo sapiens] | 2  | 5   | metabolic process                       | 1.218 | 1.405 | 1.250 |
| 316522 | 39S ribosomal protein L21, mitochondrial isoform d [Homo sapiens]                     | 3  | 6   | cell organization and biogenesis        | 1.041 | 1.405 | 1.353 |
| 109337 | aminopeptidase B, partial [Homo sapiens]                                              | 19 | 109 | metabolic process                       | 1.046 | 1.402 | 1.480 |
| 227611 | unnamed protein product [Homo sapiens]                                                | 3  | 12  | nd biogenesis; defense response         | 0.894 | 1.402 | 1.263 |
| 150108 | JKTBP1delta6 [Homo sapiens]                                                           | 4  | 16  | ; regulation of biological process      | 0.910 | 1.400 | 1.644 |
| 275265 | hypothetical protein, partial [Homo sapiens]                                          | 2  | 7   | ; regulation of biological process      | 0.902 | 1.400 | 1.441 |
| 767962 | PREDICTED: exosome complex component CSL4 isoform X1 [Homo sapiens]                   | 2  | 4   | ; regulation of biological process      | 1.259 | 1.400 | 1.430 |
| 223029 | mothers against decapentaplegic homolog 3 isoform 2 [Homo sapiens]                    | 3  | 7   | nd biogenesis; cell differentiation     | 0.887 | 1.399 | 1.323 |
| 768043 | PREDICTED: protein LCHN isoform X1 [Homo sapiens]                                     | 2  | 6   |                                         | 0.977 | 1.399 | 1.232 |

|        |                                                                                     |    |     |                                                 |       |       |       |
|--------|-------------------------------------------------------------------------------------|----|-----|-------------------------------------------------|-------|-------|-------|
| 119582 | SMAD, mothers against DPP homolog 5 (Drosophila), isoform CRA_A                     | 3  | 4   | response to stimulus; cell differentiation      | 0.983 | 1.398 | 1.228 |
| 194376 | unnamed protein product [Homo sapiens]                                              | 9  | 53  | cellular process; response to stimulus          | 0.983 | 1.397 | 1.454 |
| 400466 | unnamed protein product [Homo sapiens]                                              | 2  | 8   |                                                 | 1.131 | 1.396 | 1.332 |
| 281953 | histone H2A type 2-B [Homo sapiens]                                                 | 4  | 205 | regulation of biological process                | 0.938 | 1.395 | 1.417 |
| 547235 | eukaryotic translation initiation factor 3 subunit J isoform 3 [Homo sapiens]       | 2  | 4   | regulation of biological process                | 1.006 | 1.394 | 1.213 |
| 563888 | beta-centractin, partial [Homo sapiens]                                             | 4  | 9   |                                                 | 1.058 | 1.394 | 1.356 |
| 203282 | Chain A, Crystal Structure Of Snx9px-Bar (230-595), C2221                           | 3  | 8   | cell communication                              | 1.244 | 1.394 | 1.385 |
| 180985 | CpG island protein [Homo sapiens]                                                   | 2  | 4   | metabolic process                               | 0.948 | 1.394 | 1.378 |
| 530410 | PREDICTED: DNA topoisomerase 3-alpha isoform X1 [Homo sapiens]                      | 4  | 7   | cell organization and biogenesis                | 1.183 | 1.393 | 1.160 |
| 119579 | topoisomerase (DNA) III beta, isoform CRA_b [Homo sapiens]                          | 2  | 5   | metabolic process                               | 1.183 | 1.393 | 1.160 |
| 347850 | RPS6 protein, partial [Homo sapiens]                                                | 9  | 66  | response to stimulus; cell differentiation      | 1.159 | 1.392 | 1.359 |
| 119591 | leucine rich repeat containing 47, isoform CRA_a [Homo sapiens]                     | 10 | 30  | metabolic process                               | 1.108 | 1.392 | 1.265 |
| 591196 | hypothetical protein, partial [Homo sapiens]                                        | 5  | 7   | metabolic process                               | 0.881 | 1.392 | 1.252 |
| 170652 | RecName: Full=ATP synthase mitochondrial F1 complex assembly                        | 2  | 7   | cell organization and biogenesis                | 0.892 | 1.391 | 1.313 |
| 149242 | Chain C, Crystal Structure Of The Human Sec23a24A HETERODIMERIC                     | 9  | 148 | transport                                       | 1.194 | 1.390 | 1.399 |
| 194386 | unnamed protein product [Homo sapiens]                                              | 3  | 6   | regulation of biological process                | 0.924 | 1.390 | 1.718 |
| 461496 | embryonal Fyn-associated substrate isoform 3 [Homo sapiens]                         | 5  | 11  | cellular process; response to stimulus          | 0.946 | 1.389 | 1.327 |
| 119568 | arginyl-tRNA synthetase-like, isoform CRA_e [Homo sapiens]                          | 4  | 10  | cell organization and biogenesis                | 0.773 | 1.389 | 1.265 |
| 119570 | nucleolar and coiled-body phosphoprotein 1, isoform CRA_b [Homo sapiens]            | 2  | 7   | cell organization and biogenesis                | 1.010 | 1.389 | 1.362 |
| 194389 | unnamed protein product [Homo sapiens]                                              | 4  | 20  | cell organization and biogenesis                | 1.128 | 1.388 | 1.392 |
| 768004 | PREDICTED: far upstream element-binding protein 2 isoform X2 [Homo sapiens]         | 16 | 107 | regulation of biological process; transport     | 0.942 | 1.388 | 1.409 |
| 194375 | unnamed protein product [Homo sapiens]                                              | 3  | 4   | metabolic process                               | 1.050 | 1.387 | 1.220 |
| 119571 | unc-119 homolog (C. elegans), isoform CRA_b [Homo sapiens]                          | 2  | 5   | cellular process; response to stimulus          | 0.900 | 1.385 | 1.226 |
| 767958 | PREDICTED: far upstream element-binding protein 3 isoform X4 [Homo sapiens]         | 12 | 56  | regulation of biological process                | 0.934 | 1.385 | 1.388 |
| 578839 | PREDICTED: secretory carrier-associated membrane protein 3 isoform 1 [Homo sapiens] | 4  | 36  | transport; response to stimulus                 | 1.048 | 1.384 | 1.236 |
| 194380 | unnamed protein product [Homo sapiens]                                              | 3  | 3   | cellular biogenesis; defense response           | 1.073 | 1.381 | 1.190 |
| 122937 | protein unc-119 homolog B [Homo sapiens]                                            | 2  | 8   | cell organization and biogenesis                | 0.871 | 1.380 | 1.218 |
| 119585 | chromosome 3 open reading frame 60, isoform CRA_c [Homo sapiens]                    | 3  | 8   | cell organization and biogenesis                | 1.070 | 1.379 | 1.119 |
| 264681 | axaa-Pro aminopeptidase 1 isoform 2 [Homo sapiens]                                  | 7  | 17  | metabolic process                               | 0.967 | 1.379 | 1.430 |
| 530414 | PREDICTED: neurogenic locus notch homolog protein 3 isoform X1 [Homo sapiens]       | 8  | 26  | cellular process; response to stimulus          | 1.084 | 1.379 | 1.416 |
| 119607 | aspartate beta-hydroxylase, isoform CRA_e, partial [Homo sapiens]                   | 6  | 18  | cellular process; metabolic process; transport  | 0.828 | 1.379 | 1.485 |
| 767934 | PREDICTED: exocyst complex component 3 isoform X2 [Homo sapiens]                    | 6  | 15  | cellular biogenesis; metabolic process          | 0.906 | 1.378 | 1.355 |
| 697350 | Chain b, Structure Of The Large Ribosomal Subunit From Human                        | 4  | 17  |                                                 | 0.936 | 1.377 | 1.159 |
| 119627 | thyroid hormone receptor associated protein 3, isoform CRA_a [Homo sapiens]         | 4  | 19  | cellular process; response to stimulus          | 0.958 | 1.374 | 1.417 |
| 158258 | unnamed protein product [Homo sapiens]                                              | 3  | 10  | cellular organization and biogenesis; transport | 1.310 | 1.374 | 1.279 |
| 767910 | PREDICTED: retinoblastoma-binding protein 5 isoform X4 [Homo sapiens]               | 3  | 5   | cellular process; response to stimulus          | 0.979 | 1.373 | 1.176 |
| 132790 | EPHB4 protein, partial [Homo sapiens]                                               | 5  | 9   | cellular process; response to stimulus          | 0.889 | 1.373 | 1.407 |
| 119607 | carbonic anhydrase VIII, isoform CRA_a [Homo sapiens]                               | 3  | 4   | cellular process; response to stimulus          | 1.056 | 1.372 | 1.304 |
| 601021 | NOV/plexin-A1 protein, partial [Homo sapiens]                                       | 5  | 10  | transport; cellular component movement          | 0.908 | 1.371 | 1.377 |
| 758136 | protein phosphatase 1B isoform 5 [Homo sapiens]                                     | 4  | 20  | cellular process; response to stimulus          | 1.082 | 1.371 | 1.109 |

|        |                                                                                                      |    |     |                                                 |       |       |       |
|--------|------------------------------------------------------------------------------------------------------|----|-----|-------------------------------------------------|-------|-------|-------|
| 203363 | putative ATP-dependent RNA helicase DHX33 isoform 1 [Homo sapiens]                                   | 3  | 5   | regulation of biological process                | 0.824 | 1.371 | 1.264 |
| 222667 | LIR-D1 precursor [Homo sapiens]                                                                      | 3  | 3   | cell movement; cell proliferation               | 1.064 | 1.370 | 1.205 |
| 767943 | PREDICTED: AT-rich interactive domain-containing protein 1B isoform 1 [Homo sapiens]                 | 2  | 3   | regulation of biological process                | 0.955 | 1.370 | 1.299 |
| 767955 | PREDICTED: glyoxylate reductase/hydroxypyruvate reductase isoform 1 [Homo sapiens]                   | 2  | 25  | cell organization and biogenesis                | 1.047 | 1.370 | 1.197 |
| 163914 | TPA: microtubule-associated protein [Homo sapiens]                                                   | 3  | 5   | cell division; cell death; cell differentiation | 0.928 | 1.368 | 1.215 |
| 534286 | Chain G, Crystal Structure Of Human Nucleosome Core Particle Labeled With Amino Acids [Homo sapiens] | 4  | 206 |                                                 | 0.933 | 1.367 | 1.394 |
| 284226 | CROP protein, partial [Homo sapiens]                                                                 | 3  | 6   | cell biogenesis; metabolic process              | 1.058 | 1.367 | 1.291 |
| 183182 | guanine nucleotide-binding regulatory protein alpha-inhibitory subunit 1 [Homo sapiens]              | 6  | 20  | cell division; cell proliferation; cell cycle   | 1.069 | 1.366 | 1.404 |
| 119604 | dedicator of cytokinesis 6, isoform CRA_c, partial [Homo sapiens]                                    | 6  | 11  | response to stimulus; coagulation               | 0.982 | 1.364 | 1.338 |
| 393021 | Nck-2 [Homo sapiens]                                                                                 | 2  | 2   | cell division; cellular component movement      | 0.848 | 1.364 | 1.321 |
| 119598 | mitochondrial ribosomal protein L47, isoform CRA_c [Homo sapiens]                                    | 2  | 5   | cell organization and biogenesis                | 1.092 | 1.364 | 1.254 |
| 193787 | unnamed protein product [Homo sapiens]                                                               | 3  | 7   | metabolic process                               | 1.021 | 1.364 | 1.232 |
| 270830 | U4/U6 small nuclear ribonucleoprotein hPrp4 [Homo sapiens]                                           | 5  | 10  | metabolic process                               | 1.168 | 1.363 | 1.235 |
| 145843 | SET, partial [Homo sapiens]                                                                          | 5  | 21  | regulation of biological process                | 1.885 | 1.363 | 1.668 |
| 779976 | mercaptopyruvate sulfurtransferase variant, partial [Homo sapiens]                                   | 4  | 17  | cellular process; response to stimulus          | 1.132 | 1.361 | 1.356 |
| 119571 | similar to RIKEN cDNA 0610011N22 [Homo sapiens]                                                      | 3  | 6   |                                                 | 0.947 | 1.359 | 1.367 |
| 642532 | ras-related small GTP binding protein Rab5 [Homo sapiens]                                            | 7  | 86  | cellular process; response to stimulus          | 1.098 | 1.359 | 1.248 |
| 331284 | endophilin-B1 isoform 4 [Homo sapiens]                                                               | 3  | 10  | cell organization and biogenesis                | 0.926 | 1.359 | 1.382 |
| 126548 | Phosphoglucomutase 3 [Homo sapiens]                                                                  | 9  | 44  | metabolic process                               | 1.095 | 1.358 | 1.286 |
| 484254 | Chain D, Structure Of The Signal Recognition Particle Interacting With The Ribosome [Homo sapiens]   | 5  | 11  | cellular process; response to stimulus          | 0.965 | 1.357 | 1.359 |
| 710522 | FAM65A protein, partial [Homo sapiens]                                                               | 3  | 6   | cellular process; response to stimulus          | 0.952 | 1.356 | 1.249 |
| 119620 | splicing factor, arginine/serine-rich 7, 35kDa, isoform CRA_b [Homo sapiens]                         | 5  | 53  | regulation of biological process                | 0.948 | 1.355 | 1.203 |
| 767981 | PREDICTED: N6-adenosine-methyltransferase 70 kDa subunit isoform 1 [Homo sapiens]                    | 2  | 8   | regulation of biological process                | 0.918 | 1.354 | 1.438 |
| 119601 | vesicle transport through interaction with t-SNAREs homolog 1B (unc119) [Homo sapiens]               | 3  | 7   | regulation of biological process                | 0.805 | 1.354 | 1.238 |
| 194384 | unnamed protein product [Homo sapiens]                                                               | 3  | 4   |                                                 | 0.992 | 1.353 | 1.169 |
| 194374 | unnamed protein product [Homo sapiens]                                                               | 8  | 70  | regulation of biological process                | 1.023 | 1.352 | 1.368 |
| 119604 | mitochondrial ribosomal protein L4, isoform CRA_b [Homo sapiens]                                     | 2  | 3   | cell organization and biogenesis                | 0.848 | 1.352 | 1.327 |
| 530381 | PREDICTED: cap-specific mRNA (nucleoside-2'-O-)-methyltransferase [Homo sapiens]                     | 4  | 6   | metabolic process                               | 0.832 | 1.351 | 1.204 |
| 119609 | signal recognition particle 68kDa, isoform CRA_e [Homo sapiens]                                      | 12 | 30  | transport; response to stimulus                 | 1.170 | 1.349 | 1.284 |
| 409770 | unnamed protein product, partial [Homo sapiens]                                                      | 3  | 6   |                                                 | 1.129 | 1.348 | 1.448 |
| 203363 | bcl-2-like protein 11 isoform 2 [Homo sapiens]                                                       | 2  | 5   | cellular process; response to stimulus          | 1.028 | 1.348 | 1.241 |
| 380146 | C11orf2 protein, partial [Homo sapiens]                                                              | 12 | 28  | transport; metabolic process                    | 0.927 | 1.347 | 1.181 |
| 119627 | EBNA1 binding protein 2, isoform CRA_a [Homo sapiens]                                                | 2  | 4   |                                                 | 1.173 | 1.347 | 1.396 |
| 193784 | unnamed protein product [Homo sapiens]                                                               | 2  | 3   | response; response to stimulus                  | 1.035 | 1.347 | 1.182 |
| 620872 | calpastatin isoform a variant, partial [Homo sapiens]                                                | 6  | 9   | cellular process; cell differentiation          | 1.020 | 1.345 | 1.085 |
| 119597 | solute carrier family 25, member 13 (citrin), isoform CRA_b [Homo sapiens]                           | 16 | 61  | transport; response to stimulus                 | 1.045 | 1.345 | 1.355 |
| 140437 | Sorting and assembly machinery component 50 homolog (S. cerevisiae) [Homo sapiens]                   | 8  | 20  | cell biogenesis; metabolic process              | 1.040 | 1.345 | 1.192 |
| 342115 | E6-AP ubiquitin-protein ligase, partial [Homo sapiens]                                               | 2  | 8   | regulation of biological process                | 0.932 | 1.344 | 1.241 |
| 119587 | H2A histone family, member X [Homo sapiens]                                                          | 3  | 197 | regulation of biological process                | 0.938 | 1.342 | 1.384 |
| 534286 | Chain B, Crystal Structure Of Human Prpf4b Kinase Domain In Complex With A Peptide [Homo sapiens]    | 2  | 6   |                                                 | 0.890 | 1.342 | 1.288 |



|        |                                                                                        |    |    |                                               |       |       |       |
|--------|----------------------------------------------------------------------------------------|----|----|-----------------------------------------------|-------|-------|-------|
| 119602 | fuse-binding protein-interacting repressor, isoform CRA_g [Homo sapiens]               | 11 | 42 | of biological process; cell death             | 1.105 | 1.341 | 1.382 |
| 545719 | Chain B, Crystal Structure Of The Trf2-binding Motif Of Slx4 In Complex With Trf2      | 2  | 7  |                                               | 0.991 | 1.341 | 1.299 |
| 119625 | carbonic reductase 4, isoform CRA_b [Homo sapiens]                                     | 2  | 3  | cell organization and biogenesis              | 1.065 | 1.340 | 1.210 |
| 657367 | Chain A, Crystal Structure Of The Pten Tumor Suppressor                                | 3  | 7  | metabolic process                             | 1.000 | 1.338 | 1.452 |
| 392583 | SRA stem-loop-interacting RNA-binding protein, mitochondrial isoform 1                 | 4  | 15 | cell organization and biogenesis              | 0.909 | 1.338 | 1.294 |
| 104367 | unnamed protein product [Homo sapiens]                                                 | 3  | 7  | cellular process; response to stimulus        | 1.042 | 1.337 | 1.247 |
| 178847 | Chain A, Solution Structure Of The Sh2 Domain From Human Crkl                          | 2  | 8  |                                               | 0.899 | 1.336 | 1.129 |
| 338749 | SLC4A2 protein [Homo sapiens]                                                          | 3  | 5  | transport; cellular homeostasis               | 0.851 | 1.335 | 1.363 |
| 111955 | centrosomal protein of 131 kDa isoform b [Homo sapiens]                                | 3  | 4  | component movement; transport                 | 0.947 | 1.335 | 1.478 |
| 663856 | septin-8 isoform f [Homo sapiens]                                                      | 5  | 12 |                                               | 0.976 | 1.334 | 1.201 |
| 440576 | alternative protein SMCR7L [Homo sapiens]                                              | 2  | 6  |                                               | 1.069 | 1.333 | 1.338 |
| 290559 | Chain A, Crystal Structure Of Human MacroD1                                            | 3  | 19 |                                               | 1.097 | 1.332 | 1.206 |
| 119331 | PDZ domain protein 3' variant 4 [Homo sapiens]                                         | 2  | 4  | cellular process; response to stimulus        | 0.790 | 1.332 | 1.269 |
| 416178 | desmoglein 2 [Homo sapiens]                                                            | 4  | 10 | regulation of biological process              | 1.026 | 1.331 | 1.218 |
| 119621 | inositol(myo)-1(or 4)-monophosphatase 2, isoform CRA_c, partial [Homo sapiens]         | 3  | 8  | cellular process; response to stimulus        | 1.184 | 1.331 | 1.208 |
| 546332 | KIAA0216 splice variant 2, partial [Homo sapiens]                                      | 6  | 7  | cellular movement; cell differentiation       | 1.030 | 1.330 | 1.309 |
| 119594 | integrator complex subunit 5 [Homo sapiens]                                            | 3  | 6  | metabolic process                             | 0.885 | 1.330 | 1.432 |
| 194377 | unnamed protein product [Homo sapiens]                                                 | 3  | 42 | regulation of biological process              | 0.898 | 1.329 | 1.316 |
| 768018 | PREDICTED: DNA topoisomerase 1 isoform X2 [Homo sapiens]                               | 8  | 22 | cell division; response to stimulus           | 0.924 | 1.328 | 1.300 |
| 119591 | Rho guanine exchange factor (GEF) 16, isoform CRA_b [Homo sapiens]                     | 8  | 19 | cellular process; cellular component movement | 0.871 | 1.328 | 1.262 |
| 400417 | unnamed protein product, partial [Homo sapiens]                                        | 6  | 50 |                                               | 1.087 | 1.328 | 1.220 |
| 767887 | PREDICTED: rho guanine nucleotide exchange factor 5-like isoform 1 [Homo sapiens]      | 6  | 13 |                                               | 0.878 | 1.327 | 1.341 |
| 104371 | unnamed protein product [Homo sapiens]                                                 | 2  | 2  | regulation of biological process              | 1.069 | 1.327 | 1.478 |
| 728055 | Chain B, Metal Ion And Ligand Binding Of Integrin                                      | 4  | 9  |                                               | 0.829 | 1.326 | 1.176 |
| 119607 | fascin homolog 1, actin-bundling protein (Strongylocentrotus purpuratus)               | 16 | 82 | cellular process; cellular component movement | 1.042 | 1.326 | 1.286 |
| 324929 | medulloblastoma antigen MU-MB-50.205, partial [Homo sapiens]                           | 6  | 27 | cell organization and biogenesis              | 0.902 | 1.325 | 1.216 |
| 544346 | ankyrin repeat and zinc finger domain-containing protein 1 isoform 1 [Homo sapiens]    | 4  | 5  | cellular process; response to stimulus        | 0.933 | 1.325 | 1.289 |
| 119575 | hCG2040192 [Homo sapiens]                                                              | 3  | 6  |                                               | 0.882 | 1.324 | 1.043 |
| 148745 | UNC84A protein [Homo sapiens]                                                          | 4  | 7  | cell organization and biogenesis              | 0.934 | 1.324 | 1.246 |
| 116284 | GTF3C4 protein, partial [Homo sapiens]                                                 | 4  | 7  | regulation of biological process              | 0.973 | 1.323 | 1.195 |
| 530421 | PREDICTED: ribosomal biogenesis protein LAS1L isoform X6 [Homo sapiens]                | 5  | 16 | metabolic process                             | 1.059 | 1.321 | 1.346 |
| 194373 | unnamed protein product [Homo sapiens]                                                 | 2  | 3  | biogenesis; response to stimulus              | 0.850 | 1.321 | 1.275 |
| 768011 | PREDICTED: BTB/POZ domain-containing protein KCTD15 isoform 1 [Homo sapiens]           | 2  | 2  | cell organization and biogenesis              | 0.877 | 1.320 | 1.281 |
| 310900 | unnamed protein product [Homo sapiens]                                                 | 2  | 6  |                                               | 1.035 | 1.320 | 1.249 |
| 194378 | unnamed protein product [Homo sapiens]                                                 | 4  | 14 | biological process; cell differentiation      | 0.969 | 1.320 | 1.322 |
| 119569 | sorting nexin 2, isoform CRA_a [Homo sapiens]                                          | 6  | 21 | cell organization and biogenesis              | 0.855 | 1.319 | 1.161 |
| 767905 | PREDICTED: peflin isoform X4 [Homo sapiens]                                            | 4  | 16 | cellular process; response to stimulus        | 0.826 | 1.319 | 1.234 |
| 119630 | splicing factor, arginine/serine-rich 15, isoform CRA_a [Homo sapiens]                 | 2  | 3  |                                               | 0.946 | 1.319 | 1.247 |
| 119603 | nudix (nucleoside diphosphate linked moiety X)-type motif 21, isoform 1 [Homo sapiens] | 4  | 16 | cell organization and biogenesis              | 1.088 | 1.318 | 1.348 |
| 116919 | prolyl oligopeptidase [Homo sapiens]                                                   | 7  | 15 | metabolic process                             | 1.069 | 1.318 | 1.327 |

|        |                                                                   |    |     |                                     |       |       |       |
|--------|-------------------------------------------------------------------|----|-----|-------------------------------------|-------|-------|-------|
| 530380 | PREDICTED: Ia-related protein 1 isoform X1 [Homo sapiens]         | 6  | 13  | al process; response to stimulus    | 0.930 | 1.317 | 1.290 |
| 119629 | pericentrin (kendrin), isoform CRA_c [Homo sapiens]               | 2  | 5   | logical process; cell proliferation | 0.959 | 1.317 | 1.259 |
| 119580 | X-ray repair complementing defective repair in Chinese hamster ce | 14 | 116 | gical process; defense response     | 1.373 | 1.317 | 1.428 |
| 530398 | PREDICTED: cullin-5 isoform X1 [Homo sapiens]                     | 5  | 22  | ; cellular homeostasis; transport   | 1.188 | 1.316 | 1.182 |
| 119607 | haloacid dehalogenase-like hydrolase domain containing 3, isofor  | 2  | 8   | metabolic process                   | 1.005 | 1.316 | 1.404 |
| 338725 | MTDH protein, partial [Homo sapiens]                              | 2  | 4   | cell organization and biogenesis    | 1.334 | 1.316 | 1.334 |
| 179396 | APEX nuclease (multifunctional DNA repair enzyme) 1 [Homo sapi    | 6  | 34  | al process; cellular homeostasis    | 1.319 | 1.315 | 1.344 |
| 194376 | unnamed protein product [Homo sapiens]                            | 3  | 4   | cell organization and biogenesis    | 0.990 | 1.314 | 1.105 |
| 158256 | unnamed protein product [Homo sapiens]                            | 6  | 13  | metabolic process                   | 0.950 | 1.314 | 1.181 |
| 119582 | Treacher Collins-Franceschetti syndrome 1, isoform CRA_f, partial | 6  | 24  | transport; metabolic process        | 0.832 | 1.313 | 1.350 |
| 130976 | Similar to ribosomal protein L23, partial [Homo sapiens]          | 4  | 30  | ization and biogenesis; transport   | 0.956 | 1.313 | 1.232 |
| 119611 | ring finger protein 2, isoform CRA_a [Homo sapiens]               | 3  | 5   | cell organization and biogenesis    | 1.086 | 1.313 | 1.276 |
| 189033 | L-3-phosphoserine phosphatase [Homo sapiens]                      | 5  | 18  | metabolic process                   | 0.845 | 1.313 | 1.319 |
| 756142 | Chain x, Human Constitutive 20s Proteasome In Complex With Car    | 3  | 41  |                                     | 1.114 | 1.313 | 1.095 |
| 344179 | glycogen debranching enzyme, partial [Homo sapiens]               | 5  | 13  | ic process; response to stimulus    | 0.968 | 1.312 | 1.618 |
| 221043 | unnamed protein product [Homo sapiens]                            | 6  | 12  | ; regulation of biological process  | 0.880 | 1.312 | 1.157 |
| 158255 | unnamed protein product [Homo sapiens]                            | 7  | 21  | us; metabolic process; transport    | 0.906 | 1.312 | 1.298 |
| 767910 | PREDICTED: sorting nexin-27 isoform X5 [Homo sapiens]             | 5  | 15  | al process; response to stimulus    | 0.911 | 1.310 | 1.273 |
| 530390 | PREDICTED: choline transporter-like protein 1 isoform X5 [Homo s  | 4  | 8   | metabolic process; transport        | 0.910 | 1.310 | 1.179 |
| 609412 | Chain A, The Structure Of 1na In Complex With Src T338g           | 9  | 31  |                                     | 1.132 | 1.310 | 1.369 |
| 119600 | myosin ID, isoform CRA_e, partial [Homo sapiens]                  | 13 | 36  | n of biological process; transport  | 1.032 | 1.309 | 1.434 |
| 221045 | unnamed protein product [Homo sapiens]                            | 4  | 16  | cell organization and biogenesis    | 0.925 | 1.308 | 1.265 |
| 338795 | GTF3C5 protein, partial [Homo sapiens]                            | 7  | 9   | bolic process; cell differentiation | 1.004 | 1.307 | 1.208 |
| 119586 | GTPase activating Rap/RanGAP domain-like 1, isoform CRA_a [Ho     | 3  | 7   | regulation of biological process    | 0.846 | 1.307 | 1.322 |
| 409107 | Chain D, Complex Structure 6 Of DaxxH3.3(SUB7)H4                  | 6  | 285 |                                     | 1.047 | 1.307 | 1.257 |
| 530367 | PREDICTED: echinoderm microtubule-associated protein-like 4 iso   | 8  | 22  | cell organization and biogenesis    | 1.080 | 1.306 | 1.332 |
| 100292 | coronin-like protein [Homo sapiens]                               | 4  | 14  | se to stimulus; defense response    | 1.036 | 1.305 | 1.191 |
| 565536 | Chain B, Glycogen Synthase Kinase-3 Beta In Complex With 3-Ind    | 7  | 20  | metabolic process                   | 0.947 | 1.305 | 1.199 |
| 311893 | copine-1 isoform c [Homo sapiens]                                 | 9  | 28  | esponse to stimulus; cell growth    | 1.076 | 1.305 | 1.305 |
| 193785 | unnamed protein product [Homo sapiens]                            | 19 | 71  | cell organization and biogenesis    | 0.964 | 1.303 | 1.241 |
| 264543 | CHD3 [Homo sapiens]                                               | 9  | 21  | regulation of biological process    | 1.176 | 1.303 | 1.332 |
| 767945 | PREDICTED: IanC-like protein 2 isoform X1 [Homo sapiens]          | 2  | 8   | ; regulation of biological process  | 1.180 | 1.303 | 1.357 |
| 119627 | splicing factor 3a, subunit 3, 60kDa, isoform CRA_b [Homo sapien  | 3  | 17  | cell organization and biogenesis    | 0.857 | 1.303 | 1.138 |
| 148753 | RCC2 protein, partial [Homo sapiens]                              | 18 | 98  | sponse to stimulus; cell division   | 1.161 | 1.302 | 1.288 |
| 768021 | PREDICTED: proteasome assembly chaperone 1 isoform X1 [Homo       | 3  | 9   | cell organization and biogenesis    | 1.059 | 1.300 | 1.161 |
| 767906 | PREDICTED: F-actin-capping protein subunit alpha-1 isoform X1 [H  | 5  | 47  | ; regulation of biological process  | 1.091 | 1.299 | 1.314 |
| 530395 | PREDICTED: solute carrier family 22 member 18 isoform X9 [Homo    | 2  | 3   | transport                           | 1.276 | 1.297 | 1.252 |
| 119574 | pyrophosphatase (inorganic) 1, isoform CRA_a [Homo sapiens]       | 3  | 15  | metabolic process                   | 1.067 | 1.297 | 1.444 |
| 166014 | enabled-like protein variant hMenaDv6 [Homo sapiens]              | 7  | 38  | al process; response to stimulus    | 0.926 | 1.297 | 1.264 |
| 578803 | PREDICTED: heterogeneous nuclear ribonucleoprotein A3 isoform     | 9  | 46  | metabolic process; transport        | 1.272 | 1.296 | 1.741 |

|        |                                                                                                 |     |     |                                                    |       |       |       |
|--------|-------------------------------------------------------------------------------------------------|-----|-----|----------------------------------------------------|-------|-------|-------|
| 119613 | HECT, UBA and WWE domain containing 1, isoform CRA_a [Homo sapiens]                             | 49  | 176 | cell proliferation; cell differentiation           | 0.955 | 1.295 | 1.240 |
| 530396 | PREDICTED: double-strand break repair protein MRE11A isoform X1 [Homo sapiens]                  | 2   | 10  | cell proliferation; defense response               | 1.095 | 1.295 | 1.309 |
| 152149 | Chain A, Human Nsun5 Protein                                                                    | 3   | 6   |                                                    | 1.062 | 1.294 | 1.283 |
| 482570 | CTNND1 protein, partial [Homo sapiens]                                                          | 16  | 54  | cell organization and biogenesis                   | 0.989 | 1.294 | 1.339 |
| 126979 | KIAA1699 protein, partial [Homo sapiens]                                                        | 10  | 36  | cellular homeostasis; transport; metabolic process | 1.024 | 1.293 | 1.358 |
| 119588 | lin-7 homolog C (C. elegans), isoform CRA_b [Homo sapiens]                                      | 2   | 5   | cell organization and biogenesis                   | 1.047 | 1.293 | 1.026 |
| 119623 | chromosome 6 open reading frame 134, isoform CRA_c, partial [Homo sapiens]                      | 2   | 4   | cellular homeostasis; metabolic process            | 0.912 | 1.293 | 1.299 |
| 119589 | transmembrane protein 41B, isoform CRA_d, partial [Homo sapiens]                                | 3   | 8   |                                                    | 0.798 | 1.292 | 1.244 |
| 119390 | Chain A, Crystal Structure Of The Heterodimeric Complex Of Human Junctional Adhesion Molecule 1 | 6   | 25  | cellular homeostasis; response to stimulus         | 1.008 | 1.290 | 1.287 |
| 297266 | Chain B, Crystal Structure Of Human Junctional Adhesion Molecule 1                              | 5   | 26  |                                                    | 0.851 | 1.290 | 1.146 |
| 768036 | PREDICTED: mediator of RNA polymerase II transcription subunit 1 [Homo sapiens]                 | 3   | 5   | cellular homeostasis; response to stimulus         | 1.091 | 1.290 | 1.174 |
| 331508 | MSIN3A [Homo sapiens]                                                                           | 11  | 28  | response to stimulus; cellular homeostasis         | 0.948 | 1.288 | 1.268 |
| 768000 | PREDICTED: ATP-dependent RNA helicase DDX39A isoform X1 [Homo sapiens]                          | 14  | 122 | regulation of biological process                   | 1.048 | 1.288 | 1.178 |
| 231110 | RNA-binding protein 10 isoform 2 [Homo sapiens]                                                 | 4   | 18  | metabolic process                                  | 0.891 | 1.287 | 1.266 |
| 767903 | PREDICTED: uncharacterized protein C1orf167 isoform X8 [Homo sapiens]                           | 2   | 4   |                                                    | 0.838 | 1.287 | 1.333 |
| 556695 | nucleoside diphosphate kinase, mitochondrial isoform b [Homo sapiens]                           | 3   | 13  | regulation of biological process                   | 1.079 | 1.287 | 1.253 |
| 530379 | PREDICTED: ATP-dependent RNA helicase DHX29 isoform X3 [Homo sapiens]                           | 5   | 10  | metabolic process                                  | 0.998 | 1.286 | 1.213 |
| 318744 | hypothetical protein [Homo sapiens]                                                             | 2   | 8   | metabolic process                                  | 0.945 | 1.286 | 1.249 |
| 448295 | TLS protein                                                                                     | 6   | 19  |                                                    | 1.073 | 1.286 | 1.036 |
| 400470 | unnamed protein product [Homo sapiens]                                                          | 2   | 7   |                                                    | 0.877 | 1.286 | 1.232 |
| 520783 | USP19 protein, partial [Homo sapiens]                                                           | 4   | 7   | cellular homeostasis; response to stimulus         | 0.892 | 1.286 | 1.159 |
| 704416 | elongation factor Tu [Homo sapiens]                                                             | 11  | 152 | cell organization and biogenesis                   | 1.045 | 1.286 | 1.334 |
| 119577 | ethylmalonic encephalopathy 1, isoform CRA_b [Homo sapiens]                                     | 4   | 24  | metabolic process                                  | 1.042 | 1.285 | 1.233 |
| 211939 | Chain H, Crystal Structure Of Zn2+-Bound Form Of Des3-23alg-2                                   | 4   | 19  |                                                    | 1.137 | 1.285 | 1.383 |
| 119610 | transmembrane protein 93 [Homo sapiens]                                                         | 2   | 3   | cellular homeostasis; metabolic process            | 0.988 | 1.285 | 1.401 |
| 578800 | PREDICTED: melanoma inhibitory activity protein 3 isoform X2 [Homo sapiens]                     | 6   | 17  | cellular homeostasis; response to stimulus         | 0.958 | 1.285 | 1.205 |
| 388326 | Chain A, Discovery Of Small Molecules That Bind To K-Ras And Inhibit Its Activity               | 4   | 10  |                                                    | 0.892 | 1.284 | 1.287 |
| 189217 | maspardin isoform b [Homo sapiens]                                                              | 2   | 6   | cellular homeostasis; response to stimulus         | 0.826 | 1.284 | 1.106 |
| 193785 | unnamed protein product [Homo sapiens]                                                          | 2   | 2   | regulation of biological process                   | 0.876 | 1.284 | 1.155 |
| 767972 | PREDICTED: bromodomain adjacent to zinc finger domain protein 1 [Homo sapiens]                  | 3   | 4   | cell organization and biogenesis                   | 1.081 | 1.284 | 1.294 |
| 161692 | a member of the short-chain alcohol dehydrogenase family, partial [Homo sapiens]                | 3   | 10  | metabolic process                                  | 0.834 | 1.283 | 1.166 |
| 352297 | Trio [Homo sapiens]                                                                             | 4   | 12  | cellular homeostasis; cellular component movement  | 0.855 | 1.282 | 1.300 |
| 119583 | voltage-dependent anion channel 3, isoform CRA_b [Homo sapiens]                                 | 11  | 64  | regulation of biological process                   | 1.102 | 1.282 | 1.191 |
| 251837 | Chain B, Leishmania Tarentolae Mitochondrial Large Ribosomal Subunit                            | 2   | 6   | metabolic process                                  | 0.922 | 1.281 | 1.236 |
| 119598 | EPH receptor B3, isoform CRA_a [Homo sapiens]                                                   | 4   | 10  | cell organization and biogenesis                   | 1.062 | 1.280 | 1.323 |
| 314172 | ASPSCR1 protein [Homo sapiens]                                                                  | 6   | 22  | cell organization and biogenesis                   | 0.970 | 1.280 | 1.164 |
| 476074 | plectin isoform 1c [Homo sapiens]                                                               | 138 | 721 | cell organization and biogenesis                   | 1.016 | 1.280 | 1.256 |
| 584277 | receptor tyrosine-protein kinase erbB-2 isoform d precursor [Homo sapiens]                      | 5   | 9   | response to stimulus; cell differentiation         | 0.959 | 1.279 | 1.180 |
| 158259 | unnamed protein product [Homo sapiens]                                                          | 5   | 22  | metabolic process                                  | 0.904 | 1.278 | 1.252 |
| 101206 | Chain B, L-3-Hydroxyacyl-Coa Dehydrogenase Complexed With Acetyl-Coa                            | 9   | 46  | metabolic process                                  | 1.271 | 1.276 | 1.330 |

|        |                                                                                                             |    |     |                                                     |       |       |       |
|--------|-------------------------------------------------------------------------------------------------------------|----|-----|-----------------------------------------------------|-------|-------|-------|
| 119631 | dynein, cytoplasmic 1, intermediate chain 2, isoform CRA_a [Homo sapiens]                                   | 5  | 26  | cell movement; metabolic process                    | 1.184 | 1.276 | 1.248 |
| 159149 | DIS3 [Homo sapiens]                                                                                         | 11 | 30  | regulation of biological process                    | 1.114 | 1.276 | 1.268 |
| 119629 | protein O-fucosyltransferase 2, isoform CRA_c [Homo sapiens]                                                | 2  | 5   | regulation of biological process                    | 0.978 | 1.276 | 1.372 |
| 530425 | PREDICTED: phosphatidate phosphatase LPIN2 isoform X1 [Homo sapiens]                                        | 2  | 2   | regulation of biological process                    | 0.762 | 1.275 | 1.142 |
| 229080 | DNA repair enzyme                                                                                           | 2  | 4   | cellular process; response to stimulus              | 1.025 | 1.275 | 1.151 |
| 194387 | unnamed protein product [Homo sapiens]                                                                      | 4  | 15  | regulation of biological process                    | 1.018 | 1.274 | 1.510 |
| 629888 | unknown, partial [Homo sapiens]                                                                             | 34 | 159 | cell movement; defense response                     | 1.048 | 1.273 | 1.281 |
| 119606 | chromosome 16 open reading frame 34, isoform CRA_d [Homo sapiens]                                           | 2  | 9   |                                                     | 0.821 | 1.272 | 1.270 |
| 386783 | Chain B, Crystal Structure Of A Ribonucleotide Reductase M2 B (ribonucleotide reductase M2B chain B)        | 2  | 5   |                                                     | 0.881 | 1.272 | 1.182 |
| 194374 | unnamed protein product [Homo sapiens]                                                                      | 4  | 21  | metabolic process                                   | 1.211 | 1.272 | 1.376 |
| 119607 | inositol(myo)-1(or 4)-monophosphatase 1, isoform CRA_d [Homo sapiens]                                       | 4  | 12  | cellular process; response to stimulus              | 0.934 | 1.271 | 1.210 |
| 119576 | WD repeat domain 70, isoform CRA_a [Homo sapiens]                                                           | 3  | 7   |                                                     | 0.926 | 1.271 | 1.233 |
| 194379 | unnamed protein product [Homo sapiens]                                                                      | 6  | 17  | metabolic process                                   | 1.161 | 1.270 | 1.251 |
| 119610 | hCG32973, isoform CRA_b [Homo sapiens]                                                                      | 2  | 6   | proliferation; metabolic process                    | 0.935 | 1.270 | 1.086 |
| 189055 | unnamed protein product [Homo sapiens]                                                                      | 4  | 12  | cell organization and biogenesis                    | 1.028 | 1.270 | 1.301 |
| 119596 | protein O-fucosyltransferase 1, isoform CRA_b [Homo sapiens]                                                | 2  | 5   | cellular process; response to stimulus              | 1.075 | 1.269 | 1.358 |
| 152772 | putative ATP-dependent RNA helicase [Homo sapiens]                                                          | 14 | 139 | regulation of biological process                    | 1.039 | 1.268 | 1.164 |
| 332864 | pyruvate kinase PKM isoform b [Homo sapiens]                                                                | 26 | 445 | cellular process; metabolic process; cell death     | 1.105 | 1.268 | 1.272 |
| 119574 | mitogen-activated protein kinase 9, isoform CRA_d [Homo sapiens]                                            | 2  | 4   | cellular process; transport; defense response       | 1.176 | 1.268 | 1.229 |
| 119577 | heterogeneous nuclear ribonucleoprotein L, isoform CRA_a [Homo sapiens]                                     | 14 | 58  | metabolic process                                   | 0.917 | 1.267 | 1.295 |
| 189054 | unnamed protein product [Homo sapiens]                                                                      | 3  | 5   | metabolic process                                   | 0.950 | 1.267 | 1.088 |
| 227612 | unnamed protein product [Homo sapiens]                                                                      | 7  | 15  | cellular process; metabolic process; cell death     | 1.039 | 1.267 | 1.251 |
| 194382 | unnamed protein product [Homo sapiens]                                                                      | 7  | 45  | proliferation; response to stimulus                 | 0.968 | 1.267 | 1.217 |
| 158260 | unnamed protein product [Homo sapiens]                                                                      | 6  | 21  | metabolic process                                   | 0.917 | 1.267 | 1.302 |
| 119575 | ribosomal protein S24, isoform CRA_i [Homo sapiens]                                                         | 2  | 9   | cell organization and biogenesis; transport         | 1.470 | 1.267 | 1.168 |
| 119609 | hCG1642326, isoform CRA_a [Homo sapiens]                                                                    | 2  | 3   | metabolic process                                   | 1.018 | 1.265 | 1.197 |
| 702191 | unnamed protein product [Homo sapiens]                                                                      | 2  | 12  | cellular process; metabolic process; transport      | 0.891 | 1.265 | 1.158 |
| 409760 | unnamed protein product, partial [Homo sapiens]                                                             | 3  | 4   |                                                     | 1.216 | 1.265 | 1.322 |
| 274369 | lamin isoform A [Homo sapiens]                                                                              | 33 | 337 | cellular process; transport; metabolic process      | 1.084 | 1.265 | 1.250 |
| 526260 | hypothetical protein, partial [Homo sapiens]                                                                | 4  | 5   | cell organization and biogenesis; metabolic process | 1.041 | 1.264 | 1.353 |
| 767958 | PREDICTED: protein transport protein Sec16A isoform X12 [Homo sapiens]                                      | 11 | 53  | cell organization and biogenesis; metabolic process | 0.956 | 1.264 | 1.155 |
| 189053 | unnamed protein product [Homo sapiens]                                                                      | 10 | 55  | cell organization and biogenesis                    | 1.095 | 1.263 | 1.226 |
| 189065 | unnamed protein product [Homo sapiens]                                                                      | 5  | 27  | response to stimulus; metabolic process             | 0.989 | 1.263 | 1.239 |
| 626302 | unknown, partial [Homo sapiens]                                                                             | 10 | 37  | metabolic process                                   | 0.980 | 1.263 | 1.248 |
| 158256 | unnamed protein product [Homo sapiens]                                                                      | 3  | 5   | metabolic process                                   | 0.794 | 1.262 | 1.131 |
| 424026 | KIAA0887 protein, partial [Homo sapiens]                                                                    | 6  | 29  | regulation of biological process                    | 1.133 | 1.262 | 1.195 |
| 214660 | Chain A, Crystal Structure Of The Mitochondrial Serine Protease H (mitochondrial serine protease H chain A) | 6  | 14  | metabolic process                                   | 1.135 | 1.262 | 1.194 |
| 767922 | PREDICTED: probable leucine--tRNA ligase, mitochondrial isoform 1 [Homo sapiens]                            | 3  | 11  | regulation of biological process                    | 1.069 | 1.262 | 1.095 |
| 119626 | fucose-1-phosphate guanylyltransferase [Homo sapiens]                                                       | 2  | 3   | metabolic process                                   | 1.024 | 1.261 | 1.141 |
| 279003 | unnamed protein product [Homo sapiens]                                                                      | 3  | 16  |                                                     | 0.830 | 1.261 | 1.199 |



|        |                                                                                         |    |     |                                    |       |       |       |
|--------|-----------------------------------------------------------------------------------------|----|-----|------------------------------------|-------|-------|-------|
| 214386 | unnamed protein product [Homo sapiens]                                                  | 16 | 62  |                                    | 1.128 | 1.260 | 1.263 |
| 335188 | stromal RNA regulating factor [Homo sapiens]                                            | 5  | 15  | regulation of biological process   | 0.890 | 1.260 | 1.344 |
| 119574 | chromosome 10 open reading frame 22, isoform CRA_b [Homo sapiens]                       | 2  | 2   | metabolic process                  | 0.792 | 1.260 | 1.121 |
| 119626 | hCG2031840, isoform CRA_d [Homo sapiens]                                                | 4  | 10  | metabolic process                  | 1.148 | 1.260 | 1.072 |
| 314555 | putative MAPK activating protein [Homo sapiens]                                         | 4  | 12  | cell organization and biogenesis   | 0.834 | 1.259 | 1.307 |
| 261278 | Chain D, Human Dipeptidyl Peptidase Dpp7                                                | 10 | 38  | metabolic process                  | 1.016 | 1.259 | 1.209 |
| 487629 | huntingtin-interacting protein 1-related protein isoform 1 [Homo sapiens]               | 10 | 30  | biogenesis; transport; cell death  | 0.911 | 1.259 | 1.135 |
| 119606 | KIAA0683 gene product, isoform CRA_a [Homo sapiens]                                     | 4  | 9   | regulation of biological process   | 0.936 | 1.258 | 1.279 |
| 159795 | Chain A, The Structure Of Receptor-Associated Protein(Rap)                              | 2  | 7   |                                    | 0.788 | 1.258 | 1.133 |
| 192637 | Similar to cytoskeleton-associated protein 4, partial [Homo sapiens]                    | 16 | 65  | metabolic process                  | 1.095 | 1.258 | 1.382 |
| 767912 | PREDICTED: CSC1-like protein 1 isoform X2 [Homo sapiens]                                | 3  | 7   | transport                          | 0.990 | 1.258 | 1.196 |
| 189069 | unnamed protein product [Homo sapiens]                                                  | 3  | 11  | cell organization and biogenesis   | 0.875 | 1.258 | 1.306 |
| 300647 | unnamed protein product [Homo sapiens]                                                  | 4  | 9   |                                    | 1.147 | 1.257 | 1.157 |
| 697351 | Chain B, Methyltransferase Domain Of C9orf114                                           | 2  | 6   |                                    | 0.976 | 1.257 | 1.151 |
| 639911 | unknown, partial [Homo sapiens]                                                         | 5  | 18  | ion and biogenesis; cell division  | 0.942 | 1.257 | 1.259 |
| 119612 | family with sequence similarity 84, member B [Homo sapiens]                             | 2  | 5   |                                    | 0.836 | 1.256 | 1.144 |
| 768031 | PREDICTED: plexin-B2 isoform X1 [Homo sapiens]                                          | 10 | 19  | s; development; cell proliferation | 0.922 | 1.256 | 1.193 |
| 408536 | Chain D, Pkm2 In Complex With An Activator                                              | 29 | 463 |                                    | 1.123 | 1.256 | 1.255 |
| 767908 | PREDICTED: SLIT-ROBO Rho GTPase-activating protein 2 isoform X1                         | 3  | 8   | ment movement; cell proliferation  | 0.880 | 1.255 | 1.171 |
| 189069 | unnamed protein product [Homo sapiens]                                                  | 15 | 63  | meostasis; response to stimulus    | 1.076 | 1.254 | 1.143 |
| 189308 | nucleobindin [Homo sapiens]                                                             | 9  | 46  | ; regulation of biological process | 1.287 | 1.254 | 1.313 |
| 238624 | neuroplastin isoform d precursor [Homo sapiens]                                         | 2  | 4   | homeostasis; metabolic process     | 1.077 | 1.253 | 1.428 |
| 119612 | Rtf1, Paf1/RNA polymerase II complex component, homolog (S. cerevisiae)                 | 3  | 7   | cell organization and biogenesis   | 0.882 | 1.253 | 1.168 |
| 189053 | unnamed protein product [Homo sapiens]                                                  | 2  | 13  | cell organization and biogenesis   | 0.806 | 1.252 | 1.126 |
| 158256 | unnamed protein product [Homo sapiens]                                                  | 13 | 142 | cell organization and biogenesis   | 1.074 | 1.252 | 1.266 |
| 119624 | hCG42063, isoform CRA_a, partial [Homo sapiens]                                         | 7  | 28  |                                    | 1.083 | 1.251 | 1.322 |
| 189053 | unnamed protein product [Homo sapiens]                                                  | 4  | 15  | ization and biogenesis; transport  | 0.914 | 1.250 | 1.298 |
| 158259 | unnamed protein product [Homo sapiens]                                                  | 8  | 37  |                                    | 1.010 | 1.250 | 1.089 |
| 767978 | PREDICTED: succinyl-CoA ligase [ADP-forming] subunit beta, mitochondrial                | 3  | 5   | metabolic process                  | 1.156 | 1.249 | 1.342 |
| 767911 | PREDICTED: acyl-CoA:lysophosphatidylglycerol acyltransferase 1                          | 2  | 2   | metabolic process                  | 0.965 | 1.249 | 1.296 |
| 555943 | general transcription factor 3C polypeptide 1 isoform 2 [Homo sapiens]                  | 14 | 24  | metabolic process                  | 0.953 | 1.247 | 1.182 |
| 557786 | TBC1 domain family member 4 isoform 3 [Homo sapiens]                                    | 5  | 21  | cell organization and biogenesis   | 0.823 | 1.247 | 1.155 |
| 157835 | Chain B, Crystal Structure Of Nfkb, Irf7, Irf3 Bound To The Interferon Gamma Receptor 1 | 3  | 4   | regulation of biological process   | 1.289 | 1.247 | 1.158 |
| 193787 | unnamed protein product [Homo sapiens]                                                  | 3  | 7   | ; regulation of biological process | 0.870 | 1.245 | 1.173 |
| 119580 | RNA binding motif protein 9, isoform CRA_c [Homo sapiens]                               | 2  | 5   | cell organization and biogenesis   | 1.616 | 1.245 | 1.245 |
| 530409 | PREDICTED: mitochondrial Rho GTPase 2 isoform X3 [Homo sapiens]                         | 8  | 13  | cell organization and biogenesis   | 0.881 | 1.245 | 1.231 |
| 820957 | Chain B, Crystal Structure Of Human Fmnl2 Gbd-fh3 Domains Bound To Fhl2                 | 2  | 5   |                                    | 0.922 | 1.245 | 1.168 |
| 767903 | PREDICTED: ubiquitin carboxyl-terminal hydrolase 24 isoform X2 [Homo sapiens]           | 8  | 12  | ; regulation of biological process | 0.886 | 1.245 | 1.108 |
| 194377 | unnamed protein product [Homo sapiens]                                                  | 2  | 3   | cell organization and biogenesis   | 0.839 | 1.244 | 1.178 |
| 146034 | Ribosomal protein L28 [Homo sapiens]                                                    | 7  | 54  | ; regulation of biological process | 0.903 | 1.244 | 1.145 |

|        |                                                                                            |    |     |                                             |       |       |       |
|--------|--------------------------------------------------------------------------------------------|----|-----|---------------------------------------------|-------|-------|-------|
| 530423 | PREDICTED: casein kinase II subunit alpha' isoform X1 [Homo sapiens]                       | 2  | 5   | movement; response to stimulus              | 1.017 | 1.244 | 1.180 |
| 767957 | PREDICTED: heterogeneous nuclear ribonucleoprotein K isoform X1 [Homo sapiens]             | 16 | 304 | cellular process; response to stimulus      | 1.090 | 1.244 | 1.259 |
| 106731 | inositol-1,4,5-trisphosphate 5-phosphatase (EC 3.1.3.56) - human (Homo sapiens)            | 2  | 2   | cellular process; response to stimulus      | 0.937 | 1.243 | 1.128 |
| 221041 | unnamed protein product [Homo sapiens]                                                     | 2  | 6   |                                             | 0.976 | 1.242 | 1.045 |
| 119612 | oxidation resistance 1, isoform CRA_c [Homo sapiens]                                       | 2  | 3   | regulation of biological process            | 0.848 | 1.241 | 1.457 |
| 119594 | transmembrane 7 superfamily member 2, isoform CRA_a [Homo sapiens]                         | 5  | 25  | metabolic process                           | 0.992 | 1.240 | 1.122 |
| 578823 | PREDICTED: 5'-AMP-activated protein kinase subunit gamma-1 isoform X1 [Homo sapiens]       | 4  | 8   | response to stimulus; cell communication    | 1.070 | 1.239 | 1.229 |
| 347855 | REEP3 protein, partial [Homo sapiens]                                                      | 2  | 4   | cell division and biogenesis; cell division | 0.783 | 1.239 | 1.131 |
| 620882 | metastasis associated protein variant, partial [Homo sapiens]                              | 9  | 34  | regulation of biological process            | 0.920 | 1.237 | 1.239 |
| 194384 | unnamed protein product [Homo sapiens]                                                     | 8  | 21  | transport; response to stimulus             | 1.113 | 1.236 | 1.112 |
| 158258 | unnamed protein product [Homo sapiens]                                                     | 4  | 9   |                                             | 0.870 | 1.236 | 1.217 |
| 767951 | PREDICTED: cell cycle and apoptosis regulator protein 2 isoform X1 [Homo sapiens]          | 13 | 57  | cell organization and biogenesis            | 1.063 | 1.235 | 1.144 |
| 119606 | STIP1 homology and U-box containing protein 1, isoform CRA_c [Homo sapiens]                | 7  | 37  | regulation of biological process            | 1.149 | 1.235 | 1.241 |
| 767938 | PREDICTED: clathrin interactor 1 isoform X3 [Homo sapiens]                                 | 2  | 2   | cell organization and biogenesis            | 0.888 | 1.235 | 1.086 |
| 119594 | inner centromere protein antigens 135/155kDa, isoform CRA_a [Homo sapiens]                 | 2  | 2   | cellular process; response to stimulus      | 0.863 | 1.233 | 1.128 |
| 119597 | cytochrome P450, family 51, subfamily A, polypeptide 1, isoform C1 [Homo sapiens]          | 5  | 17  | metabolic process                           | 0.918 | 1.233 | 1.086 |
| 767956 | PREDICTED: constitutive coactivator of PPAR-gamma-like protein 1 isoform X1 [Homo sapiens] | 17 | 48  |                                             | 0.986 | 1.233 | 1.236 |
| 685174 | MAP kinase kinase 3 [Homo sapiens]                                                         | 5  | 13  | metabolic process; defense response         | 1.008 | 1.233 | 1.282 |
| 119602 | plectin 1, intermediate filament binding protein 500kDa, isoform C1 [Homo sapiens]         | 92 | 474 | cell organization and biogenesis            | 1.019 | 1.233 | 1.212 |
| 189065 | unnamed protein product [Homo sapiens]                                                     | 2  | 9   | cell organization and biogenesis            | 1.041 | 1.233 | 1.306 |
| 767958 | PREDICTED: polypyrimidine tract-binding protein 3 isoform X3 [Homo sapiens]                | 6  | 29  | regulation of biological process            | 1.265 | 1.232 | 1.260 |
| 468067 | CGI-16 protein [Homo sapiens]                                                              | 3  | 9   | metabolic process                           | 1.110 | 1.232 | 1.159 |
| 543039 | peroxiredoxin 6, partial [Homo sapiens]                                                    | 4  | 49  | response to stimulus; metabolic process     | 1.049 | 1.231 | 1.317 |
| 119625 | spermatogenesis associated 5, isoform CRA_a [Homo sapiens]                                 | 2  | 10  | development; cell differentiation           | 0.994 | 1.230 | 1.327 |
| 475864 | kinesin-1 heavy chain [Homo sapiens]                                                       | 16 | 62  | regulation of biological process            | 1.007 | 1.230 | 1.274 |
| 119610 | SUMO1/sentrin/SMT3 specific peptidase 3, isoform CRA_c [Homo sapiens]                      | 3  | 4   | metabolic process                           | 0.959 | 1.230 | 1.179 |
| 118600 | NUP43 protein, partial [Homo sapiens]                                                      | 4  | 24  | stimulus; transport; cell division          | 0.911 | 1.229 | 1.294 |
| 380692 | probable ATP-dependent RNA helicase DDX56 isoform 2 [Homo sapiens]                         | 2  | 4   | metabolic process                           | 0.884 | 1.228 | 1.148 |
| 767912 | PREDICTED: adenylosuccinate synthetase isozyme 2 isoform X2 [Homo sapiens]                 | 3  | 7   | cellular process; response to stimulus      | 0.861 | 1.227 | 1.135 |
| 193786 | unnamed protein product [Homo sapiens]                                                     | 2  | 3   | cell organization and biogenesis            | 0.789 | 1.227 | 1.230 |
| 119596 | nuclear receptor coactivator 5, isoform CRA_c [Homo sapiens]                               | 8  | 29  | regulation of biological process            | 1.090 | 1.227 | 1.223 |
| 119600 | Ras homolog gene family, member T1, isoform CRA_f [Homo sapiens]                           | 2  | 2   | cell organization and biogenesis            | 1.008 | 1.227 | 1.194 |
| 238427 | Porin 31HM [human, skeletal muscle membranes, Peptide, 282 aa]                             | 10 | 46  | regulation of biological process            | 1.064 | 1.227 | 1.251 |
| 119608 | spectrin, alpha, non-erythrocytic 1 (alpha-fodrin), isoform CRA_c [Homo sapiens]           | 50 | 227 | cell movement; defense response             | 1.005 | 1.226 | 1.217 |
| 158261 | unnamed protein product [Homo sapiens]                                                     | 2  | 5   | regulation of biological process            | 0.825 | 1.226 | 1.065 |
| 194381 | unnamed protein product [Homo sapiens]                                                     | 4  | 12  |                                             | 0.970 | 1.226 | 1.193 |
| 119593 | host cell factor C1 (VP16-accessory protein), isoform CRA_c [Homo sapiens]                 | 19 | 56  | cellular process; response to stimulus      | 0.981 | 1.226 | 1.178 |
| 194377 | unnamed protein product [Homo sapiens]                                                     | 2  | 5   | metabolic process; transport                | 0.807 | 1.226 | 1.101 |
| 193786 | unnamed protein product [Homo sapiens]                                                     | 3  | 4   |                                             | 1.110 | 1.226 | 1.186 |
| 731186 | TSC1-PDGFRB fusion protein, partial [Homo sapiens]                                         | 2  | 4   | cellular process; response to stimulus      | 0.932 | 1.225 | 0.989 |

|        |                                                                           |    |    |                                                    |       |       |       |
|--------|---------------------------------------------------------------------------|----|----|----------------------------------------------------|-------|-------|-------|
| 378792 | Chain D, Contribution Of The First K-homology Domain Of Poly(c)-          | 3  | 5  |                                                    | 1.154 | 1.224 | 1.210 |
| 119572 | hCG2039634, isoform CRA_e [Homo sapiens]                                  | 10 | 25 | regulation of biological process                   | 1.114 | 1.224 | 1.233 |
| 117407 | G alpha-q [Homo sapiens]                                                  | 3  | 9  | ; coagulation; metabolic process                   | 0.910 | 1.224 | 1.234 |
| 530420 | PREDICTED: protein NipSnap homolog 1 isoform X1 [Homo sapiens]            | 3  | 22 |                                                    | 1.112 | 1.224 | 1.086 |
| 530374 | PREDICTED: U2 snRNP-associated SURP motif-containing protein              | 4  | 10 | metabolic process                                  | 0.866 | 1.224 | 1.155 |
| 530418 | PREDICTED: nuclear receptor coactivator 5 isoform X1 [Homo sapiens]       | 8  | 32 | ; regulation of biological process                 | 1.030 | 1.224 | 1.228 |
| 104382 | unnamed protein product [Homo sapiens]                                    | 2  | 4  | transport                                          | 0.933 | 1.223 | 1.215 |
| 135436 | ATP synthase, H+ transporting, mitochondrial F0 complex, subunit c        | 9  | 44 | metabolic process; transport                       | 1.097 | 1.223 | 1.142 |
| 390980 | Chain A, Solution Nmr Structure Of The Globular Domain Of Human           | 3  | 8  |                                                    | 0.896 | 1.223 | 1.446 |
| 273709 | PRPF38B protein, partial [Homo sapiens]                                   | 2  | 3  | metabolic process                                  | 0.788 | 1.222 | 1.268 |
| 158254 | unnamed protein product [Homo sapiens]                                    | 6  | 24 | metabolic process                                  | 1.147 | 1.222 | 1.087 |
| 119617 | poly(rC) binding protein 2, isoform CRA_f [Homo sapiens]                  | 7  | 86 | response; response to stimulus                     | 1.086 | 1.221 | 1.179 |
| 205218 | KIAA0178 [Homo sapiens]                                                   | 8  | 14 | biological process; cell division                  | 0.985 | 1.219 | 1.190 |
| 194384 | unnamed protein product [Homo sapiens]                                    | 3  | 8  | response to stimulus; metabolic process            | 1.021 | 1.219 | 1.082 |
| 767926 | PREDICTED: acyl-CoA dehydrogenase family member 9, mitochondrial          | 9  | 26 | cell organization and biogenesis                   | 1.069 | 1.218 | 1.199 |
| 530377 | PREDICTED: N-acyl ethanolamine-hydrolyzing acid amidase isoform           | 4  | 8  | metabolic process                                  | 1.050 | 1.217 | 1.210 |
| 530414 | PREDICTED: asparagine--tRNA ligase, cytoplasmic isoform X1 [Homo sapiens] | 13 | 56 | metabolic process                                  | 1.211 | 1.217 | 1.221 |
| 194376 | unnamed protein product [Homo sapiens]                                    | 3  | 12 | cell organization and biogenesis                   | 0.966 | 1.216 | 1.244 |
| 194386 | unnamed protein product [Homo sapiens]                                    | 9  | 30 | cell organization and biogenesis; cell division    | 1.137 | 1.215 | 1.202 |
| 157838 | Chain A, Tyrosine Phosphorylated Stat-1 DNA COMPLEX                       | 2  | 4  | cellular process; response to stimulus             | 0.919 | 1.215 | 1.132 |
| 508338 | unnamed protein product [Homo sapiens]                                    | 3  | 8  |                                                    | 0.962 | 1.214 | 1.204 |
| 194386 | unnamed protein product [Homo sapiens]                                    | 2  | 6  | ; regulation of biological process                 | 0.999 | 1.214 | 0.997 |
| 119626 | HDCMA18P protein, isoform CRA_c [Homo sapiens]                            | 2  | 5  | metabolic process; cell proliferation              | 0.816 | 1.212 | 1.108 |
| 119594 | transmembrane protein 109 [Homo sapiens]                                  | 2  | 30 | cellular process; response to stimulus             | 1.004 | 1.212 | 1.137 |
| 345301 | unnamed protein product [Homo sapiens]                                    | 3  | 4  | cellular process; response to stimulus             | 1.015 | 1.211 | 1.253 |
| 103485 | charged multivesicular body protein 1a isoform 2 [Homo sapiens]           | 3  | 13 | response to stimulus; cell division                | 1.106 | 1.211 | 1.115 |
| 119614 | tripartite motif-containing 25, isoform CRA_b [Homo sapiens]              | 8  | 21 | biological process; defense response               | 0.961 | 1.211 | 1.162 |
| 579762 | unnamed protein product [Homo sapiens]                                    | 2  | 2  |                                                    | 0.971 | 1.211 | 1.116 |
| 578819 | PREDICTED: NAD-dependent protein deacetylase sirtuin-1 isoform            | 2  | 3  | cell communication; cell differentiation           | 0.734 | 1.211 | 1.336 |
| 107641 | PELOTA [Homo sapiens]                                                     | 2  | 3  | ; cell division; metabolic process                 | 0.922 | 1.211 | 1.075 |
| 119582 | mitochondrial ribosomal protein L22 [Homo sapiens]                        | 2  | 6  | cell organization and biogenesis                   | 0.852 | 1.210 | 1.205 |
| 767960 | PREDICTED: cullin-2 isoform X1 [Homo sapiens]                             | 14 | 31 | cellular process; response to stimulus             | 1.093 | 1.210 | 1.040 |
| 119592 | mitofusin 2, isoform CRA_b [Homo sapiens]                                 | 3  | 8  | of biological process; coagulation                 | 0.843 | 1.210 | 1.124 |
| 217322 | hypothetical protein, partial [Homo sapiens]                              | 2  | 2  | cell organization and biogenesis                   | 0.889 | 1.209 | 1.178 |
| 116734 | interferon regulatory factor 2-binding protein 2 isoform B [Homo sapiens] | 4  | 23 | ; regulation of biological process                 | 0.987 | 1.209 | 1.149 |
| 578815 | PREDICTED: 39S ribosomal protein L13, mitochondrial isoform X1            | 4  | 6  | cell organization and biogenesis                   | 0.996 | 1.209 | 1.230 |
| 627022 | unknown [Homo sapiens]                                                    | 11 | 30 | cell organization and biogenesis; defense response | 1.123 | 1.208 | 1.225 |
| 768056 | PREDICTED: E3 ubiquitin-protein ligase HERC2 isoform X5 [Homo sapiens]    | 4  | 7  | ; regulation of biological process                 | 1.033 | 1.208 | 1.174 |
| 194384 | unnamed protein product [Homo sapiens]                                    | 3  | 6  | cellular process; response to stimulus             | 0.819 | 1.207 | 1.257 |
| 119570 | kinesin family member 11 [Homo sapiens]                                   | 6  | 13 | biological process; cell division                  | 1.009 | 1.207 | 1.074 |

|        |                                                                                                                   |    |     |                                     |       |       |       |
|--------|-------------------------------------------------------------------------------------------------------------------|----|-----|-------------------------------------|-------|-------|-------|
| 158259 | unnamed protein product [Homo sapiens]                                                                            | 4  | 18  | regulation of biological process    | 1.034 | 1.207 | 1.244 |
| 119584 | TBC1 domain family, member 5, isoform CRA_a [Homo sapiens]                                                        | 4  | 8   | ; transport; response to stimulus   | 0.799 | 1.206 | 1.233 |
| 119608 | cyclin-dependent kinase 9 (CDC2-related kinase), isoform CRA_a [Homo sapiens]                                     | 5  | 19  | logical process; cell proliferation | 0.866 | 1.206 | 1.139 |
| 119572 | ribosomal protein L18, isoform CRA_b [Homo sapiens]                                                               | 6  | 72  | zation and biogenesis; transport    | 1.143 | 1.206 | 1.114 |
| 767987 | PREDICTED: DNA repair endonuclease XPF isoform X4 [Homo sapiens]                                                  | 2  | 8   | ; regulation of biological process  | 0.955 | 1.205 | 1.256 |
| 194389 | unnamed protein product [Homo sapiens]                                                                            | 3  | 9   | ic process; response to stimulus    | 1.104 | 1.205 | 1.175 |
| 768031 | PREDICTED: serine/threonine-protein phosphatase 6 regulatory subunit 1 [Homo sapiens]                             | 3  | 8   |                                     | 0.833 | 1.204 | 1.137 |
| 119590 | chromosome 1 open reading frame 57, isoform CRA_c [Homo sapiens]                                                  | 2  | 8   | ic process; response to stimulus    | 0.929 | 1.204 | 1.138 |
| 548923 | 2-hydroxyacyl-CoA lyase 1 isoform d [Homo sapiens]                                                                | 5  | 20  | cell organization and biogenesis    | 0.940 | 1.204 | 1.121 |
| 119617 | cyclin-dependent kinase 2, isoform CRA_a [Homo sapiens]                                                           | 3  | 9   | genesis; coagulation; cell division | 1.295 | 1.204 | 1.155 |
| 119629 | propionyl Coenzyme A carboxylase, alpha polypeptide, isoform CR [Homo sapiens]                                    | 6  | 10  | metabolic process                   | 1.047 | 1.203 | 1.201 |
| 119597 | cancer susceptibility candidate 4, isoform CRA_c [Homo sapiens]                                                   | 2  | 6   |                                     | 0.764 | 1.202 | 1.201 |
| 544346 | DNA-directed RNA polymerase I subunit RPA2 isoform 4 [Homo sapiens]                                               | 3  | 5   | ; regulation of biological process  | 1.040 | 1.202 | 0.974 |
| 400311 | unnamed protein product [Homo sapiens]                                                                            | 2  | 8   |                                     | 1.262 | 1.201 | 1.040 |
| 530414 | PREDICTED: nucleus accumbens-associated protein 1 isoform X1 [Homo sapiens]                                       | 2  | 8   | cell organization and biogenesis    | 0.999 | 1.201 | 1.103 |
| 224028 | non-POU domain-containing octamer-binding protein isoform 2 [Homo sapiens]                                        | 14 | 107 | ; regulation of biological process  | 1.043 | 1.200 | 1.162 |
| 881922 | Chain B, Structure Of A Monoclinic Crystal Form Of Human Cytosolic Phosphoenolpyruvate Carboxylase [Homo sapiens] | 11 | 38  | metabolic process                   | 1.073 | 1.200 | 1.223 |
| 106112 | anpg, partial [Homo sapiens]                                                                                      | 7  | 22  | ic process; response to stimulus    | 0.845 | 1.199 | 1.260 |
| 299689 | Chain A, The Catalytic Domain Of Usp8 In Complex With A Usp8 Subunit [Homo sapiens]                               | 2  | 4   | metabolic process                   | 1.030 | 1.199 | 1.100 |
| 223597 | actin beta related pseudogene                                                                                     | 2  | 3   |                                     | 1.042 | 1.199 | 1.185 |
| 119620 | hCG16536, isoform CRA_b [Homo sapiens]                                                                            | 2  | 4   |                                     | 1.241 | 1.199 | 1.200 |
| 119604 | regulatory factor X, 1 (influences HLA class II expression) [Homo sapiens]                                        | 4  | 6   | al process; response to stimulus    | 1.024 | 1.199 | 1.252 |
| 119619 | hCG1820685 [Homo sapiens]                                                                                         | 2  | 7   |                                     | 1.120 | 1.198 | 1.104 |
| 119608 | chromosome 9 open reading frame 126, isoform CRA_b [Homo sapiens]                                                 | 2  | 4   | al process; response to stimulus    | 0.873 | 1.198 | 1.203 |
| 476786 | PK1.3 [Homo sapiens]                                                                                              | 3  | 8   | ; regulation of biological process  | 1.132 | 1.198 | 1.183 |
| 543039 | aging-associated gene 7 protein [Homo sapiens]                                                                    | 5  | 27  | response to stimulus; cell division | 0.923 | 1.197 | 1.062 |
| 767916 | PREDICTED: metaxin-2 isoform X1 [Homo sapiens]                                                                    | 2  | 3   | transport; metabolic process        | 1.030 | 1.197 | 1.160 |
| 824079 | Chain F, Crystal Structure Of 14-3-3 Gamma In Complex With A Phosphotyrosine Phosphatase [Homo sapiens]           | 12 | 200 |                                     | 1.088 | 1.197 | 1.163 |
| 119578 | smu-1 suppressor of mec-8 and unc-52 homolog (C. elegans), isoform X1 [Homo sapiens]                              | 9  | 28  |                                     | 1.084 | 1.197 | 1.143 |
| 194388 | unnamed protein product [Homo sapiens]                                                                            | 3  | 23  | n; cellular component movement      | 0.898 | 1.196 | 1.061 |
| 119592 | huntingtin interacting protein 1, isoform CRA_a [Homo sapiens]                                                    | 5  | 13  | erentiation; response to stimulus   | 0.902 | 1.196 | 0.992 |
| 140358 | unnamed protein product [Homo sapiens]                                                                            | 6  | 23  |                                     | 1.108 | 1.196 | 1.242 |
| 119595 | opioid growth factor receptor, isoform CRA_b [Homo sapiens]                                                       | 4  | 7   | al process; response to stimulus    | 1.143 | 1.195 | 1.288 |
| 153418 | Ribosomal protein L8 [Homo sapiens]                                                                               | 4  | 46  | zation and biogenesis; transport    | 0.874 | 1.195 | 1.196 |
| 249873 | Chain B, Structure Of The Human Nuclear Cap-Binding-Complex (Ncap80) [Homo sapiens]                               | 3  | 7   | metabolic process                   | 1.067 | 1.195 | 1.100 |
| 158261 | unnamed protein product [Homo sapiens]                                                                            | 4  | 14  | ; regulation of biological process  | 1.024 | 1.194 | 1.175 |
| 158254 | unnamed protein product [Homo sapiens]                                                                            | 10 | 43  | al process; response to stimulus    | 1.189 | 1.194 | 1.219 |
| 255759 | WD repeat-containing protein 81 isoform 1 [Homo sapiens]                                                          | 3  | 4   | gical process; cell differentiation | 0.821 | 1.194 | 1.123 |
| 541027 | maleylacetoacetate isomerase [Homo sapiens]                                                                       | 2  | 6   | metabolic process                   | 1.006 | 1.194 | 1.115 |
| 119602 | huntingtin (Huntington disease), isoform CRA_c [Homo sapiens]                                                     | 6  | 10  | component movement; cell death      | 1.022 | 1.193 | 1.124 |



|        |                                                                                          |    |     |                                                 |       |       |       |
|--------|------------------------------------------------------------------------------------------|----|-----|-------------------------------------------------|-------|-------|-------|
| 119593 | tripartite motif-containing 28, isoform CRA_c [Homo sapiens]                             | 17 | 140 | response to stimulus; defense response          | 0.968 | 1.193 | 1.127 |
| 119593 | ATP-binding cassette, sub-family D (ALD), member 3, isoform CRA_c [Homo sapiens]         | 13 | 63  | biogenesis; response to stimulus                | 1.099 | 1.192 | 1.153 |
| 119619 | elongation factor Tu GTP binding domain containing 1, isoform CRA_c [Homo sapiens]       | 2  | 3   | cell organization and biogenesis                | 0.901 | 1.192 | 1.131 |
| 768004 | PREDICTED: lamin-B2 isoform X1 [Homo sapiens]                                            | 29 | 203 |                                                 | 1.055 | 1.192 | 1.294 |
| 598971 | macoilin isoform 2 [Homo sapiens]                                                        | 2  | 5   |                                                 | 0.834 | 1.191 | 1.132 |
| 194374 | unnamed protein product [Homo sapiens]                                                   | 4  | 8   | metabolic process                               | 1.097 | 1.191 | 1.100 |
| 767915 | PREDICTED: nucleolysin TIA-1 isoform p40 isoform X1 [Homo sapiens]                       | 8  | 37  | cellular process; response to stimulus          | 0.963 | 1.191 | 1.045 |
| 578826 | PREDICTED: secretory carrier-associated membrane protein 2 isoform X1 [Homo sapiens]     | 4  | 26  | transport                                       | 0.946 | 1.191 | 1.265 |
| 189053 | unnamed protein product [Homo sapiens]                                                   | 12 | 90  | metabolic process                               | 0.973 | 1.191 | 1.110 |
| 194388 | unnamed protein product [Homo sapiens]                                                   | 5  | 13  | metabolic process                               | 0.876 | 1.190 | 1.153 |
| 767910 | PREDICTED: U4/U6 small nuclear ribonucleoprotein Prp3 isoform X1 [Homo sapiens]          | 5  | 9   | cell biogenesis; metabolic process              | 1.111 | 1.189 | 1.146 |
| 481460 | VDAC2 [Homo sapiens]                                                                     | 10 | 69  | regulation of biological process                | 1.079 | 1.189 | 1.194 |
| 281931 | unnamed protein product (plasmid) [Homo sapiens]                                         | 2  | 8   | regulation of biological process                | 1.090 | 1.189 | 1.112 |
| 119622 | THO complex 1, isoform CRA_c [Homo sapiens]                                              | 4  | 8   | cell death; response to stimulus                | 0.869 | 1.188 | 1.136 |
| 119593 | hypothetical protein FLJ20699, isoform CRA_b [Homo sapiens]                              | 4  | 14  |                                                 | 1.032 | 1.188 | 1.113 |
| 767990 | PREDICTED: ubiquitin carboxyl-terminal hydrolase 10 isoform X3 [Homo sapiens]            | 6  | 15  | regulation of biological process                | 1.143 | 1.188 | 1.193 |
| 119613 | neuron derived neurotrophic factor [Homo sapiens]                                        | 2  | 4   | regulation of biological process                | 1.181 | 1.188 | 1.230 |
| 163965 | thiosulfate sulfurtransferase/rhodanese-like domain-containing protein [Homo sapiens]    | 3  | 12  |                                                 | 0.850 | 1.188 | 1.080 |
| 194381 | unnamed protein product [Homo sapiens]                                                   | 2  | 3   | regulation of biological process                | 0.977 | 1.188 | 1.109 |
| 119616 | cytidine monophosphate N-acetylneuraminic acid synthetase, isoform X1 [Homo sapiens]     | 5  | 20  | metabolic process                               | 1.177 | 1.187 | 1.393 |
| 194384 | unnamed protein product [Homo sapiens]                                                   | 8  | 41  | metabolic process; transport                    | 1.245 | 1.187 | 1.108 |
| 158258 | unnamed protein product [Homo sapiens]                                                   | 11 | 58  | metabolic process; transport                    | 1.042 | 1.187 | 1.134 |
| 403072 | Chain F, Espg-Rab1-Arf6 Complex                                                          | 3  | 7   |                                                 | 1.047 | 1.186 | 1.106 |
| 194390 | unnamed protein product [Homo sapiens]                                                   | 2  | 3   |                                                 | 0.862 | 1.186 | 1.111 |
| 119611 | ADP-ribosylation factor-like 8A, isoform CRA_b [Homo sapiens]                            | 4  | 16  | response to stimulus; cell division             | 1.078 | 1.185 | 1.084 |
| 530400 | PREDICTED: ras-related protein Rab-5B isoform X1 [Homo sapiens]                          | 9  | 51  | cellular process; response to stimulus          | 1.114 | 1.185 | 1.068 |
| 409791 | unnamed protein product, partial [Homo sapiens]                                          | 3  | 6   |                                                 | 0.844 | 1.185 | 1.118 |
| 273707 | Similar to kinesin family member 21A, partial [Homo sapiens]                             | 3  | 6   | regulation of biological process                | 0.938 | 1.184 | 1.085 |
| 119621 | AFG3 ATPase family gene 3-like 2 (yeast), isoform CRA_a, partial [Homo sapiens]          | 8  | 40  | regulation of biological process; transport     | 1.077 | 1.183 | 1.256 |
| 258614 | branched-chain-amino-acid aminotransferase, mitochondrial isoform X1 [Homo sapiens]      | 8  | 31  | metabolic process                               | 1.061 | 1.183 | 1.203 |
| 316983 | NADH-ubiquinone oxidoreductase 75 kDa subunit, mitochondrial isoform X1 [Homo sapiens]   | 11 | 40  | cell organization and biogenesis                | 0.988 | 1.182 | 1.165 |
| 684106 | calcium-binding transporter, partial [Homo sapiens]                                      | 4  | 10  | cellular process; response to stimulus          | 1.176 | 1.182 | 1.175 |
| 158260 | unnamed protein product [Homo sapiens]                                                   | 17 | 73  | cellular process; cell division                 | 1.041 | 1.182 | 1.110 |
| 767925 | PREDICTED: cohesin subunit SA-1 isoform X1 [Homo sapiens]                                | 6  | 11  | regulation of biological process; cell division | 0.988 | 1.182 | 1.118 |
| 419636 | AP-3 complex subunit beta-1 isoform 2 [Homo sapiens]                                     | 16 | 50  | regulation of biological process                | 1.050 | 1.181 | 1.166 |
| 119572 | Vac14 homolog (S. cerevisiae), isoform CRA_c [Homo sapiens]                              | 4  | 13  | cellular process; response to stimulus          | 1.201 | 1.181 | 1.074 |
| 767920 | PREDICTED: calcium-binding mitochondrial carrier protein Aralar1 [Homo sapiens]          | 11 | 51  | transport; response to stimulus                 | 1.060 | 1.181 | 1.195 |
| 626301 | unknown, partial [Homo sapiens]                                                          | 16 | 64  | metabolic process                               | 1.019 | 1.181 | 1.105 |
| 767920 | PREDICTED: integrin-linked kinase-associated serine/threonine phosphatase [Homo sapiens] | 4  | 11  | metabolic process                               | 1.081 | 1.180 | 1.095 |
| 665081 | PRO1975 [Homo sapiens]                                                                   | 6  | 12  | metabolic process                               | 1.025 | 1.180 | 1.092 |

|        |                                                                                                                       |    |     |                                               |       |       |       |
|--------|-----------------------------------------------------------------------------------------------------------------------|----|-----|-----------------------------------------------|-------|-------|-------|
| 767931 | PREDICTED: ELMO domain-containing protein 2 isoform X1 [Homo sapiens]                                                 | 4  | 23  | response; response to stimulus                | 1.054 | 1.180 | 1.096 |
| 578809 | PREDICTED: rap1 GTPase-GDP dissociation stimulator 1 isoform X1 [Homo sapiens]                                        | 3  | 8   | response to stimulus; cellular homeostasis    | 1.012 | 1.180 | 1.208 |
| 194385 | unnamed protein product [Homo sapiens]                                                                                | 2  | 5   | metabolic process                             | 0.744 | 1.179 | 1.058 |
| 118142 | NOP56 protein, partial [Homo sapiens]                                                                                 | 12 | 69  | metabolic process                             | 1.127 | 1.179 | 1.153 |
| 578839 | PREDICTED: elongation factor 1-delta isoform X6 [Homo sapiens]                                                        | 8  | 124 | cellular process; response to stimulus        | 0.969 | 1.179 | 1.077 |
| 317455 | Chain B, Crystal Structure Of Human Nudt5 Complexed With 8-oxo-dGTP                                                   | 3  | 6   |                                               | 1.062 | 1.179 | 0.996 |
| 119613 | lysophospholipase-like 1, isoform CRA_d [Homo sapiens]                                                                | 4  | 12  | regulation of biological process              | 0.938 | 1.179 | 1.237 |
| 120539 | RNA binding motif protein 12 [Homo sapiens]                                                                           | 7  | 37  |                                               | 0.954 | 1.177 | 1.095 |
| 118480 | TPA_exp: RNA binding motif protein 15 isoform L2 [Homo sapiens]                                                       | 12 | 25  | regulation of biological process              | 0.915 | 1.177 | 1.128 |
| 530385 | PREDICTED: mitotic spindle assembly checkpoint protein MAD1 isoform 1 [Homo sapiens]                                  | 5  | 11  | response to stimulus; cell division           | 0.927 | 1.176 | 1.114 |
| 158255 | unnamed protein product [Homo sapiens]                                                                                | 9  | 23  | regulation of biological process              | 0.983 | 1.176 | 1.192 |
| 118026 | 8-oxo-dGDP phosphatase NUDT18 [Homo sapiens]                                                                          | 3  | 8   | metabolic process                             | 0.953 | 1.176 | 1.123 |
| 119585 | transmembrane protein 113, isoform CRA_a [Homo sapiens]                                                               | 5  | 12  | cell biogenesis; metabolic process            | 0.951 | 1.175 | 1.208 |
| 767906 | PREDICTED: eukaryotic translation initiation factor 4 gamma 3 isoform 1 [Homo sapiens]                                | 6  | 19  | cellular process; response to stimulus        | 1.103 | 1.175 | 1.286 |
| 119580 | solute carrier family 25 (mitochondrial carrier; peroxisomal membrane protein) member 1, isoform CRA_b [Homo sapiens] | 2  | 7   | metabolic process; transport                  | 0.896 | 1.175 | 1.053 |
| 767924 | PREDICTED: DNA topoisomerase 2-beta isoform X2 [Homo sapiens]                                                         | 23 | 87  | regulation of biological process              | 1.043 | 1.174 | 1.207 |
| 157831 | Chain A, Structural And Electrophysiological Analysis Of Annexin A2                                                   | 15 | 172 |                                               | 1.248 | 1.173 | 1.377 |
| 158256 | unnamed protein product [Homo sapiens]                                                                                | 3  | 7   | response; response to stimulus                | 0.809 | 1.173 | 1.058 |
| 581975 | putative transferase CAF17, mitochondrial isoform 1 precursor [Homo sapiens]                                          | 3  | 9   | cell organization and biogenesis              | 0.834 | 1.173 | 1.119 |
| 253723 | Chain A, Solution Structure Of Human Sap18                                                                            | 3  | 4   |                                               | 1.008 | 1.172 | 1.350 |
| 620887 | ATP-binding cassette, sub-family F, member 1 variant, partial [Homo sapiens]                                          | 5  | 19  | regulation of biological process; transport   | 1.075 | 1.172 | 1.128 |
| 119603 | syntrophin, beta 2 (dystrophin-associated protein A1, 59kDa, basic) [Homo sapiens]                                    | 10 | 40  |                                               | 0.955 | 1.172 | 1.089 |
| 400261 | Chain L, Crystal Structure Of The Tip48 (Tip49b) Hexamer                                                              | 12 | 117 |                                               | 1.090 | 1.170 | 1.080 |
| 119569 | bromodomain and WD repeat domain containing 2, isoform CRA_d [Homo sapiens]                                           | 6  | 15  | metabolic process                             | 1.039 | 1.169 | 1.008 |
| 578829 | PREDICTED: pyruvate dehydrogenase phosphatase regulatory subunit 1 [Homo sapiens]                                     | 10 | 19  | regulation of biological process              | 1.116 | 1.169 | 1.320 |
| 161172 | Chain B, Phosphorylation Independent Interactions Between 14-3-3 and p38                                              | 14 | 204 |                                               | 1.164 | 1.168 | 1.165 |
| 119577 | cleft lip and palate associated transmembrane protein 1, isoform CRA_c [Homo sapiens]                                 | 4  | 14  | regulation of biological process              | 0.839 | 1.167 | 1.038 |
| 119624 | mitochondrial carrier homolog 1 (C. elegans), isoform CRA_e [Homo sapiens]                                            | 3  | 8   | cell organization and biogenesis              | 1.057 | 1.167 | 0.897 |
| 400310 | unnamed protein product [Homo sapiens]                                                                                | 3  | 13  |                                               | 0.960 | 1.167 | 1.050 |
| 629889 | unknown, partial [Homo sapiens]                                                                                       | 3  | 4   | metabolic process                             | 0.885 | 1.167 | 0.971 |
| 221043 | unnamed protein product [Homo sapiens]                                                                                | 2  | 2   | metabolic process                             | 0.907 | 1.167 | 1.140 |
| 119615 | hypothetical protein MGC10993, isoform CRA_a [Homo sapiens]                                                           | 2  | 3   |                                               | 1.041 | 1.167 | 1.036 |
| 767914 | PREDICTED: proteasome activator complex subunit 4 isoform X5 [Homo sapiens]                                           | 4  | 10  | cell biogenesis; defense response             | 0.988 | 1.167 | 1.014 |
| 530425 | PREDICTED: receptor-type tyrosine-protein phosphatase S isoform 1 [Homo sapiens]                                      | 4  | 7   | cell biogenesis; metabolic process            | 0.986 | 1.166 | 1.065 |
| 324021 | serine/threonine-protein phosphatase 5 isoform 2 [Homo sapiens]                                                       | 3  | 8   | cellular movement; defense response           | 1.064 | 1.166 | 1.135 |
| 119589 | ClpP caseinolytic peptidase, ATP-dependent, proteolytic subunit h [Homo sapiens]                                      | 2  | 14  | cell organization and biogenesis              | 0.911 | 1.165 | 1.097 |
| 635574 | ras-related protein Rab-5A isoform 2 [Homo sapiens]                                                                   | 8  | 41  | cell biogenesis; metabolic process            | 1.098 | 1.165 | 1.068 |
| 768000 | PREDICTED: ribonucleoprotein PTB-binding 1 isoform X1 [Homo sapiens]                                                  | 4  | 11  | metabolic process                             | 1.039 | 1.165 | 1.192 |
| 767979 | PREDICTED: WD repeat-containing protein 89 isoform X1 [Homo sapiens]                                                  | 2  | 4   |                                               | 0.918 | 1.164 | 1.090 |
| 119594 | spectrin, beta, non-erythrocytic 2, isoform CRA_b [Homo sapiens]                                                      | 19 | 46  | cellular process; transport; defense response | 0.993 | 1.164 | 1.186 |

|        |                                                                                                                         |    |     |                                                 |       |       |       |
|--------|-------------------------------------------------------------------------------------------------------------------------|----|-----|-------------------------------------------------|-------|-------|-------|
| 119582 | NADH dehydrogenase (ubiquinone) 1 alpha subcomplex, 2, 8kDa [Homo sapiens]                                              | 2  | 13  | metabolic process; transport                    | 1.127 | 1.164 | 1.094 |
| 119594 | oxysterol binding protein [Homo sapiens]                                                                                | 12 | 40  | regulation of biological process                | 1.142 | 1.164 | 1.043 |
| 119610 | proline, glutamic acid and leucine rich protein 1, isoform CRA_c [Homo sapiens]                                         | 7  | 19  | cellular process; response to stimulus          | 0.923 | 1.164 | 1.189 |
| 127796 | Aldehyde dehydrogenase 7 family, member A1 [Homo sapiens]                                                               | 10 | 65  | metabolic process                               | 0.988 | 1.164 | 1.068 |
| 514829 | Chain A, Crystal Structure Of The Otu Domain Of Otulin At 1.3 Angstroms [Homo sapiens]                                  | 2  | 11  |                                                 | 1.194 | 1.163 | 1.089 |
| 193783 | unnamed protein product [Homo sapiens]                                                                                  | 2  | 7   | regulation of biological process                | 1.001 | 1.163 | 1.136 |
| 145989 | unnamed protein product [Homo sapiens]                                                                                  | 5  | 10  |                                                 | 0.996 | 1.162 | 1.095 |
| 767935 | PREDICTED: inositol hexakisphosphate and diphosphoinositol-phosphate binding protein [Homo sapiens]                     | 3  | 8   | metabolic process                               | 0.782 | 1.162 | 1.038 |
| 339462 | lysophosphatidylcholine acyltransferase 1 [Homo sapiens]                                                                | 9  | 42  | regulation of biological process                | 0.976 | 1.161 | 1.099 |
| 119605 | glycosyltransferase 25 domain containing 1, isoform CRA_c, partial [Homo sapiens]                                       | 10 | 44  | cell organization and biogenesis                | 1.097 | 1.161 | 1.182 |
| 111309 | CKAP5 protein [Homo sapiens]                                                                                            | 3  | 7   | stimulus; transport; cell division              | 0.905 | 1.161 | 1.017 |
| 222080 | TBC1 domain family, member 17 [Homo sapiens]                                                                            | 4  | 16  | regulation of biological process                | 1.115 | 1.161 | 1.064 |
| 767968 | PREDICTED: 1-phosphatidylinositol 4,5-bisphosphate phosphodiesterase-1 [Homo sapiens]                                   | 18 | 78  | cellular communication; metabolic process       | 0.983 | 1.160 | 1.112 |
| 409757 | unnamed protein product, partial [Homo sapiens]                                                                         | 4  | 9   |                                                 | 1.085 | 1.159 | 1.030 |
| 119614 | mbt domain containing 1, isoform CRA_c [Homo sapiens]                                                                   | 2  | 3   | cell organization and biogenesis                | 0.980 | 1.159 | 1.088 |
| 217562 | unnamed protein product [Homo sapiens]                                                                                  | 3  | 7   | cellular communication; cell differentiation    | 1.169 | 1.158 | 1.247 |
| 133777 | GGT7 protein, partial [Homo sapiens]                                                                                    | 2  | 5   | metabolic process                               | 1.174 | 1.158 | 1.164 |
| 756142 | Chain v, Human Constitutive 20s Proteasome In Complex With Cap1 [Homo sapiens]                                          | 7  | 47  |                                                 | 1.029 | 1.157 | 1.037 |
| 394025 | 26S proteasome non-ATPase regulatory subunit 5 isoform 2 [Homo sapiens]                                                 | 7  | 49  | cell organization and biogenesis                | 1.148 | 1.157 | 1.116 |
| 476057 | IDN3-B [Homo sapiens]                                                                                                   | 2  | 6   | regulation of biological process                | 1.097 | 1.157 | 1.056 |
| 620884 | Guanine nucleotide-binding protein G, alpha subunit variant, partial [Homo sapiens]                                     | 4  | 18  | response to stimulus; coagulation               | 1.097 | 1.157 | 1.100 |
| 530383 | PREDICTED: unconventional myosin-VI isoform X6 [Homo sapiens]                                                           | 19 | 79  | cellular process; cell differentiation          | 1.020 | 1.157 | 1.135 |
| 767997 | PREDICTED: serine/threonine-protein phosphatase 4 regulatory subunit 1 [Homo sapiens]                                   | 2  | 4   | cellular process; response to stimulus          | 0.798 | 1.157 | 1.134 |
| 119611 | laminin, gamma 1 (formerly LAMB2), isoform CRA_a [Homo sapiens]                                                         | 3  | 5   | regulation of biological process                | 0.799 | 1.157 | 1.012 |
| 768018 | PREDICTED: RNA-binding protein 39 isoform X1 [Homo sapiens]                                                             | 7  | 26  | regulation of biological process                | 1.082 | 1.156 | 1.116 |
| 578803 | PREDICTED: condensin complex subunit 2 isoform X2 [Homo sapiens]                                                        | 2  | 4   | metabolic process; cell division                | 0.823 | 1.156 | 1.117 |
| 626302 | unknown [Homo sapiens]                                                                                                  | 9  | 21  | cell organization and biogenesis                | 0.953 | 1.156 | 1.143 |
| 762885 | Plakoglobin [Homo sapiens]                                                                                              | 18 | 160 | cellular process; response to stimulus          | 1.043 | 1.155 | 1.098 |
| 767994 | PREDICTED: alpha-N-acetylglucosaminidase isoform X2 [Homo sapiens]                                                      | 2  | 3   | biogenesis; response to stimulus                | 0.803 | 1.155 | 1.094 |
| 287037 | Similar to expressed sequence AI450757, partial [Homo sapiens]                                                          | 3  | 17  | metabolic process                               | 1.233 | 1.155 | 1.133 |
| 308153 | RecName: Full=Putative GTP-binding protein 6; AltName: Full=Pseudomonas fluorescens protein 6 [Pseudomonas fluorescens] | 4  | 9   | transport                                       | 1.091 | 1.154 | 1.280 |
| 119599 | DEAH (Asp-Glu-Ala-His) box polypeptide 36, isoform CRA_c [Homo sapiens]                                                 | 5  | 7   | cellular process; defense response              | 0.981 | 1.154 | 1.157 |
| 620882 | neurofibromin variant, partial [Homo sapiens]                                                                           | 2  | 3   | cellular process; defense response; transport   | 1.143 | 1.154 | 0.986 |
| 625310 | COMMD2 protein [Homo sapiens]                                                                                           | 2  | 5   | regulation of biological process                | 0.914 | 1.154 | 1.180 |
| 119625 | progesterone receptor membrane component 2, isoform CRA_b [Homo sapiens]                                                | 5  | 36  | cellular process; response to stimulus          | 1.086 | 1.153 | 1.261 |
| 194386 | unnamed protein product [Homo sapiens]                                                                                  | 22 | 189 | cell growth; response to stimulus               | 1.141 | 1.152 | 1.100 |
| 578832 | PREDICTED: transmembrane emp24 domain-containing protein 1 [Homo sapiens]                                               | 2  | 11  | cellular process; cell communication; transport | 0.936 | 1.152 | 1.009 |
| 119627 | mitochondrial ribosomal protein S15, isoform CRA_c [Homo sapiens]                                                       | 4  | 12  | cell organization and biogenesis                | 1.052 | 1.152 | 1.131 |
| 119590 | X-ray repair complementing defective repair in Chinese hamster cells 1 [Homo sapiens]                                   | 22 | 90  | response to stimulus; cell differentiation      | 1.061 | 1.152 | 1.096 |
| 338747 | GSPT1 protein [Homo sapiens]                                                                                            | 10 | 30  | cell organization and biogenesis                | 1.025 | 1.152 | 1.124 |

|        |                                                                                        |    |     |                                     |       |       |       |
|--------|----------------------------------------------------------------------------------------|----|-----|-------------------------------------|-------|-------|-------|
| 374683 | 38kDa splicing factor [Homo sapiens]                                                   | 6  | 14  |                                     | 1.076 | 1.151 | 1.035 |
| 119603 | Nedd4 binding protein 1 [Homo sapiens]                                                 | 2  | 2   | al process; response to stimulus    | 0.866 | 1.151 | 1.190 |
| 530393 | PREDICTED: sideroflexin-4 isoform X1 [Homo sapiens]                                    | 5  | 8   | transport                           | 1.077 | 1.150 | 1.183 |
| 119583 | malic enzyme 2, NAD(+)-dependent, mitochondrial, isoform CRA_b                         | 12 | 43  | ; regulation of biological process  | 1.079 | 1.150 | 1.145 |
| 104419 | unknown [Homo sapiens]                                                                 | 2  | 5   | gical process; metabolic process    | 1.166 | 1.150 | 1.133 |
| 311815 | unnamed protein product [Homo sapiens]                                                 | 4  | 29  |                                     | 1.036 | 1.150 | 1.089 |
| 119605 | homer homolog 3 (Drosophila), isoform CRA_c [Homo sapiens]                             | 3  | 6   | al process; response to stimulus    | 1.043 | 1.149 | 1.059 |
| 530366 | PREDICTED: REST corepressor 3 isoform X4 [Homo sapiens]                                | 2  | 3   | ; regulation of biological process  | 0.991 | 1.148 | 1.046 |
| 768024 | PREDICTED: myosin-9 isoform X1 [Homo sapiens]                                          | 62 | 534 | us; transport; cell differentiation | 1.079 | 1.147 | 1.146 |
| 189168 | KIAA1974 protein, partial [Homo sapiens]                                               | 3  | 8   | metabolic process                   | 0.924 | 1.146 | 1.057 |
| 242556 | Chain A, Structure Of Human Ist1(Ntd) (Residues 1-189)(P43212)                         | 2  | 8   |                                     | 1.250 | 1.146 | 1.219 |
| 194378 | unnamed protein product [Homo sapiens]                                                 | 5  | 18  | component movement; transport       | 0.973 | 1.146 | 1.257 |
| 194386 | unnamed protein product [Homo sapiens]                                                 | 7  | 29  | metabolic process                   | 0.921 | 1.145 | 1.063 |
| 525460 | hypothetical protein [Homo sapiens]                                                    | 5  | 8   | metabolic process                   | 1.135 | 1.145 | 1.230 |
| 301171 | ATP-dependent RNA helicase DDX3X isoform 3 [Homo sapiens]                              | 16 | 117 | nd biogenesis; defense response     | 1.061 | 1.144 | 1.058 |
| 767942 | PREDICTED: midasin isoform X1 [Homo sapiens]                                           | 3  | 6   | d biogenesis; metabolic process     | 0.997 | 1.144 | 1.095 |
| 189053 | unnamed protein product [Homo sapiens]                                                 | 4  | 9   | metabolic process                   | 1.001 | 1.144 | 1.033 |
| 119616 | basic transcription factor 3, isoform CRA_b [Homo sapiens]                             | 3  | 5   | n of biological process; transport  | 0.835 | 1.144 | 1.329 |
| 194386 | unnamed protein product [Homo sapiens]                                                 | 5  | 20  | response to stimulus; cell division | 1.158 | 1.144 | 1.089 |
| 338790 | glucose transporter glycoprotein, partial [Homo sapiens]                               | 3  | 12  | ; regulation of biological process  | 1.292 | 1.144 | 1.078 |
| 144956 | CTP synthase [Homo sapiens]                                                            | 9  | 25  | oliferation; response to stimulus   | 1.107 | 1.143 | 1.141 |
| 172412 | tip associating protein [Homo sapiens]                                                 | 7  | 22  | transport; metabolic process        | 0.927 | 1.143 | 1.010 |
| 119577 | suppressor of Ty 5 homolog (S. cerevisiae), isoform CRA_a [Homo sapiens]               | 20 | 67  | velopment; response to stimulus     | 0.954 | 1.143 | 1.209 |
| 119594 | PRP19/PSO4 pre-mRNA processing factor 19 homolog (S. cerevisiae)                       | 10 | 48  | ; regulation of biological process  | 1.190 | 1.143 | 1.054 |
| 767952 | PREDICTED: cleavage and polyadenylation specificity factor subunit 1 [Homo sapiens]    | 16 | 46  | metabolic process; transport        | 0.945 | 1.142 | 1.087 |
| 189054 | unnamed protein product [Homo sapiens]                                                 | 11 | 77  | sis; metabolic process; transport   | 1.047 | 1.142 | 1.137 |
| 193788 | unnamed protein product [Homo sapiens]                                                 | 4  | 6   | gical process; metabolic process    | 0.979 | 1.142 | 1.032 |
| 119600 | chromosome 13 open reading frame 10, isoform CRA_b [Homo sapiens]                      | 3  | 8   | ; regulation of biological process  | 0.818 | 1.141 | 1.052 |
| 620885 | Transformation/transcription domain-associated protein variant, partial [Homo sapiens] | 14 | 34  | ; regulation of biological process  | 1.000 | 1.141 | 1.126 |
| 264547 | MARS2 protein [Homo sapiens]                                                           | 3  | 5   | metabolic process                   | 0.850 | 1.141 | 1.112 |
| 509499 | hypothetical protein [Homo sapiens]                                                    | 24 | 101 | cell organization and biogenesis    | 1.028 | 1.141 | 1.113 |
| 460771 | hnRNP-E1 [Homo sapiens]                                                                | 11 | 118 | metabolic process                   | 1.085 | 1.141 | 1.101 |
| 119609 | leprecan-like 2, isoform CRA_a [Homo sapiens]                                          | 4  | 8   | cell organization and biogenesis    | 0.799 | 1.140 | 1.171 |
| 194378 | unnamed protein product, partial [Homo sapiens]                                        | 2  | 2   | ; transport; cellular homeostasis   | 0.889 | 1.140 | 1.126 |
| 488538 | histone H1.5 [Homo sapiens]                                                            | 6  | 56  | cell organization and biogenesis    | 0.895 | 1.139 | 1.245 |
| 158256 | unnamed protein product [Homo sapiens]                                                 | 9  | 72  | to stimulus; cell communication     | 0.947 | 1.139 | 1.121 |
| 189053 | unnamed protein product [Homo sapiens]                                                 | 14 | 83  | ; regulation of biological process  | 0.981 | 1.138 | 1.184 |
| 119607 | mitochondrial ribosomal protein S28, isoform CRA_c [Homo sapiens]                      | 2  | 8   | d biogenesis; metabolic process     | 0.974 | 1.138 | 1.082 |
| 198519 | CLL-associated antigen KW-12, partial [Homo sapiens]                                   | 5  | 21  | sis; metabolic process; transport   | 1.244 | 1.137 | 1.205 |
| 104355 | unnamed protein product [Homo sapiens]                                                 | 4  | 16  | metabolic process                   | 1.008 | 1.136 | 1.195 |



|        |                                                                    |    |     |                                      |       |       |       |
|--------|--------------------------------------------------------------------|----|-----|--------------------------------------|-------|-------|-------|
| 557803 | Chain A, Nmr Structures Of Human Apoptotic Protein Tbid In Lppg    | 4  | 12  |                                      | 0.923 | 1.136 | 1.236 |
| 119629 | RAN binding protein 5, isoform CRA_c [Homo sapiens]                | 7  | 16  | al process; response to stimulus     | 1.092 | 1.135 | 1.059 |
| 194388 | unnamed protein product [Homo sapiens]                             | 3  | 8   | cell organization and biogenesis     | 0.850 | 1.135 | 1.235 |
| 733215 | transmembrane emp24 domain-containing protein 4 isoform 5 [Ho      | 6  | 29  | al process; response to stimulus     | 1.081 | 1.134 | 1.180 |
| 119611 | aspartyl-tRNA synthetase 2 (mitochondrial), isoform CRA_b [Homo    | 17 | 40  | metabolic process                    | 1.215 | 1.133 | 1.125 |
| 119591 | NADH dehydrogenase (ubiquinone) 1 alpha subcomplex, 10, 42kDa      | 2  | 9   | ic process; response to stimulus     | 1.059 | 1.133 | 0.940 |
| 36100  | unnamed protein product [Homo sapiens]                             | 9  | 50  |                                      | 1.075 | 1.132 | 1.265 |
| 475850 | 3-hydroxyacyl-CoA dehydrogenase type-2 isoform 1 [Homo sapien      | 10 | 109 | cell organization and biogenesis     | 1.011 | 1.132 | 1.077 |
| 347836 | SNW1 protein, partial [Homo sapiens]                               | 5  | 17  | se to stimulus; cell differentiation | 0.953 | 1.132 | 1.200 |
| 193785 | unnamed protein product [Homo sapiens]                             | 18 | 113 | gical process; metabolic process     | 1.165 | 1.132 | 1.135 |
| 119621 | VAMP (vesicle-associated membrane protein)-associated protein A    | 3  | 8   | response to stimulus; cell death     | 0.811 | 1.131 | 1.169 |
| 30524  | dihydrolipoamide S-acetyltransferase, partial [Homo sapiens]       | 2  | 3   | ; regulation of biological process   | 0.783 | 1.131 | 1.140 |
| 119611 | zinc finger CCCH-type containing 11A, isoform CRA_a [Homo sapi     | 2  | 2   | transport                            | 0.873 | 1.131 | 1.176 |
| 119617 | SWI/SNF related, matrix associated, actin dependent regulator of c | 8  | 24  | d biogenesis; metabolic process      | 0.898 | 1.131 | 1.078 |
| 161660 | disintegrin-metalloprotease MADM, partial [Homo sapiens]           | 4  | 12  | cell organization and biogenesis     | 1.024 | 1.130 | 1.083 |
| 189053 | unnamed protein product [Homo sapiens]                             | 8  | 51  | gical process; cell differentiation  | 0.975 | 1.130 | 1.184 |
| 193785 | unnamed protein product [Homo sapiens]                             | 10 | 36  | metabolic process                    | 1.097 | 1.130 | 1.216 |
| 715645 | dedicator of cytokinesis 7, partial [Homo sapiens]                 | 11 | 26  | al process; response to stimulus     | 0.914 | 1.130 | 1.101 |
| 767926 | PREDICTED: arf-GAP with coiled-coil, ANK repeat and PH domain-     | 2  | 3   | al process; response to stimulus     | 0.972 | 1.130 | 1.207 |
| 189066 | unnamed protein product [Homo sapiens]                             | 15 | 127 | ic process; response to stimulus     | 1.142 | 1.130 | 1.164 |
| 530389 | PREDICTED: leucine-rich repeat-containing protein 14 isoform X3    | 3  | 4   |                                      | 1.054 | 1.129 | 1.202 |
| 158260 | unnamed protein product [Homo sapiens]                             | 4  | 30  | metabolic process; transport         | 1.048 | 1.129 | 0.998 |
| 133755 | HP95 [Homo sapiens]                                                | 15 | 40  | n of biological process; transport   | 1.008 | 1.129 | 1.148 |
| 221043 | unnamed protein product [Homo sapiens]                             | 9  | 519 | cell organization and biogenesis     | 1.040 | 1.128 | 1.067 |
| 119624 | exportin 5, isoform CRA_b [Homo sapiens]                           | 4  | 8   | ; regulation of biological process   | 0.894 | 1.127 | 1.043 |
| 119607 | mitochondrial ribosomal protein L15 [Homo sapiens]                 | 5  | 23  | cell organization and biogenesis     | 0.942 | 1.127 | 1.202 |
| 140434 | DNA fragmentation factor, 45kDa, alpha polypeptide [Homo sapien    | 3  | 9   | ; regulation of biological process   | 1.270 | 1.127 | 1.117 |
| 119599 | karyopherin alpha 1 (importin alpha 5), isoform CRA_a [Homo sapi   | 3  | 9   | biogenesis; response to stimulus     | 1.136 | 1.125 | 0.909 |
| 119585 | RNA binding motif protein 15B [Homo sapiens]                       | 5  | 12  | ss; metabolic process; transport     | 0.890 | 1.125 | 1.100 |
| 767919 | PREDICTED: 28S ribosomal protein S9, mitochondrial isoform X1      | 3  | 5   | biogenesis; response to stimulus     | 0.895 | 1.125 | 1.045 |
| 135440 | GPD1L protein, partial [Homo sapiens]                              | 7  | 28  | gical process; metabolic process     | 1.080 | 1.125 | 1.190 |
| 767981 | PREDICTED: uncharacterized aarF domain-containing protein kina     | 2  | 3   | metabolic process                    | 0.795 | 1.125 | 1.061 |
| 611049 | heat shock protein 90Ad [Homo sapiens]                             | 3  | 86  | ic process; response to stimulus     | 1.261 | 1.125 | 1.065 |
| 119625 | PET112-like (yeast), isoform CRA_b [Homo sapiens]                  | 2  | 4   | cell organization and biogenesis     | 0.814 | 1.125 | 1.131 |
| 768054 | PREDICTED: vacuolar protein sorting-associated protein 52 homo     | 8  | 15  | cell differentiation; transport      | 0.953 | 1.123 | 0.986 |
| 223582 | histone H4                                                         | 6  | 242 |                                      | 1.047 | 1.123 | 1.151 |
| 767934 | PREDICTED: NAD(P) transhydrogenase, mitochondrial isoform X1       | 8  | 16  | ; regulation of biological process   | 0.893 | 1.122 | 0.958 |
| 295322 | Chain C, Crystal Structure Of Human Hdac2 Complexed With An N      | 9  | 51  |                                      | 1.054 | 1.122 | 1.082 |
| 768019 | PREDICTED: ES1 protein homolog, mitochondrial isoform X5 [Homo     | 3  | 15  |                                      | 1.191 | 1.122 | 1.186 |
| 530416 | PREDICTED: DNA polymerase delta catalytic subunit isoform X2 [H    | 13 | 31  | o stimulus; cellular homeostasis     | 1.011 | 1.122 | 1.049 |

|        |                                                                                                                 |    |     |                                             |       |       |       |
|--------|-----------------------------------------------------------------------------------------------------------------|----|-----|---------------------------------------------|-------|-------|-------|
| 767936 | PREDICTED: probable ATP-dependent RNA helicase YTHDC2 isoform X1 [Homo sapiens]                                 | 4  | 11  | regulation of biological process            | 1.081 | 1.121 | 1.038 |
| 417637 | similar to calcium-independent phospholipase A2; similar to AC00469.1 [Homo sapiens]                            | 3  | 6   | biological process; cell death; transport   | 0.910 | 1.121 | 0.989 |
| 135591 | C447E6.1 (nucleotide binding protein 1 (E.coli MinD like)), partial [Homo sapiens]                              | 2  | 9   | cell biogenesis; metabolic process          | 0.901 | 1.121 | 1.248 |
| 837549 | Chain B, The Crystal Structure Of The Ras Related Protein Rras2 (Ras) [Homo sapiens]                            | 5  | 17  | biological process; response to stimulus    | 0.965 | 1.120 | 1.187 |
| 119611 | translocated promoter region (to activated MET oncogene), isoform X1 [Homo sapiens]                             | 24 | 140 | response to stimulus; cell division         | 1.049 | 1.120 | 1.091 |
| 158257 | unnamed protein product [Homo sapiens]                                                                          | 23 | 100 | biogenesis; response to stimulus            | 0.974 | 1.120 | 1.038 |
| 142782 | Chain D, Ran-Rcc1-So4 Complex [Homo sapiens]                                                                    | 5  | 8   |                                             | 1.048 | 1.120 | 1.161 |
| 109734 | Myosin, heavy chain 10, non-muscle [Homo sapiens]                                                               | 36 | 183 | metabolic process; cell proliferation       | 1.028 | 1.120 | 1.124 |
| 578832 | PREDICTED: oxysterol-binding protein-related protein 1 isoform X1 [Homo sapiens]                                | 3  | 7   | transport; metabolic process                | 0.723 | 1.120 | 0.966 |
| 119612 | family with sequence similarity 49, member B, isoform CRA_b [Homo sapiens]                                      | 4  | 15  |                                             | 0.937 | 1.119 | 0.992 |
| 673023 | Chain L, Crystal Structure Of The D3b Subcomplex Of The Human D3b Subcomplex [Homo sapiens]                     | 6  | 16  | regulation of biological process            | 1.048 | 1.119 | 0.996 |
| 193785 | unnamed protein product [Homo sapiens]                                                                          | 3  | 6   | metabolic process                           | 0.911 | 1.117 | 1.087 |
| 253723 | Chain A, Coupling Of Folding And Binding In The Ptb Domain Of The Ptb Domain [Homo sapiens]                     | 3  | 4   |                                             | 1.080 | 1.117 | 0.881 |
| 160948 | integrator complex subunit 1 [Homo sapiens]                                                                     | 12 | 27  | regulation of biological process            | 1.037 | 1.117 | 0.999 |
| 119588 | FAD-dependent oxidoreductase domain containing 1, isoform CRA_a [Homo sapiens]                                  | 4  | 11  | cell biogenesis; metabolic process          | 1.096 | 1.116 | 1.109 |
| 578839 | PREDICTED: elongation factor 1-delta isoform X5 [Homo sapiens]                                                  | 9  | 157 | biological process; response to stimulus    | 0.993 | 1.116 | 1.031 |
| 394172 | eukaryotic protein synthesis initiation factor [Homo sapiens]                                                   | 20 | 103 | regulation of biological process            | 0.955 | 1.115 | 1.094 |
| 767948 | PREDICTED: cAMP-dependent protein kinase type II-beta regulator 1 [Homo sapiens]                                | 2  | 17  | ; coagulation; defense response             | 0.895 | 1.115 | 0.910 |
| 119585 | hCG14948, isoform CRA_b [Homo sapiens]                                                                          | 2  | 5   |                                             | 1.051 | 1.115 | 1.042 |
| 767917 | PREDICTED: aspartyl aminopeptidase isoform X2 [Homo sapiens]                                                    | 6  | 11  | metabolic process                           | 0.856 | 1.115 | 0.998 |
| 194390 | unnamed protein product [Homo sapiens]                                                                          | 3  | 9   | regulation of biological process            | 0.827 | 1.115 | 1.083 |
| 767912 | PREDICTED: RNA-binding protein 34 isoform X1 [Homo sapiens]                                                     | 5  | 15  |                                             | 0.956 | 1.114 | 1.021 |
| 194390 | unnamed protein product [Homo sapiens]                                                                          | 16 | 69  | response to stimulus; cell differentiation  | 0.959 | 1.114 | 1.066 |
| 119604 | eukaryotic translation initiation factor 3, subunit 4 delta, 44kDa [Homo sapiens]                               | 8  | 48  | regulation of biological process            | 1.052 | 1.114 | 1.064 |
| 620891 | TNF receptor-associated protein 1 variant, partial [Homo sapiens]                                               | 20 | 195 | regulation of biological process            | 1.086 | 1.114 | 1.107 |
| 217525 | unnamed protein product [Homo sapiens]                                                                          | 2  | 3   | transport                                   | 0.994 | 1.114 | 1.111 |
| 119609 | FK506 binding protein 4, 59kDa, isoform CRA_a [Homo sapiens]                                                    | 19 | 109 | biological process; response to stimulus    | 1.152 | 1.114 | 1.167 |
| 119610 | fructosamine 3 kinase, isoform CRA_a [Homo sapiens]                                                             | 5  | 14  | biological process; cell differentiation    | 0.945 | 1.114 | 1.118 |
| 150805 | Coiled-coil domain containing 51 [Homo sapiens]                                                                 | 6  | 11  | metabolic process                           | 0.859 | 1.114 | 1.135 |
| 119594 | glucosidase, alpha; neutral AB, isoform CRA_d [Homo sapiens]                                                    | 20 | 157 | metabolic process                           | 1.035 | 1.113 | 1.074 |
| 163265 | truncated BRE alpha a3+ isoform [Homo sapiens]                                                                  | 2  | 6   | cell organization and biogenesis            | 0.855 | 1.113 | 0.963 |
| 194377 | unnamed protein product [Homo sapiens]                                                                          | 8  | 61  | cell organization and biogenesis            | 1.026 | 1.112 | 1.089 |
| 578820 | PREDICTED: nuclear pore complex protein Nup98-Nup96 isoform X1 [Homo sapiens]                                   | 11 | 28  | biological process; response to stimulus    | 0.964 | 1.112 | 1.168 |
| 189065 | unnamed protein product [Homo sapiens]                                                                          | 15 | 62  | biological process; cell differentiation    | 0.940 | 1.112 | 1.109 |
| 194389 | unnamed protein product [Homo sapiens]                                                                          | 4  | 7   | regulation of biological process            | 0.918 | 1.112 | 1.174 |
| 578817 | PREDICTED: E3 ubiquitin-protein ligase LRSAM1 isoform X1 [Homo sapiens]                                         | 2  | 3   | cell organization and biogenesis; transport | 0.920 | 1.112 | 0.949 |
| 340780 | Chain A, Structural Analysis Of Checkpoint Kinase 2 (Chk2) In Correlation With Cell Cycle Arrest [Homo sapiens] | 2  | 5   | metabolic process                           | 0.958 | 1.111 | 1.185 |
| 189053 | unnamed protein product [Homo sapiens]                                                                          | 8  | 45  | ; cell division; cell differentiation       | 1.103 | 1.111 | 1.137 |
| 189342 | DEAD box polypeptide 27 [Homo sapiens]                                                                          | 8  | 20  | metabolic process                           | 0.836 | 1.111 | 1.058 |
| 118137 | Chain D, Crystal Structure Of A Beta-Catenin/BCL9/TCF4 COMPLEX [Homo sapiens]                                   | 20 | 128 |                                             | 1.087 | 1.110 | 0.968 |

|        |                                                                       |    |     |                                    |       |       |       |
|--------|-----------------------------------------------------------------------|----|-----|------------------------------------|-------|-------|-------|
| 381974 | LMAN2L protein, partial [Homo sapiens]                                | 4  | 10  | metabolic process; transport       | 1.179 | 1.110 | 1.080 |
| 121934 | KIF5C protein, partial [Homo sapiens]                                 | 10 | 36  | ent; metabolic process; transport  | 0.998 | 1.109 | 1.071 |
| 119610 | PRP8 pre-mRNA processing factor 8 homolog (yeast), isoform CRA        | 63 | 248 | d biogenesis; metabolic process    | 1.005 | 1.109 | 1.102 |
| 509492 | hypothetical protein, partial [Homo sapiens]                          | 2  | 6   | d biogenesis; metabolic process    | 1.000 | 1.109 | 1.094 |
| 119627 | tetratricopeptide repeat domain 4, isoform CRA_d [Homo sapiens]       | 2  | 4   |                                    | 0.829 | 1.109 | 1.043 |
| 333509 | cytoplasmic dynein 1 heavy chain 1 [Homo sapiens]                     | 88 | 346 | component movement; cell death     | 1.081 | 1.109 | 1.096 |
| 119610 | solute carrier family 25 (mitochondrial carrier; dicarboxylate transp | 11 | 70  | metabolic process; transport       | 1.049 | 1.108 | 1.050 |
| 291084 | pyruvate dehydrogenase E1 component subunit alpha, somatic fo         | 10 | 59  | ; regulation of biological process | 1.057 | 1.108 | 1.023 |
| 119610 | THO complex 4, partial [Homo sapiens]                                 | 3  | 20  | ; transport; response to stimulus  | 0.950 | 1.108 | 1.101 |
| 193785 | unnamed protein product [Homo sapiens]                                | 11 | 56  | transport                          | 1.085 | 1.108 | 1.087 |
| 580367 | hypothetical protein, partial [Homo sapiens]                          | 8  | 26  | ; regulation of biological process | 0.996 | 1.108 | 1.180 |
| 468889 | hypothetical protein [Homo sapiens]                                   | 3  | 6   | on and biogenesis; development     | 0.893 | 1.108 | 1.113 |
| 767980 | PREDICTED: tyrosyl-DNA phosphodiesterase 1 isoform X2 [Homo           | 4  | 8   | ic process; response to stimulus   | 1.016 | 1.107 | 0.969 |
| 112490 | Chain A, Structure Of U2af65 Variant With Polyuridine Tract           | 3  | 7   |                                    | 0.863 | 1.107 | 1.218 |
| 119577 | exosome component 5 [Homo sapiens]                                    | 3  | 9   | e response; response to stimulus   | 0.946 | 1.107 | 1.135 |
| 767924 | PREDICTED: SWI/SNF complex subunit SMARCC1 isoform X2 [Ho             | 8  | 35  | al process; response to stimulus   | 0.998 | 1.106 | 1.073 |
| 119570 | hCG1994130, isoform CRA_b [Homo sapiens]                              | 8  | 53  | metabolic process                  | 0.918 | 1.106 | 1.036 |
| 189065 | unnamed protein product [Homo sapiens]                                | 3  | 43  | zation and biogenesis; transport   | 1.031 | 1.106 | 1.125 |
| 768017 | PREDICTED: ADP-ribosylation factor GTPase-activating protein 1 i      | 3  | 6   | cell organization and biogenesis   | 0.959 | 1.105 | 1.109 |
| 194386 | unnamed protein product [Homo sapiens]                                | 12 | 74  | cell death; response to stimulus   | 1.092 | 1.105 | 0.914 |
| 158258 | unnamed protein product [Homo sapiens]                                | 16 | 127 | metabolic process                  | 1.081 | 1.104 | 1.082 |
| 404992 | transcription factor WSTF [Homo sapiens]                              | 4  | 10  | ; regulation of biological process | 0.915 | 1.104 | 1.074 |
| 205210 | KIAA0539 protein, partial [Homo sapiens]                              | 3  | 4   |                                    | 1.006 | 1.104 | 1.147 |
| 104349 | unnamed protein product [Homo sapiens]                                | 3  | 6   | transport                          | 1.008 | 1.104 | 1.172 |
| 120660 | Mitochondrial ribosomal protein L45 [Homo sapiens]                    | 4  | 7   | d biogenesis; metabolic process    | 1.059 | 1.104 | 1.081 |
| 189054 | unnamed protein product [Homo sapiens]                                | 12 | 53  | differentiation; defense response  | 1.079 | 1.103 | 1.146 |
| 194374 | unnamed protein product [Homo sapiens]                                | 5  | 27  | al process; response to stimulus   | 1.154 | 1.103 | 1.044 |
| 114781 | desmoplakin I [Homo sapiens]                                          | 45 | 206 | erentiation; response to stimulus  | 0.976 | 1.102 | 1.085 |
| 194386 | unnamed protein product [Homo sapiens]                                | 12 | 37  | ; regulation of biological process | 0.981 | 1.102 | 1.023 |
| 189167 | KIAA1942 protein, partial [Homo sapiens]                              | 2  | 4   |                                    | 1.104 | 1.102 | 1.161 |
| 119608 | GTPase activating protein and VPS9 domains 1, isoform CRA_c [H        | 9  | 20  | al process; response to stimulus   | 0.871 | 1.102 | 1.018 |
| 582054 | fragile X mental retardation 1 [Homo sapiens]                         | 7  | 28  | n of biological process; transport | 0.964 | 1.102 | 1.113 |
| 119594 | glucosidase, alpha; neutral AB, isoform CRA_a [Homo sapiens]          | 21 | 164 | metabolic process                  | 1.047 | 1.102 | 1.078 |
| 768002 | PREDICTED: dnaJ homolog subfamily B member 1 isoform X1 [Ho           | 3  | 24  | ; regulation of biological process | 1.072 | 1.102 | 1.135 |
| 767978 | PREDICTED: zinc finger MYM-type protein 2 isoform X6 [Homo sap        | 2  | 3   | ; regulation of biological process | 0.974 | 1.101 | 1.164 |
| 194384 | unnamed protein product [Homo sapiens]                                | 9  | 46  | ; regulation of biological process | 1.119 | 1.101 | 1.108 |
| 135436 | Karyopherin alpha 2 (RAG cohort 1, importin alpha 1) [Homo sapie      | 6  | 24  | ; response to stimulus; transport  | 1.008 | 1.101 | 0.947 |
| 119575 | exocyst complex component 2, isoform CRA_a [Homo sapiens]             | 4  | 12  | ; regulation of biological process | 0.898 | 1.100 | 1.147 |
| 137855 | p27BBP protein [Homo sapiens]                                         | 4  | 42  | cell organization and biogenesis   | 1.118 | 1.100 | 1.043 |
| 767904 | PREDICTED: nardilysin isoform X5 [Homo sapiens]                       | 4  | 10  | ; regulation of biological process | 0.941 | 1.100 | 1.148 |

|        |                                                                     |    |     |                                      |       |       |       |
|--------|---------------------------------------------------------------------|----|-----|--------------------------------------|-------|-------|-------|
| 187954 | LRR16A protein [Homo sapiens]                                       | 4  | 4   | gical process; metabolic process     | 0.858 | 1.099 | 1.151 |
| 620893 | CSDA protein variant, partial [Homo sapiens]                        | 2  | 17  | ic process; response to stimulus     | 0.879 | 1.099 | 1.179 |
| 119627 | CAP, adenylate cyclase-associated protein 1 (yeast), isoform CRA    | 13 | 65  | esponse to stimulus; coagulation     | 1.051 | 1.098 | 1.043 |
| 119630 | hCG2039972, isoform CRA_a [Homo sapiens]                            | 3  | 6   | cell organization and biogenesis     | 0.689 | 1.098 | 1.102 |
| 194375 | unnamed protein product [Homo sapiens]                              | 4  | 9   | response to stimulus; cell death     | 0.817 | 1.098 | 1.077 |
| 221042 | unnamed protein product [Homo sapiens]                              | 2  | 5   | differentiation; defense response    | 0.939 | 1.098 | 1.335 |
| 525458 | hypothetical protein, partial [Homo sapiens]                        | 15 | 122 |                                      | 0.939 | 1.098 | 1.051 |
| 471233 | Dystrophin [Homo sapiens]                                           | 2  | 4   | ic process; cellular homeostasis     | 1.148 | 1.098 | 1.118 |
| 334573 | interferon regulatory factor 2-binding protein-like [Homo sapiens]  | 4  | 17  | regulation of biological process     | 1.214 | 1.098 | 1.071 |
| 381738 | ARNT protein [Homo sapiens]                                         | 2  | 4   | bolic process; cell differentiation  | 0.883 | 1.098 | 1.019 |
| 111309 | Nuclear transport factor 2-like export factor 2 [Homo sapiens]      | 4  | 13  | transport                            | 0.951 | 1.097 | 0.978 |
| 691258 | 6-phosphogluconolactonase [Homo sapiens]                            | 8  | 50  | metabolic process                    | 0.995 | 1.097 | 1.036 |
| 189065 | unnamed protein product [Homo sapiens]                              | 6  | 15  | ; regulation of biological process   | 1.068 | 1.096 | 1.142 |
| 119610 | Y box binding protein 2, isoform CRA_a [Homo sapiens]               | 3  | 21  | gical process; metabolic process     | 0.863 | 1.096 | 1.170 |
| 508772 | annexin A11 isoform 2 [Homo sapiens]                                | 9  | 48  | ell division; response to stimulus   | 1.034 | 1.096 | 1.128 |
| 260166 | zinc phosphodiesterase ELAC protein 2 isoform 3 [Homo sapiens]      | 6  | 16  | cell organization and biogenesis     | 0.971 | 1.096 | 1.072 |
| 119590 | ribosomal protein L37a, isoform CRA_c [Homo sapiens]                | 4  | 13  | ization and biogenesis; transport    | 1.031 | 1.096 | 1.057 |
| 768004 | PREDICTED: ran-binding protein 3 isoform X1 [Homo sapiens]          | 3  | 5   | transport                            | 1.006 | 1.096 | 1.128 |
| 119616 | telomeric repeat binding factor 2, interacting protein, isoform CRA | 3  | 5   | al process; response to stimulus     | 1.094 | 1.096 | 1.088 |
| 767956 | PREDICTED: transmembrane protein 245 isoform X6 [Homo sapien        | 4  | 19  |                                      | 0.929 | 1.096 | 1.077 |
| 119612 | RNA binding motif protein 12B, partial [Homo sapiens]               | 6  | 17  |                                      | 0.999 | 1.095 | 1.135 |
| 119631 | NCK-associated protein 1, isoform CRA_d [Homo sapiens]              | 15 | 33  | nd biogenesis; defense response      | 1.049 | 1.095 | 1.112 |
| 158258 | unnamed protein product [Homo sapiens]                              | 2  | 4   | metabolic process                    | 0.690 | 1.095 | 1.050 |
| 628224 | unknown [Homo sapiens]                                              | 5  | 18  | cell organization and biogenesis     | 1.081 | 1.095 | 1.115 |
| 530367 | PREDICTED: HEAT repeat-containing protein 5B isoform X4 [Homo       | 3  | 3   |                                      | 1.098 | 1.095 | 1.172 |
| 179431 | Chain S, Crystal Structure Of Human M-Calpain Form Ii               | 2  | 10  |                                      | 1.261 | 1.095 | 1.172 |
| 565500 | WD repeat and HMG-box DNA-binding protein 1 isoform 2 [Homo s       | 4  | 8   | cell organization and biogenesis     | 0.957 | 1.095 | 1.113 |
| 119630 | mitochondrial ribosomal protein S26 [Homo sapiens]                  | 3  | 12  | ic process; response to stimulus     | 1.001 | 1.095 | 1.138 |
| 159287 | Ribosomal protein L15 [Homo sapiens]                                | 4  | 60  | ization and biogenesis; transport    | 1.045 | 1.095 | 1.068 |
| 119573 | RAB25, member RAS oncogene family [Homo sapiens]                    | 9  | 29  | al process; response to stimulus     | 0.902 | 1.094 | 1.106 |
| 919929 | GNB1 protein, partial [Homo sapiens]                                | 9  | 78  | tion; cell proliferation; cell death | 0.947 | 1.093 | 1.057 |
| 197304 | Chain B, Dj-1 Activation By Catechol Quinone Modification           | 8  | 37  |                                      | 1.000 | 1.093 | 1.143 |
| 767941 | PREDICTED: DNA-directed RNA polymerases I and III subunit RPA       | 3  | 9   | e response; response to stimulus     | 0.945 | 1.093 | 1.029 |
| 119626 | nucleoporin 54kDa, isoform CRA_b [Homo sapiens]                     | 4  | 9   | al process; response to stimulus     | 1.074 | 1.092 | 1.084 |
| 119606 | heat shock 70kDa protein 14, isoform CRA_a [Homo sapiens]           | 6  | 16  | d biogenesis; metabolic process      | 0.889 | 1.092 | 1.129 |
| 119614 | clathrin, heavy polypeptide (Hc), isoform CRA_d [Homo sapiens]      | 48 | 436 | ; regulation of biological process   | 1.133 | 1.092 | 1.054 |
| 119604 | interleukin enhancer binding factor 3, 90kDa, isoform CRA_d [Hom    | 14 | 102 | e response; response to stimulus     | 1.066 | 1.092 | 0.998 |
| 168025 | interferon-stimulated gene factor 3 alpha 113 kda protein; ISGF3 a  | 2  | 4   |                                      | 0.822 | 1.091 | 1.209 |
| 459358 | Chain A, The Wild-type Src Homology 2 (sh2)-domain Containing F     | 6  | 30  |                                      | 1.017 | 1.091 | 1.027 |
| 119582 | DEAD (Asp-Glu-Aia-Asp) box polypeptide 46, isoform CRA_d [Hom       | 21 | 73  | ; regulation of biological process   | 1.073 | 1.091 | 1.063 |



|        |                                                                     |    |     |                                      |       |       |       |
|--------|---------------------------------------------------------------------|----|-----|--------------------------------------|-------|-------|-------|
| 119616 | hCG27698, isoform CRA_c [Homo sapiens]                              | 3  | 6   | al process; response to stimulus     | 0.955 | 1.091 | 1.049 |
| 119606 | BMS1-like, ribosome assembly protein (yeast), isoform CRA_c [Ho     | 3  | 6   | cell organization and biogenesis     | 0.908 | 1.091 | 1.179 |
| 556712 | NADH dehydrogenase subunit 5 (mitochondrion) [Homo sapiens]         | 2  | 4   | transport; metabolic process         | 1.099 | 1.090 | 0.896 |
| 189069 | unnamed protein product [Homo sapiens]                              | 23 | 207 | ; regulation of biological process   | 1.116 | 1.090 | 1.025 |
| 768002 | PREDICTED: E3 ubiquitin-protein ligase UHRF1 isoform X1 [Homo       | 3  | 8   | cell organization and biogenesis     | 0.925 | 1.090 | 1.040 |
| 119614 | sperm associated antigen 9, isoform CRA_b [Homo sapiens]            | 5  | 10  | cell organization and biogenesis     | 1.100 | 1.090 | 0.985 |
| 767902 | PREDICTED: kinesin-like protein KIF2C isoform X1 [Homo sapiens]     | 4  | 19  | s; cell proliferation; cell division | 1.000 | 1.090 | 1.073 |
| 189065 | unnamed protein product [Homo sapiens]                              | 16 | 130 | s; cell communication; transport     | 1.039 | 1.089 | 1.108 |
| 119577 | ribosomal protein S16, isoform CRA_b [Homo sapiens]                 | 11 | 53  | ization and biogenesis; transport    | 1.031 | 1.089 | 1.149 |
| 104338 | unnamed protein product [Homo sapiens]                              | 6  | 21  | on; transport; metabolic process     | 0.978 | 1.089 | 1.049 |
| 609412 | Chain B, Crystal Structure Of The Catalytic Domain Of Selenomethi   | 2  | 2   |                                      | 1.075 | 1.089 | 0.986 |
| 194378 | unnamed protein product [Homo sapiens]                              | 4  | 18  | of biological process; cell death    | 1.163 | 1.088 | 1.031 |
| 194375 | unnamed protein product [Homo sapiens]                              | 7  | 16  | metabolic process                    | 1.096 | 1.088 | 0.971 |
| 371833 | C3ORF4 [Homo sapiens]                                               | 2  | 5   |                                      | 1.011 | 1.088 | 1.141 |
| 119627 | histone deacetylase 1, isoform CRA_a [Homo sapiens]                 | 8  | 42  | ; coagulation; cell differentiation  | 1.032 | 1.087 | 1.037 |
| 119610 | methyltransferase 10 domain containing, isoform CRA_a [Homo sa      | 2  | 3   | metabolic process                    | 0.986 | 1.086 | 1.047 |
| 119615 | CDK5 regulatory subunit associated protein 3, isoform CRA_c [Ho     | 2  | 4   | d biogenesis; metabolic process      | 1.125 | 1.085 | 1.127 |
| 269968 | UDP-glucose ceramide glucosyltransferase-like 1 [Homo sapiens]      | 17 | 37  | metabolic process                    | 1.063 | 1.085 | 1.053 |
| 578807 | PREDICTED: guanine nucleotide-binding protein subunit beta-4 is     | 6  | 55  | response to stimulus; cell death     | 0.897 | 1.085 | 1.048 |
| 119580 | MORC family CW-type zinc finger 2, isoform CRA_b, partial [Homo     | 6  | 11  | metabolic process                    | 0.859 | 1.084 | 1.128 |
| 767922 | PREDICTED: ubiquitin-like modifier-activating enzyme ATG7 isofo     | 2  | 5   | nd biogenesis; defense response      | 0.872 | 1.084 | 1.126 |
| 194374 | unnamed protein product [Homo sapiens]                              | 4  | 17  |                                      | 0.968 | 1.084 | 1.662 |
| 180881 | General transcription factor IIIC, polypeptide 2, beta 110kDa [Homo | 3  | 6   | metabolic process                    | 0.882 | 1.084 | 1.073 |
| 189054 | unnamed protein product [Homo sapiens]                              | 9  | 113 | cell organization and biogenesis     | 0.991 | 1.084 | 1.048 |
| 767988 | PREDICTED: leucine carboxyl methyltransferase 1 isoform X3 [Ho      | 2  | 6   | ; regulation of biological process   | 1.140 | 1.084 | 1.093 |
| 36036  | GTPase [Homo sapiens]                                               | 2  | 6   | cell organization and biogenesis     | 1.044 | 1.083 | 1.113 |
| 768008 | PREDICTED: ER membrane protein complex subunit 10 isoform X4        | 3  | 11  |                                      | 1.030 | 1.083 | 1.153 |
| 119608 | ribosomal protein L12, isoform CRA_a [Homo sapiens]                 | 6  | 49  | sis; metabolic process; transport    | 1.094 | 1.083 | 0.987 |
| 189053 | unnamed protein product [Homo sapiens]                              | 7  | 47  | ization and biogenesis; transport    | 1.117 | 1.083 | 1.146 |
| 374074 | Chain A, Crystal Structure Of 14-3-3 Epsilon With Mif1 Peptide      | 15 | 279 |                                      | 1.161 | 1.083 | 1.098 |
| 530361 | PREDICTED: carnitine O-palmitoyltransferase 2, mitochondrial iso    | 7  | 20  | metabolic process; transport         | 0.896 | 1.083 | 1.020 |
| 159164 | Chain B, The Structure Of The Cyclin T-Binding Domain Of Hexim1     | 3  | 3   |                                      | 1.171 | 1.083 | 0.939 |
| 347447 | Chain G, Caspase-6 In Complex With Z-Vad-Fmk Inhibitor              | 3  | 5   | metabolic process                    | 0.805 | 1.083 | 1.019 |
| 530376 | PREDICTED: glucosamine-6-phosphate isomerase 2 isoform X2 [H        | 4  | 9   | metabolic process                    | 1.369 | 1.083 | 1.039 |
| 927262 | Chain C, Truncated Ran Wild Type In Complex With Gdp-bef And R      | 9  | 116 |                                      | 1.114 | 1.082 | 1.013 |
| 194383 | unnamed protein product [Homo sapiens]                              | 4  | 22  | cell organization and biogenesis     | 0.961 | 1.082 | 0.959 |
| 578837 | PREDICTED: DNA replication licensing factor MCM5 isoform X1 [H      | 14 | 73  | metabolic process                    | 1.024 | 1.082 | 1.056 |
| 502025 | repressor of estrogen receptor activity [Homo sapiens]              | 21 | 149 | cell organization and biogenesis     | 1.104 | 1.081 | 1.105 |
| 767961 | PREDICTED: vesicle transport through interaction with t-SNAREs      | 2  | 2   | cell organization and biogenesis     | 1.048 | 1.081 | 1.080 |
| 104404 | FLJ00084 protein, partial [Homo sapiens]                            | 4  | 7   | al process; response to stimulus     | 1.094 | 1.081 | 1.091 |

|        |                                                                        |    |     |                                     |       |       |       |
|--------|------------------------------------------------------------------------|----|-----|-------------------------------------|-------|-------|-------|
| 134364 | CPSF6 protein [Homo sapiens]                                           | 3  | 16  | cell organization and biogenesis    | 0.851 | 1.080 | 1.009 |
| 487775 | MAGE tumor antigen D1 [Homo sapiens]                                   | 4  | 6   | cell death; response to stimulus    | 1.203 | 1.080 | 1.110 |
| 768024 | PREDICTED: tRNA (uracil-5-)-methyltransferase homolog A isoform        | 2  | 6   | metabolic process                   | 0.688 | 1.080 | 0.954 |
| 119603 | synaptophysin-like 1, isoform CRA_b [Homo sapiens]                     | 2  | 10  | transport; cell communication       | 1.041 | 1.080 | 0.985 |
| 114306 | HSR1 protein [Homo sapiens]                                            | 7  | 24  | of biological process; transport    | 0.874 | 1.080 | 1.095 |
| 781017 | Chain A, 14-3-3 Protein Beta (human) In Complex With Exoenzyme         | 10 | 153 |                                     | 0.960 | 1.080 | 1.011 |
| 475866 | serine palmitoyltransferase 2 [Homo sapiens]                           | 9  | 21  | metabolic process                   | 1.004 | 1.079 | 1.094 |
| 119574 | vinculin, isoform CRA_c [Homo sapiens]                                 | 42 | 210 | of biological process; cell growth  | 0.949 | 1.078 | 1.134 |
| 273705 | MTA2 protein, partial [Homo sapiens]                                   | 19 | 72  | cell organization and biogenesis    | 0.964 | 1.078 | 1.081 |
| 119574 | procollagen-proline, 2-oxoglutarate 4-dioxygenase (proline 4-hydro     | 3  | 19  | cell organization and biogenesis    | 0.997 | 1.078 | 1.139 |
| 766207 | tetratricopeptide repeat protein 37 [Homo sapiens]                     | 7  | 13  |                                     | 0.879 | 1.078 | 0.996 |
| 157553 | regulator of nonsense transcript stability [Homo sapiens]              | 23 | 78  | ; regulation of biological process  | 1.012 | 1.078 | 1.049 |
| 121511 | NF-kappaB repressing factor, partial [Homo sapiens]                    | 9  | 22  | ; regulation of biological process  | 1.027 | 1.077 | 1.133 |
| 134104 | Chain A, Structure Of Human Asf1a In Complex With Histone H3           | 2  | 2   | cell organization and biogenesis    | 0.781 | 1.077 | 1.049 |
| 158259 | unnamed protein product [Homo sapiens]                                 | 2  | 5   | al process; response to stimulus    | 0.837 | 1.076 | 1.073 |
| 385999 | SNARE protein Ykt6, partial [Homo sapiens]                             | 8  | 28  | d biogenesis; metabolic process     | 1.173 | 1.076 | 1.095 |
| 482572 | COPG2 protein, partial [Homo sapiens]                                  | 11 | 40  | transport                           | 1.063 | 1.076 | 0.994 |
| 770580 | 28S ribosomal protein S2, mitochondrial [Homo sapiens]                 | 5  | 11  | cell organization and biogenesis    | 1.027 | 1.075 | 1.002 |
| 530429 | PREDICTED: flotillin-1 isoform X2 [Homo sapiens]                       | 5  | 12  | ; transport; response to stimulus   | 0.956 | 1.075 | 1.127 |
| 767968 | PREDICTED: phosphatidylinositol 3,4,5-trisphosphate 5-phosphat         | 11 | 30  | al process; response to stimulus    | 0.961 | 1.075 | 1.040 |
| 133777 | TJP3 protein, partial [Homo sapiens]                                   | 2  | 4   | regulation of biological process    | 0.815 | 1.075 | 1.054 |
| 555289 | 3'(2'),5'-bisphosphate nucleotidase 1 isoform 3 [Homo sapiens]         | 8  | 38  | metabolic process                   | 1.213 | 1.074 | 1.040 |
| 119610 | phospholipase D2, isoform CRA_b [Homo sapiens]                         | 5  | 9   | e; cellular component movement      | 0.941 | 1.074 | 0.958 |
| 494569 | YKT6, partial [Homo sapiens]                                           | 8  | 29  | d biogenesis; metabolic process     | 1.171 | 1.074 | 1.085 |
| 219520 | SART3 protein [Homo sapiens]                                           | 11 | 31  | logical process; cell proliferation | 1.148 | 1.074 | 1.172 |
| 530394 | PREDICTED: ATPase family AAA domain-containing protein 1 isoform       | 2  | 6   | cell organization and biogenesis    | 1.098 | 1.074 | 1.107 |
| 119576 | poly(A) binding protein interacting protein 1, isoform CRA_a [Homo     | 3  | 8   | ; regulation of biological process  | 0.950 | 1.074 | 1.126 |
| 767980 | PREDICTED: E3 ubiquitin-protein ligase HECTD1 isoform X4 [Homo         | 6  | 13  | ; regulation of biological process  | 0.951 | 1.074 | 1.105 |
| 339516 | transferrin receptor [Homo sapiens]                                    | 28 | 115 | nse response; cell differentiation  | 1.026 | 1.073 | 1.063 |
| 544063 | ubiquitin carboxyl-terminal hydrolase 47 isoform a [Homo sapiens]      | 6  | 21  | ; regulation of biological process  | 0.930 | 1.073 | 1.135 |
| 119627 | eukaryotic translation initiation factor 3, subunit 2 beta, 36kDa, iso | 7  | 51  | ; regulation of biological process  | 1.062 | 1.073 | 0.973 |
| 333944 | Chain A, Crystal Structure Of The Tpr Domain Of Kinesin Light Cha      | 2  | 9   |                                     | 0.978 | 1.072 | 1.015 |
| 767992 | PREDICTED: derlin-2 isoform X3 [Homo sapiens]                          | 2  | 6   | n of biological process; transport  | 1.026 | 1.072 | 0.992 |
| 119627 | leucine proline-enriched proteoglycan (leprecan) 1, isoform CRA_c      | 6  | 16  | cell organization and biogenesis    | 1.154 | 1.072 | 0.967 |
| 152772 | small nuclear ribonuclear protein D homolog [Homo sapiens]             | 3  | 14  | metabolic process                   | 1.188 | 1.072 | 1.218 |
| 119588 | male sterility domain containing 2, isoform CRA_b [Homo sapiens]       | 10 | 37  | metabolic process                   | 1.111 | 1.072 | 1.048 |
| 194376 | unnamed protein product [Homo sapiens]                                 | 4  | 10  | al process; response to stimulus    | 1.032 | 1.071 | 0.995 |
| 151314 | dJ85M6.1 (cleavage stimulation factor, 3' pre-RNA, subunit 3, 77kD     | 7  | 21  | metabolic process                   | 0.980 | 1.071 | 1.108 |
| 767980 | PREDICTED: exonuclease 3'-5' domain-containing protein 2 isoform       | 2  | 4   | metabolic process                   | 0.722 | 1.071 | 1.033 |
| 189067 | unnamed protein product [Homo sapiens]                                 | 2  | 8   | metabolic process; transport        | 1.110 | 1.071 | 1.083 |

|        |                                                                    |    |     |                                      |       |       |       |
|--------|--------------------------------------------------------------------|----|-----|--------------------------------------|-------|-------|-------|
| 288009 | unnamed protein product [Homo sapiens]                             | 8  | 19  |                                      | 0.850 | 1.071 | 1.051 |
| 372314 | USP39 protein, partial [Homo sapiens]                              | 8  | 31  | metabolic process; cell division     | 1.004 | 1.070 | 1.049 |
| 104413 | TPM4-ALK fusion oncoprotein type 2, partial [Homo sapiens]         | 9  | 68  | n; cellular component movement       | 1.222 | 1.069 | 1.179 |
| 119613 | glutamyl-prolyl-tRNA synthetase, isoform CRA_a [Homo sapiens]      | 26 | 106 | al process; response to stimulus     | 1.027 | 1.069 | 1.103 |
| 530376 | PREDICTED: LIM and calponin homology domains-containing prot       | 3  | 7   | cell organization and biogenesis     | 0.869 | 1.069 | 1.043 |
| 119572 | transient receptor potential cation channel, subfamily M, member 4 | 11 | 35  | ss; metabolic process; transport     | 0.988 | 1.069 | 1.017 |
| 189065 | unnamed protein product [Homo sapiens]                             | 29 | 235 | ; regulation of biological process   | 1.178 | 1.068 | 1.025 |
| 106364 | GTP-binding protein RAB22A [Homo sapiens]                          | 2  | 4   | al process; response to stimulus     | 0.926 | 1.068 | 0.964 |
| 767992 | PREDICTED: rabankyrin-5 isoform X4 [Homo sapiens]                  | 6  | 10  | ; regulation of biological process   | 1.116 | 1.068 | 1.038 |
| 409770 | unnamed protein product, partial [Homo sapiens]                    | 2  | 5   |                                      | 1.392 | 1.067 | 1.065 |
| 512393 | fragile X mental retardation 1 [Homo sapiens]                      | 7  | 27  | n of biological process; transport   | 0.956 | 1.066 | 1.110 |
| 221045 | unnamed protein product [Homo sapiens]                             | 3  | 6   | n; coagulation; defense response     | 1.182 | 1.066 | 1.019 |
| 624211 | actin-like protein, partial [Homo sapiens]                         | 3  | 120 | nd biogenesis; defense response      | 1.922 | 1.066 | 0.927 |
| 119632 | hypoxanthine phosphoribosyltransferase 1 (Lesch-Nyhan syndrom      | 3  | 25  | cell organization and biogenesis     | 1.063 | 1.065 | 0.986 |
| 158428 | Chain A, Crystal Structure Of Human Lsd1 At 2.3 A Resolution       | 9  | 26  | metabolic process                    | 1.012 | 1.065 | 1.021 |
| 158255 | unnamed protein product [Homo sapiens]                             | 5  | 13  | se to stimulus; defense response     | 1.077 | 1.065 | 1.115 |
| 400421 | unnamed protein product, partial [Homo sapiens]                    | 3  | 8   |                                      | 1.126 | 1.065 | 0.983 |
| 119627 | mitochondrial ribosomal protein L37, isoform CRA_a, partial [Hom   | 5  | 15  | cell organization and biogenesis     | 1.019 | 1.064 | 1.044 |
| 189053 | unnamed protein product [Homo sapiens]                             | 3  | 38  | ess; transport; cell differentiation | 1.388 | 1.064 | 1.151 |
| 296439 | RecName: Full=Nuclear pore complex protein Nup205; AltName: F      | 21 | 50  | al process; response to stimulus     | 1.009 | 1.064 | 1.080 |
| 298228 | autophagy-related protein 16-1 isoform 3 [Homo sapiens]            | 2  | 3   | ic process; response to stimulus     | 0.873 | 1.063 | 0.887 |
| 767934 | PREDICTED: zinc finger protein 622 isoform X1 [Homo sapiens]       | 2  | 9   | al process; response to stimulus     | 0.900 | 1.063 | 0.899 |
| 305836 | Rho guanine nucleotide exchange factor (GEF) 1 [Homo sapiens]      | 10 | 36  | nse to stimulus; cell proliferation  | 0.979 | 1.063 | 1.012 |
| 119621 | kinase D-interacting substance of 220 kDa, isoform CRA_c [Homo     | 5  | 9   | cell organization and biogenesis     | 0.958 | 1.063 | 1.129 |
| 578803 | PREDICTED: CLIP-associating protein 1 isoform X16 [Homo sapie      | 7  | 17  | nponent movement; cell division      | 0.860 | 1.063 | 1.064 |
| 414742 | unknown, partial [Homo sapiens]                                    | 7  | 19  | cell differentiation                 | 1.037 | 1.062 | 0.991 |
| 767968 | PREDICTED: RNA-binding protein 4B isoform X1 [Homo sapiens]        | 8  | 35  | al process; response to stimulus     | 0.980 | 1.062 | 1.043 |
| 767927 | PREDICTED: fragile X mental retardation syndrome-related protein   | 10 | 35  | gical process; cell differentiation  | 0.973 | 1.061 | 1.110 |
| 273705 | PTPLAD1 protein, partial [Homo sapiens]                            | 6  | 31  | e to stimulus; metabolic process     | 1.170 | 1.061 | 1.054 |
| 155224 | hRif beta subunit (p102 protein) [Homo sapiens]                    | 24 | 103 | metabolic process                    | 1.024 | 1.061 | 1.046 |
| 881925 | Chain B, Structure Of Human Mitochondrial Malonyltransferase       | 4  | 9   |                                      | 0.867 | 1.061 | 1.083 |
| 767975 | PREDICTED: 60S ribosomal protein L6 isoform X2 [Homo sapiens]      | 11 | 94  | n of biological process; transport   | 0.973 | 1.061 | 1.076 |
| 119609 | nucleolar protein 1, 120kDa [Homo sapiens]                         | 6  | 21  | ; regulation of biological process   | 1.033 | 1.060 | 1.072 |
| 119628 | sulfatase modifying factor 2, isoform CRA_j [Homo sapiens]         | 4  | 18  | metabolic process                    | 0.881 | 1.060 | 0.866 |
| 193787 | unnamed protein product [Homo sapiens]                             | 7  | 26  | ; regulation of biological process   | 0.884 | 1.060 | 1.032 |
| 119590 | poly (ADP-ribose) polymerase family, member 1, isoform CRA_a [H    | 22 | 115 | se to stimulus; cell differentiation | 1.103 | 1.060 | 1.143 |
| 767953 | PREDICTED: exosome complex component RRP41 isoform X2 [Hc          | 3  | 6   | e response; response to stimulus     | 1.078 | 1.060 | 1.028 |
| 710512 | BOP1 protein, partial [Homo sapiens]                               | 7  | 21  | ; regulation of biological process   | 0.956 | 1.060 | 0.936 |
| 207993 | Tho2 [Homo sapiens]                                                | 7  | 18  | metabolic process; transport         | 1.129 | 1.060 | 1.138 |
| 119607 | protein kinase, DNA-activated, catalytic polypeptide, isoform CRA  | 88 | 439 | on; cell death; defense response     | 1.055 | 1.060 | 1.012 |

|        |                                                                                           |    |     |                                                                       |       |       |       |
|--------|-------------------------------------------------------------------------------------------|----|-----|-----------------------------------------------------------------------|-------|-------|-------|
| 762573 | ubiquitin carboxyl-terminal hydrolase 48 isoform b [Homo sapiens]                         | 2  | 4   | regulation of biological process                                      | 0.976 | 1.059 | 0.988 |
| 732808 | hypothetical protein, partial [Homo sapiens]                                              | 3  | 12  | cell organization and biogenesis                                      | 0.894 | 1.059 | 1.073 |
| 221042 | unnamed protein product, partial [Homo sapiens]                                           | 4  | 7   | cell organization and biogenesis                                      | 0.922 | 1.058 | 1.058 |
| 509493 | hypothetical protein, partial [Homo sapiens]                                              | 2  | 5   | regulation of biological process                                      | 0.973 | 1.058 | 0.971 |
| 119591 | activating signal cointegrator 1 complex subunit 3-like 1, isoform C                      | 41 | 195 | biological process; cell differentiation                              | 1.111 | 1.058 | 1.038 |
| 767983 | PREDICTED: codanin-1 isoform X5 [Homo sapiens]                                            | 3  | 5   | regulation of biological process                                      | 1.174 | 1.057 | 1.231 |
| 767979 | PREDICTED: gamma-tubulin complex component 3 isoform X2 [Homo sapiens]                    | 4  | 7   | regulation of biological process                                      | 0.943 | 1.057 | 1.011 |
| 751368 | tyrosine-protein phosphatase non-receptor type 23 isoform 2 [Homo sapiens]                | 11 | 26  | cell organization and biogenesis                                      | 0.955 | 1.057 | 1.047 |
| 767984 | PREDICTED: vacuolar protein sorting-associated protein 18 homolog 1 [Homo sapiens]        | 3  | 6   | regulation of biological process                                      | 0.940 | 1.057 | 1.092 |
| 636666 | Chain B, Steroid Receptor Rna Activator (sra) Modification By The                         | 6  | 22  |                                                                       | 0.979 | 1.057 | 1.051 |
| 453056 | Chain A, Molecular Tweezers Modulate 14-3-3 Protein-protein Interactions                  | 6  | 82  |                                                                       | 0.938 | 1.057 | 1.004 |
| 289614 | transcriptional coactivator ALY, partial [Homo sapiens]                                   | 3  | 10  | transport; response to stimulus                                       | 0.988 | 1.056 | 1.236 |
| 283733 | Chain B, New Crystal Form Of Human Cd81 Large Extracellular Loop                          | 3  | 13  |                                                                       | 1.068 | 1.056 | 1.079 |
| 194380 | unnamed protein product [Homo sapiens]                                                    | 4  | 16  | regulation of biological process                                      | 1.070 | 1.056 | 0.851 |
| 663851 | deoxyribose-phosphate aldolase isoform 2 [Homo sapiens]                                   | 2  | 2   | metabolic process                                                     | 0.927 | 1.056 | 1.074 |
| 119603 | amyloid beta precursor protein binding protein 1, isoform CRA_b [Homo sapiens]            | 5  | 11  | cellular process; metabolic process; cell death                       | 1.096 | 1.056 | 0.963 |
| 440576 | alternative protein SLC35A4 [Homo sapiens]                                                | 2  | 4   | transport                                                             | 1.184 | 1.056 | 1.151 |
| 895740 | mitochondrial ATP synthase, H+ transporting F1 complex beta subunit 8 [Homo sapiens]      | 16 | 424 | cellular process; cellular homeostasis                                | 1.172 | 1.055 | 0.995 |
| 768007 | PREDICTED: HAUS augmin-like complex subunit 5 isoform X2 [Homo sapiens]                   | 2  | 3   | cellular process; cell division                                       | 0.944 | 1.055 | 0.941 |
| 768024 | PREDICTED: SUN domain-containing protein 2 isoform X1 [Homo sapiens]                      | 8  | 31  | cellular process; cellular component movement                         | 1.070 | 1.055 | 0.989 |
| 119596 | phosphatidylinositol glycan, class T, isoform CRA_d [Homo sapiens]                        | 7  | 24  | cellular process; cell differentiation; cell death                    | 1.014 | 1.055 | 0.944 |
| 119577 | optic atrophy 3 (autosomal recessive, with chorea and spastic paraparesis) [Homo sapiens] | 3  | 7   | cell organization and biogenesis                                      | 1.002 | 1.055 | 1.055 |
| 119604 | hCG2033702, isoform CRA_b [Homo sapiens]                                                  | 5  | 8   |                                                                       | 1.028 | 1.054 | 0.972 |
| 119628 | ribosomal protein L21, isoform CRA_d, partial [Homo sapiens]                              | 7  | 28  | cellular process; cell organization and biogenesis; transport         | 0.870 | 1.054 | 0.971 |
| 150299 | RNH1 protein, partial [Homo sapiens]                                                      | 11 | 84  | regulation of biological process                                      | 1.085 | 1.054 | 1.027 |
| 209870 | Chain B, Crystal Structure Of The Mammalian Copii-coat Protein Subunit 1 [Homo sapiens]   | 10 | 32  | transport                                                             | 0.913 | 1.054 | 1.015 |
| 694270 | Chain A, Leopard Syndrome-associated Shp2/q510e Mutant                                    | 6  | 19  |                                                                       | 1.010 | 1.053 | 1.040 |
| 530414 | PREDICTED: coiled-coil and C2 domain-containing protein 1A isoform 1 [Homo sapiens]       | 7  | 18  | cellular process; response to stimulus                                | 1.014 | 1.053 | 0.938 |
| 243080 | E3 UFM1-protein ligase 1 [Homo sapiens]                                                   | 5  | 14  | response to stimulus; metabolic process                               | 0.961 | 1.053 | 1.020 |
| 756142 | Chain r, Human Constitutive 20s Proteasome In Complex With Carboxyl-terminal Ubiquitin    | 5  | 14  | metabolic process                                                     | 0.939 | 1.053 | 0.939 |
| 119581 | tubulin, gamma complex associated protein 2, isoform CRA_a, partial [Homo sapiens]        | 3  | 8   | regulation of biological process                                      | 0.916 | 1.052 | 1.018 |
| 217393 | hypothetical protein, partial [Homo sapiens]                                              | 2  | 3   |                                                                       | 0.778 | 1.052 | 1.065 |
| 159795 | Chain B, Crystal Structure Of Human Mitochondrial Tyrosyl-trna Synthetase                 | 5  | 11  | metabolic process                                                     | 0.952 | 1.052 | 1.038 |
| 119624 | chromosome 6 open reading frame 108, isoform CRA_b [Homo sapiens]                         | 4  | 13  | cellular process; cell differentiation                                | 0.993 | 1.052 | 1.253 |
| 355333 | Chain B, Crystal Structure Of Human Mitochondrial Transcription Factor A [Homo sapiens]   | 2  | 5   |                                                                       | 1.292 | 1.052 | 1.108 |
| 276925 | NIPSNAP2 protein [Homo sapiens]                                                           | 4  | 16  | regulation of biological process                                      | 0.828 | 1.051 | 0.987 |
| 189458 | transferrin receptor protein 1 isoform 1 [Homo sapiens]                                   | 28 | 114 | cellular process; cell differentiation                                | 1.021 | 1.051 | 1.038 |
| 194382 | unnamed protein product [Homo sapiens]                                                    | 3  | 14  | cellular process; cell organization and biogenesis; metabolic process | 1.110 | 1.051 | 1.065 |
| 528881 | serine hydroxymethyltransferase, cytosolic isoform 3 [Homo sapiens]                       | 4  | 10  | cell organization and biogenesis                                      | 0.947 | 1.051 | 1.031 |
| 119602 | hCG1993037, isoform CRA_f [Homo sapiens]                                                  | 3  | 5   |                                                                       | 1.061 | 1.051 | 0.961 |



|        |                                                                                              |    |     |                                                 |       |       |       |
|--------|----------------------------------------------------------------------------------------------|----|-----|-------------------------------------------------|-------|-------|-------|
| 324819 | kinesin heavy chain member 2 [Homo sapiens]                                                  | 6  | 16  | cell differentiation; cell division             | 1.021 | 1.051 | 1.051 |
| 152154 | Valyl-tRNA synthetase [Homo sapiens]                                                         | 30 | 155 | regulation of biological process                | 1.038 | 1.050 | 1.029 |
| 325863 | GDP-D-mannose-4,6-dehydratase [Homo sapiens]                                                 | 6  | 19  | response to stimulus; metabolic process         | 0.971 | 1.050 | 1.042 |
| 194377 | unnamed protein product [Homo sapiens]                                                       | 2  | 4   | metabolic process                               | 1.050 | 1.050 | 1.076 |
| 767995 | PREDICTED: DNA topoisomerase 2-alpha isoform X2 [Homo sapiens]                               | 20 | 68  | regulation of biological process                | 1.003 | 1.050 | 1.084 |
| 280427 | alpha actinin 4 [Homo sapiens]                                                               | 27 | 237 | cell organization and biogenesis                | 1.079 | 1.050 | 1.108 |
| 767974 | PREDICTED: 5'-nucleotidase domain-containing protein 3 isoform 1 [Homo sapiens]              | 2  | 2   | metabolic process                               | 1.285 | 1.050 | 1.034 |
| 119606 | CTF18, chromosome transmission fidelity factor 18 homolog (S. cerevisiae)                    | 4  | 7   | metabolic process                               | 0.823 | 1.049 | 1.132 |
| 119585 | poly(rC) binding protein 4, isoform CRA_f [Homo sapiens]                                     | 2  | 3   |                                                 | 1.085 | 1.049 | 1.210 |
| 652383 | hypothalamus protein HT002 [Homo sapiens]                                                    | 2  | 5   | regulation of biological process                | 0.931 | 1.049 | 1.050 |
| 845699 | PURA protein, partial [Homo sapiens]                                                         | 2  | 2   | biological process; cell differentiation        | 1.092 | 1.049 | 1.194 |
| 217272 | polyribonucleotide 5'-hydroxyl-kinase Clp1 isoform 2 [Homo sapiens]                          | 3  | 5   | cell organization and biogenesis                | 1.054 | 1.049 | 1.039 |
| 767995 | PREDICTED: N-sulphoglucosamine sulphohydrolase isoform X4 [Homo sapiens]                     | 2  | 10  | metabolic process                               | 0.934 | 1.049 | 0.990 |
| 119624 | PTK7 protein tyrosine kinase 7, isoform CRA_b [Homo sapiens]                                 | 8  | 15  | cell biogenesis; cell differentiation           | 0.983 | 1.049 | 1.000 |
| 119606 | GTP binding protein 4, isoform CRA_b [Homo sapiens]                                          | 10 | 23  | response to stimulus; transport                 | 0.998 | 1.048 | 0.980 |
| 143806 | PWP2 [Homo sapiens]                                                                          | 10 | 25  | cell biogenesis; metabolic process              | 1.085 | 1.048 | 0.993 |
| 264681 | inner nuclear membrane protein Man1 isoform 2 [Homo sapiens]                                 | 3  | 6   | biological process; cell differentiation        | 1.084 | 1.048 | 1.110 |
| 476786 | SCA10 [Homo sapiens]                                                                         | 5  | 13  | cell organization and biogenesis                | 1.067 | 1.048 | 1.081 |
| 664805 | protein YIF1A isoform 2 [Homo sapiens]                                                       | 2  | 3   | response to stimulus; metabolic process         | 1.159 | 1.048 | 0.886 |
| 119569 | BUB3 budding uninhibited by benzimidazoles 3 homolog (yeast), isoform 1 [Homo sapiens]       | 7  | 39  | metabolic process; cell division                | 1.059 | 1.047 | 1.043 |
| 119610 | raptor, isoform CRA_b [Homo sapiens]                                                         | 3  | 7   | cell growth; cell communication                 | 1.077 | 1.047 | 1.043 |
| 119601 | pleckstrin homology domain containing, family C (with FERM domain) 1 [Homo sapiens]          | 4  | 8   | cell organization and biogenesis                | 1.228 | 1.046 | 1.101 |
| 177783 | Ro ribonucleoprotein [Homo sapiens]                                                          | 10 | 34  | cell organization and biogenesis                | 1.104 | 1.046 | 1.090 |
| 194386 | unnamed protein product [Homo sapiens]                                                       | 2  | 3   | regulation of biological process                | 1.016 | 1.046 | 0.981 |
| 588292 | Chain A, Crystal Structure Of Human 5t4 (wnt-activated Inhibitory Receptor) [Homo sapiens]   | 6  | 24  |                                                 | 0.937 | 1.046 | 1.074 |
| 119623 | transmembrane protein 11, isoform CRA_a [Homo sapiens]                                       | 4  | 11  | cell organization and biogenesis                | 0.984 | 1.046 | 1.104 |
| 194383 | unnamed protein product [Homo sapiens]                                                       | 3  | 27  | ; coagulation; defense response                 | 1.326 | 1.046 | 1.362 |
| 119611 | DEAH (Asp-Glu-Ala-His) box polypeptide 9, isoform CRA_b [Homo sapiens]                       | 37 | 274 | response to stimulus; defense response          | 1.061 | 1.046 | 1.035 |
| 119612 | eukaryotic translation initiation factor 3, subunit 3 gamma, 40kDa, isoform 1 [Homo sapiens] | 7  | 13  | regulation of biological process                | 1.152 | 1.046 | 1.131 |
| 253722 | Chain A, Crystal Structure Of Sr Protein Kinase 1 Complexed To Its Substrate [Homo sapiens]  | 3  | 9   | metabolic process                               | 1.046 | 1.045 | 0.985 |
| 148342 | RAB11B protein [Homo sapiens]                                                                | 12 | 81  | biological process; response to stimulus        | 0.977 | 1.045 | 1.085 |
| 194376 | unnamed protein product [Homo sapiens]                                                       | 7  | 46  | regulation of biological process                | 1.146 | 1.045 | 1.100 |
| 530369 | PREDICTED: pre-mRNA 3' end processing protein WDR33 isoform 1 [Homo sapiens]                 | 2  | 5   | biological process; response to stimulus        | 0.884 | 1.045 | 1.102 |
| 194388 | unnamed protein product [Homo sapiens]                                                       | 2  | 2   | regulation of biological process                | 0.898 | 1.045 | 1.004 |
| 119609 | hCG1789827 [Homo sapiens]                                                                    | 2  | 18  | metabolic process                               | 1.137 | 1.045 | 0.895 |
| 337518 | ribosomal protein, partial [Homo sapiens]                                                    | 6  | 39  | cell organization and biogenesis; transport     | 0.905 | 1.045 | 1.042 |
| 530366 | PREDICTED: isoamyl acetate-hydrolyzing esterase 1 homolog isoform 1 [Homo sapiens]           | 4  | 12  | metabolic process                               | 0.876 | 1.045 | 1.044 |
| 530362 | PREDICTED: putative helicase MOV-10 isoform X2 [Homo sapiens]                                | 10 | 26  | response to stimulus; defense response          | 0.960 | 1.045 | 1.008 |
| 119612 | RAD21 homolog (S. pombe), isoform CRA_b [Homo sapiens]                                       | 4  | 11  | cell organization and biogenesis; cell division | 0.947 | 1.044 | 1.052 |
| 137751 | SH3 domain-binding glutamic acid-rich-like protein 3 [Homo sapiens]                          | 3  | 27  | homeostasis; metabolic process                  | 1.188 | 1.044 | 1.072 |

|        |                                                                     |    |     |                                    |       |       |       |
|--------|---------------------------------------------------------------------|----|-----|------------------------------------|-------|-------|-------|
| 194374 | unnamed protein product [Homo sapiens]                              | 3  | 10  | ic process; response to stimulus   | 1.088 | 1.044 | 0.891 |
| 119591 | DnaJ (Hsp40) homolog, subfamily B, member 2, isoform CRA_b [H       | 5  | 23  | ; regulation of biological process | 0.902 | 1.044 | 0.938 |
| 194376 | unnamed protein product [Homo sapiens]                              | 8  | 24  | cell organization and biogenesis   | 1.045 | 1.043 | 1.085 |
| 403234 | eukaryotic translation initiation factor 3 [Homo sapiens]           | 27 | 121 | ; regulation of biological process | 1.018 | 1.043 | 1.008 |
| 189339 | Chain B, Crystal Structure Of 2-Enoyl Thioester Reductase Of Hum    | 2  | 4   | metabolic process                  | 0.956 | 1.042 | 1.080 |
| 131235 | mitochondrial ribosomal protein-L5 heart-specific splice-variant [H | 2  | 6   | d biogenesis; metabolic process    | 0.805 | 1.042 | 0.950 |
| 119615 | lysophospholipase II, isoform CRA_d [Homo sapiens]                  | 2  | 10  | metabolic process                  | 0.805 | 1.042 | 0.887 |
| 513137 | Chain B, Human Cohesin Inhibitor Wapl                               | 2  | 2   |                                    | 0.815 | 1.042 | 0.993 |
| 119574 | heterogeneous nuclear ribonucleoprotein H1 (H), isoform CRA_a [     | 10 | 238 | ; regulation of biological process | 1.092 | 1.042 | 1.084 |
| 114794 | Chain F, The Crystal Structure Of Human Enoyl-Coenzyme A (Coa)      | 5  | 32  | metabolic process                  | 0.884 | 1.042 | 1.032 |
| 158256 | unnamed protein product [Homo sapiens]                              | 11 | 52  | metabolic process                  | 1.085 | 1.041 | 0.990 |
| 119577 | glucocorticoid receptor DNA binding factor 1, isoform CRA_d [Hor    | 3  | 6   | component movement; transport      | 1.080 | 1.041 | 1.215 |
| 119627 | phosphopantothenoylcysteine synthetase [Homo sapiens]               | 9  | 27  | metabolic process                  | 0.974 | 1.041 | 1.038 |
| 119597 | hCG1786469 [Homo sapiens]                                           | 4  | 123 | ic process; response to stimulus   | 1.402 | 1.041 | 1.215 |
| 119583 | integrator complex subunit 9, isoform CRA_a [Homo sapiens]          | 2  | 3   | metabolic process                  | 1.123 | 1.040 | 1.160 |
| 194375 | unnamed protein product [Homo sapiens]                              | 11 | 64  | s; cellular component movement     | 1.092 | 1.040 | 1.001 |
| 119617 | within bgcn homolog (Drosophila), isoform CRA_b, partial [Homo      | 3  | 6   | cell organization and biogenesis   | 0.980 | 1.040 | 1.054 |
| 527904 | PUS7 protein, partial [Homo sapiens]                                | 2  | 5   | metabolic process                  | 1.019 | 1.040 | 0.960 |
| 530396 | PREDICTED: NADH dehydrogenase [ubiquinone] iron-sulfur protei       | 3  | 15  | cell organization and biogenesis   | 0.884 | 1.039 | 1.071 |
| 530364 | PREDICTED: nitrilase homolog 1 isoform X1 [Homo sapiens]            | 4  | 8   | metabolic process                  | 1.090 | 1.039 | 1.045 |
| 294660 | abhydrolase domain-containing protein 16A isoform b [Homo sapi      | 6  | 11  | metabolic process                  | 1.115 | 1.039 | 1.110 |
| 532686 | phospholipase A2 activating protein [Homo sapiens]                  | 9  | 15  | ; regulation of biological process | 1.027 | 1.039 | 0.986 |
| 119604 | hypothetical protein MGC3207, isoform CRA_b [Homo sapiens]          | 9  | 42  | metabolic process                  | 1.051 | 1.038 | 1.106 |
| 113407 | unnamed protein product [Homo sapiens]                              | 6  | 19  |                                    | 1.072 | 1.038 | 1.055 |
| 578800 | PREDICTED: cyclin-dependent kinase 11B isoform X7 [Homo sapie       | 3  | 6   | and biogenesis; cell proliferation | 1.092 | 1.038 | 1.098 |
| 629889 | unknown, partial [Homo sapiens]                                     | 39 | 193 | ; transport; response to stimulus  | 1.109 | 1.038 | 1.052 |
| 767939 | PREDICTED: ankyrin repeat and SAM domain-containing protein 1       | 2  | 3   | al process; response to stimulus   | 0.918 | 1.038 | 1.127 |
| 119389 | Chain A, Ct10-Regulated Kinase Isoform li                           | 5  | 13  |                                    | 1.077 | 1.038 | 1.099 |
| 737604 | thymopoietin isoform beta [Homo sapiens]                            | 9  | 69  | regulation of biological process   | 0.863 | 1.038 | 1.058 |
| 182046 | Calcium homeostasis endoplasmic reticulum protein [Homo sapie       | 2  | 12  | n of biological process; transport | 0.977 | 1.038 | 1.111 |
| 381148 | RPL13A protein, partial [Homo sapiens]                              | 6  | 55  | al process; response to stimulus   | 1.035 | 1.038 | 0.954 |
| 530400 | PREDICTED: thymopoietin isoform X2 [Homo sapiens]                   | 8  | 65  | regulation of biological process   | 0.863 | 1.038 | 1.012 |
| 767986 | PREDICTED: CREB-binding protein isoform X5 [Homo sapiens]           | 6  | 13  | l proliferation; defense response  | 1.217 | 1.037 | 1.196 |
| 119610 | syntaxin 8, isoform CRA_b, partial [Homo sapiens]                   | 3  | 5   | ; regulation of biological process | 1.045 | 1.037 | 0.941 |
| 298373 | phenylalanine hydroxylase-stimulating protein, pterin-4 alpha-carb  | 3  | 7   | metabolic process                  | 0.759 | 1.037 | 0.937 |
| 119571 | hypothetical protein FLJ13611, isoform CRA_d [Homo sapiens]         | 2  | 5   |                                    | 1.045 | 1.037 | 1.160 |
| 767913 | PREDICTED: T-complex protein 1 subunit eta isoform X1 [Homo sa      | 16 | 147 | metabolic process; transport       | 1.118 | 1.036 | 1.046 |
| 158259 | unnamed protein product [Homo sapiens]                              | 10 | 104 | e to stimulus; metabolic process   | 1.045 | 1.036 | 1.065 |
| 483765 | RPS4X protein, partial [Homo sapiens]                               | 11 | 91  | ; regulation of biological process | 1.021 | 1.036 | 0.966 |
| 171027 | dihyrolipoamide acetyl transferase, partial [Homo sapiens]          | 2  | 10  | ; regulation of biological process | 1.030 | 1.036 | 0.968 |

|        |                                                                    |    |     |                                      |       |       |       |
|--------|--------------------------------------------------------------------|----|-----|--------------------------------------|-------|-------|-------|
| 767946 | PREDICTED: protein FAM3C isoform X1 [Homo sapiens]                 | 4  | 18  | cell organization and biogenesis     | 0.908 | 1.036 | 1.008 |
| 381970 | SLC25A25 protein, partial [Homo sapiens]                           | 4  | 7   | us; metabolic process; transport     | 1.047 | 1.035 | 1.015 |
| 609412 | Chain D, Crystal Structure Of Human Lnkx2b-h2a.z-anp32e            | 11 | 311 |                                      | 1.176 | 1.035 | 1.023 |
| 194384 | unnamed protein product [Homo sapiens]                             | 6  | 32  | metabolic process                    | 1.275 | 1.034 | 1.022 |
| 110102 | pyruvate carboxylase precursor [Homo sapiens]                      | 17 | 49  | ; regulation of biological process   | 1.012 | 1.034 | 0.967 |
| 382017 | probable ATP-dependent RNA helicase DDX17 isoform 1 [Homo sa       | 22 | 169 | ; regulation of biological process   | 1.130 | 1.034 | 0.993 |
| 310444 | LEM domain-containing protein 2 isoform 1 [Homo sapiens]           | 4  | 13  | ; regulation of biological process   | 0.864 | 1.034 | 1.048 |
| 514768 | hypothetical protein, partial [Homo sapiens]                       | 6  | 12  | ent movement; defense response       | 0.893 | 1.033 | 0.972 |
| 364505 | Chain A, Crystal Structure Of The Apo-Form Of Human Ck2 Alpha      | 6  | 26  | metabolic process                    | 1.020 | 1.033 | 0.951 |
| 119592 | electron-transfer-flavoprotein, beta polypeptide [Homo sapiens]    | 12 | 95  | metabolic process                    | 1.031 | 1.033 | 1.048 |
| 768011 | PREDICTED: symplekin isoform X2 [Homo sapiens]                     | 5  | 16  | ; regulation of biological process   | 0.850 | 1.033 | 0.985 |
| 159164 | Chain X, Nmr Structure Of Card D2 Domain                           | 3  | 14  |                                      | 0.850 | 1.033 | 1.106 |
| 119591 | ribosomal protein L22, isoform CRA_b [Homo sapiens]                | 3  | 35  | sis; transport; cell differentiation | 0.964 | 1.033 | 0.998 |
| 450347 | elongation factor 1-alpha 2 [Homo sapiens]                         | 11 | 124 | ; regulation of biological process   | 0.992 | 1.033 | 0.993 |
| 703093 | serine hydroxymethyltransferase, partial [Homo sapiens]            | 15 | 97  | cell organization and biogenesis     | 0.960 | 1.033 | 1.036 |
| 194379 | unnamed protein product [Homo sapiens]                             | 7  | 35  | ; regulation of biological process   | 0.931 | 1.032 | 1.098 |
| 127112 | dsRNA adenosine deaminase [Homo sapiens]                           | 17 | 89  | nd biogenesis; defense response      | 1.003 | 1.032 | 1.042 |
| 116023 | methylthioadenosine phosphorylase [Homo sapiens]                   | 5  | 10  | metabolic process                    | 1.025 | 1.032 | 0.915 |
| 119608 | heat shock 70kDa protein 5 (glucose-regulated protein, 78kDa), iso | 29 | 535 | coagulation; cell communication      | 1.007 | 1.032 | 1.077 |
| 768025 | PREDICTED: ubiquitin fusion degradation protein 1 homolog isofo    | 4  | 12  | ; response to stimulus; transport    | 1.078 | 1.032 | 1.071 |
| 524933 | Chain A, Structure Of Otud2 Otu Domain                             | 2  | 2   |                                      | 0.967 | 1.032 | 1.003 |
| 767938 | PREDICTED: 60S ribosomal protein L26-like 1 isoform X1 [Homo s     | 7  | 44  | zation and biogenesis; transport     | 1.137 | 1.031 | 1.120 |
| 194375 | unnamed protein product [Homo sapiens]                             | 17 | 104 | ; regulation of biological process   | 1.007 | 1.031 | 0.996 |
| 142501 | Dolichyl-phosphate mannosyltransferase polypeptide 1, catalytic s  | 5  | 23  | metabolic process                    | 1.227 | 1.031 | 1.161 |
| 530369 | PREDICTED: U3 small nucleolar ribonucleoprotein protein IMP4 is    | 2  | 6   | metabolic process                    | 1.035 | 1.031 | 1.036 |
| 119584 | STT3, subunit of the oligosaccharyltransferase complex, homolog    | 15 | 108 | ic process; response to stimulus     | 1.163 | 1.031 | 1.029 |
| 205216 | KIAA0899 protein [Homo sapiens]                                    | 23 | 100 | n; cellular component movement       | 1.101 | 1.031 | 0.970 |
| 149171 | hTAFII100 [Homo sapiens]                                           | 4  | 7   | cell organization and biogenesis     | 1.172 | 1.030 | 0.994 |
| 347850 | FBL protein, partial [Homo sapiens]                                | 12 | 87  | cell organization and biogenesis     | 1.006 | 1.030 | 1.002 |
| 119611 | importin 9, isoform CRA_b [Homo sapiens]                           | 9  | 27  | transport                            | 1.112 | 1.030 | 1.022 |
| 119579 | leukotriene B4 12-hydroxydehydrogenase, isoform CRA_b [Homo s      | 7  | 23  | ic process; response to stimulus     | 1.135 | 1.030 | 1.032 |
| 530396 | PREDICTED: tetratricopeptide repeat protein 9C isoform X1 [Homo    | 2  | 7   | metabolic process                    | 0.988 | 1.030 | 1.025 |
| 140178 | KIAA1797 protein, partial [Homo sapiens]                           | 9  | 19  |                                      | 0.935 | 1.030 | 0.940 |
| 578831 | PREDICTED: SWI/SNF-related matrix-associated actin-dependent r     | 4  | 12  | ; regulation of biological process   | 0.956 | 1.030 | 1.011 |
| 189053 | unnamed protein product [Homo sapiens]                             | 6  | 29  | metabolic process; transport         | 1.034 | 1.030 | 1.028 |
| 221040 | unnamed protein product [Homo sapiens]                             | 9  | 18  | transport; coagulation               | 0.966 | 1.029 | 1.014 |
| 194374 | unnamed protein product [Homo sapiens]                             | 8  | 24  | metabolic process                    | 0.960 | 1.029 | 1.077 |
| 158260 | unnamed protein product [Homo sapiens]                             | 12 | 67  | al process; cellular homeostasis     | 1.055 | 1.029 | 1.030 |
| 326634 | Chain A, X-ray Structure Of Human Butyrylcholinesterase Inhibited  | 4  | 7   | metabolic process                    | 1.100 | 1.029 | 1.036 |
| 119605 | ribosomal protein L18a, isoform CRA_b [Homo sapiens]               | 6  | 51  | zation and biogenesis; transport     | 1.005 | 1.029 | 0.910 |

|        |                                                                          |    |     |                                                    |       |       |       |
|--------|--------------------------------------------------------------------------|----|-----|----------------------------------------------------|-------|-------|-------|
| 530400 | PREDICTED: nuclear pore complex protein Nup107 isoform X1 [Homo sapiens] | 6  | 16  | transport; response to stimulus                    | 1.011 | 1.029 | 1.062 |
| 119581 | keratin 20 [Homo sapiens]                                                | 3  | 29  | regulation of biological process                   | 1.022 | 1.028 | 0.927 |
| 157834 | Chain A, Aldehyde Reductase                                              | 7  | 52  | metabolic process                                  | 0.915 | 1.028 | 1.200 |
| 114794 | Chain A, Crystal Structure Of Human Carbonyl Reductase 3, Comp           | 8  | 35  | metabolic process                                  | 0.976 | 1.028 | 1.127 |
| 767979 | PREDICTED: RAC-alpha serine/threonine-protein kinase isoform X           | 9  | 15  | cell organization and biogenesis                   | 1.022 | 1.028 | 1.129 |
| 117390 | spliceosome associated protein [Homo sapiens]                            | 9  | 52  | metabolic process                                  | 0.967 | 1.027 | 1.020 |
| 767903 | PREDICTED: protein argonaute-1 isoform X4 [Homo sapiens]                 | 3  | 8   | cell organization and biogenesis; defense response | 0.924 | 1.027 | 0.975 |
| 158512 | isopeptidase T                                                           | 12 | 87  | metabolic process                                  | 1.032 | 1.027 | 1.048 |
| 158261 | unnamed protein product [Homo sapiens]                                   | 17 | 119 | response to stimulus; transport                    | 1.012 | 1.027 | 1.003 |
| 476787 | YWHAH [Homo sapiens]                                                     | 10 | 116 | cell organization and biogenesis                   | 0.988 | 1.027 | 1.008 |
| 323071 | UDP-N-acetylglucosamine--peptide N-acetylglucosaminyltransferase         | 4  | 5   | cell death; response to stimulus                   | 1.013 | 1.026 | 1.125 |
| 119598 | optic atrophy 1 (autosomal dominant), isoform CRA_b [Homo sapiens]       | 16 | 56  | cellular process; response to stimulus             | 0.935 | 1.026 | 0.962 |
| 119623 | superkiller viralicidic activity 2-like (S. cerevisiae), isoform CRA_b   | 4  | 7   | metabolic process                                  | 0.966 | 1.026 | 1.002 |
| 221044 | unnamed protein product [Homo sapiens]                                   | 10 | 32  | transport; metabolic process                       | 1.122 | 1.026 | 1.031 |
| 104360 | RNA binding motif protein 8B [Homo sapiens]                              | 3  | 24  | regulation of biological process; transport        | 1.132 | 1.025 | 1.156 |
| 119595 | chromosome 20 open reading frame 14, isoform CRA_d [Homo sapiens]        | 16 | 76  | regulation of biological process                   | 1.009 | 1.025 | 1.051 |
| 221041 | unnamed protein product [Homo sapiens]                                   | 5  | 37  | cell organization and biogenesis; transport        | 1.064 | 1.025 | 1.038 |
| 616805 | Chain A, Structural Basis For Recruitment Of Ubc12 By An E2-Binding      | 3  | 40  |                                                    | 1.013 | 1.025 | 1.051 |
| 189067 | unnamed protein product [Homo sapiens]                                   | 2  | 16  | transport                                          | 0.998 | 1.025 | 1.115 |
| 756142 | Chain b, Human Constitutive 20s Proteasome In Complex With Cap1          | 5  | 14  |                                                    | 0.941 | 1.025 | 0.979 |
| 133251 | C11orf68 protein, partial [Homo sapiens]                                 | 3  | 8   |                                                    | 1.136 | 1.024 | 1.091 |
| 322858 | calcium modulating cyclophilin ligand CAMLG, partial [Homo sapiens]      | 2  | 9   | regulation of biological process                   | 0.973 | 1.024 | 1.059 |
| 409797 | unnamed protein product, partial [Homo sapiens]                          | 2  | 4   |                                                    | 1.169 | 1.024 | 0.981 |
| 221043 | unnamed protein product [Homo sapiens]                                   | 6  | 16  | response; response to stimulus                     | 0.971 | 1.024 | 0.989 |
| 189054 | unnamed protein product [Homo sapiens]                                   | 10 | 73  | regulation of biological process                   | 1.170 | 1.023 | 1.067 |
| 158260 | unnamed protein product [Homo sapiens]                                   | 9  | 30  | transport; metabolic process                       | 1.305 | 1.023 | 0.985 |
| 530372 | PREDICTED: acylamino-acid-releasing enzyme isoform X6 [Homo sapiens]     | 12 | 51  | cell organization and biogenesis                   | 1.006 | 1.023 | 0.993 |
| 119578 | polymerase (RNA) I polypeptide E, 53kDa, isoform CRA_a [Homo sapiens]    | 4  | 13  | regulation of biological process                   | 0.988 | 1.023 | 0.970 |
| 702373 | unnamed protein product [Homo sapiens]                                   | 3  | 8   | cellular differentiation; metabolic process        | 1.067 | 1.023 | 0.918 |
| 338968 | cold shock domain-containing protein E1 isoform 2 [Homo sapiens]         | 7  | 22  | cellular process; metabolic process                | 0.979 | 1.023 | 0.885 |
| 767952 | PREDICTED: protein argonaute-2 isoform X4 [Homo sapiens]                 | 10 | 25  | cell organization and biogenesis; defense response | 0.935 | 1.023 | 1.018 |
| 768277 | STRN protein [Homo sapiens]                                              | 4  | 6   | cell organization and biogenesis                   | 0.830 | 1.022 | 0.908 |
| 141797 | IQ motif containing GTPase activating protein 1 [Homo sapiens]           | 34 | 200 | response to stimulus; cell growth                  | 1.089 | 1.022 | 1.052 |
| 119611 | KIAA0859, isoform CRA_d [Homo sapiens]                                   | 4  | 6   | metabolic process                                  | 0.874 | 1.022 | 1.041 |
| 219753 | unnamed protein product, partial [Homo sapiens]                          | 3  | 5   |                                                    | 0.738 | 1.021 | 0.888 |
| 628976 | elongation protein 3 homolog, partial [Homo sapiens]                     | 8  | 26  | regulation of biological process; transport        | 1.025 | 1.020 | 1.007 |
| 104328 | unnamed protein product [Homo sapiens]                                   | 5  | 21  | cell organization and biogenesis                   | 0.876 | 1.020 | 1.006 |
| 684146 | HSPC120 [Homo sapiens]                                                   | 7  | 64  | cellular process; transport; cell growth           | 0.994 | 1.019 | 0.952 |
| 333539 | TNRC11, partial [Homo sapiens]                                           | 2  | 4   | cellular process; response to stimulus             | 1.054 | 1.019 | 1.070 |
| 119599 | G elongation factor, mitochondrial 1, isoform CRA_c [Homo sapiens]       | 8  | 30  | cell organization and biogenesis                   | 1.171 | 1.019 | 1.091 |



|        |                                                                   |    |     |                                          |       |       |       |
|--------|-------------------------------------------------------------------|----|-----|------------------------------------------|-------|-------|-------|
| 194375 | unnamed protein product [Homo sapiens]                            | 9  | 249 | abolic process; cell proliferation       | 1.018 | 1.019 | 1.086 |
| 392996 | UV excision repair protein RAD23 homolog A isoform 3 [Homo sap    | 7  | 34  | ; regulation of biological process       | 1.057 | 1.019 | 0.927 |
| 194380 | unnamed protein product [Homo sapiens]                            | 13 | 62  | metabolic process                        | 1.009 | 1.019 | 0.965 |
| 193787 | unnamed protein product [Homo sapiens]                            | 2  | 5   | e to stimulus; metabolic process         | 1.007 | 1.019 | 1.237 |
| 119628 | neurobeachin, isoform CRA_c [Homo sapiens]                        | 12 | 22  | transport                                | 1.103 | 1.018 | 1.116 |
| 767902 | PREDICTED: zinc transporter 7 isoform X1 [Homo sapiens]           | 4  | 13  | ; regulation of biological process       | 0.839 | 1.018 | 0.876 |
| 409753 | unnamed protein product, partial [Homo sapiens]                   | 2  | 3   |                                          | 0.852 | 1.018 | 0.954 |
| 468071 | CGI-39 protein [Homo sapiens]                                     | 4  | 27  |                                          | 1.143 | 1.018 | 0.970 |
| 119593 | ARD1 homolog A, N-acetyltransferase (S. cerevisiae), isoform CRA  | 2  | 13  | d biogenesis; metabolic process          | 1.040 | 1.017 | 1.010 |
| 203790 | Rho GDP dissociation inhibitor alpha [Homo sapiens]               | 5  | 45  | al process; response to stimulus         | 1.227 | 1.016 | 0.894 |
| 203282 | Chain B, Crystal Structure Of Human Protein Kinase Ck2 Regulator  | 4  | 18  |                                          | 1.058 | 1.016 | 1.025 |
| 189069 | unnamed protein product [Homo sapiens]                            | 12 | 84  | biogenesis; response to stimulus         | 1.078 | 1.016 | 1.016 |
| 578819 | PREDICTED: heterogeneous nuclear ribonucleoprotein H3 isoform     | 7  | 133 | biological process; cell differentiation | 1.007 | 1.016 | 1.052 |
| 104390 | unnamed protein product [Homo sapiens]                            | 2  | 5   | biological process; cell division        | 0.722 | 1.016 | 0.918 |
| 194378 | unnamed protein product [Homo sapiens]                            | 13 | 55  | cell organization and biogenesis         | 1.097 | 1.016 | 0.998 |
| 767930 | PREDICTED: sister chromatid cohesion protein PDS5 homolog A i     | 10 | 22  | f biological process; cell division      | 1.035 | 1.016 | 0.971 |
| 530410 | PREDICTED: flotillin-2 isoform X3 [Homo sapiens]                  | 4  | 14  | ; regulation of biological process       | 1.002 | 1.016 | 1.000 |
| 166955 | RBP-MS/type 5, partial [Homo sapiens]                             | 2  | 5   | ; regulation of biological process       | 0.843 | 1.015 | 1.004 |
| 347829 | CAND1 protein, partial [Homo sapiens]                             | 21 | 77  | ; regulation of biological process       | 1.098 | 1.015 | 1.010 |
| 119622 | adaptor-related protein complex 3, sigma 2 subunit, isoform CRA   | 3  | 11  | rt; cellular component movement          | 0.981 | 1.014 | 0.867 |
| 119620 | metastasis associated 1 family, member 3, isoform CRA_d [Homo     | 6  | 22  | ; regulation of biological process       | 0.963 | 1.014 | 1.008 |
| 194385 | unnamed protein product [Homo sapiens]                            | 13 | 78  | metabolic process                        | 1.060 | 1.014 | 1.023 |
| 751130 | 6-phosphogluconate dehydrogenase, decarboxylating isoform 2 [H    | 13 | 78  | metabolic process                        | 1.053 | 1.014 | 1.023 |
| 319918 | CORO7-PAM16 protein [Homo sapiens]                                | 3  | 7   |                                          | 0.899 | 1.014 | 0.982 |
| 119606 | GDP dissociation inhibitor 2, isoform CRA_a [Homo sapiens]        | 18 | 159 | us; transport; metabolic process         | 1.198 | 1.013 | 1.033 |
| 119580 | NHP2 non-histone chromosome protein 2-like 1 (S. cerevisiae), iso | 2  | 9   | metabolic process                        | 0.940 | 1.013 | 1.097 |
| 152775 | ACTB protein, partial [Homo sapiens]                              | 14 | 895 | ; coagulation; defense response          | 1.138 | 1.013 | 0.990 |
| 189053 | unnamed protein product [Homo sapiens]                            | 10 | 85  | ; transport; response to stimulus        | 1.144 | 1.013 | 0.992 |
| 407943 | Chain C, Crystal Structure Of Mif L46g Mutant                     | 2  | 65  |                                          | 1.140 | 1.013 | 0.716 |
| 119587 | radixin, isoform CRA_c [Homo sapiens]                             | 13 | 63  | biogenesis; response to stimulus         | 0.964 | 1.013 | 1.043 |
| 767936 | PREDICTED: lysine-specific demethylase 3B isoform X2 [Homo sa     | 5  | 10  | al process; response to stimulus         | 1.331 | 1.013 | 1.105 |
| 193785 | unnamed protein product [Homo sapiens]                            | 2  | 4   | nd biogenesis; defense response          | 0.957 | 1.013 | 0.956 |
| 119614 | WD repeat domain 68, isoform CRA_a [Homo sapiens]                 | 2  | 8   | development; metabolic process           | 1.055 | 1.013 | 1.012 |
| 530370 | PREDICTED: mitochondrial chaperone BCS1 isoform X3 [Homo sa       | 2  | 3   | cell organization and biogenesis         | 0.990 | 1.012 | 1.090 |
| 583966 | isocitrate dehydrogenase [NADP], mitochondrial isoform 2 [Homo    | 18 | 163 | metabolic process                        | 1.081 | 1.012 | 1.048 |
| 119604 | nuclear respiratory factor 1, isoform CRA_c [Homo sapiens]        | 2  | 8   | cell organization and biogenesis         | 0.900 | 1.012 | 0.969 |
| 767908 | PREDICTED: torsin-1A-interacting protein 2 isoform X2 [Homo sap   | 3  | 5   | ; regulation of biological process       | 0.911 | 1.012 | 0.949 |
| 337580 | ribosomal protein L3, partial [Homo sapiens]                      | 16 | 88  | ; transport; response to stimulus        | 1.143 | 1.012 | 0.995 |
| 264681 | WD repeat-containing protein 26 isoform b [Homo sapiens]          | 4  | 17  |                                          | 1.124 | 1.012 | 1.116 |
| 119605 | ATPase type 13A1, isoform CRA_f [Homo sapiens]                    | 10 | 39  | ; transport; cellular homeostasis        | 0.981 | 1.012 | 1.013 |

|        |                                                                              |    |     |                                                   |       |       |       |
|--------|------------------------------------------------------------------------------|----|-----|---------------------------------------------------|-------|-------|-------|
| 767948 | PREDICTED: solute carrier family 25 member 40 isoform X3 [Homo sapiens]      | 3  | 7   | transport                                         | 0.897 | 1.011 | 1.075 |
| 546968 | tyrosine 3-monooxygenase/tryptophan 5-monooxygenase activator                | 11 | 139 | cell organization and biogenesis                  | 1.018 | 1.011 | 1.005 |
| 119586 | ribosomal protein L36a-like [Homo sapiens]                                   | 3  | 21  | metabolic process                                 | 1.126 | 1.011 | 0.895 |
| 396447 | EEF1G protein, partial [Homo sapiens]                                        | 17 | 165 | cellular process; response to stimulus            | 1.038 | 1.010 | 1.013 |
| 140428 | unnamed protein product [Homo sapiens]                                       | 2  | 4   | metabolic process                                 | 1.132 | 1.010 | 0.986 |
| 201511 | Chain F, Structure Of Human Glutamate Dehydrogenase-Apo Form                 | 14 | 96  | metabolic process                                 | 1.097 | 1.010 | 1.051 |
| 119624 | family with sequence similarity 62 (C2 domain containing) member             | 8  | 27  | transport                                         | 1.031 | 1.010 | 0.959 |
| 530388 | PREDICTED: DNA replication licensing factor MCM4 isoform X1 [Homo sapiens]   | 11 | 36  | metabolic process                                 | 0.986 | 1.010 | 0.987 |
| 333395 | crn-related protein kim1 [Homo sapiens]                                      | 10 | 35  | cellular process; response to stimulus            | 0.917 | 1.009 | 0.982 |
| 119630 | chaperonin containing TCP1, subunit 8 (theta), isoform CRA_a [Homo sapiens]  | 23 | 233 | cellular process; response to stimulus; transport | 1.131 | 1.009 | 1.035 |
| 331507 | ATP-dependent RNA helicase [Homo sapiens]                                    | 2  | 3   | metabolic process                                 | 0.818 | 1.009 | 0.944 |
| 348679 | dipeptidylpeptidase 9 short form [Homo sapiens]                              | 4  | 11  | metabolic process                                 | 0.809 | 1.009 | 0.893 |
| 131218 | unnamed protein product [Homo sapiens]                                       | 4  | 27  |                                                   | 0.826 | 1.009 | 0.824 |
| 767993 | PREDICTED: AP-2 complex subunit beta isoform X5 [Homo sapiens]               | 18 | 75  | cellular process; response to stimulus; transport | 1.002 | 1.009 | 0.954 |
| 130973 | RAP2C, member of RAS oncogene family [Homo sapiens]                          | 2  | 6   | cellular process; response to stimulus; transport | 1.017 | 1.009 | 1.079 |
| 109863 | fragile X mental retardation syndrome related protein [Homo sapiens]         | 8  | 24  | regulation of biological process                  | 0.991 | 1.008 | 1.042 |
| 659926 | hypothetical protein, partial [Homo sapiens]                                 | 7  | 15  | regulation of biological process                  | 1.142 | 1.008 | 0.993 |
| 768045 | PREDICTED: phosphatidylinositol 5-phosphate 4-kinase type-2 beta             | 2  | 9   | cellular process; response to stimulus            | 0.884 | 1.008 | 1.013 |
| 119568 | protein tyrosine phosphatase, receptor type, K, isoform CRA_e [Homo sapiens] | 2  | 4   | cellular process; response to stimulus; transport | 0.880 | 1.008 | 1.113 |
| 119603 | peptidase (mitochondrial processing) beta, isoform CRA_d [Homo sapiens]      | 5  | 23  | metabolic process; transport                      | 0.972 | 1.008 | 0.918 |
| 186062 | VPRBP protein [Homo sapiens]                                                 | 3  | 7   | cellular process; response to stimulus; transport | 0.731 | 1.008 | 1.008 |
| 194386 | unnamed protein product [Homo sapiens]                                       | 2  | 2   | cellular process; response to stimulus; transport | 0.975 | 1.007 | 0.984 |
| 116667 | Chain E, Crystal Structure Of P5cr Complexed With Nadh                       | 7  | 108 | metabolic process                                 | 1.117 | 1.007 | 0.973 |
| 164691 | unnamed protein product, partial [Homo sapiens]                              | 7  | 23  | cellular process; response to stimulus            | 0.974 | 1.007 | 0.943 |
| 834051 | RELA protein [Homo sapiens]                                                  | 10 | 35  | cellular process; defense response                | 0.928 | 1.007 | 1.064 |
| 119613 | DEAH (Asp-Glu-Ala-His) box polypeptide 15, isoform CRA_h [Homo sapiens]      | 22 | 114 | metabolic process                                 | 1.051 | 1.006 | 0.993 |
| 119583 | proline synthetase co-transcribed homolog (bacterial), isoform CR            | 2  | 10  | metabolic process                                 | 0.981 | 1.006 | 0.902 |
| 525458 | hypothetical protein, partial [Homo sapiens]                                 | 6  | 12  | regulation of biological process                  | 0.862 | 1.006 | 1.010 |
| 119602 | glycosylphosphatidylinositol anchor attachment protein 1 homolog             | 6  | 18  | cellular process; response to stimulus; transport | 0.933 | 1.006 | 0.916 |
| 194383 | unnamed protein product [Homo sapiens]                                       | 7  | 178 | regulation of biological process                  | 1.075 | 1.005 | 1.047 |
| 119571 | coiled-coil domain containing 43, isoform CRA_a [Homo sapiens]               | 2  | 6   |                                                   | 1.171 | 1.005 | 1.051 |
| 119583 | farnesyltransferase, CAAX box, alpha, isoform CRA_d [Homo sapiens]           | 3  | 9   | response to stimulus; metabolic process           | 1.144 | 1.005 | 1.084 |
| 189053 | unnamed protein product [Homo sapiens]                                       | 8  | 84  | cellular process; response to stimulus; transport | 1.152 | 1.004 | 0.994 |
| 282165 | transmembrane emp24 domain-containing protein 5 isoform 1 pre                | 2  | 17  | cellular process; response to stimulus; transport | 0.863 | 1.004 | 1.033 |
| 547234 | RRP12-like protein isoform 3 [Homo sapiens]                                  | 12 | 32  |                                                   | 0.921 | 1.004 | 1.022 |
| 158255 | unnamed protein product [Homo sapiens]                                       | 13 | 33  | metabolic process                                 | 1.034 | 1.004 | 0.980 |
| 189054 | unnamed protein product [Homo sapiens]                                       | 2  | 5   | cellular process; response to stimulus; transport | 1.018 | 1.004 | 0.944 |
| 767971 | PREDICTED: importin-8 isoform X4 [Homo sapiens]                              | 3  | 7   | response to stimulus; metabolic process           | 0.954 | 1.004 | 1.019 |
| 158255 | unnamed protein product [Homo sapiens]                                       | 3  | 9   | cellular process; metabolic process               | 1.089 | 1.004 | 0.935 |
| 675969 | Chain A, Crystal Structure Of Human Stromal Antigen 2 (sa2) In Co            | 6  | 13  |                                                   | 0.952 | 1.003 | 1.052 |

|        |                                                                                                  |    |     |                                    |       |       |       |
|--------|--------------------------------------------------------------------------------------------------|----|-----|------------------------------------|-------|-------|-------|
| 663429 | protein transport protein Sec31A isoform 6 [Homo sapiens]                                        | 14 | 46  | cell organization and biogenesis   | 0.936 | 1.003 | 0.994 |
| 158257 | unnamed protein product [Homo sapiens]                                                           | 9  | 24  | cell organization and biogenesis   | 0.897 | 1.003 | 1.006 |
| 119572 | adaptor-related protein complex 2, alpha 1 subunit, isoform CRA_a                                | 25 | 109 | n; cellular component movement     | 1.053 | 1.003 | 0.973 |
| 578839 | PREDICTED: ATP-dependent RNA helicase DDX3Y isoform X1 [Homo sapiens]                            | 13 | 85  | ; regulation of biological process | 1.050 | 1.003 | 0.904 |
| 563966 | EH-domain containing protein testilin [Homo sapiens]                                             | 7  | 20  | biogenesis; response to stimulus   | 0.964 | 1.003 | 0.949 |
| 209870 | Chain C, Crystal Structure Of The Human Copii-Coat Protein Sec24                                 | 17 | 103 | transport                          | 0.974 | 1.003 | 0.989 |
| 194387 | unnamed protein product [Homo sapiens]                                                           | 4  | 21  | ization and biogenesis; transport  | 1.074 | 1.002 | 1.009 |
| 530411 | PREDICTED: Golgi SNAP receptor complex member 1 isoform X1 [Homo sapiens]                        | 2  | 4   | ; regulation of biological process | 0.968 | 1.002 | 1.049 |
| 578799 | PREDICTED: mRNA turnover protein 4 homolog isoform X1 [Homo sapiens]                             | 4  | 16  |                                    | 0.943 | 1.002 | 1.028 |
| 189069 | unnamed protein product [Homo sapiens]                                                           | 3  | 16  |                                    | 1.238 | 1.002 | 0.974 |
| 102296 | HuR RNA binding protein [Homo sapiens]                                                           | 11 | 119 | ; regulation of biological process | 0.998 | 1.001 | 0.968 |
| 119594 | zinc finger protein-like 1, isoform CRA_b, partial [Homo sapiens]                                | 3  | 5   | n of biological process; transport | 1.178 | 1.001 | 0.842 |
| 194383 | unnamed protein product [Homo sapiens]                                                           | 15 | 106 | cell organization and biogenesis   | 1.032 | 1.001 | 1.033 |
| 194386 | unnamed protein product [Homo sapiens]                                                           | 3  | 10  | metabolic process                  | 0.953 | 1.001 | 1.049 |
| 197210 | uridine monophosphate synthetase isoform G [Homo sapiens]                                        | 9  | 32  | ; transport; response to stimulus  | 1.070 | 1.001 | 1.097 |
| 118764 | VWA2 protein [Homo sapiens]                                                                      | 2  | 5   | cell organization and biogenesis   | 0.887 | 1.001 | 1.024 |
| 767981 | PREDICTED: L-2-hydroxyglutarate dehydrogenase, mitochondrial isoform X1 [Homo sapiens]           | 9  | 42  | metabolic process                  | 0.905 | 1.001 | 0.964 |
| 193785 | unnamed protein product [Homo sapiens]                                                           | 7  | 24  | d biogenesis; metabolic process    | 1.022 | 1.000 | 0.994 |
| 221042 | unnamed protein product [Homo sapiens]                                                           | 27 | 228 | ; regulation of biological process | 1.058 | 1.000 | 0.982 |
| 409762 | unnamed protein product, partial [Homo sapiens]                                                  | 3  | 10  |                                    | 1.475 | 1.000 | 0.955 |
| 767910 | PREDICTED: threonine--tRNA ligase, mitochondrial isoform X1 [Homo sapiens]                       | 7  | 32  | metabolic process                  | 0.904 | 1.000 | 1.014 |
| 221043 | unnamed protein product [Homo sapiens]                                                           | 3  | 24  | metabolic process                  | 0.895 | 0.999 | 0.916 |
| 119623 | histone 1, H2bl [Homo sapiens]                                                                   | 9  | 249 | cell organization and biogenesis   | 1.225 | 0.999 | 0.972 |
| 400417 | unnamed protein product, partial [Homo sapiens]                                                  | 12 | 96  |                                    | 1.172 | 0.999 | 0.976 |
| 189053 | unnamed protein product [Homo sapiens]                                                           | 2  | 6   | metabolic process                  | 1.058 | 0.999 | 0.952 |
| 119576 | nucleolar complex associated 2 homolog (S. cerevisiae), isoform C                                | 5  | 16  | ; transport; response to stimulus  | 0.923 | 0.998 | 0.936 |
| 530370 | PREDICTED: tubulin alpha-4A chain isoform X1 [Homo sapiens]                                      | 15 | 416 | tion and biogenesis; coagulation   | 1.134 | 0.998 | 1.026 |
| 338745 | SYNCRIP protein, partial [Homo sapiens]                                                          | 11 | 58  | al process; response to stimulus   | 0.946 | 0.998 | 0.960 |
| 407880 | ubiquitin-specific proteinase 34 [Homo sapiens]                                                  | 2  | 3   | al process; response to stimulus   | 0.801 | 0.998 | 0.902 |
| 530374 | PREDICTED: presenilins-associated rhomboid-like protein, mitochondrial isoform X1 [Homo sapiens] | 2  | 5   | ; regulation of biological process | 1.229 | 0.998 | 0.918 |
| 190117 | PML-1 [Homo sapiens]                                                                             | 3  | 6   | homeostasis; defense response      | 0.985 | 0.998 | 1.047 |
| 530415 | PREDICTED: cell adhesion molecule 4 isoform X1 [Homo sapiens]                                    | 4  | 13  |                                    | 1.168 | 0.998 | 1.056 |
| 767985 | PREDICTED: kunitz-type protease inhibitor 1 isoform X3 [Homo sapiens]                            | 2  | 5   | cell organization and biogenesis   | 0.895 | 0.997 | 1.115 |
| 119623 | heterogeneous nuclear ribonucleoprotein H2 (H') [Homo sapiens]                                   | 9  | 114 | metabolic process                  | 1.005 | 0.997 | 1.019 |
| 767989 | PREDICTED: diphosphomevalonate decarboxylase isoform X3 [Homo sapiens]                           | 6  | 21  | ; regulation of biological process | 1.240 | 0.997 | 0.958 |
| 189066 | unnamed protein product [Homo sapiens]                                                           | 3  | 60  | regulation of biological process   | 1.077 | 0.997 | 0.959 |
| 232005 | Mina53 form-3 [Homo sapiens]                                                                     | 2  | 3   | gical process; metabolic process   | 0.851 | 0.997 | 0.982 |
| 194379 | unnamed protein product [Homo sapiens]                                                           | 2  | 6   | ; regulation of biological process | 0.974 | 0.996 | 0.948 |
| 119582 | transcription elongation regulator 1, isoform CRA_c [Homo sapiens]                               | 8  | 19  | gical process; metabolic process   | 0.925 | 0.996 | 0.992 |
| 126557 | prune protein [Homo sapiens]                                                                     | 3  | 9   |                                    | 0.750 | 0.996 | 0.960 |

|        |                                                                      |    |     |                                    |       |       |       |
|--------|----------------------------------------------------------------------|----|-----|------------------------------------|-------|-------|-------|
| 767994 | PREDICTED: lethal(2) giant larvae protein homolog 2 isoform X6 [H    | 10 | 34  | tion and biogenesis; cell division | 1.130 | 0.996 | 0.988 |
| 119616 | hCG1979897, isoform CRA_b [Homo sapiens]                             | 2  | 11  |                                    | 0.955 | 0.996 | 1.042 |
| 221042 | unnamed protein product [Homo sapiens]                               | 14 | 69  | cell organization and biogenesis   | 1.142 | 0.995 | 1.012 |
| 119589 | translocase of inner mitochondrial membrane 13 homolog (yeast),      | 2  | 19  | cell organization and biogenesis   | 0.914 | 0.995 | 0.938 |
| 178340 | haymaker protein, partial [Homo sapiens]                             | 3  | 20  | ; regulation of biological process | 1.151 | 0.995 | 0.978 |
| 119609 | exocyst complex component 7, isoform CRA_d [Homo sapiens]            | 2  | 4   | ; regulation of biological process | 1.149 | 0.995 | 1.019 |
| 150794 | RNA methyltransferase like 1 [Homo sapiens]                          | 2  | 9   | metabolic process                  | 1.162 | 0.995 | 1.154 |
| 318746 | hypothetical protein [Homo sapiens]                                  | 3  | 5   | response; response to stimulus     | 1.128 | 0.995 | 1.140 |
| 119587 | adenine phosphoribosyltransferase, isoform CRA_b [Homo sapien        | 7  | 65  | ; transport; response to stimulus  | 1.055 | 0.994 | 1.020 |
| 767970 | PREDICTED: sortilin-related receptor isoform X1 [Homo sapiens]       | 6  | 11  | e to stimulus; metabolic process   | 0.964 | 0.994 | 0.962 |
| 119618 | hCG1782202, isoform CRA_c [Homo sapiens]                             | 6  | 44  | al process; response to stimulus   | 1.163 | 0.994 | 0.976 |
| 767979 | PREDICTED: FACT complex subunit SPT16 isoform X1 [Homo sap           | 30 | 214 | ; regulation of biological process | 1.086 | 0.994 | 1.029 |
| 481455 | PTK9L [Homo sapiens]                                                 | 4  | 9   | biogenesis; response to stimulus   | 1.112 | 0.994 | 1.019 |
| 475884 | nuclear pore complex protein Nup155 isoform 2 [Homo sapiens]         | 16 | 37  | al process; response to stimulus   | 1.026 | 0.994 | 0.939 |
| 609412 | Chain 5, Partial Rotational Order Disorder Structure Of Human Ste    | 2  | 7   |                                    | 0.944 | 0.994 | 1.056 |
| 418724 | FAD synthase isoform 2 [Homo sapiens]                                | 7  | 21  | metabolic process                  | 0.967 | 0.994 | 0.988 |
| 321299 | spliceosome associated protein 114 (SF3a) [Homo sapiens]             | 7  | 24  | d biogenesis; metabolic process    | 0.994 | 0.994 | 1.062 |
| 282078 | unnamed protein product, partial [Homo sapiens]                      | 2  | 6   | transport                          | 1.153 | 0.994 | 1.016 |
| 119609 | protein kinase, cAMP-dependent, regulatory, type I, alpha (tissue s  | 3  | 4   | ense response; cell proliferation  | 1.093 | 0.993 | 0.853 |
| 119622 | CD151 antigen (Raph blood group), isoform CRA_c, partial [Homo       | 4  | 12  | and biogenesis; cell proliferation | 1.143 | 0.993 | 1.044 |
| 578836 | PREDICTED: nuclear pore complex protein Nup50 isoform X2 [Hor        | 2  | 3   | al process; response to stimulus   | 0.945 | 0.993 | 0.727 |
| 189054 | unnamed protein product [Homo sapiens]                               | 2  | 5   | regulation of biological process   | 1.002 | 0.993 | 0.944 |
| 767904 | PREDICTED: agrin isoform X4 [Homo sapiens]                           | 14 | 33  | n; cellular component movement     | 0.932 | 0.993 | 0.932 |
| 202699 | HNF1-alpha dimerization cofactor [Homo sapiens]                      | 2  | 3   | cell organization and biogenesis   | 0.747 | 0.993 | 0.909 |
| 104335 | unnamed protein product [Homo sapiens]                               | 12 | 39  | metabolic process                  | 0.953 | 0.993 | 0.970 |
| 194384 | unnamed protein product [Homo sapiens]                               | 6  | 13  | l proliferation; defense response  | 0.969 | 0.993 | 0.910 |
| 827012 | platelet-activating factor acetylhydrolase IB subunit beta isoform e | 3  | 28  | ; regulation of biological process | 1.140 | 0.992 | 1.220 |
| 119609 | tripartite motif-containing 65, isoform CRA_d [Homo sapiens]         | 3  | 5   | regulation of biological process   | 0.786 | 0.992 | 1.046 |
| 128042 | Unknown (protein for IMAGE:3543711), partial [Homo sapiens]          | 17 | 120 | ; response to stimulus; transport  | 0.990 | 0.992 | 0.992 |
| 119614 | 3-hydroxyisobutyrate dehydrogenase, isoform CRA_b [Homo sapie        | 2  | 5   | metabolic process                  | 0.896 | 0.992 | 0.993 |
| 158259 | unnamed protein product [Homo sapiens]                               | 10 | 60  | s; coagulation; defense response   | 0.995 | 0.992 | 0.942 |
| 634743 | bromodomain-containing protein 2 isoform 4 [Homo sapiens]            | 3  | 9   | ; regulation of biological process | 0.993 | 0.992 | 0.964 |
| 723587 | Chain B, Crystal Structure Of N6-methyladenosine Rna Reader Yth      | 3  | 11  |                                    | 1.129 | 0.992 | 1.094 |
| 104387 | unnamed protein product [Homo sapiens]                               | 2  | 2   | unication; response to stimulus    | 0.897 | 0.991 | 0.982 |
| 221044 | unnamed protein product [Homo sapiens]                               | 12 | 50  | ; regulation of biological process | 1.156 | 0.991 | 0.993 |
| 203790 | small GTP binding protein RAB6C [Homo sapiens]                       | 9  | 101 | s; cellular component movement     | 1.130 | 0.991 | 0.982 |
| 119605 | solute carrier family 9 (sodium/hydrogen exchanger), member 3 re     | 3  | 16  | cell organization and biogenesis   | 0.777 | 0.990 | 0.905 |
| 609449 | amyloid precursor protein, partial [Homo sapiens]                    | 4  | 14  | response; cell growth; cell death  | 1.078 | 0.990 | 0.967 |
| 119576 | ATPase family, AAA domain containing 3A, isoform CRA_b [Homo         | 15 | 52  | ; regulation of biological process | 0.992 | 0.990 | 1.004 |
| 225903 | mannosyl-oligosaccharide glucosidase isoform 2 [Homo sapiens]        | 10 | 37  | metabolic process                  | 1.047 | 0.990 | 0.986 |



|        |                                                                       |    |     |                                     |       |       |       |
|--------|-----------------------------------------------------------------------|----|-----|-------------------------------------|-------|-------|-------|
| 578798 | PREDICTED: microtubule-actin cross-linking factor 1 isoform X27       | 2  | 5   | ic process; response to stimulus    | 1.216 | 0.990 | 1.069 |
| 300639 | unnamed protein product [Homo sapiens]                                | 7  | 35  |                                     | 0.939 | 0.990 | 1.216 |
| 639952 | unknown [Homo sapiens]                                                | 2  | 4   | metabolic process                   | 0.841 | 0.989 | 0.875 |
| 194374 | unnamed protein product [Homo sapiens]                                | 9  | 42  | ; regulation of biological process  | 1.056 | 0.989 | 0.934 |
| 545356 | brain-specific angiogenesis inhibitor 1-associated protein 2 isoform  | 6  | 24  | se to stimulus; defense response    | 0.933 | 0.989 | 0.850 |
| 158258 | unnamed protein product [Homo sapiens]                                | 15 | 57  | ic process; response to stimulus    | 1.139 | 0.989 | 0.975 |
| 119578 | tubulin, alpha 3, isoform CRA_c [Homo sapiens]                        | 17 | 450 | ogenesis; transport; cell division  | 1.180 | 0.988 | 1.030 |
| 119607 | v-yes-1 Yamaguchi sarcoma viral related oncogene homolog, isoform     | 4  | 11  | ommunication; defense response      | 1.178 | 0.988 | 1.104 |
| 126634 | unnamed protein product [Homo sapiens]                                | 2  | 3   |                                     | 0.908 | 0.988 | 1.063 |
| 578837 | PREDICTED: histone acetyltransferase p300 isoform X1 [Homo sapiens]   | 6  | 13  | a response; cellular homeostasis    | 1.149 | 0.988 | 1.115 |
| 119602 | diacylglycerol O-acyltransferase homolog 1 (mouse), isoform CRA_a     | 2  | 7   | cell organization and biogenesis    | 1.199 | 0.988 | 0.920 |
| 556697 | Chain A, The Crystal Structure And Mechanism Of Human Glutaryl        | 5  | 12  | metabolic process                   | 0.917 | 0.988 | 0.896 |
| 457515 | ERC1 protein, partial [Homo sapiens]                                  | 2  | 5   | process; development; transport     | 0.825 | 0.987 | 1.084 |
| 194381 | unnamed protein product [Homo sapiens]                                | 12 | 41  | cell organization and biogenesis    | 1.067 | 0.987 | 0.989 |
| 104339 | unnamed protein product [Homo sapiens]                                | 5  | 8   | ; metabolic process; cell division  | 0.953 | 0.987 | 0.836 |
| 808043 | Chain A, Crytsal Structure Of Human Pleiotropic Regulator 1 (prl1)    | 8  | 16  |                                     | 0.910 | 0.987 | 0.984 |
| 189069 | unnamed protein product [Homo sapiens]                                | 3  | 13  | o stimulus; cellular homeostasis    | 1.146 | 0.987 | 1.062 |
| 569720 | Unknown (protein for IMAGE:30389268), partial [Homo sapiens]          | 8  | 38  | metabolic process                   | 0.999 | 0.987 | 0.926 |
| 343293 | SFRS protein kinase 2 isoform c [Homo sapiens]                        | 3  | 8   | se to stimulus; defense response    | 1.027 | 0.986 | 1.046 |
| 119586 | defender against cell death 1, isoform CRA_a [Homo sapiens]           | 3  | 32  | ; regulation of biological process  | 1.310 | 0.986 | 1.030 |
| 194375 | unnamed protein product [Homo sapiens]                                | 4  | 13  | ic process; response to stimulus    | 0.904 | 0.986 | 1.122 |
| 702358 | unnamed protein product [Homo sapiens]                                | 2  | 3   |                                     | 1.571 | 0.986 | 1.000 |
| 862669 | negative elongation factor B [Homo sapiens]                           | 4  | 11  | ; regulation of biological process  | 1.200 | 0.985 | 1.070 |
| 194383 | unnamed protein product [Homo sapiens]                                | 4  | 10  | sponse to stimulus; cell division   | 1.167 | 0.985 | 0.945 |
| 158257 | unnamed protein product [Homo sapiens]                                | 2  | 3   | cess; cell proliferation; transport | 0.951 | 0.985 | 0.865 |
| 482696 | glutamine--tRNA ligase isoform a [Homo sapiens]                       | 27 | 141 | metabolic process                   | 1.024 | 0.985 | 0.969 |
| 816045 | Chain D, Crystal Structure Of Human Trap1 With Ampnp                  | 16 | 368 |                                     | 1.178 | 0.985 | 1.061 |
| 530400 | PREDICTED: heterogeneous nuclear ribonucleoprotein A1 isoform         | 12 | 137 | lic process; transport; cell death  | 1.107 | 0.985 | 1.184 |
| 158256 | unnamed protein product [Homo sapiens]                                | 19 | 74  | n; defense response; cell growth    | 0.973 | 0.985 | 0.939 |
| 530404 | PREDICTED: serine/threonine-protein kinase MRCK beta isoform X1       | 8  | 12  | s; cellular component movement      | 0.963 | 0.985 | 0.906 |
| 631854 | retinal short-chain dehydrogenase/reductase retSDR4 [Homo sapiens]    | 7  | 22  | metabolic process                   | 0.852 | 0.984 | 0.981 |
| 170640 | p25 [Homo sapiens]                                                    | 5  | 35  | ; regulation of biological process  | 0.987 | 0.984 | 0.986 |
| 119573 | misato homolog 1 (Drosophila), isoform CRA_a [Homo sapiens]           | 2  | 6   | d biogenesis; metabolic process     | 0.748 | 0.984 | 0.893 |
| 119603 | hCG1782167, isoform CRA_a [Homo sapiens]                              | 18 | 51  |                                     | 0.984 | 0.984 | 0.987 |
| 620878 | heat shock 70kDa protein 4 isoform a variant, partial [Homo sapiens]  | 24 | 151 | ; response to stimulus; transport   | 1.186 | 0.984 | 1.024 |
| 410271 | EH-binding protein, partial [Homo sapiens]                            | 2  | 5   | al process; response to stimulus    | 0.961 | 0.984 | 0.876 |
| 158255 | unnamed protein product [Homo sapiens]                                | 15 | 48  | cell organization and biogenesis    | 1.072 | 0.984 | 0.952 |
| 530418 | PREDICTED: regulation of nuclear pre-mRNA domain-containing p         | 4  | 15  | ; regulation of biological process  | 1.337 | 0.984 | 1.021 |
| 119577 | platelet-activating factor acetylhydrolase, isoform lb, gamma subunit | 6  | 28  | metabolic process                   | 0.913 | 0.984 | 0.988 |
| 932785 | Chain B, Irf3-Cbp Complex                                             | 5  | 10  | regulation of biological process    | 0.904 | 0.984 | 0.952 |

|        |                                                                     |    |     |                                    |       |       |       |
|--------|---------------------------------------------------------------------|----|-----|------------------------------------|-------|-------|-------|
| 119625 | ubiquitin-activating enzyme E1-like 2, isoform CRA_a [Homo sapiens] | 7  | 17  | ic process; response to stimulus   | 1.112 | 0.984 | 0.995 |
| 189053 | unnamed protein product [Homo sapiens]                              | 4  | 9   | cell organization and biogenesis   | 1.118 | 0.984 | 0.870 |
| 340545 | mysterin [Homo sapiens]                                             | 14 | 28  | metabolic process                  | 0.916 | 0.984 | 0.992 |
| 119598 | ATPase, Class VI, type 11B, isoform CRA_d [Homo sapiens]            | 2  | 2   | cell organization and biogenesis   | 0.781 | 0.983 | 0.935 |
| 330689 | Chain A, Refinement Of Rna Binding Domain In Human Tra2 Beta P      | 3  | 34  |                                    | 1.023 | 0.983 | 0.914 |
| 119577 | spectrin, beta, non-erythrocytic 4, isoform CRA_c [Homo sapiens]    | 2  | 13  | ent; transport; defense response   | 0.945 | 0.983 | 1.056 |
| 157738 | E3 ubiquitin-protein ligase HECTD3 [Homo sapiens]                   | 3  | 6   | metabolic process                  | 0.840 | 0.983 | 0.934 |
| 119594 | hCG2020143, isoform CRA_a [Homo sapiens]                            | 4  | 12  | d biogenesis; cell differentiation | 0.978 | 0.983 | 0.816 |
| 158161 | oligosaccharyltransferase                                           | 9  | 60  | metabolic process                  | 1.076 | 0.982 | 1.021 |
| 119575 | similar to RIKEN cDNA 4732495G21 gene [Homo sapiens]                | 4  | 302 |                                    | 1.056 | 0.982 | 0.992 |
| 414727 | unknown [Homo sapiens]                                              | 3  | 18  | metabolic process                  | 0.964 | 0.982 | 0.977 |
| 804785 | STRBP protein, partial [Homo sapiens]                               | 8  | 14  | velopment; response to stimulus    | 0.813 | 0.982 | 1.004 |
| 273625 | aflatoxin aldehyde reductase AFAR [Homo sapiens]                    | 8  | 44  | metabolic process                  | 1.079 | 0.982 | 0.922 |
| 347828 | NIBP protein [Homo sapiens]                                         | 5  | 6   | cell organization and biogenesis   | 0.936 | 0.982 | 1.022 |
| 530427 | PREDICTED: WD repeat-containing protein 5 isoform X1 [Homo sa       | 8  | 16  | ; regulation of biological process | 1.030 | 0.982 | 1.076 |
| 194391 | unnamed protein product [Homo sapiens]                              | 4  | 8   | al process; response to stimulus   | 0.877 | 0.981 | 1.052 |
| 471252 | CRYZ protein [Homo sapiens]                                         | 4  | 12  | cell organization and biogenesis   | 0.892 | 0.981 | 1.014 |
| 119616 | G elongation factor, mitochondrial 2, isoform CRA_c [Homo sapien    | 2  | 3   | cell organization and biogenesis   | 1.044 | 0.981 | 0.856 |
| 298839 | Unknown gene product [Homo sapiens]                                 | 5  | 30  |                                    | 1.044 | 0.981 | 0.965 |
| 525457 | hypothetical protein, partial [Homo sapiens]                        | 2  | 4   |                                    | 1.044 | 0.981 | 1.066 |
| 657328 | beta tropomyosin, partial [Homo sapiens]                            | 7  | 59  | ; regulation of biological process | 1.293 | 0.981 | 1.078 |
| 119612 | WD repeats and SOF1 domain containing, isoform CRA_a [Homo s        | 4  | 9   | metabolic process                  | 1.128 | 0.980 | 1.020 |
| 119574 | hCG2024613, isoform CRA_c [Homo sapiens]                            | 3  | 7   | cell organization and biogenesis   | 1.000 | 0.980 | 0.882 |
| 158261 | unnamed protein product [Homo sapiens]                              | 4  | 7   | ; transport; response to stimulus  | 0.968 | 0.980 | 0.885 |
| 227968 | Chain A, The Mad2 Spindle Checkpoint Protein Undergoes Similar      | 3  | 10  |                                    | 1.031 | 0.980 | 1.017 |
| 119596 | ADP-ribosylation factor guanine nucleotide-exchange factor 2 (bre   | 5  | 10  | al process; response to stimulus   | 0.997 | 0.980 | 0.986 |
| 767989 | PREDICTED: L-fucose kinase isoform X6 [Homo sapiens]                | 2  | 5   | metabolic process                  | 0.972 | 0.979 | 0.752 |
| 119569 | hCG40944, isoform CRA_a [Homo sapiens]                              | 3  | 6   |                                    | 0.868 | 0.979 | 0.958 |
| 192987 | Chain B, Crystal Structure Of The Protein-disulfide Isomerase Rela  | 3  | 6   | transport                          | 0.999 | 0.979 | 1.056 |
| 194382 | unnamed protein product [Homo sapiens]                              | 7  | 14  | ic process; response to stimulus   | 0.920 | 0.979 | 0.963 |
| 196841 | NCLN protein [Homo sapiens]                                         | 14 | 63  | ; regulation of biological process | 1.011 | 0.979 | 0.948 |
| 193786 | unnamed protein product [Homo sapiens]                              | 20 | 144 | ent movement; defense response     | 1.042 | 0.978 | 0.973 |
| 119609 | ubiquitin-conjugating enzyme E2O, isoform CRA_d [Homo sapiens]      | 5  | 9   | n of biological process; transport | 0.863 | 0.978 | 1.012 |
| 203790 | small GTP binding protein RAB6A [Homo sapiens]                      | 9  | 100 | s; cellular component movement     | 1.114 | 0.978 | 0.971 |
| 780705 | UBE2Q1 protein, partial [Homo sapiens]                              | 3  | 5   | us; metabolic process; transport   | 0.897 | 0.977 | 1.108 |
| 116283 | UBTF protein, partial [Homo sapiens]                                | 3  | 5   | d biogenesis; metabolic process    | 0.764 | 0.977 | 1.205 |
| 119631 | hCG1811743, isoform CRA_f [Homo sapiens]                            | 5  | 18  |                                    | 0.889 | 0.977 | 0.932 |
| 767966 | PREDICTED: mitochondrial glutamate carrier 1 isoform X1 [Homo       | 8  | 38  | transport                          | 1.067 | 0.977 | 1.014 |
| 157972 | unnamed protein product, partial [Homo sapiens]                     | 4  | 6   |                                    | 0.858 | 0.977 | 0.994 |
| 119580 | activating signal cointegrator 1 complex subunit 2, isoform CRA_a   | 2  | 5   | ; regulation of biological process | 1.119 | 0.977 | 0.988 |

|        |                                                                           |    |     |                                       |       |       |       |
|--------|---------------------------------------------------------------------------|----|-----|---------------------------------------|-------|-------|-------|
| 119591 | centaurin, gamma 2, isoform CRA_b [Homo sapiens]                          | 4  | 7   | ; response to stimulus; transport     | 0.913 | 0.977 | 1.027 |
| 628976 | mitochondrial ribosomal protein L24 variant, partial [Homo sapiens]       | 3  | 9   | cell organization and biogenesis      | 0.889 | 0.977 | 0.976 |
| 119601 | exocyst complex component 5, isoform CRA_a [Homo sapiens]                 | 3  | 4   | d biogenesis; metabolic process       | 0.990 | 0.976 | 1.095 |
| 733606 | tubulin alpha-1C chain isoform b [Homo sapiens]                           | 17 | 419 | tion and biogenesis; cell division    | 1.224 | 0.976 | 1.044 |
| 189055 | unnamed protein product [Homo sapiens]                                    | 8  | 33  | cell organization and biogenesis      | 1.199 | 0.976 | 0.959 |
| 194386 | unnamed protein product [Homo sapiens]                                    | 5  | 29  | ent movement; defense response        | 0.919 | 0.976 | 0.936 |
| 194391 | unnamed protein product [Homo sapiens]                                    | 3  | 10  | s; cellular component movement        | 0.857 | 0.976 | 0.885 |
| 119621 | tyrosine 3-monooxygenase/tryptophan 5-monooxygenase activator             | 11 | 145 | cell organization and biogenesis      | 1.029 | 0.976 | 1.004 |
| 530376 | PREDICTED: 60S ribosomal protein L9 isoform X1 [Homo sapiens]             | 6  | 34  | ization and biogenesis; transport     | 0.984 | 0.976 | 0.950 |
| 530379 | PREDICTED: eukaryotic peptide chain release factor subunit 1 isoform X1   | 4  | 11  | ; regulation of biological process    | 0.978 | 0.975 | 0.858 |
| 525457 | hypothetical protein, partial [Homo sapiens]                              | 7  | 27  | ; response to stimulus; transport     | 1.098 | 0.975 | 0.971 |
| 193785 | unnamed protein product [Homo sapiens]                                    | 24 | 182 | ization and biogenesis; transport     | 1.019 | 0.975 | 0.928 |
| 119571 | RAD17 homolog (S. pombe), isoform CRA_g [Homo sapiens]                    | 2  | 3   | ; regulation of biological process    | 0.813 | 0.975 | 1.042 |
| 158259 | unnamed protein product [Homo sapiens]                                    | 9  | 57  | metabolic process                     | 1.218 | 0.975 | 0.956 |
| 559581 | surfeit 1, partial [Homo sapiens]                                         | 2  | 2   | ization and biogenesis; transport     | 0.906 | 0.975 | 0.943 |
| 824074 | Chain A, Crystal Structure Of Vps4b                                       | 2  | 9   | metabolic process                     | 0.946 | 0.975 | 0.995 |
| 119626 | SEC24 related gene family, member B (S. cerevisiae) [Homo sapiens]        | 8  | 32  | ; regulation of biological process    | 1.033 | 0.975 | 0.956 |
| 194379 | unnamed protein product [Homo sapiens]                                    | 4  | 7   | l proliferation; cell differentiation | 1.047 | 0.975 | 0.910 |
| 430988 | similar to Schizosaccharomyces pombe splicing factor; similar to          | 3  | 17  | metabolic process                     | 0.992 | 0.974 | 1.003 |
| 119573 | protoporphyrinogen oxidase, isoform CRA_b [Homo sapiens]                  | 12 | 51  | ic process; response to stimulus      | 0.959 | 0.974 | 0.953 |
| 189069 | unnamed protein product [Homo sapiens]                                    | 3  | 6   | metabolic process                     | 1.061 | 0.974 | 1.046 |
| 628221 | unknown [Homo sapiens]                                                    | 8  | 33  | metabolic process                     | 1.103 | 0.974 | 0.958 |
| 530413 | PREDICTED: COP9 signalosome complex subunit 1 isoform X18 [Homo sapiens]  | 11 | 44  | ic process; response to stimulus      | 1.018 | 0.972 | 0.944 |
| 767981 | PREDICTED: alpha-actinin-1 isoform X7 [Homo sapiens]                      | 19 | 178 | ; regulation of biological process    | 1.084 | 0.972 | 1.018 |
| 182395 | focal adhesion kinase [Homo sapiens]                                      | 2  | 3   | ; regulation of biological process    | 1.236 | 0.972 | 1.112 |
| 545746 | E3 ubiquitin-protein ligase TRIP12 isoform d [Homo sapiens]               | 7  | 14  | ; regulation of biological process    | 0.957 | 0.972 | 0.887 |
| 182627 | mediator complex subunit MED23 variant MED23_i8 [Homo sapiens]            | 2  | 5   | gical process; metabolic process      | 0.992 | 0.972 | 0.793 |
| 746816 | tubulin beta-6 chain isoform 6 [Homo sapiens]                             | 8  | 220 | cell organization and biogenesis      | 0.988 | 0.971 | 0.860 |
| 110624 | band 4.1-like protein 4B isoform 1 [Homo sapiens]                         | 2  | 4   | biogenesis; response to stimulus      | 0.795 | 0.971 | 0.934 |
| 119588 | hCG2032701, isoform CRA_a [Homo sapiens]                                  | 15 | 81  | metabolic process                     | 1.194 | 0.971 | 1.013 |
| 119617 | achalasia, adrenocortical insufficiency, alacrimia (Allgrove, triple-A)   | 6  | 16  | ; regulation of biological process    | 0.918 | 0.971 | 0.920 |
| 767908 | PREDICTED: digestive organ expansion factor homolog isoform X1            | 2  | 4   | metabolic process; development        | 0.871 | 0.971 | 1.008 |
| 328845 | transcription elongation factor TFIIS.h, partial (plasmid) [Homo sapiens] | 2  | 6   | ; regulation of biological process    | 0.995 | 0.970 | 0.883 |
| 119611 | cell division cycle 73, Paf1/RNA polymerase II complex component          | 9  | 24  | biogenesis; response to stimulus      | 0.853 | 0.970 | 0.936 |
| 118142 | RSL1D1 protein, partial [Homo sapiens]                                    | 3  | 3   | ; regulation of biological process    | 1.014 | 0.969 | 1.053 |
| 578800 | PREDICTED: metaxin-1 isoform X1 [Homo sapiens]                            | 2  | 10  | transport; metabolic process          | 0.909 | 0.969 | 0.956 |
| 281604 | serine/threonine-protein phosphatase PGAM5, mitochondrial isoform X1      | 7  | 44  | response to stimulus; cell death      | 0.960 | 0.969 | 0.945 |
| 530398 | PREDICTED: DCN1-like protein 5 isoform X2 [Homo sapiens]                  | 3  | 7   | ; regulation of biological process    | 0.726 | 0.969 | 0.975 |
| 119598 | eukaryotic translation initiation factor 2B, subunit 5 epsilon, 82kDa     | 3  | 8   | gical process; cell differentiation   | 1.058 | 0.969 | 0.960 |
| 119624 | methylmalonyl Coenzyme A mutase, isoform CRA_b [Homo sapiens]             | 3  | 9   | metabolic process                     | 0.728 | 0.969 | 0.911 |

|        |                                                                     |    |     |                                    |       |       |       |
|--------|---------------------------------------------------------------------|----|-----|------------------------------------|-------|-------|-------|
| 119629 | phosphofructokinase, liver, isoform CRA_b [Homo sapiens]            | 21 | 129 | cell organization and biogenesis   | 1.054 | 0.968 | 0.943 |
| 281752 | General transcription factor IIIc, polypeptide 3, 102kDa [Homo sap  | 6  | 10  | metabolic process                  | 1.027 | 0.968 | 0.928 |
| 578831 | PREDICTED: transmembrane protein 104 isoform X1 [Homo sapien        | 2  | 3   |                                    | 0.954 | 0.968 | 1.058 |
| 119618 | hCG2016250, isoform CRA_d [Homo sapiens]                            | 11 | 71  | metabolic process                  | 0.985 | 0.967 | 0.990 |
| 262118 | Chain H, Mutation Of Thr163 To Ser In Human Thymidine Kinase S      | 4  | 13  |                                    | 0.915 | 0.967 | 0.899 |
| 119607 | RAB14, member RAS oncogene family, isoform CRA_a [Homo sap          | 10 | 101 | cell organization and biogenesis   | 1.012 | 0.967 | 0.977 |
| 189053 | unnamed protein product [Homo sapiens]                              | 3  | 19  | ization and biogenesis; transport  | 0.913 | 0.967 | 0.998 |
| 338700 | tat binding protein-1 (tbp-1) [Homo sapiens]                        | 5  | 24  | ent movement; defense response     | 0.985 | 0.967 | 0.965 |
| 395759 | Chain A, Crystal Structure Of Kap Beta2-Py-Nls                      | 7  | 34  | transport                          | 0.984 | 0.967 | 0.969 |
| 194384 | unnamed protein product [Homo sapiens]                              | 6  | 9   | cell organization and biogenesis   | 1.046 | 0.967 | 1.058 |
| 460417 | actin-related protein 3 isoform 2 [Homo sapiens]                    | 5  | 16  | ; cell division; defense response  | 1.111 | 0.966 | 0.958 |
| 138102 | phosphoribospyrophosphate synthetase-associated protein 39 [H       | 5  | 14  | ; regulation of biological process | 1.020 | 0.966 | 0.979 |
| 31092  | unnamed protein product [Homo sapiens]                              | 15 | 209 | al process; response to stimulus   | 0.979 | 0.966 | 0.954 |
| 154448 | exportin-7 [Homo sapiens]                                           | 25 | 95  | transport                          | 1.079 | 0.965 | 0.969 |
| 119629 | hCG401289, isoform CRA_a [Homo sapiens]                             | 7  | 37  | abolic process; cell proliferation | 0.981 | 0.965 | 0.948 |
| 194377 | unnamed protein product [Homo sapiens]                              | 7  | 33  | metabolic process                  | 1.096 | 0.965 | 0.938 |
| 158259 | unnamed protein product [Homo sapiens]                              | 10 | 38  | transport; metabolic process       | 1.123 | 0.965 | 1.030 |
| 530366 | PREDICTED: cleavage and polyadenylation specificity factor subu     | 7  | 19  | metabolic process; transport       | 0.985 | 0.965 | 0.956 |
| 929654 | KIAA1838 protein [Homo sapiens]                                     | 2  | 6   |                                    | 0.881 | 0.965 | 0.983 |
| 344189 | Chain A, Crystal Structure Analysis Of H74a Mutant Of Human Clic    | 7  | 59  |                                    | 1.000 | 0.965 | 0.998 |
| 746817 | 60S ribosomal protein L10 isoform c [Homo sapiens]                  | 5  | 48  | sis; metabolic process; transport  | 0.949 | 0.965 | 0.910 |
| 768039 | PREDICTED: cullin-4B isoform X5 [Homo sapiens]                      | 16 | 53  | ; regulation of biological process | 0.969 | 0.965 | 0.988 |
| 482570 | TALDO1 protein, partial [Homo sapiens]                              | 16 | 105 | metabolic process                  | 1.190 | 0.965 | 0.929 |
| 194382 | unnamed protein product [Homo sapiens]                              | 7  | 17  | ic process; response to stimulus   | 1.024 | 0.964 | 0.913 |
| 119622 | calcium and integrin binding 1 (calmyrin), isoform CRA_a, partial [ | 2  | 3   | ion and biogenesis; cell division  | 0.762 | 0.964 | 0.855 |
| 194388 | unnamed protein product [Homo sapiens]                              | 3  | 5   | nponent movement; cell division    | 1.321 | 0.964 | 1.078 |
| 194378 | unnamed protein product [Homo sapiens]                              | 9  | 47  | metabolic process                  | 1.118 | 0.964 | 1.114 |
| 459463 | IARS2 protein, partial [Homo sapiens]                               | 11 | 49  | cell organization and biogenesis   | 1.038 | 0.963 | 0.979 |
| 119603 | glutamic-oxaloacetic transaminase 2, mitochondrial (aspartate am    | 12 | 74  | ; transport; response to stimulus  | 0.993 | 0.963 | 0.904 |
| 223460 | SYNJ1 protein [Homo sapiens]                                        | 2  | 2   | ; regulation of biological process | 0.959 | 0.963 | 1.013 |
| 119621 | desmoglein 1 [Homo sapiens]                                         | 2  | 2   | ; regulation of biological process | 0.951 | 0.963 | 1.300 |
| 767985 | PREDICTED: kunitz-type protease inhibitor 1 isoform X2 [Homo sa     | 2  | 6   | cell organization and biogenesis   | 0.882 | 0.963 | 1.041 |
| 767980 | PREDICTED: endoribonuclease Dicer isoform X3 [Homo sapiens]         | 2  | 3   | ense response; cell proliferation  | 0.953 | 0.963 | 0.889 |
| 159298 | QTRT1 protein [Homo sapiens]                                        | 3  | 5   | metabolic process                  | 1.057 | 0.963 | 0.855 |
| 543044 | unnamed protein product, partial [Homo sapiens]                     | 2  | 2   |                                    | 1.093 | 0.963 | 0.846 |
| 445452 | similar to insulin receptor substrate BAP2; similar to PID:g412647  | 5  | 13  | al process; response to stimulus   | 0.852 | 0.963 | 0.907 |
| 193788 | unnamed protein product [Homo sapiens]                              | 18 | 138 | ic process; response to stimulus   | 0.964 | 0.962 | 0.954 |
| 119574 | hCG2024613, isoform CRA_a [Homo sapiens]                            | 3  | 14  | al process; response to stimulus   | 0.949 | 0.962 | 0.942 |
| 158430 | Chain A, Crystal Structure Of Human Rac3 In Complex With Crib D     | 4  | 29  | al process; response to stimulus   | 0.936 | 0.962 | 0.999 |
| 530393 | PREDICTED: hexokinase-1 isoform X6 [Homo sapiens]                   | 22 | 120 | sis; metabolic process; transport  | 1.052 | 0.962 | 1.022 |



|        |                                                                                                  |    |     |                                                   |       |       |       |
|--------|--------------------------------------------------------------------------------------------------|----|-----|---------------------------------------------------|-------|-------|-------|
| 667484 | Chain O, Crystal Structure Of The Cop9 Signalosome                                               | 3  | 12  |                                                   | 1.297 | 0.962 | 1.051 |
| 403530 | CSG1cA-T protein [Homo sapiens]                                                                  | 3  | 4   | metabolic process                                 | 0.950 | 0.961 | 0.903 |
| 400352 | unnamed protein product [Homo sapiens]                                                           | 5  | 13  |                                                   | 0.967 | 0.961 | 0.919 |
| 119628 | hCG1984214, isoform CRA_a [Homo sapiens]                                                         | 2  | 8   | cell organization and biogenesis                  | 0.996 | 0.961 | 0.917 |
| 259155 | mitochondrial 2-oxoglutarate/malate carrier protein isoform 2 [Homo sapiens]                     | 13 | 63  | metabolic process; transport                      | 1.026 | 0.961 | 0.939 |
| 559098 | stomatin-like protein 2, mitochondrial isoform b [Homo sapiens]                                  | 5  | 40  | cellular process; response to stimulus            | 1.066 | 0.961 | 0.974 |
| 450622 | 26S proteasome non-ATPase regulatory subunit 12 isoform 1 [Homo sapiens]                         | 9  | 30  | cellular movement; defense response               | 0.963 | 0.961 | 0.914 |
| 605524 | SSRP1 protein, partial [Homo sapiens]                                                            | 8  | 58  | regulation of biological process                  | 1.176 | 0.960 | 1.014 |
| 119578 | cat eye syndrome chromosome region, candidate 5, isoform CRA_a [Homo sapiens]                    | 3  | 11  | metabolic process                                 | 1.174 | 0.960 | 0.977 |
| 189053 | unnamed protein product [Homo sapiens]                                                           | 9  | 58  | cellular movement; defense response               | 1.116 | 0.960 | 0.997 |
| 194386 | unnamed protein product [Homo sapiens]                                                           | 17 | 88  | cellular biogenesis; cellular homeostasis         | 1.031 | 0.960 | 1.013 |
| 119613 | WD repeat domain 1, isoform CRA_a [Homo sapiens]                                                 | 15 | 75  | regulation of biological process                  | 1.052 | 0.960 | 0.929 |
| 476784 | dJ508I15.5 [Homo sapiens]                                                                        | 2  | 16  | cell organization and biogenesis                  | 1.372 | 0.960 | 0.914 |
| 344179 | neuroblastoma-amplified sequence, partial [Homo sapiens]                                         | 2  | 4   | regulation of biological process                  | 0.998 | 0.959 | 0.827 |
| 193787 | unnamed protein product [Homo sapiens]                                                           | 13 | 71  | cellular transport; response to stimulus          | 1.218 | 0.959 | 0.983 |
| 119619 | eukaryotic translation initiation factor 2, subunit 3 gamma, 52kDa, isoform CRA_a [Homo sapiens] | 11 | 45  | cellular biogenesis; metabolic process; transport | 1.013 | 0.959 | 0.902 |
| 262469 | Chain B, Human Mitochondrial Single-Stranded Dna Binding Protein [Homo sapiens]                  | 5  | 38  |                                                   | 1.218 | 0.959 | 0.987 |
| 119602 | tetracycline transporter-like protein, isoform CRA_a [Homo sapiens]                              | 6  | 25  | transport; cell death                             | 0.890 | 0.959 | 1.016 |
| 767925 | PREDICTED: disks large homolog 1 isoform X10 [Homo sapiens]                                      | 4  | 10  | cellular movement; cellular component movement    | 0.977 | 0.959 | 0.978 |
| 767923 | PREDICTED: protein SEC13 homolog isoform X5 [Homo sapiens]                                       | 4  | 40  | cell organization and biogenesis                  | 1.081 | 0.959 | 0.960 |
| 119595 | slingshot homolog 3 (Drosophila), isoform CRA_f [Homo sapiens]                                   | 8  | 22  | regulation of biological process                  | 1.104 | 0.959 | 0.881 |
| 913174 | TRPP, partial [Homo sapiens]                                                                     | 7  | 69  | regulation of biological process                  | 0.863 | 0.958 | 0.966 |
| 514764 | hypothetical protein [Homo sapiens]                                                              | 6  | 15  | cellular process; response to stimulus            | 0.891 | 0.958 | 1.003 |
| 119577 | WD repeat domain 3, isoform CRA_a [Homo sapiens]                                                 | 8  | 21  | metabolic process                                 | 1.069 | 0.958 | 0.945 |
| 530385 | PREDICTED: beta-glucuronidase isoform X1 [Homo sapiens]                                          | 7  | 21  | metabolic process                                 | 1.094 | 0.957 | 1.033 |
| 767997 | PREDICTED: structural maintenance of chromosomes flexible hinge domain 1 [Homo sapiens]          | 11 | 31  | regulation of biological process                  | 0.910 | 0.957 | 0.952 |
| 119594 | OTU domain, ubiquitin aldehyde binding 1, isoform CRA_c [Homo sapiens]                           | 6  | 39  | response to stimulus; defense response            | 1.209 | 0.956 | 0.972 |
| 334273 | NUKM_HUMAN, partial CDS, partial [Homo sapiens]                                                  | 4  | 12  | cell organization and biogenesis                  | 1.254 | 0.956 | 0.984 |
| 158259 | unnamed protein product [Homo sapiens]                                                           | 4  | 25  | transport                                         | 0.962 | 0.956 | 0.976 |
| 119615 | KIAA0090, isoform CRA_b [Homo sapiens]                                                           | 14 | 47  | metabolic process                                 | 1.073 | 0.956 | 0.942 |
| 119591 | ATG4 autophagy related 4 homolog B (S. cerevisiae), isoform CRA_a [Homo sapiens]                 | 2  | 4   | regulation of biological process                  | 0.927 | 0.956 | 0.939 |
| 120528 | hypothetical protein [Homo sapiens]                                                              | 9  | 102 | cellular biogenesis; cell differentiation         | 1.203 | 0.955 | 1.046 |
| 119603 | component of oligomeric golgi complex 5, isoform CRA_a [Homo sapiens]                            | 11 | 32  | transport                                         | 0.912 | 0.955 | 0.904 |
| 234318 | tubulin folding cofactor B [Homo sapiens]                                                        | 7  | 51  | cellular differentiation; metabolic process       | 1.145 | 0.955 | 0.920 |
| 482571 | RIC8A protein, partial [Homo sapiens]                                                            | 6  | 20  | cell organization and biogenesis                  | 1.065 | 0.955 | 0.961 |
| 119596 | acyl-CoA synthetase short-chain family member 2, isoform CRA_c [Homo sapiens]                    | 8  | 13  | metabolic process                                 | 0.913 | 0.955 | 0.854 |
| 119569 | antigen identified by monoclonal antibody Ki-67, isoform CRA_c [Homo sapiens]                    | 2  | 3   | cellular proliferation; response to stimulus      | 0.864 | 0.955 | 0.915 |
| 119584 | transmembrane protein 43, isoform CRA_b, partial [Homo sapiens]                                  | 5  | 19  | cell organization and biogenesis                  | 1.074 | 0.954 | 0.944 |
| 702031 | unnamed protein product [Homo sapiens]                                                           | 3  | 7   | cellular process; transport; cell differentiation | 0.944 | 0.954 | 0.923 |
| 157534 | HU-K4 [Homo sapiens]                                                                             | 3  | 4   | metabolic process                                 | 1.032 | 0.954 | 1.094 |

|        |                                                                                                    |    |     |                                    |       |       |       |
|--------|----------------------------------------------------------------------------------------------------|----|-----|------------------------------------|-------|-------|-------|
| 100236 | coatamer protein [Homo sapiens]                                                                    | 40 | 217 | cell organization and biogenesis   | 1.069 | 0.954 | 0.915 |
| 510785 | integrin-linked protein kinase isoform 2 [Homo sapiens]                                            | 4  | 4   | cell organization and biogenesis   | 0.863 | 0.953 | 0.930 |
| 938148 | DNA-directed RNA polymerases I, II, and III subunit RPABC1 isoform 1 [Homo sapiens]                | 4  | 13  |                                    | 0.877 | 0.952 | 0.939 |
| 189065 | unnamed protein product [Homo sapiens]                                                             | 3  | 10  | ic process; response to stimulus   | 0.900 | 0.952 | 0.913 |
| 113639 | KIAA0169 protein, partial [Homo sapiens]                                                           | 8  | 13  | al process; response to stimulus   | 0.957 | 0.952 | 0.955 |
| 520728 | Chain B, Crystal Structure Of Recombinant Human Hexokinase Type I [Homo sapiens]                   | 22 | 118 |                                    | 1.092 | 0.952 | 1.017 |
| 887492 | Chain a, Structure Of The Hcv Ires Bound To The Human Ribosome [Homo sapiens]                      | 2  | 28  |                                    | 1.259 | 0.951 | 0.969 |
| 194390 | unnamed protein product [Homo sapiens]                                                             | 4  | 7   | tion and biogenesis; cell division | 1.051 | 0.951 | 1.122 |
| 221042 | unnamed protein product [Homo sapiens]                                                             | 2  | 28  | ; regulation of biological process | 1.613 | 0.951 | 0.984 |
| 133777 | RPS4Y1 protein, partial [Homo sapiens]                                                             | 11 | 77  | genesis; transport; development    | 1.015 | 0.951 | 0.942 |
| 119617 | RAB21, member RAS oncogene family, isoform CRA_a [Homo sapiens]                                    | 4  | 14  | s; cellular component movement     | 1.058 | 0.951 | 0.910 |
| 193787 | unnamed protein product [Homo sapiens]                                                             | 2  | 3   | metabolic process                  | 0.693 | 0.950 | 1.013 |
| 194390 | unnamed protein product [Homo sapiens]                                                             | 15 | 59  | cell organization and biogenesis   | 1.080 | 0.950 | 0.886 |
| 767977 | PREDICTED: mitochondrial intermediate peptidase isoform X1 [Homo sapiens]                          | 7  | 14  | metabolic process                  | 0.938 | 0.950 | 0.927 |
| 338783 | Isochorismatase domain containing 1 [Homo sapiens]                                                 | 3  | 9   | metabolic process                  | 1.201 | 0.950 | 0.975 |
| 119627 | tyrosyl-tRNA synthetase, isoform CRA_a [Homo sapiens]                                              | 10 | 29  | al process; response to stimulus   | 1.094 | 0.950 | 1.098 |
| 217501 | unnamed protein product [Homo sapiens]                                                             | 16 | 184 | al process; response to stimulus   | 1.004 | 0.950 | 0.984 |
| 194380 | unnamed protein product [Homo sapiens]                                                             | 18 | 70  | cell organization and biogenesis   | 1.113 | 0.950 | 1.028 |
| 400429 | unnamed protein product, partial [Homo sapiens]                                                    | 2  | 8   |                                    | 1.513 | 0.950 | 1.058 |
| 189065 | unnamed protein product [Homo sapiens]                                                             | 5  | 59  | ; regulation of biological process | 1.214 | 0.949 | 0.945 |
| 119584 | mitochondrial ribosomal protein S25, isoform CRA_a [Homo sapiens]                                  | 2  | 3   | d biogenesis; metabolic process    | 1.011 | 0.949 | 1.004 |
| 119605 | hCG2040050, isoform CRA_a [Homo sapiens]                                                           | 2  | 4   | al process; response to stimulus   | 0.815 | 0.949 | 0.948 |
| 119592 | exosome component 10, isoform CRA_c [Homo sapiens]                                                 | 4  | 5   | ; regulation of biological process | 0.768 | 0.949 | 0.981 |
| 119574 | hCG2002711, isoform CRA_b [Homo sapiens]                                                           | 6  | 21  | metabolic process                  | 0.958 | 0.948 | 0.996 |
| 545383 | Sjogren syndrome/scleroderma autoantigen 1 isoform 1 [Homo sapiens]                                | 2  | 5   | tion and biogenesis; cell division | 1.136 | 0.948 | 0.931 |
| 119571 | phosphatidylinositol glycan, class S, isoform CRA_a [Homo sapiens]                                 | 7  | 30  | metabolic process                  | 0.826 | 0.948 | 0.932 |
| 131830 | steroid dehydrogenase-like protein [Homo sapiens]                                                  | 4  | 13  | metabolic process                  | 1.065 | 0.948 | 0.934 |
| 300193 | Chain B, The Structure Of Human Prolylcarboxypeptidase At 2.80 Angstroms Resolution [Homo sapiens] | 3  | 6   | metabolic process                  | 0.998 | 0.947 | 0.791 |
| 193785 | unnamed protein product [Homo sapiens]                                                             | 18 | 62  | ifferentiation; metabolic process  | 0.917 | 0.947 | 0.940 |
| 563008 | lysyl hydroxylase 3 [Homo sapiens]                                                                 | 10 | 28  | ic process; response to stimulus   | 0.943 | 0.946 | 0.910 |
| 119611 | uridine-cytidine kinase 2, isoform CRA_b [Homo sapiens]                                            | 2  | 2   | metabolic process                  | 0.992 | 0.946 | 0.896 |
| 189310 | truncated E-cadherin [Homo sapiens]                                                                | 6  | 13  | e to stimulus; metabolic process   | 1.035 | 0.946 | 1.115 |
| 119631 | DnaJ (Hsp40) homolog, subfamily C, member 10, isoform CRA_d [Homo sapiens]                         | 2  | 3   | o stimulus; cellular homeostasis   | 0.680 | 0.946 | 0.796 |
| 767993 | PREDICTED: proteasome activator complex subunit 3 isoform X1 [Homo sapiens]                        | 4  | 25  | ent movement; defense response     | 1.196 | 0.946 | 0.980 |
| 189168 | KIAA1970 protein, partial [Homo sapiens]                                                           | 7  | 20  | metabolic process                  | 0.941 | 0.946 | 0.928 |
| 315431 | THO complex subunit 6 homolog isoform 1 [Homo sapiens]                                             | 6  | 28  | ; regulation of biological process | 0.988 | 0.946 | 0.939 |
| 108347 | PNAS-107 [Homo sapiens]                                                                            | 6  | 34  | erentiation; response to stimulus  | 1.102 | 0.946 | 0.969 |
| 119625 | ATP-binding cassette, sub-family E (OABP), member 1 [Homo sapiens]                                 | 6  | 24  | n of biological process; transport | 1.105 | 0.946 | 1.154 |
| 119576 | hCG2043376, isoform CRA_b [Homo sapiens]                                                           | 3  | 25  | cell organization and biogenesis   | 1.053 | 0.946 | 0.924 |
| 527317 | tRNA (adenine(58)-N(1))-methyltransferase non-catalytic subunit T [Homo sapiens]                   | 3  | 11  | metabolic process                  | 0.919 | 0.946 | 0.890 |

|        |                                                                     |    |     |                                        |       |       |       |
|--------|---------------------------------------------------------------------|----|-----|----------------------------------------|-------|-------|-------|
| 194383 | unnamed protein product [Homo sapiens]                              | 4  | 108 | cell organization and biogenesis       | 1.103 | 0.945 | 0.973 |
| 214659 | Chain E, Structure Of The Human Replication Protein A (Rpa) Trim    | 2  | 7   |                                        | 1.081 | 0.945 | 0.956 |
| 119594 | SCY1-like 1 (S. cerevisiae), isoform CRA_f [Homo sapiens]           | 2  | 4   | n of biological process; transport     | 1.006 | 0.945 | 0.829 |
| 126030 | Chain B, Human Mitochondrial Beta-ketoacyl Acp Synthase             | 2  | 5   | metabolic process                      | 0.961 | 0.945 | 0.834 |
| 990316 | Chain B, Crystal Structure Of Homo Sapien Glycerol-3-Phosphate      | 2  | 6   | metabolic process                      | 1.140 | 0.945 | 1.018 |
| 189053 | unnamed protein product [Homo sapiens]                              | 5  | 26  | metabolic process                      | 0.940 | 0.944 | 0.938 |
| 767994 | PREDICTED: peroxisomal acyl-coenzyme A oxidase 1 isoform X2 [       | 6  | 20  | ; regulation of biological process     | 1.010 | 0.944 | 0.945 |
| 767903 | PREDICTED: E3 ubiquitin-protein ligase UBR4 isoform X14 [Homo       | 26 | 61  | metabolic process                      | 0.961 | 0.944 | 0.975 |
| 627023 | unknown [Homo sapiens]                                              | 5  | 22  | ifferentiation; metabolic process      | 1.004 | 0.944 | 0.972 |
| 119591 | septin 2, isoform CRA_a [Homo sapiens]                              | 7  | 39  | response to stimulus; cell division    | 1.207 | 0.944 | 1.020 |
| 119601 | hCG2028724 [Homo sapiens]                                           | 11 | 68  |                                        | 0.991 | 0.944 | 1.001 |
| 119626 | vesicle docking protein p115, isoform CRA_b [Homo sapiens]          | 14 | 71  | cell organization and biogenesis       | 1.143 | 0.944 | 0.927 |
| 929654 | MYO1C variant protein [Homo sapiens]                                | 29 | 130 |                                        | 1.086 | 0.943 | 0.898 |
| 931139 | Chain C, Crystal Structure Of Pro1 Deletion Mutant Of Human Mac     | 2  | 12  |                                        | 1.226 | 0.943 | 0.753 |
| 541121 | splicing factor 3B subunit 1 isoform 1 [Homo sapiens]               | 18 | 67  | al process; response to stimulus       | 0.817 | 0.943 | 0.969 |
| 124494 | unconventional myosin-1c isoform b [Homo sapiens]                   | 29 | 135 | se to stimulus; defense response       | 1.074 | 0.943 | 0.901 |
| 119571 | suppressor of Ty 6 homolog (S. cerevisiae), isoform CRA_a [Homo     | 9  | 29  | n of biological process; transport     | 0.962 | 0.943 | 1.032 |
| 193786 | unnamed protein product [Homo sapiens]                              | 3  | 9   | d biogenesis; metabolic process        | 0.829 | 0.943 | 0.918 |
| 104346 | unnamed protein product [Homo sapiens]                              | 8  | 26  | biologic process; cell differentiation | 1.055 | 0.943 | 0.909 |
| 400375 | unnamed protein product, partial [Homo sapiens]                     | 3  | 5   |                                        | 0.983 | 0.943 | 0.997 |
| 767908 | PREDICTED: TIP41-like protein isoform X1 [Homo sapiens]             | 3  | 6   | ; regulation of biological process     | 1.039 | 0.942 | 0.984 |
| 119588 | coatamer protein complex, subunit beta, isoform CRA_a [Homo sa      | 15 | 76  | cell organization and biogenesis       | 1.049 | 0.942 | 0.960 |
| 400404 | unnamed protein product, partial [Homo sapiens]                     | 11 | 91  |                                        | 0.990 | 0.942 | 1.011 |
| 300238 | protein FAM134C [Homo sapiens]                                      | 3  | 15  | regulation of biological process       | 1.171 | 0.942 | 1.018 |
| 189053 | unnamed protein product [Homo sapiens]                              | 10 | 45  | ization and biogenesis; transport      | 1.085 | 0.941 | 0.967 |
| 400419 | unnamed protein product, partial [Homo sapiens]                     | 2  | 10  |                                        | 1.309 | 0.941 | 1.007 |
| 119624 | peptidylprolyl isomerase (cyclophilin)-like 1, isoform CRA_a [Homo  | 4  | 16  | metabolic process                      | 0.937 | 0.941 | 0.927 |
| 127799 | Aminopeptidase puromycin sensitive [Homo sapiens]                   | 24 | 214 | ic process; response to stimulus       | 0.954 | 0.941 | 0.924 |
| 194374 | unnamed protein product [Homo sapiens]                              | 4  | 25  | metabolic process                      | 1.077 | 0.940 | 0.833 |
| 620881 | NACHT, leucine rich repeat and PYD containing 2 variant, partial [H | 3  | 7   | ; regulation of biological process     | 0.858 | 0.940 | 0.905 |
| 300360 | actin-related protein 2/3 complex subunit 1A isoform 2 [Homo sapi   | 9  | 27  | nd biogenesis; defense response        | 1.049 | 0.939 | 0.866 |
| 119623 | tubulin, beta, isoform CRA_b [Homo sapiens]                         | 13 | 394 | response to stimulus; cell division    | 0.987 | 0.939 | 0.918 |
| 119627 | peroxiredoxin 1, isoform CRA_b, partial [Homo sapiens]              | 9  | 226 | gical process; defense response        | 0.962 | 0.939 | 1.002 |
| 904030 | AP1B1 [Homo sapiens]                                                | 17 | 63  | cell organization and biogenesis       | 1.051 | 0.939 | 0.910 |
| 119588 | tumor susceptibility gene 101, isoform CRA_e [Homo sapiens]         | 3  | 25  | ; cell differentiation; cell division  | 1.097 | 0.939 | 0.965 |
| 578821 | PREDICTED: atlastin-3 isoform X3 [Homo sapiens]                     | 5  | 13  | d biogenesis; metabolic process        | 1.132 | 0.939 | 1.064 |
| 530410 | PREDICTED: Golgi apparatus membrane protein TVP23 homolog B         | 2  | 4   | transport                              | 0.994 | 0.938 | 0.850 |
| 756143 | Chain A, Crystal Structure Of Autophagic Snare Complex              | 3  | 12  |                                        | 0.996 | 0.938 | 0.933 |
| 193787 | unnamed protein product [Homo sapiens]                              | 5  | 15  | gical process; metabolic process       | 1.019 | 0.938 | 0.861 |
| 767920 | PREDICTED: cell differentiation protein RCD1 homolog isoform X1     | 2  | 3   | al process; response to stimulus       | 1.057 | 0.938 | 0.952 |

|        |                                                                             |    |     |                                                 |       |       |       |
|--------|-----------------------------------------------------------------------------|----|-----|-------------------------------------------------|-------|-------|-------|
| 119572 | glycogen synthase 1 (muscle), isoform CRA_a [Homo sapiens]                  | 10 | 40  | metabolic process                               | 0.997 | 0.938 | 0.880 |
| 767989 | PREDICTED: FH1/FH2 domain-containing protein 1 isoform X4 [Homo sapiens]    | 10 | 19  | regulation of biological process                | 0.950 | 0.937 | 0.875 |
| 119582 | dynactin 4 (p62), isoform CRA_b [Homo sapiens]                              | 2  | 5   |                                                 | 0.875 | 0.937 | 0.933 |
| 119598 | transmembrane protein 41A, isoform CRA_d [Homo sapiens]                     | 2  | 8   |                                                 | 1.226 | 0.937 | 0.911 |
| 119573 | death associated protein 3, isoform CRA_e [Homo sapiens]                    | 4  | 14  | cellular process; response to stimulus          | 1.117 | 0.937 | 0.994 |
| 505132 | Chain A, Crystal Structure Of The Aminoacylation Catalytic Fragment         | 4  | 19  | metabolic process                               | 0.888 | 0.937 | 0.906 |
| 194384 | unnamed protein product [Homo sapiens]                                      | 3  | 10  | cellular differentiation; cell proliferation    | 1.313 | 0.937 | 1.005 |
| 456444 | ADAM15 isoform 1 [Homo sapiens]                                             | 7  | 19  | cellular biogenesis; defense response           | 1.109 | 0.936 | 0.899 |
| 767909 | PREDICTED: protein odr-4 homolog isoform X3 [Homo sapiens]                  | 3  | 7   |                                                 | 1.111 | 0.936 | 1.014 |
| 173242 | C2f [Homo sapiens]                                                          | 3  | 9   | metabolic process                               | 0.957 | 0.936 | 0.835 |
| 543583 | ubiquitin-conjugating enzyme E2 variant 1 isoform g [Homo sapiens]          | 5  | 14  | cellular differentiation; defense response      | 1.000 | 0.936 | 0.913 |
| 145579 | Chain D, Crystallographic And Kinetic Studies Of Human Mitochondrial        | 9  | 38  | metabolic process                               | 0.870 | 0.936 | 1.051 |
| 119579 | ring finger protein 20, isoform CRA_a [Homo sapiens]                        | 3  | 4   | cell organization and biogenesis                | 1.047 | 0.936 | 1.020 |
| 374253 | ethanolamine-phosphate cytidyltransferase isoform 5 [Homo sapiens]          | 6  | 16  | metabolic process                               | 0.963 | 0.935 | 0.849 |
| 767925 | PREDICTED: multidrug resistance-associated protein 5 isoform X2             | 2  | 2   | metabolic process; transport                    | 0.990 | 0.935 | 0.838 |
| 119620 | dynactin 1 (p150, glued homolog, Drosophila), isoform CRA_a [Homo sapiens]  | 12 | 43  | response to stimulus; metabolic process         | 1.083 | 0.935 | 0.925 |
| 194387 | unnamed protein product [Homo sapiens]                                      | 21 | 94  | regulation of biological process                | 1.076 | 0.935 | 0.958 |
| 354459 | ras-related protein Rap-1b isoform 4 [Homo sapiens]                         | 3  | 22  | cell organization and biogenesis                | 1.380 | 0.935 | 1.106 |
| 189065 | unnamed protein product [Homo sapiens]                                      | 10 | 123 | cell organization and biogenesis                | 1.030 | 0.935 | 0.976 |
| 158256 | unnamed protein product [Homo sapiens]                                      | 20 | 450 | regulation of biological process                | 1.172 | 0.935 | 0.945 |
| 119612 | family with sequence similarity 91, member A1, isoform CRA_b [Homo sapiens] | 4  | 7   |                                                 | 1.026 | 0.935 | 0.865 |
| 279237 | RecName: Full=Cingulin                                                      | 7  | 15  | response to stimulus; metabolic process         | 0.918 | 0.935 | 0.860 |
| 119580 | hypothetical protein LOC63929, isoform CRA_b [Homo sapiens]                 | 3  | 29  | metabolic process                               | 0.729 | 0.934 | 0.924 |
| 578814 | PREDICTED: replication factor C subunit 2 isoform X1 [Homo sapiens]         | 2  | 4   | response to stimulus; cellular homeostasis      | 1.091 | 0.934 | 0.949 |
| 119582 | SAR1 gene homolog B (S. cerevisiae), isoform CRA_a [Homo sapiens]           | 3  | 7   | cell organization and biogenesis                | 0.952 | 0.934 | 0.952 |
| 119612 | TAF2 RNA polymerase II, TATA box binding protein (TBP)-associated           | 3  | 5   | cell organization and biogenesis                | 0.855 | 0.934 | 0.943 |
| 119603 | DEAD (Asp-Glu-Ala-Asp) box polypeptide 28 [Homo sapiens]                    | 4  | 6   | cell organization and biogenesis                | 0.861 | 0.934 | 0.903 |
| 197692 | autoantigen La, partial [Homo sapiens]                                      | 5  | 30  | metabolic process                               | 0.971 | 0.934 | 0.938 |
| 381744 | MED1 protein [Homo sapiens]                                                 | 2  | 6   | cellular differentiation; cell proliferation    | 0.864 | 0.934 | 0.947 |
| 189502 | mitochondrial heat shock 60kD protein 1 variant 1 [Homo sapiens]            | 17 | 187 | cell organization and biogenesis                | 0.964 | 0.934 | 0.921 |
| 544346 | transformer-2 protein homolog alpha isoform 3 [Homo sapiens]                | 3  | 42  | metabolic process                               | 1.003 | 0.934 | 0.910 |
| 194388 | unnamed protein product [Homo sapiens]                                      | 19 | 436 | cellular process; response to stimulus          | 1.174 | 0.934 | 0.944 |
| 203790 | small GTP binding protein RAB7 [Homo sapiens]                               | 11 | 65  | cellular biogenesis; cellular homeostasis       | 1.220 | 0.934 | 0.890 |
| 119600 | growth hormone inducible transmembrane protein, isoform CRA_b               | 4  | 11  | cell death                                      | 1.067 | 0.934 | 0.942 |
| 194379 | unnamed protein product [Homo sapiens]                                      | 3  | 6   | regulation of biological process; cell division | 0.777 | 0.934 | 0.954 |
| 767990 | PREDICTED: Y+L amino acid transporter 2 isoform X2 [Homo sapiens]           | 2  | 3   | transport; cellular component movement          | 1.006 | 0.933 | 0.891 |
| 578833 | PREDICTED: dual specificity mitogen-activated protein kinase kinase         | 3  | 3   | defense response; cell proliferation            | 1.094 | 0.933 | 0.946 |
| 194378 | unnamed protein product [Homo sapiens]                                      | 2  | 15  | cellular movement; defense response             | 0.948 | 0.932 | 1.047 |
| 119614 | chromosome 7 open reading frame 30 [Homo sapiens]                           | 2  | 3   | regulation of biological process                | 1.374 | 0.932 | 0.989 |
| 741866 | CWF19-like protein 1 isoform 2 [Homo sapiens]                               | 2  | 3   | metabolic process                               | 1.162 | 0.932 | 0.887 |



|        |                                                                                        |    |     |                                                        |       |       |       |
|--------|----------------------------------------------------------------------------------------|----|-----|--------------------------------------------------------|-------|-------|-------|
| 576866 | cytochrome c oxidase subunit II, partial (mitochondrion) [Homo sapiens]                | 2  | 16  | transport; metabolic process                           | 0.724 | 0.932 | 0.967 |
| 119629 | hypothetical protein FLJ11305, isoform CRA_b [Homo sapiens]                            | 2  | 5   | regulation of biological process                       | 0.800 | 0.932 | 0.978 |
| 100891 | proteasome activator hPA28 suunit beta [Homo sapiens]                                  | 6  | 34  | cell movement; defense response                        | 1.019 | 0.932 | 1.074 |
| 119599 | phospholipase C, eta 1, isoform CRA_c [Homo sapiens]                                   | 2  | 4   | cellular process; response to stimulus                 | 0.897 | 0.932 | 0.987 |
| 767942 | PREDICTED: pre-mRNA-processing factor 17 isoform X1 [Homo sapiens]                     | 3  | 8   | cellular process; metabolic process; transport         | 1.215 | 0.932 | 1.034 |
| 400443 | unnamed protein product, partial [Homo sapiens]                                        | 3  | 3   |                                                        | 1.100 | 0.932 | 0.961 |
| 119574 | guanine nucleotide binding protein (G protein), beta polypeptide 2 [Homo sapiens]      | 16 | 185 | cellular development; cellular homeostasis             | 1.077 | 0.932 | 0.932 |
| 119579 | adaptor-related protein complex 1, gamma 1 subunit, isoform CRA_a [Homo sapiens]       | 13 | 46  | regulation of biological process                       | 1.112 | 0.932 | 0.945 |
| 768040 | PREDICTED: sterol-4-alpha-carboxylate 3-dehydrogenase, decarboxylase [Homo sapiens]    | 8  | 39  | cellular process; response to stimulus                 | 1.110 | 0.931 | 1.075 |
| 193784 | unnamed protein product [Homo sapiens]                                                 | 6  | 16  | cellular development; cell differentiation             | 0.940 | 0.931 | 0.988 |
| 767927 | PREDICTED: ATP-binding cassette sub-family F member 3 isoform X1 [Homo sapiens]        | 8  | 25  | cellular response; response to stimulus                | 1.073 | 0.931 | 0.976 |
| 126031 | Chain A, Crystal Structure Of Engineered Thimet Oligopeptidase Variant [Homo sapiens]  | 4  | 12  | metabolic process                                      | 0.997 | 0.931 | 0.892 |
| 768033 | PREDICTED: ubiquitin-like modifier-activating enzyme 1 isoform X1 [Homo sapiens]       | 26 | 225 | response to stimulus; cell death                       | 1.083 | 0.931 | 0.950 |
| 353251 | Chain G, The Crystal Structure Of The Catalytic Domain Of Amsh [Homo sapiens]          | 2  | 12  |                                                        | 0.882 | 0.931 | 0.933 |
| 221043 | unnamed protein product [Homo sapiens]                                                 | 2  | 2   | biological process; cell differentiation               | 0.700 | 0.931 | 1.111 |
| 767990 | PREDICTED: vacuolar protein sorting-associated protein 35 isoform X1 [Homo sapiens]    | 12 | 64  | regulation of biological process                       | 1.012 | 0.931 | 0.976 |
| 409825 | unnamed protein product, partial [Homo sapiens]                                        | 5  | 28  |                                                        | 0.975 | 0.931 | 0.953 |
| 767974 | PREDICTED: leukotriene A-4 hydrolase isoform X2 [Homo sapiens]                         | 10 | 35  | response to stimulus; cell differentiation             | 1.027 | 0.930 | 0.946 |
| 140426 | unnamed protein product [Homo sapiens]                                                 | 6  | 17  | response to stimulus; defense response                 | 0.929 | 0.930 | 0.864 |
| 141501 | protein syndesmos isoform 1 [Homo sapiens]                                             | 4  | 9   | metabolic process                                      | 1.530 | 0.930 | 1.026 |
| 260593 | axa-Pro dipeptidase isoform 2 [Homo sapiens]                                           | 5  | 14  | metabolic process                                      | 0.821 | 0.930 | 0.936 |
| 139398 | unnamed protein product [Homo sapiens]                                                 | 4  | 7   |                                                        | 0.862 | 0.930 | 0.908 |
| 119599 | coatamer protein complex, subunit gamma, isoform CRA_a [Homo sapiens]                  | 17 | 80  | cellular process; cellular component movement          | 1.050 | 0.929 | 0.926 |
| 194383 | unnamed protein product [Homo sapiens]                                                 | 4  | 12  | cellular development and biogenesis; metabolic process | 0.957 | 0.929 | 0.860 |
| 119624 | ribosomal protein S18, isoform CRA_c [Homo sapiens]                                    | 6  | 113 | cellular development and biogenesis; transport         | 1.172 | 0.929 | 0.956 |
| 187960 | ubiquitin-protein ligase E3C [Homo sapiens]                                            | 10 | 29  | metabolic process                                      | 1.015 | 0.929 | 0.841 |
| 104360 | RNA binding motif protein 8A [Homo sapiens]                                            | 3  | 11  | initiation of biological process; transport            | 0.868 | 0.929 | 0.873 |
| 128046 | Golgi membrane protein 1 [Homo sapiens]                                                | 7  | 33  | regulation of biological process                       | 0.936 | 0.928 | 0.931 |
| 156208 | KIAA1907 protein, partial [Homo sapiens]                                               | 3  | 6   | cellular proliferation; cell differentiation           | 0.982 | 0.927 | 0.843 |
| 530410 | PREDICTED: dehydrogenase/reductase SDR family member 7B isoform X1 [Homo sapiens]      | 8  | 22  | metabolic process                                      | 0.988 | 0.927 | 0.883 |
| 119608 | tubulin, beta 2C, isoform CRA_b [Homo sapiens]                                         | 20 | 515 | cellular response; response to stimulus                | 1.023 | 0.927 | 0.911 |
| 119603 | cirrhosis, autosomal recessive 1A (cirhin), isoform CRA_g [Homo sapiens]               | 5  | 11  | regulation of biological process                       | 1.115 | 0.927 | 0.876 |
| 403528 | PDCD11 protein, partial [Homo sapiens]                                                 | 8  | 16  | metabolic process                                      | 1.011 | 0.927 | 0.910 |
| 163931 | Chain H, Crystal Structure Of Human Short-Chain Acyl Coa Dehydrogenase [Homo sapiens]  | 5  | 8   | metabolic process                                      | 1.030 | 0.927 | 0.874 |
| 578808 | PREDICTED: LETM1 and EF-hand domain-containing protein 1, mitochondrial [Homo sapiens] | 7  | 27  | cell organization and biogenesis                       | 1.070 | 0.926 | 1.021 |
| 530402 | PREDICTED: poly(A) polymerase alpha isoform X2 [Homo sapiens]                          | 3  | 5   | regulation of biological process                       | 0.981 | 0.926 | 0.946 |
| 189065 | unnamed protein product [Homo sapiens]                                                 | 5  | 34  | regulation of biological process                       | 0.862 | 0.926 | 0.911 |
| 119632 | aspartyl-tRNA synthetase, isoform CRA_b [Homo sapiens]                                 | 21 | 135 | cell organization and biogenesis                       | 1.022 | 0.926 | 0.910 |
| 119372 | beta-galactosidase isoform b [Homo sapiens]                                            | 10 | 37  | metabolic process                                      | 1.100 | 0.926 | 0.927 |
| 119620 | ancient ubiquitous protein 1, isoform CRA_a [Homo sapiens]                             | 6  | 9   | regulation of biological process                       | 1.084 | 0.926 | 0.850 |

|        |                                                                     |    |     |                                     |       |       |       |
|--------|---------------------------------------------------------------------|----|-----|-------------------------------------|-------|-------|-------|
| 892389 | peroxisomal membrane protein 2 [Homo sapiens]                       | 4  | 17  |                                     | 0.832 | 0.925 | 0.932 |
| 189065 | unnamed protein product [Homo sapiens]                              | 10 | 60  | cell organization and biogenesis    | 1.176 | 0.925 | 0.957 |
| 452405 | succinate dehydrogenase [ubiquinone] cytochrome b small subun       | 2  | 5   | metabolic process                   | 0.854 | 0.925 | 0.932 |
| 347828 | CCDC47 protein, partial [Homo sapiens]                              | 6  | 21  | d biogenesis; metabolic process     | 1.021 | 0.925 | 0.885 |
| 119588 | zinc finger protein 289, ID1 regulated, isoform CRA_e [Homo sapie   | 6  | 14  | ; regulation of biological process  | 1.081 | 0.925 | 0.998 |
| 484254 | Chain C, Structure Of The Signal Recognition Particle Interacting V | 5  | 22  | ; regulation of biological process  | 1.155 | 0.925 | 0.900 |
| 194381 | unnamed protein product [Homo sapiens]                              | 6  | 11  | al process; response to stimulus    | 0.961 | 0.925 | 0.828 |
| 119578 | hypothetical protein LOC144501, isoform CRA_c [Homo sapiens]        | 3  | 16  | ization and biogenesis; transport   | 1.065 | 0.924 | 1.325 |
| 720062 | Chain A, Crystal Structure Of Ythdf1 Yth Domain In Complex With     | 2  | 5   |                                     | 1.179 | 0.924 | 1.006 |
| 158261 | unnamed protein product [Homo sapiens]                              | 16 | 60  | ent movement; defense response      | 1.160 | 0.924 | 0.958 |
| 768002 | PREDICTED: unconventional myosin-IXb isoform X8 [Homo sapien        | 2  | 2   | cell organization and biogenesis    | 0.826 | 0.924 | 0.944 |
| 767922 | PREDICTED: E3 ubiquitin-protein ligase ARIH2 isoform X6 [Homo       | 2  | 4   | ss; cell growth; cell proliferation | 1.090 | 0.924 | 0.943 |
| 104366 | unnamed protein product [Homo sapiens]                              | 3  | 10  | ; regulation of biological process  | 0.836 | 0.923 | 0.926 |
| 463625 | Splicing factor 3b, subunit 3, 130kDa [Homo sapiens]                | 32 | 161 | ; regulation of biological process  | 1.084 | 0.923 | 0.921 |
| 119572 | DnaJ (Hsp40) homolog, subfamily C, member 16, isoform CRA_a [       | 2  | 6   | ; regulation of biological process  | 0.908 | 0.923 | 0.904 |
| 158255 | unnamed protein product [Homo sapiens]                              | 9  | 24  | ; defense response; cell division   | 1.035 | 0.922 | 0.919 |
| 530387 | PREDICTED: erlin-2 isoform X1 [Homo sapiens]                        | 5  | 28  | al process; response to stimulus    | 1.171 | 0.922 | 0.889 |
| 609412 | Chain A, Crystal Structure Of Human Mlh1                            | 4  | 11  | ic process; response to stimulus    | 0.943 | 0.922 | 0.928 |
| 119599 | signal recognition particle receptor, B subunit, isoform CRA_b [Hc  | 5  | 37  | al process; response to stimulus    | 1.080 | 0.922 | 0.928 |
| 913159 | neuropolypeptide h3 [human, brain, Peptide, 186 aa]                 | 7  | 42  |                                     | 1.109 | 0.922 | 0.961 |
| 221044 | unnamed protein product [Homo sapiens]                              | 5  | 12  | metabolic process; transport        | 1.053 | 0.922 | 0.949 |
| 680822 | hypothetical protein, partial [Homo sapiens]                        | 2  | 3   | ; regulation of biological process  | 1.147 | 0.921 | 0.985 |
| 180887 | Tubulin, beta [Homo sapiens]                                        | 20 | 542 | sponse to stimulus; cell division   | 1.032 | 0.921 | 0.921 |
| 620876 | myosin head domain containing 1 variant, partial [Homo sapiens]     | 2  | 3   | metabolic process                   | 1.040 | 0.921 | 0.805 |
| 361132 | Chain A, Structure Of Ddb1-Ddb2-Cul4a-Rbx1 Bound To A 12 Bp A       | 7  | 21  | metabolic process                   | 0.956 | 0.921 | 1.004 |
| 119610 | MYB binding protein (P160) 1a, isoform CRA_b [Homo sapiens]         | 15 | 55  | unication; response to stimulus     | 1.014 | 0.921 | 0.968 |
| 221040 | unnamed protein product [Homo sapiens]                              | 4  | 6   | cell organization and biogenesis    | 0.886 | 0.921 | 0.927 |
| 563317 | FGFR2-AHCYL1 fusion kinase protein [Homo sapiens]                   | 11 | 57  | onse; transport; cell proliferation | 0.970 | 0.921 | 0.974 |
| 767909 | PREDICTED: keratinocyte proline-rich protein isoform X1 [Homo s     | 3  | 6   |                                     | 0.893 | 0.921 | 1.610 |
| 158258 | unnamed protein product [Homo sapiens]                              | 18 | 70  | metabolic process                   | 0.986 | 0.920 | 0.843 |
| 767969 | PREDICTED: probable ATP-dependent RNA helicase DDX10 isofor         | 3  | 4   | metabolic process                   | 1.002 | 0.920 | 0.962 |
| 127802 | Protein kinase C, iota [Homo sapiens]                               | 2  | 13  | ovement; response to stimulus       | 1.126 | 0.920 | 0.959 |
| 119573 | dolichyl-phosphate mannosyltransferase polypeptide 3, isoform C     | 2  | 17  | ; regulation of biological process  | 1.121 | 0.920 | 0.881 |
| 761232 | Chain A, Complex Of Human Eif4e With The 4e Binding Protein 4e      | 3  | 6   |                                     | 0.954 | 0.920 | 0.884 |
| 281750 | Similar to ring finger protein 40, partial [Homo sapiens]           | 5  | 7   | ogenesis; response to stimulus      | 0.915 | 0.919 | 0.960 |
| 119610 | hCG1987397, isoform CRA_c [Homo sapiens]                            | 2  | 6   | ; regulation of biological process  | 0.938 | 0.919 | 0.943 |
| 742261 | Chain q, Minimal U1 Snrnp                                           | 3  | 27  |                                     | 1.137 | 0.919 | 0.945 |
| 768021 | PREDICTED: splicing factor U2AF 35 kDa subunit isoform X1 [Hom      | 4  | 56  | ; regulation of biological process  | 1.093 | 0.919 | 0.942 |
| 114325 | YRDC protein, partial [Homo sapiens]                                | 3  | 6   | regulation of biological process    | 1.005 | 0.919 | 0.897 |
| 767922 | PREDICTED: neurobeachin-like protein 2 isoform X5 [Homo sapien      | 4  | 7   | cell organization and biogenesis    | 0.889 | 0.919 | 0.929 |

|        |                                                                                 |    |     |                                       |       |       |       |
|--------|---------------------------------------------------------------------------------|----|-----|---------------------------------------|-------|-------|-------|
| 194385 | unnamed protein product [Homo sapiens]                                          | 3  | 7   | al process; response to stimulus      | 0.817 | 0.919 | 0.852 |
| 119593 | B-cell receptor-associated protein 31, isoform CRA_a [Homo sapiens]             | 8  | 43  | regulation of biological process      | 0.985 | 0.919 | 0.922 |
| 194376 | unnamed protein product [Homo sapiens]                                          | 8  | 65  | metabolic process                     | 0.947 | 0.919 | 0.943 |
| 756142 | Chain s, Human Constitutive 20s Proteasome In Complex With Cap1                 | 5  | 18  |                                       | 0.898 | 0.919 | 0.901 |
| 330689 | Chain A, Crystal Structure Of Human Flap Endonuclease Fen1 (Wt)                 | 3  | 12  | ic process; response to stimulus      | 0.880 | 0.919 | 1.042 |
| 158256 | unnamed protein product [Homo sapiens]                                          | 27 | 883 | ent movement; defense response        | 1.227 | 0.919 | 0.995 |
| 119600 | CD47 antigen (Rh-related antigen, integrin-associated signal trans              | 3  | 11  | s; cellular component movement        | 1.051 | 0.919 | 1.023 |
| 384892 | membrane glycoprotein gp140, partial [Homo sapiens]                             | 7  | 18  |                                       | 0.981 | 0.919 | 0.884 |
| 119579 | ubiquitin specific peptidase 9, X-linked, isoform CRA_d [Homo sapiens]          | 12 | 36  | imulus; cell growth; cell division    | 1.026 | 0.918 | 0.968 |
| 221039 | unnamed protein product [Homo sapiens]                                          | 6  | 7   | cell organization and biogenesis      | 1.138 | 0.918 | 0.970 |
| 119593 | GDP dissociation inhibitor 1, isoform CRA_b [Homo sapiens]                      | 15 | 160 | us; transport; metabolic process      | 1.157 | 0.918 | 0.888 |
| 189065 | unnamed protein product [Homo sapiens]                                          | 6  | 16  | ic process; response to stimulus      | 1.146 | 0.918 | 0.958 |
| 518739 | LRP10 protein, partial [Homo sapiens]                                           | 2  | 2   | transport                             | 0.902 | 0.918 | 0.909 |
| 756142 | Chain q, Human Constitutive 20s Proteasome In Complex With Cap1                 | 8  | 50  |                                       | 0.929 | 0.917 | 1.039 |
| 767937 | PREDICTED: leucine--tRNA ligase, cytoplasmic isoform X3 [Homo sapiens]          | 12 | 50  | ; regulation of biological process    | 1.115 | 0.917 | 0.958 |
| 323276 | COMMD3-BMI1 read-through protein [Homo sapiens]                                 | 2  | 6   |                                       | 1.313 | 0.917 | 1.051 |
| 119596 | protein tyrosine phosphatase, non-receptor type 1, isoform CRA_b [Homo sapiens] | 6  | 16  | cell organization and biogenesis      | 0.887 | 0.917 | 0.944 |
| 119582 | hCG1783090 [Homo sapiens]                                                       | 12 | 116 | metabolic process                     | 0.993 | 0.917 | 0.879 |
| 530418 | PREDICTED: transmembrane 9 superfamily member 4 isoform X1 [Homo sapiens]       | 8  | 41  |                                       | 1.056 | 0.916 | 0.976 |
| 119616 | mitochondrial ribosomal protein S27, isoform CRA_b [Homo sapiens]               | 4  | 7   | d biogenesis; metabolic process       | 0.946 | 0.916 | 0.896 |
| 119607 | ubiquitin-conjugating enzyme E2 variant 2, isoform CRA_c [Homo sapiens]         | 4  | 13  | logical process; cell proliferation   | 0.958 | 0.916 | 0.870 |
| 340188 | H+ -ATPase C subunit, partial [Homo sapiens]                                    | 4  | 11  | cell organization and biogenesis      | 1.002 | 0.916 | 0.906 |
| 767958 | PREDICTED: serine/threonine-protein kinase WNK2 isoform X17 [Homo sapiens]      | 2  | 3   | al process; response to stimulus      | 0.728 | 0.916 | 0.954 |
| 381972 | RPN2 protein, partial [Homo sapiens]                                            | 13 | 107 | ; transport; response to stimulus     | 1.138 | 0.916 | 0.992 |
| 768010 | PREDICTED: nectin-2 isoform X1 [Homo sapiens]                                   | 4  | 6   | al process; response to stimulus      | 0.859 | 0.916 | 0.953 |
| 530378 | PREDICTED: N-alpha-acetyltransferase 15, NatA auxiliary subunit i               | 7  | 30  | ; regulation of biological process    | 1.026 | 0.916 | 0.830 |
| 119598 | proteasome (prosome, macropain) 26S subunit, non-ATPase, 2, iso                 | 24 | 121 | ent movement; defense response        | 1.061 | 0.914 | 0.904 |
| 559568 | keratin, type I cytoskeletal 9 [Homo sapiens]                                   | 25 | 144 | cell organization and biogenesis      | 1.007 | 0.914 | 2.032 |
| 767960 | PREDICTED: phosphatidylinositol 5-phosphate 4-kinase type-2 alp                 | 2  | 6   | ; regulation of biological process    | 1.376 | 0.914 | 1.012 |
| 119619 | implantation-associated protein, isoform CRA_b [Homo sapiens]                   | 5  | 26  | ; regulation of biological process    | 1.015 | 0.914 | 0.897 |
| 767935 | PREDICTED: cyclin-dependent kinase 7 isoform X1 [Homo sapiens]                  | 2  | 6   | us; cell proliferation; cell division | 0.809 | 0.913 | 0.932 |
| 620890 | chaperonin containing TCP1, subunit 6A isoform a variant, partial               | 15 | 130 | metabolic process                     | 1.004 | 0.913 | 0.903 |
| 310689 | Chain A, Crystal Structure Of Cugbp1 Rrm1/2-rna Complex                         | 4  | 17  |                                       | 0.897 | 0.913 | 0.841 |
| 180446 | RPL14 protein [Homo sapiens]                                                    | 4  | 46  | zation and biogenesis; transport      | 0.939 | 0.913 | 0.881 |
| 122920 | Chain F, Crystal Structure Of A Protein Phosphatase 2a (Pp2a) Hol               | 8  | 63  |                                       | 1.199 | 0.913 | 0.885 |
| 189053 | unnamed protein product [Homo sapiens]                                          | 12 | 62  | cell organization and biogenesis      | 1.050 | 0.913 | 0.933 |
| 131118 | Unknown (protein for IMAGE:2901253), partial [Homo sapiens]                     | 5  | 16  | metabolic process                     | 0.975 | 0.912 | 1.094 |
| 281755 | FARSA protein, partial [Homo sapiens]                                           | 6  | 15  | metabolic process                     | 0.947 | 0.912 | 1.030 |
| 194374 | unnamed protein product [Homo sapiens]                                          | 2  | 5   | cell organization and biogenesis      | 1.024 | 0.912 | 0.987 |
| 119613 | mitogen-activated protein kinase-activated protein kinase 2, isoform            | 3  | 7   | lus; defense response; transport      | 0.789 | 0.912 | 0.981 |

|        |                                                                      |    |     |                                     |       |       |       |
|--------|----------------------------------------------------------------------|----|-----|-------------------------------------|-------|-------|-------|
| 578804 | PREDICTED: integrin alpha-6 isoform X2 [Homo sapiens]                | 6  | 14  | n; cellular component movement      | 0.929 | 0.912 | 0.895 |
| 119607 | transmembrane protein 70, isoform CRA_a [Homo sapiens]               | 3  | 5   | cell organization and biogenesis    | 1.052 | 0.912 | 0.919 |
| 119586 | importin 4, isoform CRA_d [Homo sapiens]                             | 12 | 57  | zation and biogenesis; transport    | 1.050 | 0.912 | 0.928 |
| 186186 | unnamed protein product [Homo sapiens]                               | 7  | 20  |                                     | 0.994 | 0.912 | 0.874 |
| 119604 | nuclear factor I/X (CCAAT-binding transcription factor), isoform CF  | 4  | 30  | bolic process; cell differentiation | 0.980 | 0.912 | 1.108 |
| 767965 | PREDICTED: protein arginine N-methyltransferase 3 isoform X1 [H      | 2  | 8   | cell organization and biogenesis    | 0.952 | 0.911 | 0.866 |
| 194377 | unnamed protein product [Homo sapiens]                               | 5  | 13  |                                     | 0.839 | 0.911 | 0.867 |
| 119617 | Ts translation elongation factor, mitochondrial, isoform CRA_d [H    | 5  | 13  | ; regulation of biological process  | 1.155 | 0.911 | 0.920 |
| 702035 | unnamed protein product [Homo sapiens]                               | 7  | 24  |                                     | 1.043 | 0.911 | 0.899 |
| 119581 | nucleophosmin (nucleolar phosphoprotein B23, numatrin), isoform      | 8  | 76  | ; regulation of biological process  | 1.046 | 0.911 | 0.940 |
| 530401 | PREDICTED: N-alpha-acetyltransferase 25, NatB auxiliary subunit i    | 4  | 8   | metabolic process                   | 0.933 | 0.911 | 0.885 |
| 221042 | unnamed protein product [Homo sapiens]                               | 4  | 9   | al process; response to stimulus    | 1.081 | 0.911 | 0.932 |
| 219517 | GEMIN5 protein [Homo sapiens]                                        | 6  | 12  | d biogenesis; metabolic process     | 0.900 | 0.910 | 0.949 |
| 171024 | protein disulfide isomerase-related protein 5, partial [Homo sapien  | 7  | 129 | o stimulus; cellular homeostasis    | 1.167 | 0.910 | 0.941 |
| 346986 | bis(5'-nucleosyl)-tetraphosphatase [asymmetrical] [Homo sapiens]     | 2  | 4   | us; metabolic process; cell death   | 0.946 | 0.910 | 0.923 |
| 119627 | poly(A) binding protein, cytoplasmic 4 (inducible form), isoform CF  | 16 | 94  | metabolic process; coagulation      | 1.065 | 0.910 | 0.913 |
| 28876  | ash protein, partial [Homo sapiens]                                  | 2  | 8   | sis; transport; defense response    | 0.921 | 0.910 | 0.874 |
| 189065 | unnamed protein product [Homo sapiens]                               | 27 | 322 | zation and biogenesis; transport    | 1.226 | 0.910 | 0.901 |
| 482676 | Chain D, Nucleotide-free Dynamin 1-like Protein (dnm1l, Drp1, Dlp    | 13 | 30  |                                     | 0.974 | 0.910 | 0.943 |
| 767964 | PREDICTED: sphingosine-1-phosphate lyase 1 isoform X2 [Homo s        | 10 | 30  | al process; response to stimulus    | 1.065 | 0.910 | 0.962 |
| 119614 | coiled-coil domain containing 44, isoform CRA_b [Homo sapiens]       | 2  | 3   | regulation of biological process    | 0.882 | 0.910 | 0.966 |
| 476883 | unknown [Homo sapiens]                                               | 2  | 8   | transport; metabolic process        | 0.923 | 0.909 | 0.938 |
| 119576 | DEAD (Asp-Glu-Ala-Asp) box polypeptide 20, isoform CRA_b [Hom        | 3  | 8   | d biogenesis; metabolic process     | 0.901 | 0.909 | 0.894 |
| 119617 | heterogeneous nuclear ribonucleoprotein A1, isoform CRA_e [Hor       | 11 | 111 | metabolic process; transport        | 1.131 | 0.909 | 1.102 |
| 326205 | ATP-dependent RNA helicase DDX1 [Homo sapiens]                       | 10 | 47  | biological process; development     | 1.069 | 0.909 | 0.962 |
| 525457 | hypothetical protein, partial [Homo sapiens]                         | 3  | 5   | metabolic process                   | 0.806 | 0.909 | 0.769 |
| 768040 | PREDICTED: translocon-associated protein subunit delta isoform       | 5  | 48  | zation and biogenesis; transport    | 1.302 | 0.909 | 0.958 |
| 767927 | PREDICTED: D-beta-hydroxybutyrate dehydrogenase, mitochondri         | 6  | 28  | metabolic process                   | 1.014 | 0.909 | 0.881 |
| 189053 | unnamed protein product [Homo sapiens]                               | 3  | 21  | ; regulation of biological process  | 0.934 | 0.909 | 0.903 |
| 119607 | hypothetical protein MGC11257, isoform CRA_a, partial [Homo sap      | 2  | 13  |                                     | 0.965 | 0.909 | 0.927 |
| 221044 | unnamed protein product, partial [Homo sapiens]                      | 4  | 7   | metabolic process                   | 1.053 | 0.909 | 0.814 |
| 123207 | huMCM2 [Homo sapiens]                                                | 17 | 65  | biogenesis; response to stimulus    | 1.049 | 0.908 | 0.944 |
| 119569 | hCG1640785, isoform CRA_a [Homo sapiens]                             | 3  | 25  |                                     | 0.861 | 0.908 | 0.889 |
| 936854 | c3orf1 hypothetical protein, M5-14 alternatively spliced product, si | 2  | 8   | metabolic process                   | 0.991 | 0.907 | 0.884 |
| 119588 | dendritic cell protein, isoform CRA_b [Homo sapiens]                 | 3  | 5   | ; regulation of biological process  | 0.972 | 0.907 | 0.972 |
| 140103 | tropomyosin 4-anaplastic lymphoma kinase fusion protein minor is     | 5  | 111 |                                     | 1.117 | 0.907 | 0.947 |
| 578821 | PREDICTED: serine/threonine-protein phosphatase 6 regulatory su      | 4  | 8   | cell organization and biogenesis    | 0.936 | 0.907 | 0.817 |
| 119587 | hCG1983504, isoform CRA_a [Homo sapiens]                             | 14 | 260 | s; cellular component movement      | 1.036 | 0.906 | 0.897 |
| 119590 | KIAA0133, isoform CRA_a [Homo sapiens]                               | 4  | 9   |                                     | 0.970 | 0.906 | 0.845 |
| 767911 | PREDICTED: glycosaminoglycan xylosylkinase isoform X2 [Homo          | 2  | 4   | metabolic process                   | 0.987 | 0.906 | 0.860 |



|        |                                                                            |    |     |                                                 |       |       |       |
|--------|----------------------------------------------------------------------------|----|-----|-------------------------------------------------|-------|-------|-------|
| 119595 | oxysterol binding protein-like 2, isoform CRA_b, partial [Homo sapiens]    | 2  | 6   | transport                                       | 0.846 | 0.906 | 0.869 |
| 749197 | Chain A, Crystal Structure Of Human Camp-dependent Protein Kinase          | 5  | 14  |                                                 | 1.113 | 0.906 | 0.955 |
| 189053 | unnamed protein product [Homo sapiens]                                     | 2  | 18  | cell organization and biogenesis                | 0.999 | 0.905 | 0.871 |
| 128048 | N-ethylmaleimide-sensitive factor attachment protein, gamma [Homo sapiens] | 2  | 5   | regulation of biological process                | 0.746 | 0.905 | 0.928 |
| 119620 | malate dehydrogenase 1, NAD (soluble), isoform CRA_d [Homo sapiens]        | 10 | 49  | biological process; metabolic process           | 1.095 | 0.905 | 0.923 |
| 741365 | LDLR chaperone MESD precursor [Homo sapiens]                               | 3  | 7   | cellular process; response to stimulus          | 1.190 | 0.905 | 1.095 |
| 144245 | RPL14 protein [Homo sapiens]                                               | 4  | 46  | cellular organization and biogenesis; transport | 0.932 | 0.904 | 0.881 |
| 578816 | PREDICTED: regulator of microtubule dynamics protein 1 isoform 1           | 2  | 2   |                                                 | 1.203 | 0.904 | 0.857 |
| 194375 | unnamed protein product [Homo sapiens]                                     | 8  | 43  | regulation of biological process                | 0.982 | 0.904 | 0.904 |
| 116812 | epimerase family protein SDR39U1 isoform 1 [Homo sapiens]                  | 3  | 8   | metabolic process                               | 0.789 | 0.904 | 0.880 |
| 194388 | unnamed protein product [Homo sapiens]                                     | 13 | 38  | cell organization and biogenesis                | 0.971 | 0.904 | 0.943 |
| 194382 | unnamed protein product, partial [Homo sapiens]                            | 6  | 24  | metabolic process                               | 0.951 | 0.904 | 0.899 |
| 119574 | hCG1734196, isoform CRA_a [Homo sapiens]                                   | 2  | 8   | cell organization and biogenesis                | 0.839 | 0.904 | 0.921 |
| 194388 | unnamed protein product [Homo sapiens]                                     | 6  | 16  | regulation of biological process                | 0.903 | 0.903 | 0.877 |
| 895741 | succinate dehydrogenase complex subunit A, partial [Homo sapiens]          | 14 | 135 | metabolic process; transport                    | 1.040 | 0.903 | 0.926 |
| 158254 | unnamed protein product [Homo sapiens]                                     | 7  | 36  | defense response; cell differentiation          | 1.154 | 0.903 | 0.924 |
| 578811 | PREDICTED: p21-activated protein kinase-interacting protein 1 isoform 1    | 2  | 4   | regulation of biological process                | 1.060 | 0.903 | 0.856 |
| 371872 | transmembrane and coiled-coil domain-containing protein 1 isoform 1        | 2  | 10  |                                                 | 0.797 | 0.903 | 0.905 |
| 380139 | TKT protein, partial [Homo sapiens]                                        | 19 | 228 | regulation of biological process                | 1.089 | 0.903 | 0.870 |
| 768021 | PREDICTED: trafficking protein particle complex subunit 10 isoform 1       | 2  | 4   | cell organization and biogenesis                | 1.121 | 0.903 | 0.917 |
| 550343 | BAP31 [Homo sapiens]                                                       | 8  | 37  | transport                                       | 0.989 | 0.903 | 0.922 |
| 414721 | unknown, partial [Homo sapiens]                                            | 9  | 73  | cellular movement; defense response             | 1.250 | 0.903 | 0.898 |
| 119568 | dystrophin (homologous to dystrophin), isoform CRA_a [Homo sapiens]        | 18 | 41  | regulation of biological process                | 0.979 | 0.903 | 0.888 |
| 187119 | pM5 (3' partial), partial [Homo sapiens]                                   | 20 | 63  |                                                 | 1.054 | 0.902 | 0.868 |
| 194379 | unnamed protein product [Homo sapiens]                                     | 2  | 4   | regulation of biological process                | 0.752 | 0.902 | 0.915 |
| 331505 | GTP:ATP phosphotransferase [Homo sapiens]                                  | 3  | 7   | metabolic process; coagulation                  | 0.949 | 0.902 | 0.867 |
| 237640 | Chain B, Crystal Structure Of The Hscarg R37a Mutant                       | 6  | 9   | transport                                       | 1.019 | 0.901 | 0.843 |
| 119576 | serine-tRNA synthetase, isoform CRA_c [Homo sapiens]                       | 4  | 7   | metabolic process                               | 0.779 | 0.901 | 0.718 |
| 388328 | Chain C, Crystal Structure Of Human Otub1UBCH5B-UBUB                       | 7  | 41  |                                                 | 1.175 | 0.901 | 0.964 |
| 119598 | actin-like 6A, isoform CRA_c [Homo sapiens]                                | 4  | 21  | regulation of biological process                | 1.048 | 0.901 | 0.825 |
| 104380 | unnamed protein product [Homo sapiens]                                     | 3  | 8   | development                                     | 0.927 | 0.901 | 0.963 |
| 188036 | Chain A, Set7/9-er-sinefungin Complex                                      | 2  | 9   |                                                 | 0.871 | 0.901 | 0.766 |
| 578828 | PREDICTED: serine/threonine-protein phosphatase 4 catalytic subunit 1      | 3  | 15  | regulation of biological process                | 1.298 | 0.901 | 0.976 |
| 119601 | heat shock 70kDa protein 2, isoform CRA_a [Homo sapiens]                   | 13 | 400 | response to stimulus; metabolic process         | 1.270 | 0.901 | 0.934 |
| 505929 | cytochrome b-c1 complex subunit 2, mitochondrial precursor [Homo sapiens]  | 11 | 71  | metabolic process; transport                    | 1.007 | 0.901 | 0.962 |
| 158429 | Chain A, Crystal Structure Of Human Cbr1 In Complex With Bigf2.1           | 8  | 48  | metabolic process                               | 1.049 | 0.900 | 0.852 |
| 119587 | hydroxymethylbilane synthase, isoform CRA_c [Homo sapiens]                 | 3  | 7   | metabolic process; cell differentiation         | 0.870 | 0.900 | 0.921 |
| 724311 | KIAA1367 protein, partial [Homo sapiens]                                   | 2  | 6   | metabolic process; transport                    | 1.173 | 0.900 | 1.169 |
| 194320 | Chain A, Crystal Structure Of Nore1a In Complex With Ras                   | 3  | 21  | response to stimulus; transport                 | 1.372 | 0.900 | 1.039 |
| 119570 | aldehyde dehydrogenase 18 family, member A1, isoform CRA_b [Homo sapiens]  | 25 | 186 | metabolic process                               | 1.076 | 0.900 | 0.885 |

|        |                                                                    |    |     |                                     |       |       |       |
|--------|--------------------------------------------------------------------|----|-----|-------------------------------------|-------|-------|-------|
| 767914 | PREDICTED: dystrobrevin beta isoform X12 [Homo sapiens]            | 4  | 7   |                                     | 0.885 | 0.900 | 1.008 |
| 431822 | heat shock protein HSP 90-beta isoform c [Homo sapiens]            | 30 | 968 | cell organization and biogenesis    | 1.241 | 0.900 | 0.963 |
| 194387 | unnamed protein product [Homo sapiens]                             | 2  | 7   | nd biogenesis; defense response     | 1.108 | 0.899 | 0.959 |
| 119581 | keratin 25D [Homo sapiens]                                         | 4  | 58  |                                     | 0.895 | 0.899 | 1.462 |
| 131290 | gamma-glutamylcyclotransferase isoform 1 [Homo sapiens]            | 8  | 68  | d biogenesis; metabolic process     | 1.056 | 0.899 | 0.907 |
| 106507 | ras-related protein Rab-12 [Homo sapiens]                          | 4  | 48  | cell organization and biogenesis    | 1.110 | 0.899 | 0.839 |
| 525457 | hypothetical protein [Homo sapiens]                                | 3  | 9   |                                     | 1.143 | 0.899 | 1.006 |
| 550545 | Chain B, Crystal Structure Of Nucleotide-free Rab8:rabin8          | 9  | 70  |                                     | 1.112 | 0.898 | 0.945 |
| 400413 | unnamed protein product, partial [Homo sapiens]                    | 3  | 7   |                                     | 0.992 | 0.898 | 0.833 |
| 119618 | ATPase, Ca++ transporting, cardiac muscle, slow twitch 2, isoform  | 22 | 120 | ; coagulation; metabolic process    | 1.136 | 0.898 | 0.926 |
| 194389 | unnamed protein product [Homo sapiens]                             | 14 | 44  | ; regulation of biological process  | 1.013 | 0.898 | 0.920 |
| 296803 | ESRP1/RAF1 fusion protein [Homo sapiens]                           | 9  | 39  | metabolic process                   | 0.959 | 0.898 | 0.956 |
| 270063 | Chain A, Cdc42(T35a)                                               | 5  | 20  | al process; response to stimulus    | 1.070 | 0.898 | 1.064 |
| 767979 | PREDICTED: mitochondrial basic amino acids transporter isoform     | 6  | 13  | transport                           | 0.834 | 0.898 | 0.951 |
| 881919 | Chain D, Crystal Structure Of Human Deoxycytidine Kinase In Com    | 2  | 4   | metabolic process                   | 0.812 | 0.897 | 0.959 |
| 158259 | unnamed protein product [Homo sapiens]                             | 17 | 465 | cell organization and biogenesis    | 1.028 | 0.897 | 0.894 |
| 189069 | unnamed protein product [Homo sapiens]                             | 6  | 14  | ; regulation of biological process  | 0.969 | 0.897 | 0.910 |
| 119603 | cyclin G associated kinase, isoform CRA_b [Homo sapiens]           | 4  | 8   | ; regulation of biological process  | 1.166 | 0.897 | 0.863 |
| 183448 | Chain C, Crystal Structure Of Human Peroxisomal Delta3,5, Delta2   | 10 | 116 | metabolic process                   | 1.082 | 0.897 | 0.844 |
| 209944 | arrestin beta 1 transcript variant 2 [Homo sapiens]                | 7  | 20  | cell organization and biogenesis    | 1.177 | 0.897 | 0.912 |
| 767948 | PREDICTED: sorcin isoform X1 [Homo sapiens]                        | 5  | 25  | al process; response to stimulus    | 1.019 | 0.897 | 0.912 |
| 399786 | unnamed protein product, partial [Homo sapiens]                    | 14 | 82  |                                     | 0.927 | 0.897 | 0.929 |
| 194377 | unnamed protein product [Homo sapiens]                             | 9  | 45  | ; regulation of biological process  | 1.145 | 0.896 | 0.976 |
| 620873 | hepatoma-derived growth factor-related protein 2 isoform 1 varian  | 3  | 20  | ; regulation of biological process  | 0.909 | 0.896 | 0.955 |
| 194387 | unnamed protein product [Homo sapiens]                             | 6  | 61  | cell organization and biogenesis    | 1.012 | 0.896 | 0.872 |
| 193787 | unnamed protein product [Homo sapiens]                             | 17 | 118 | ; regulation of biological process  | 1.067 | 0.896 | 0.901 |
| 119588 | amyloid beta (A4) precursor-like protein 2, isoform CRA_d [Homo s  | 3  | 12  | cell organization and biogenesis    | 0.922 | 0.896 | 0.850 |
| 159163 | Chain A, Solution Structures Of The Hth Domain Of Human Edf-1 F    | 2  | 4   |                                     | 0.716 | 0.895 | 0.894 |
| 199241 | DNA repair protein RAD50 [Homo sapiens]                            | 8  | 28  | ic process; response to stimulus    | 1.074 | 0.895 | 0.934 |
| 140359 | unnamed protein product [Homo sapiens]                             | 2  | 2   |                                     | 0.990 | 0.895 | 0.861 |
| 119574 | vacuolar protein sorting 26 homolog A (yeast), isoform CRA_b [Ho   | 8  | 46  | transport                           | 1.052 | 0.895 | 0.910 |
| 702262 | unnamed protein product [Homo sapiens]                             | 6  | 16  | cell organization and biogenesis    | 0.925 | 0.895 | 0.946 |
| 530397 | PREDICTED: neuroblast differentiation-associated protein AHNAK     | 11 | 51  | cell organization and biogenesis    | 1.089 | 0.895 | 0.911 |
| 767951 | PREDICTED: chromodomain-helicase-DNA-binding protein 7 isofo       | 3  | 6   | nd biogenesis; cell differentiation | 0.899 | 0.895 | 0.899 |
| 374081 | ras-related protein Rab-18 isoform 3 [Homo sapiens]                | 4  | 12  | cell organization and biogenesis    | 1.053 | 0.895 | 0.996 |
| 119621 | acid phosphatase 1, soluble, isoform CRA_d [Homo sapiens]          | 5  | 29  | metabolic process                   | 1.024 | 0.895 | 1.014 |
| 119607 | transcription elongation factor A (SII), 1, isoform CRA_a [Homo sa | 7  | 40  | gical process; cell differentiation | 0.918 | 0.894 | 0.800 |
| 282744 | p50 dynamitin [Homo sapiens]                                       | 7  | 44  | abolic process; cell proliferation  | 0.973 | 0.894 | 0.882 |
| 249430 | 3'-5' RNA exonuclease [Homo sapiens]                               | 5  | 15  | ; response to stimulus; transport   | 1.062 | 0.894 | 1.000 |
| 119603 | hCG1815489 [Homo sapiens]                                          | 5  | 53  | al process; response to stimulus    | 1.144 | 0.894 | 0.911 |

|        |                                                                      |    |     |                                    |       |       |       |
|--------|----------------------------------------------------------------------|----|-----|------------------------------------|-------|-------|-------|
| 119615 | capping protein (actin filament) muscle Z-line, beta, isoform CRA_   | 11 | 79  | regulation of biological process   | 1.069 | 0.894 | 0.809 |
| 119580 | hCG31406, isoform CRA_a [Homo sapiens]                               | 2  | 3   |                                    | 1.068 | 0.894 | 0.907 |
| 300302 | adenylosuccinate lyase [Homo sapiens]                                | 5  | 10  | cell organization and biogenesis   | 1.017 | 0.894 | 0.918 |
| 193785 | unnamed protein product [Homo sapiens]                               | 6  | 10  | metabolic process; cell division   | 1.101 | 0.893 | 0.828 |
| 119598 | eukaryotic translation initiation factor 4A, isoform 2, isoform CRA_ | 13 | 96  | al process; response to stimulus   | 1.064 | 0.893 | 0.922 |
| 119612 | poly(A) binding protein, cytoplasmic 1, isoform CRA_c [Homo sapiens] | 18 | 119 | regulation of biological process   | 1.058 | 0.893 | 0.905 |
| 400408 | unnamed protein product, partial [Homo sapiens]                      | 3  | 27  |                                    | 0.839 | 0.893 | 0.841 |
| 114155 | tropomyosin alpha-3 chain isoform Tpm3.2cy [Homo sapiens]            | 12 | 156 | cellular component movement        | 1.112 | 0.892 | 0.930 |
| 122804 | nuclear pore protein, partial [Homo sapiens]                         | 9  | 36  | al process; response to stimulus   | 0.997 | 0.892 | 0.923 |
| 119588 | peroxisomal biogenesis factor 16, isoform CRA_b [Homo sapiens]       | 4  | 12  | ization and biogenesis; transport  | 0.791 | 0.892 | 0.849 |
| 278120 | Chain A, Three-Dimensional Structure Of Human Electron Transfer      | 8  | 19  |                                    | 1.132 | 0.892 | 0.983 |
| 909618 | clathrin light chain A isoform g [Homo sapiens]                      | 4  | 35  | cell organization and biogenesis   | 1.165 | 0.891 | 0.951 |
| 158260 | unnamed protein product [Homo sapiens]                               | 3  | 4   | ic process; response to stimulus   | 0.875 | 0.891 | 0.926 |
| 194374 | unnamed protein product [Homo sapiens]                               | 21 | 118 | regulation of biological process   | 1.058 | 0.891 | 0.939 |
| 509494 | hypothetical protein, partial [Homo sapiens]                         | 2  | 3   | metabolic process                  | 0.867 | 0.891 | 0.853 |
| 130971 | Similar to NADH dehydrogenase (ubiquinone) 1 alpha subcomplex        | 8  | 38  | metabolic process; transport       | 1.019 | 0.891 | 0.906 |
| 142499 | DUS3L protein, partial [Homo sapiens]                                | 2  | 5   | metabolic process                  | 0.840 | 0.891 | 0.950 |
| 119590 | tubulin-specific chaperone e, isoform CRA_c [Homo sapiens]           | 3  | 7   | ic process; response to stimulus   | 0.760 | 0.891 | 0.983 |
| 279002 | unnamed protein product [Homo sapiens]                               | 2  | 7   |                                    | 0.922 | 0.890 | 0.871 |
| 158255 | unnamed protein product [Homo sapiens]                               | 2  | 3   | al process; response to stimulus   | 1.015 | 0.890 | 0.813 |
| 323276 | NADH dehydrogenase [ubiquinone] 1 subunit C2, isoform 2 isoform      | 3  | 9   | metabolic process; transport       | 1.059 | 0.890 | 0.937 |
| 119568 | t-complex 1, isoform CRA_a [Homo sapiens]                            | 25 | 238 | regulation of biological process   | 1.081 | 0.890 | 0.899 |
| 193783 | unnamed protein product [Homo sapiens]                               | 5  | 10  |                                    | 0.864 | 0.890 | 0.899 |
| 687998 | AP-2 complex subunit mu isoform b [Homo sapiens]                     | 11 | 41  | cell organization and biogenesis   | 1.077 | 0.890 | 0.886 |
| 119578 | PTK9 protein tyrosine kinase 9, isoform CRA_a [Homo sapiens]         | 6  | 14  | regulation of biological process   | 1.212 | 0.889 | 0.983 |
| 221045 | unnamed protein product [Homo sapiens]                               | 2  | 3   | gical process; metabolic process   | 0.907 | 0.889 | 0.819 |
| 488413 | hypothetical protein, partial [Homo sapiens]                         | 7  | 26  | al process; response to stimulus   | 1.023 | 0.889 | 0.845 |
| 296278 | Chain A, Crystal Structure Of Ccm3, A Cerebral Cavernous Malform     | 3  | 11  |                                    | 0.927 | 0.889 | 0.900 |
| 723800 | unnamed protein product [Homo sapiens]                               | 4  | 52  | cell organization and biogenesis   | 1.038 | 0.889 | 0.852 |
| 189053 | unnamed protein product [Homo sapiens]                               | 4  | 33  | cell organization and biogenesis   | 1.219 | 0.889 | 0.929 |
| 119596 | KIAA1219 protein, isoform CRA_d [Homo sapiens]                       | 4  | 12  | cell organization and biogenesis   | 0.858 | 0.889 | 0.831 |
| 639928 | unknown [Homo sapiens]                                               | 2  | 6   | regulation of biological process   | 1.115 | 0.888 | 0.874 |
| 194375 | unnamed protein product [Homo sapiens]                               | 3  | 76  | n of biological process; transport | 1.117 | 0.888 | 0.838 |
| 119603 | hCG18199, isoform CRA_a [Homo sapiens]                               | 3  | 10  | regulation of biological process   | 0.814 | 0.888 | 0.889 |
| 767996 | PREDICTED: cytohesin-1 isoform X3 [Homo sapiens]                     | 3  | 10  | regulation of biological process   | 0.830 | 0.888 | 0.873 |
| 767936 | PREDICTED: secretory carrier-associated membrane protein 1 iso       | 4  | 11  | transport                          | 1.170 | 0.888 | 0.785 |
| 117558 | Phosphoinositide-3-kinase, regulatory subunit 4 [Homo sapiens]       | 2  | 6   | nd biogenesis; defense response    | 1.167 | 0.888 | 0.853 |
| 119597 | transcription factor B2, mitochondrial, isoform CRA_b [Homo sapiens] | 2  | 3   | regulation of biological process   | 0.769 | 0.888 | 0.870 |
| 119572 | branched chain ketoacid dehydrogenase kinase, isoform CRA_a [H       | 4  | 8   | metabolic process                  | 1.095 | 0.888 | 0.959 |
| 767936 | PREDICTED: geranylgeranyl transferase type-1 subunit beta isoform    | 2  | 5   | ic process; response to stimulus   | 0.949 | 0.888 | 0.925 |

|        |                                                                       |    |     |                                      |       |       |       |
|--------|-----------------------------------------------------------------------|----|-----|--------------------------------------|-------|-------|-------|
| 410991 | pyrroline-5-carboxylate reductase 2 isoform 2 [Homo sapiens]          | 4  | 43  | ic process; response to stimulus     | 1.024 | 0.887 | 0.831 |
| 110591 | Chain B, Structure Of The Binary Complex Of The E67I Mutant Of H      | 6  | 17  | metabolic process                    | 1.042 | 0.887 | 0.824 |
| 662413 | similar to T13C5.6 gene product [Caenorhabditis elegans]; similar     | 3  | 11  | zation and biogenesis; cell death    | 1.041 | 0.887 | 0.913 |
| 392513 | interleukin enhancer-binding factor 2 isoform 2 [Homo sapiens]        | 8  | 44  | ; regulation of biological process   | 0.951 | 0.887 | 0.921 |
| 119603 | thymidine kinase 2, mitochondrial, isoform CRA_a [Homo sapiens]       | 3  | 6   | metabolic process                    | 1.205 | 0.886 | 0.906 |
| 767917 | PREDICTED: 3-hydroxyisobutyryl-CoA hydrolase, mitochondrial is        | 2  | 4   | metabolic process                    | 1.099 | 0.886 | 0.900 |
| 194387 | unnamed protein product [Homo sapiens]                                | 2  | 4   | entiation; cell death; cell division | 0.997 | 0.886 | 0.938 |
| 768023 | PREDICTED: tubulin--tyrosine ligase-like protein 12 isoform X1 [H     | 8  | 26  | metabolic process                    | 1.088 | 0.886 | 1.020 |
| 147178 | glutathione peroxidase [Homo sapiens]                                 | 2  | 4   | ar homeostasis; cell proliferation   | 0.828 | 0.886 | 0.774 |
| 544194 | serine/threonine protein kinase; similar to B-raf proto-oncogene; n   | 5  | 12  | cell organization and biogenesis     | 1.105 | 0.886 | 0.902 |
| 134015 | unnamed protein product [Homo sapiens]                                | 5  | 12  | ent movement; defense response       | 1.084 | 0.886 | 0.902 |
| 34201  | unnamed protein product [Homo sapiens]                                | 4  | 25  | zation and biogenesis; transport     | 0.958 | 0.886 | 0.816 |
| 331506 | DCHT2 [Homo sapiens]                                                  | 3  | 8   | ; regulation of biological process   | 0.791 | 0.885 | 0.890 |
| 119605 | transducin (beta)-like 3, isoform CRA_e [Homo sapiens]                | 8  | 27  | al process; response to stimulus     | 1.068 | 0.885 | 0.917 |
| 240104 | Chain A, Solution Structure Of 1-112 Fragment Of Human Program        | 4  | 35  |                                      | 0.936 | 0.885 | 0.850 |
| 589811 | ribosyldihydronicotinamide dehydrogenase [quinone] isoform 2 [H       | 2  | 6   | e to stimulus; metabolic process     | 0.801 | 0.885 | 0.883 |
| 347832 | SLC25A3 protein, partial [Homo sapiens]                               | 9  | 77  | metabolic process; transport         | 0.953 | 0.885 | 0.781 |
| 396446 | DVL1 protein, partial [Homo sapiens]                                  | 2  | 4   | esponse to stimulus; cell growth     | 0.769 | 0.884 | 0.877 |
| 530367 | PREDICTED: tetratricopeptide repeat protein 27 isoform X2 [Homo       | 4  | 7   |                                      | 0.876 | 0.884 | 0.857 |
| 530537 | Chain B, Crystal Structure Of The Grp1 Ph Domain In Complex Wit       | 2  | 7   |                                      | 0.800 | 0.884 | 0.904 |
| 247307 | cytochrome P450 reductase, partial [Homo sapiens]                     | 13 | 62  | e to stimulus; metabolic process     | 1.166 | 0.884 | 0.954 |
| 168341 | nicotinamide adenine dinucleotide phosphate (NADP[H])-binding p       | 3  | 13  |                                      | 1.061 | 0.884 | 0.815 |
| 201476 | guanine nucleotide binding protein alpha 13 [Homo sapiens]            | 5  | 12  | ; coagulation; cell differentiation  | 1.009 | 0.883 | 0.888 |
| 126560 | fibroblast growth factor 2-interacting factor, partial (plasmid) [Hom | 5  | 16  | ; regulation of biological process   | 0.898 | 0.883 | 0.890 |
| 119624 | WD repeat domain 46, isoform CRA_a [Homo sapiens]                     | 2  | 5   | metabolic process                    | 0.796 | 0.882 | 0.954 |
| 608785 | C-terminal binding protein 1 isoform D [Homo sapiens]                 | 8  | 32  | bolic process; cell differentiation  | 1.037 | 0.882 | 0.894 |
| 209870 | Chain A, Crystal Structure Of The Mammalian Copii-coat Protein S      | 19 | 147 | transport                            | 0.980 | 0.882 | 0.858 |
| 767912 | PREDICTED: histone-lysine N-methyltransferase SMYD3 isoform X         | 2  | 6   | ic process; response to stimulus     | 0.889 | 0.882 | 0.909 |
| 767920 | PREDICTED: cullin-3 isoform X2 [Homo sapiens]                         | 8  | 16  | on; cell death; defense response     | 1.059 | 0.882 | 0.949 |
| 119605 | potassium channel tetramerisation domain containing 5, isoform C      | 2  | 4   | cell organization and biogenesis     | 0.843 | 0.882 | 0.841 |
| 122920 | Chain D, C6aC111A CUZN SUPEROXIDE DISMUTASE                           | 3  | 15  | metabolic process                    | 0.767 | 0.882 | 0.875 |
| 767966 | PREDICTED: methylthioribulose-1-phosphate dehydratase isoform         | 2  | 3   | ; regulation of biological process   | 0.904 | 0.882 | 0.738 |
| 768016 | PREDICTED: exportin-2 isoform X1 [Homo sapiens]                       | 23 | 143 | port; cell death; cell proliferation | 1.067 | 0.881 | 0.921 |
| 400427 | unnamed protein product, partial [Homo sapiens]                       | 3  | 19  |                                      | 1.076 | 0.881 | 0.962 |
| 767914 | PREDICTED: ras-related protein Rab-1A isoform X1 [Homo sapiens]       | 12 | 106 | se to stimulus; defense response     | 1.225 | 0.881 | 0.896 |
| 119627 | eukaryotic translation initiation factor 2B, subunit 3 gamma, 58kDa   | 3  | 8   | ; regulation of biological process   | 1.038 | 0.881 | 0.845 |
| 116283 | PAPSS1 protein, partial [Homo sapiens]                                | 5  | 29  | metabolic process                    | 1.012 | 0.881 | 0.858 |
| 493066 | glycyl-tRNA synthetase [Homo sapiens]                                 | 16 | 58  | metabolic process                    | 1.029 | 0.881 | 0.874 |
| 104352 | unnamed protein product [Homo sapiens]                                | 3  | 12  | metabolic process                    | 0.856 | 0.880 | 0.915 |
| 854189 | tropomyosin isoform [Homo sapiens]                                    | 13 | 83  | biogenesis; response to stimulus     | 1.231 | 0.880 | 0.928 |



|        |                                                                                             |    |     |                                      |       |       |       |
|--------|---------------------------------------------------------------------------------------------|----|-----|--------------------------------------|-------|-------|-------|
| 244301 | 26S protease regulatory subunit 6B isoform 2 [Homo sapiens]                                 | 6  | 30  | ent movement; defense response       | 0.999 | 0.880 | 0.929 |
| 221045 | unnamed protein product [Homo sapiens]                                                      | 7  | 47  | ; regulation of biological process   | 1.137 | 0.880 | 0.857 |
| 767973 | PREDICTED: coronin-1C isoform X1 [Homo sapiens]                                             | 5  | 19  | cell organization and biogenesis     | 0.932 | 0.880 | 0.913 |
| 194381 | unnamed protein product, partial [Homo sapiens]                                             | 3  | 6   | gical process; cell differentiation  | 0.952 | 0.880 | 0.871 |
| 119574 | SAR1 gene homolog A (S. cerevisiae), isoform CRA_a [Homo sapiens]                           | 5  | 25  | al process; response to stimulus     | 1.028 | 0.880 | 0.902 |
| 767990 | PREDICTED: V-type proton ATPase subunit d 1 isoform X1 [Homo sapiens]                       | 5  | 19  | d biogenesis; metabolic process      | 1.008 | 0.879 | 0.807 |
| 557357 | adenosine 3'-phospho 5'-phosphosulfate transporter 1 isoform c [Homo sapiens]               | 7  | 29  | ; response to stimulus; transport    | 0.859 | 0.879 | 0.762 |
| 119571 | polymerase (DNA-directed), delta interacting protein 2 [Homo sapiens]                       | 8  | 26  | cell organization and biogenesis     | 1.104 | 0.879 | 0.906 |
| 119581 | ATPase, H+ transporting, lysosomal V0 subunit a1, isoform CRA_b [Homo sapiens]              | 11 | 46  | cell organization and biogenesis     | 1.043 | 0.879 | 0.832 |
| 409785 | unnamed protein product, partial [Homo sapiens]                                             | 2  | 12  |                                      | 1.060 | 0.879 | 0.977 |
| 170640 | insulinoma-glucagonoma protein 20 splice variant 4 [Homo sapiens]                           | 2  | 3   | al process; response to stimulus     | 0.816 | 0.879 | 0.800 |
| 119571 | hCG37070, partial [Homo sapiens]                                                            | 3  | 25  | metabolic process                    | 1.013 | 0.879 | 1.046 |
| 702387 | unnamed protein product, partial [Homo sapiens]                                             | 4  | 6   | metabolic process; transport         | 0.843 | 0.878 | 0.869 |
| 767922 | PREDICTED: 2',5'-phosphodiesterase 12 isoform X1 [Homo sapiens]                             | 5  | 27  | metabolic process                    | 0.909 | 0.878 | 0.857 |
| 530430 | PREDICTED: general transcription factor IIH subunit 2-like protein [Homo sapiens]           | 2  | 4   | ; regulation of biological process   | 1.065 | 0.878 | 0.946 |
| 545687 | protein RTF2 homolog isoform d [Homo sapiens]                                               | 2  | 4   |                                      | 0.897 | 0.878 | 0.839 |
| 664922 | selenoprotein Zf1 [Homo sapiens]                                                            | 2  | 4   | gical process; metabolic process     | 0.824 | 0.878 | 0.836 |
| 768003 | PREDICTED: ras-related protein Rab-3A isoform X1 [Homo sapiens]                             | 4  | 52  | to stimulus; cell communication      | 1.200 | 0.878 | 0.852 |
| 158256 | unnamed protein product [Homo sapiens]                                                      | 2  | 17  | ; regulation of biological process   | 0.977 | 0.878 | 1.012 |
| 767956 | PREDICTED: structural maintenance of chromosomes protein 2 isoform 1 [Homo sapiens]         | 8  | 24  | f biological process; cell division  | 1.017 | 0.877 | 0.977 |
| 158257 | unnamed protein product, partial [Homo sapiens]                                             | 12 | 58  | logical process; cell proliferation  | 0.978 | 0.877 | 0.910 |
| 767913 | PREDICTED: leucine-rich PPR motif-containing protein, mitochondrial [Homo sapiens]          | 31 | 119 | component movement; transport        | 1.059 | 0.876 | 0.895 |
| 119610 | hCG1986053, isoform CRA_b [Homo sapiens]                                                    | 4  | 8   |                                      | 0.920 | 0.876 | 0.878 |
| 767977 | PREDICTED: replication factor C subunit 3 isoform X5 [Homo sapiens]                         | 3  | 12  | o stimulus; cellular homeostasis     | 0.900 | 0.876 | 0.843 |
| 194387 | unnamed protein product [Homo sapiens]                                                      | 11 | 98  | transport                            | 0.983 | 0.876 | 0.911 |
| 194373 | unnamed protein product [Homo sapiens]                                                      | 5  | 9   | gical process; cell differentiation  | 1.141 | 0.876 | 1.012 |
| 189053 | unnamed protein product [Homo sapiens]                                                      | 4  | 11  | metabolic process                    | 1.116 | 0.876 | 0.933 |
| 114794 | Chain D, Crystal Structure Of Human Apo-Eif4aiii [Homo sapiens]                             | 15 | 105 |                                      | 1.047 | 0.875 | 0.927 |
| 620876 | SWI/SNF-related matrix-associated actin-dependent regulator of cell growth 1 [Homo sapiens] | 7  | 19  | cell organization and biogenesis     | 0.904 | 0.875 | 0.903 |
| 119610 | arrestin, beta 2, isoform CRA_a [Homo sapiens]                                              | 3  | 7   | n; cellular component movement       | 1.029 | 0.875 | 1.004 |
| 544185 | exosome complex component RRP4 isoform 2 [Homo sapiens]                                     | 4  | 14  | ; regulation of biological process   | 0.965 | 0.875 | 0.834 |
| 166235 | Chain C, Human Neuronal Rab6b In Three Intermediate Forms [Homo sapiens]                    | 5  | 51  | ; response to stimulus; transport    | 1.066 | 0.875 | 0.942 |
| 119577 | seryl-tRNA synthetase 2, isoform CRA_d [Homo sapiens]                                       | 6  | 12  | d biogenesis; metabolic process      | 0.864 | 0.875 | 1.028 |
| 119628 | family with sequence similarity 105, member A, isoform CRA_b [Homo sapiens]                 | 3  | 7   |                                      | 0.996 | 0.874 | 0.808 |
| 194382 | unnamed protein product [Homo sapiens]                                                      | 16 | 77  | metabolic process                    | 1.020 | 0.874 | 0.827 |
| 119581 | ATP citrate lyase, isoform CRA_a [Homo sapiens]                                             | 38 | 372 | ; regulation of biological process   | 1.083 | 0.874 | 0.868 |
| 158255 | unnamed protein product [Homo sapiens]                                                      | 4  | 12  | o stimulus; cellular homeostasis     | 0.861 | 0.874 | 0.832 |
| 180883 | Nitrilase family, member 2 [Homo sapiens]                                                   | 8  | 46  | metabolic process                    | 0.961 | 0.874 | 0.802 |
| 132792 | CHMP7 protein, partial [Homo sapiens]                                                       | 2  | 6   | ization and biogenesis; transport    | 1.098 | 0.874 | 0.833 |
| 560575 | tumor protein D52 isoform 7 [Homo sapiens]                                                  | 3  | 6   | ess; cell differentiation; transport | 0.877 | 0.874 | 0.902 |

|        |                                                                    |    |     |                                     |       |       |       |
|--------|--------------------------------------------------------------------|----|-----|-------------------------------------|-------|-------|-------|
| 119618 | actin related protein 2/3 complex, subunit 3, 21kDa, isoform CRA_  | 3  | 7   | nd biogenesis; defense response     | 0.857 | 0.874 | 0.853 |
| 767968 | PREDICTED: proteasomal ATPase-associated factor 1 isoform X2       | 6  | 12  |                                     | 0.919 | 0.873 | 0.848 |
| 189053 | unnamed protein product [Homo sapiens]                             | 9  | 46  | ic process; response to stimulus    | 1.052 | 0.873 | 0.950 |
| 119613 | phosphoglucomutase 2 [Homo sapiens]                                | 14 | 48  | metabolic process                   | 1.044 | 0.873 | 0.879 |
| 735357 | Chain D, Gdp-Bound Rab2a Gtpase                                    | 11 | 56  | al process; response to stimulus    | 1.074 | 0.872 | 0.918 |
| 161761 | Chain A, Crystal Structure Of The Human Laminin Receptor Precu     | 8  | 116 | metabolic process                   | 0.952 | 0.872 | 0.774 |
| 119611 | cytochrome b5 reductase 1, isoform CRA_a [Homo sapiens]            | 4  | 19  | metabolic process                   | 1.207 | 0.872 | 0.971 |
| 499137 | tropomyosin alpha-3 chain isoform 8 [Homo sapiens]                 | 13 | 168 | cellular component movement         | 1.115 | 0.872 | 0.918 |
| 119615 | karyopherin (importin) beta 1, isoform CRA_b [Homo sapiens]        | 17 | 132 | al process; response to stimulus    | 1.012 | 0.872 | 0.837 |
| 119614 | NADH dehydrogenase (ubiquinone) 1 alpha subcomplex, 4, 9kDa, i     | 4  | 16  | metabolic process; transport        | 1.279 | 0.872 | 0.992 |
| 193786 | unnamed protein product [Homo sapiens]                             | 3  | 5   | al process; response to stimulus    | 1.132 | 0.872 | 0.853 |
| 117356 | golgin-245 [Homo sapiens]                                          | 5  | 12  | ; regulation of biological process  | 0.979 | 0.872 | 0.813 |
| 119606 | phosphofructokinase, platelet, isoform CRA_b [Homo sapiens]        | 12 | 54  | metabolic process                   | 0.994 | 0.871 | 0.858 |
| 289577 | eukaryotic translation initiation factor 4 gamma 2 isoform 2 [Homo | 6  | 11  | cell death; response to stimulus    | 1.157 | 0.871 | 0.985 |
| 767902 | PREDICTED: target of EGR1 protein 1 isoform X3 [Homo sapiens]      | 3  | 5   | metabolic process                   | 1.015 | 0.871 | 0.871 |
| 126527 | Chromosome 22 open reading frame 28 [Homo sapiens]                 | 9  | 34  | metabolic process                   | 0.949 | 0.871 | 0.911 |
| 930588 | dnaJ homolog subfamily A member 1 isoform 2 [Homo sapiens]         | 2  | 3   |                                     | 0.961 | 0.871 | 0.813 |
| 158430 | Chain A, Solution Structure Of Cu(i) Human Sco2                    | 4  | 9   | metabolic process                   | 0.980 | 0.870 | 0.841 |
| 767908 | PREDICTED: ras GTPase-activating-like protein IQGAP3 isoform X     | 2  | 6   | d biogenesis; metabolic process     | 0.760 | 0.870 | 0.905 |
| 119595 | phosphoglucomutase 2-like 1 [Homo sapiens]                         | 4  | 9   | metabolic process                   | 1.117 | 0.870 | 0.969 |
| 291045 | N-acetylserotonin O-methyltransferase-like protein isoform 3 [Hom  | 10 | 38  | metabolic process                   | 0.957 | 0.870 | 0.917 |
| 189054 | unnamed protein product [Homo sapiens]                             | 2  | 5   | cell organization and biogenesis    | 0.974 | 0.870 | 0.885 |
| 208103 | C12orf10 protein [Homo sapiens]                                    | 5  | 25  | response to stimulus                | 1.006 | 0.870 | 0.849 |
| 119599 | Sec61 alpha 1 subunit (S. cerevisiae), isoform CRA_b [Homo sapie   | 7  | 99  | e to stimulus; metabolic process    | 0.921 | 0.870 | 0.880 |
| 119631 | NSFL1 (p97) cofactor (p47), isoform CRA_d [Homo sapiens]           | 8  | 47  | ; regulation of biological process  | 0.967 | 0.869 | 0.847 |
| 857949 | ATP synthase subunit f, mitochondrial isoform 2d [Homo sapiens]    | 2  | 24  | transport; metabolic process        | 1.119 | 0.869 | 0.881 |
| 119581 | transforming growth factor beta regulator 4, isoform CRA_b [Hom    | 7  | 17  | ; regulation of biological process  | 1.020 | 0.869 | 0.965 |
| 578799 | PREDICTED: sodium/potassium-transporting ATPase subunit alph       | 30 | 294 | to stimulus; cell communication     | 1.034 | 0.868 | 0.831 |
| 530411 | PREDICTED: protein HID1 isoform X1 [Homo sapiens]                  | 8  | 39  | transport; response to stimulus     | 0.949 | 0.868 | 1.006 |
| 227611 | unnamed protein product [Homo sapiens]                             | 4  | 9   | n of biological process; transport  | 0.799 | 0.868 | 0.863 |
| 570700 | H/ACA ribonucleoprotein complex subunit 4 isoform 3 [Homo sapi     | 7  | 24  | ; regulation of biological process  | 1.099 | 0.868 | 0.851 |
| 767922 | PREDICTED: serine/threonine-protein phosphatase 6 regulatory ar    | 4  | 6   | cell organization and biogenesis    | 0.997 | 0.867 | 0.879 |
| 375332 | Chain D, Crystal Structure Of Human Pacsin 2 F-Bar                 | 5  | 22  |                                     | 0.990 | 0.867 | 0.911 |
| 158254 | unnamed protein product [Homo sapiens]                             | 20 | 208 | metabolic process; transport        | 0.973 | 0.867 | 0.850 |
| 119601 | aldehyde dehydrogenase 6 family, member A1, isoform CRA_a [Ho      | 10 | 54  | bolic process; cell differentiation | 0.999 | 0.867 | 0.936 |
| 860963 | DNA ligase III [Homo sapiens]                                      | 6  | 24  | f biological process; cell division | 0.960 | 0.867 | 0.902 |
| 120611 | ASC-1 complex subunit P200, partial [Homo sapiens]                 | 14 | 31  | logical process; cell proliferation | 1.029 | 0.867 | 0.876 |
| 767947 | PREDICTED: transducin beta-like protein 2 isoform X2 [Homo sapi    | 10 | 47  | to stimulus; cell communication     | 0.983 | 0.867 | 0.853 |
| 578824 | PREDICTED: disco-interacting protein 2 homolog B isoform X7 [H     | 9  | 22  | metabolic process                   | 0.939 | 0.867 | 0.811 |
| 119595 | carnitine palmitoyltransferase 1A (liver), isoform CRA_a [Homo sa  | 25 | 146 | cell organization and biogenesis    | 1.048 | 0.866 | 0.795 |

|        |                                                                                           |    |     |                                                              |       |       |       |
|--------|-------------------------------------------------------------------------------------------|----|-----|--------------------------------------------------------------|-------|-------|-------|
| 227603 | unnamed protein product [Homo sapiens]                                                    | 9  | 23  | cell organization and biogenesis                             | 0.950 | 0.866 | 0.915 |
| 127116 | CGI-201 protein, short form [Homo sapiens]                                                | 8  | 21  | regulation of biological process                             | 1.067 | 0.866 | 0.848 |
| 767983 | PREDICTED: vacuolar protein sorting-associated protein 33B isoform X1 [Homo sapiens]      | 4  | 9   | regulation of biological process                             | 1.155 | 0.866 | 0.844 |
| 551701 | Chain D, Structure Of Recombinant Human Cytochrome C                                      | 5  | 24  |                                                              | 0.964 | 0.866 | 0.825 |
| 767918 | PREDICTED: protein phosphatase 1 regulatory subunit 7 isoform X1 [Homo sapiens]           | 4  | 11  | regulation of biological process                             | 1.025 | 0.865 | 0.813 |
| 110669 | EH domain-containing protein FKSG7 [Homo sapiens]                                         | 8  | 21  | biogenesis; response to stimulus                             | 1.031 | 0.865 | 0.849 |
| 408896 | Chain H, Appbp1-Uba3-Nedd8, An E1-Ubiquitin-Like Protein Complex [Homo sapiens]           | 5  | 22  | metabolic process                                            | 1.025 | 0.865 | 0.905 |
| 767923 | PREDICTED: solute carrier family 25 member 38 isoform X4 [Homo sapiens]                   | 2  | 3   | cellular component movement; transport; cell differentiation | 0.802 | 0.865 | 0.928 |
| 283724 | kinase/transmembrane domain fusion protein, partial [Homo sapiens]                        | 2  | 2   | metabolic process                                            | 0.824 | 0.865 | 0.881 |
| 578804 | PREDICTED: integrin alpha-V isoform X1 [Homo sapiens]                                     | 6  | 12  | cellular component movement; transport; metabolic process    | 0.877 | 0.864 | 0.829 |
| 400413 | unnamed protein product, partial [Homo sapiens]                                           | 4  | 17  |                                                              | 1.082 | 0.864 | 0.915 |
| 119617 | keratin 2A (epidermal ichthyosis bullosa of Siemens) [Homo sapiens]                       | 32 | 249 | cellular component movement                                  | 0.918 | 0.864 | 1.399 |
| 119617 | keratin 6E, isoform CRA_b [Homo sapiens]                                                  | 25 | 205 | cell organization and biogenesis                             | 1.010 | 0.864 | 1.082 |
| 189053 | unnamed protein product [Homo sapiens]                                                    | 8  | 49  | cellular proliferation; cellular homeostasis                 | 1.021 | 0.864 | 0.885 |
| 194379 | unnamed protein product [Homo sapiens]                                                    | 2  | 4   | cellular process; response to stimulus                       | 0.987 | 0.864 | 0.880 |
| 119619 | cytochrome c oxidase subunit Va, isoform CRA_b [Homo sapiens]                             | 3  | 47  | metabolic process; transport                                 | 0.928 | 0.864 | 0.819 |
| 119610 | progesterone receptor membrane component 1, isoform CRA_b [Homo sapiens]                  | 7  | 61  | cellular component movement                                  | 1.006 | 0.864 | 0.867 |
| 194387 | unnamed protein product [Homo sapiens]                                                    | 25 | 203 | cell organization and biogenesis                             | 1.010 | 0.863 | 1.081 |
| 403072 | Chain E, Espg-Rab1-Arf6 Complex                                                           | 11 | 101 |                                                              | 1.233 | 0.863 | 0.881 |
| 194383 | unnamed protein product [Homo sapiens]                                                    | 5  | 23  | regulation of biological process                             | 0.880 | 0.863 | 0.864 |
| 530375 | PREDICTED: selenocysteine-specific elongation factor isoform X4 [Homo sapiens]            | 7  | 21  | regulation of biological process                             | 0.913 | 0.862 | 0.923 |
| 194382 | unnamed protein product [Homo sapiens]                                                    | 11 | 62  | metabolic process                                            | 0.960 | 0.862 | 0.897 |
| 104340 | unnamed protein product, partial [Homo sapiens]                                           | 4  | 7   | cellular biogenesis; metabolic process                       | 0.962 | 0.862 | 0.825 |
| 119597 | hCG2023776 [Homo sapiens]                                                                 | 6  | 47  | metabolic process                                            | 1.134 | 0.862 | 1.120 |
| 119577 | small nuclear ribonucleoprotein polypeptide A, isoform CRA_a [Homo sapiens]               | 6  | 27  | metabolic process                                            | 0.844 | 0.862 | 0.923 |
| 189055 | unnamed protein product [Homo sapiens]                                                    | 4  | 12  | cellular proliferation; coagulation; transport               | 0.950 | 0.862 | 0.784 |
| 119581 | keratin 10 (epidermolytic hyperkeratosis; keratosis palmaris et plantaris) [Homo sapiens] | 28 | 294 | cellular differentiation; response to stimulus               | 0.895 | 0.861 | 1.707 |
| 119580 | F-box protein 7, isoform CRA_b, partial [Homo sapiens]                                    | 2  | 4   | regulation of biological process                             | 1.039 | 0.861 | 0.908 |
| 387528 | alanine-tRNA editing protein Aarsd1 [Homo sapiens]                                        | 5  | 19  | regulation of biological process                             | 1.011 | 0.861 | 0.908 |
| 146134 | NAD kinase 2, mitochondrial isoform 1 [Homo sapiens]                                      | 6  | 23  | cellular process; response to stimulus                       | 1.150 | 0.861 | 0.919 |
| 119605 | DnaJ (Hsp40) homolog, subfamily A, member 3, isoform CRA_a, partial [Homo sapiens]        | 4  | 14  | cellular biogenesis; cell differentiation                    | 0.980 | 0.861 | 0.891 |
| 119570 | membrane interacting protein of RGS16, isoform CRA_c [Homo sapiens]                       | 2  | 4   | metabolic process                                            | 0.900 | 0.861 | 0.892 |
| 484254 | Chain D, Crystal Structure Of Isobutyryl-Coa Dehydrogenase Complex [Homo sapiens]         | 6  | 11  | metabolic process                                            | 1.155 | 0.861 | 0.899 |
| 120346 | ribeye [Homo sapiens]                                                                     | 9  | 35  | metabolic process; cell differentiation                      | 1.097 | 0.860 | 0.886 |
| 126031 | Chain H, Crystal Structure Of Human Ctbp2 Dehydrogenase Complex [Homo sapiens]            | 9  | 35  | metabolic process                                            | 1.076 | 0.860 | 0.882 |
| 144956 | WDR77 protein [Homo sapiens]                                                              | 2  | 11  | metabolic process; cell differentiation                      | 0.961 | 0.859 | 0.799 |
| 194380 | unnamed protein product [Homo sapiens]                                                    | 5  | 13  | response to stimulus; transport                              | 0.809 | 0.859 | 0.913 |
| 189055 | unnamed protein product [Homo sapiens]                                                    | 2  | 10  | cellular biogenesis; metabolic process                       | 0.827 | 0.859 | 0.889 |
| 450335 | DNA (cytosine-5)-methyltransferase 1 isoform b [Homo sapiens]                             | 10 | 33  | biogenesis; response to stimulus                             | 0.954 | 0.859 | 0.867 |
| 181402 | epidermal cytokeratin 2 [Homo sapiens]                                                    | 32 | 245 | cellular component movement                                  | 0.911 | 0.859 | 1.384 |

|        |                                                                                       |    |     |                                               |       |       |       |
|--------|---------------------------------------------------------------------------------------|----|-----|-----------------------------------------------|-------|-------|-------|
| 186055 | PMPCA protein, partial [Homo sapiens]                                                 | 8  | 14  | metabolic process; transport                  | 1.041 | 0.859 | 0.884 |
| 402868 | wasp-interacting SH3 protein isoform B [Homo sapiens]                                 | 3  | 5   | response to stimulus; defense response        | 0.848 | 0.859 | 0.789 |
| 119590 | ATP-binding cassette, sub-family B (MDR/TAP), member 10 [Homo sapiens]                | 10 | 24  | metabolic process; transport                  | 1.007 | 0.859 | 0.832 |
| 767937 | PREDICTED: probable histidine--tRNA ligase, mitochondrial isoform 1 [Homo sapiens]    | 5  | 27  | cell organization and biogenesis              | 0.936 | 0.859 | 0.879 |
| 119627 | cytidylate kinase, isoform CRA_b [Homo sapiens]                                       | 2  | 5   | metabolic process                             | 0.879 | 0.859 | 0.906 |
| 100933 | RanBP2 (Ran-binding protein 2) [Homo sapiens]                                         | 16 | 33  | regulation of biological process              | 0.968 | 0.858 | 0.869 |
| 377824 | LP6054 [Homo sapiens]                                                                 | 2  | 3   |                                               | 1.139 | 0.858 | 0.827 |
| 119628 | heat shock 105kDa/110kDa protein 1, isoform CRA_a [Homo sapiens]                      | 11 | 35  | regulation of biological process              | 0.998 | 0.858 | 0.848 |
| 119586 | chromosome 14 open reading frame 166, isoform CRA_b [Homo sapiens]                    | 4  | 19  | regulation of biological process; transport   | 1.057 | 0.858 | 0.741 |
| 578825 | PREDICTED: kinectin isoform X6 [Homo sapiens]                                         | 9  | 33  | cellular process; response to stimulus        | 0.891 | 0.858 | 0.909 |
| 119602 | mannosidase, alpha, class 2B, member 2, isoform CRA_b [Homo sapiens]                  | 3  | 4   | metabolic process                             | 0.744 | 0.858 | 0.859 |
| 725334 | Apolipoprotein A-I binding protein [Homo sapiens]                                     | 4  | 16  | cell organization and biogenesis              | 1.091 | 0.858 | 0.955 |
| 119595 | hCG27673, isoform CRA_b, partial [Homo sapiens]                                       | 2  | 4   | metabolic process                             | 1.111 | 0.857 | 0.719 |
| 509596 | TARSL2 protein, partial [Homo sapiens]                                                | 2  | 6   | metabolic process                             | 1.065 | 0.857 | 0.960 |
| 576583 | dihydrolipoyl dehydrogenase, mitochondrial isoform 2 [Homo sapiens]                   | 9  | 43  | cellular process; cellular homeostasis        | 1.117 | 0.857 | 0.846 |
| 119621 | tumor suppressing subtransferable candidate 1, isoform CRA_a [Homo sapiens]           | 6  | 15  |                                               | 0.963 | 0.857 | 0.891 |
| 221041 | unnamed protein product [Homo sapiens]                                                | 3  | 7   | cell organization and biogenesis              | 0.913 | 0.857 | 0.871 |
| 102573 | serine protease TADG15 [Homo sapiens]                                                 | 3  | 5   | metabolic process; cell differentiation       | 0.745 | 0.856 | 0.865 |
| 119587 | SID1 transmembrane family, member 2, isoform CRA_c [Homo sapiens]                     | 2  | 3   | regulation of biological process              | 0.823 | 0.856 | 0.852 |
| 224036 | Chain F, Crystal Structure Of The Eif4a-Pdcd4 Complex                                 | 22 | 213 | metabolic process                             | 1.104 | 0.856 | 0.874 |
| 270288 | NADH dehydrogenase [ubiquinone] 1 beta subcomplex subunit 4 isoform 1 [Homo sapiens]  | 3  | 14  | cellular process; response to stimulus        | 1.038 | 0.855 | 0.879 |
| 194379 | unnamed protein product [Homo sapiens]                                                | 7  | 23  | cell proliferation; defense response          | 0.944 | 0.855 | 0.910 |
| 530397 | PREDICTED: phosphatidylinositol-binding clathrin assembly protein [Homo sapiens]      | 5  | 17  | cellular process; metabolic process           | 1.085 | 0.855 | 0.875 |
| 530402 | PREDICTED: exportin-4 isoform X2 [Homo sapiens]                                       | 4  | 5   | regulation of biological process              | 0.795 | 0.855 | 0.829 |
| 119617 | keratin 1 (epidermolytic hyperkeratosis) [Homo sapiens]                               | 32 | 383 | response to stimulus; transport               | 1.003 | 0.855 | 1.649 |
| 194390 | unnamed protein product [Homo sapiens]                                                | 11 | 30  |                                               | 0.944 | 0.855 | 0.827 |
| 227488 | carnosine N-methyltransferase [Homo sapiens]                                          | 2  | 3   | metabolic process                             | 0.935 | 0.855 | 0.865 |
| 158260 | unnamed protein product [Homo sapiens]                                                | 8  | 51  | regulation of biological process              | 0.958 | 0.854 | 0.779 |
| 126468 | unnamed protein product [Homo sapiens]                                                | 26 | 142 |                                               | 1.160 | 0.854 | 0.890 |
| 189053 | unnamed protein product [Homo sapiens]                                                | 3  | 5   | metabolic process; transport                  | 0.898 | 0.854 | 0.823 |
| 119553 | type I keratin 16 [Homo sapiens]                                                      | 16 | 134 | cellular process; cellular component movement | 1.079 | 0.854 | 0.913 |
| 189053 | unnamed protein product [Homo sapiens]                                                | 5  | 30  | cellular process; transport                   | 1.030 | 0.854 | 0.924 |
| 119575 | kinesin family member 13A, isoform CRA_c [Homo sapiens]                               | 2  | 3   | cell organization and biogenesis              | 1.253 | 0.853 | 0.756 |
| 158259 | unnamed protein product [Homo sapiens]                                                | 5  | 25  | response to stimulus; cell communication      | 1.137 | 0.853 | 0.879 |
| 480312 | Chain A, Structure Of The Npp2ac-alpha4 Complex                                       | 2  | 2   |                                               | 1.002 | 0.853 | 0.852 |
| 208096 | PIGO protein, partial [Homo sapiens]                                                  | 2  | 4   | metabolic process                             | 0.931 | 0.853 | 0.879 |
| 278088 | Chain N, Proteasome Activator Reg(Alpha)                                              | 6  | 19  |                                               | 1.065 | 0.853 | 0.848 |
| 119601 | eukaryotic translation initiation factor 2B, subunit 2 beta, 39kDa [Homo sapiens]     | 5  | 8   | cellular process; response to stimulus        | 0.915 | 0.852 | 0.753 |
| 119598 | replication factor C (activator 1) 4, 37kDa, isoform CRA_b [Homo sapiens]             | 4  | 12  | response to stimulus; cellular homeostasis    | 1.117 | 0.852 | 0.956 |
| 119612 | eukaryotic translation initiation factor 3, subunit 6 48kDa, isoform 1 [Homo sapiens] | 9  | 43  | regulation of biological process              | 1.102 | 0.852 | 0.891 |



|        |                                                                                                       |    |     |                                     |       |       |       |
|--------|-------------------------------------------------------------------------------------------------------|----|-----|-------------------------------------|-------|-------|-------|
| 194374 | unnamed protein product [Homo sapiens]                                                                | 3  | 4   | us; cell proliferation; cell growth | 0.885 | 0.852 | 0.838 |
| 119617 | chaperonin containing TCP1, subunit 2 (beta), isoform CRA_b [Homo sapiens]                            | 14 | 188 | zation and biogenesis; transport    | 1.070 | 0.852 | 0.854 |
| 194374 | unnamed protein product [Homo sapiens]                                                                | 3  | 16  | cell organization and biogenesis    | 0.851 | 0.851 | 0.773 |
| 217392 | hypothetical protein, partial [Homo sapiens]                                                          | 3  | 5   | rt; cellular component movement     | 1.004 | 0.851 | 0.923 |
| 345277 | unnamed protein product [Homo sapiens]                                                                | 2  | 4   |                                     | 0.940 | 0.851 | 0.933 |
| 126534 | Proteasome (prosome, macropain) subunit, beta type, 1 [Homo sapiens]                                  | 8  | 65  | ent movement; defense response      | 0.976 | 0.850 | 0.893 |
| 767961 | PREDICTED: erlin-1 isoform X3 [Homo sapiens]                                                          | 3  | 22  | al process; response to stimulus    | 1.155 | 0.850 | 0.854 |
| 345277 | unnamed protein product [Homo sapiens]                                                                | 2  | 3   | regulation of biological process    | 0.889 | 0.850 | 0.848 |
| 532164 | vacuolar protein-sorting-associated protein 36 isoform 3 [Homo sapiens]                               | 2  | 3   | cell organization and biogenesis    | 0.976 | 0.850 | 0.894 |
| 261882 | CEV14, partial [Homo sapiens]                                                                         | 2  | 4   | ; regulation of biological process  | 0.904 | 0.849 | 0.853 |
| 530424 | PREDICTED: myosin regulatory light chain 12A isoform X1 [Homo sapiens]                                | 5  | 46  | zation and biogenesis; transport    | 1.046 | 0.849 | 0.976 |
| 119604 | hCG2002486, isoform CRA_b [Homo sapiens]                                                              | 2  | 6   | nse response; metabolic process     | 0.909 | 0.849 | 0.912 |
| 318739 | hypothetical protein, partial [Homo sapiens]                                                          | 6  | 15  | ; coagulation; defense response     | 0.982 | 0.849 | 0.859 |
| 119610 | hCG42028, isoform CRA_a [Homo sapiens]                                                                | 3  | 5   |                                     | 0.889 | 0.849 | 0.904 |
| 415814 | formin-binding protein 1-like isoform 2 [Homo sapiens]                                                | 3  | 7   | ; regulation of biological process  | 1.120 | 0.849 | 0.874 |
| 119619 | hypothetical protein LOC51255, isoform CRA_b [Homo sapiens]                                           | 3  | 6   | metabolic process                   | 0.759 | 0.849 | 0.844 |
| 119625 | steroid 5 alpha-reductase 2-like [Homo sapiens]                                                       | 2  | 3   | metabolic process                   | 1.019 | 0.848 | 0.789 |
| 182790 | alpha-L fucosidase, partial [Homo sapiens]                                                            | 6  | 17  | metabolic process                   | 1.045 | 0.848 | 0.982 |
| 217399 | hypothetical protein, partial [Homo sapiens]                                                          | 2  | 3   | ; regulation of biological process  | 0.725 | 0.848 | 0.786 |
| 349587 | Chain D, Crystal Structure Of Full-Length Human Peroxiredoxin 4 [Homo sapiens]                        | 7  | 70  | metabolic process                   | 0.994 | 0.848 | 0.936 |
| 382571 | very-long-chain (3R)-3-hydroxyacyl-CoA dehydratase 2 [Homo sapiens]                                   | 2  | 7   | metabolic process                   | 0.828 | 0.848 | 0.769 |
| 119570 | membrane-associated ring finger (C3HC4) 5, isoform CRA_c [Homo sapiens]                               | 2  | 4   | ; regulation of biological process  | 1.169 | 0.847 | 0.988 |
| 756142 | Chain 3, Human Constitutive 20s Proteasome In Complex With Carboxyl-terminal Threonine [Homo sapiens] | 13 | 84  |                                     | 1.040 | 0.847 | 0.835 |
| 767932 | PREDICTED: N-acetylgalactosaminyltransferase 7 isoform X2 [Homo sapiens]                              | 6  | 10  | metabolic process                   | 0.821 | 0.846 | 0.838 |
| 119632 | RAB3 GTPase activating protein subunit 1 (catalytic), isoform CRA_b [Homo sapiens]                    | 2  | 5   | biogenesis; response to stimulus    | 1.052 | 0.846 | 0.761 |
| 119604 | deoxyhypusine synthase, isoform CRA_a [Homo sapiens]                                                  | 3  | 11  | cell organization and biogenesis    | 1.141 | 0.846 | 0.893 |
| 767992 | PREDICTED: phosphoribosyl pyrophosphate synthase-associated protein 1 [Homo sapiens]                  | 7  | 27  | ; regulation of biological process  | 1.040 | 0.846 | 0.895 |
| 767917 | PREDICTED: vigilin isoform X2 [Homo sapiens]                                                          | 12 | 39  | transport; metabolic process        | 0.977 | 0.846 | 0.847 |
| 28880  | acid sphingomyelinase (502 AA), partial [Homo sapiens]                                                | 3  | 8   | al process; response to stimulus    | 1.007 | 0.845 | 0.785 |
| 767961 | PREDICTED: sideroflexin-2 isoform X1 [Homo sapiens]                                                   | 3  | 11  | transport                           | 0.937 | 0.845 | 0.905 |
| 767981 | PREDICTED: histone-lysine N-methyltransferase setd3 isoform X5 [Homo sapiens]                         | 5  | 12  | ; regulation of biological process  | 1.119 | 0.845 | 0.828 |
| 829581 | Chain B, Crystal Structure Of Cladosporin In Complex With Humaric Acid [Homo sapiens]                 | 8  | 23  |                                     | 1.077 | 0.845 | 0.927 |
| 119613 | melanoma antigen family D, 2, isoform CRA_e [Homo sapiens]                                            | 13 | 31  |                                     | 1.140 | 0.845 | 0.925 |
| 119625 | phosphoribosylaminoimidazole carboxylase, phosphoribosylaminimidazole carboxylase [Homo sapiens]      | 12 | 45  | metabolic process                   | 1.057 | 0.845 | 0.850 |
| 119604 | IMP (inosine monophosphate) dehydrogenase 1, isoform CRA_c [Homo sapiens]                             | 3  | 9   | nse to stimulus; cell proliferation | 0.904 | 0.844 | 0.797 |
| 488445 | hypothetical protein, partial [Homo sapiens]                                                          | 2  | 3   | transport                           | 0.680 | 0.844 | 0.769 |
| 828806 | ubiquitin carboxyl-terminal hydrolase 14 isoform b [Homo sapiens]                                     | 9  | 78  | ; regulation of biological process  | 0.931 | 0.844 | 0.876 |
| 767915 | PREDICTED: exportin-1 isoform X3 [Homo sapiens]                                                       | 15 | 53  | e to stimulus; metabolic process    | 0.940 | 0.843 | 0.863 |
| 667484 | Chain A, Structure Of The Sortilin:neurotensin Complex At Excess [Homo sapiens]                       | 4  | 8   |                                     | 1.034 | 0.843 | 0.967 |
| 929654 | KIAA1792 protein [Homo sapiens]                                                                       | 2  | 2   |                                     | 0.960 | 0.842 | 0.815 |

|        |                                                                      |    |     |                                       |       |       |       |
|--------|----------------------------------------------------------------------|----|-----|---------------------------------------|-------|-------|-------|
| 780703 | CDC2 protein [Homo sapiens]                                          | 4  | 19  | ; cell differentiation; cell division | 0.935 | 0.842 | 0.846 |
| 442570 | Chain J, Crystal Structure Of Human Rab1b Bound To Gdp And Be        | 12 | 107 | al process; response to stimulus      | 1.229 | 0.841 | 0.897 |
| 197116 | 5'-nucleotidase domain-containing protein 2 isoform 1 [Homo sapiens] | 12 | 70  | metabolic process                     | 1.037 | 0.841 | 0.810 |
| 119579 | hCG1748768, isoform CRA_b, partial [Homo sapiens]                    | 9  | 102 |                                       | 1.217 | 0.841 | 0.870 |
| 119577 | hypothetical protein FLJ20512 [Homo sapiens]                         | 2  | 13  |                                       | 1.007 | 0.841 | 0.918 |
| 767964 | PREDICTED: golgi-specific brefeldin A-resistance guanine nucleot     | 9  | 26  | e to stimulus; metabolic process      | 0.953 | 0.841 | 0.851 |
| 318733 | hypothetical protein [Homo sapiens]                                  | 11 | 28  | ; regulation of biological process    | 0.913 | 0.841 | 0.770 |
| 320461 | adenosine kinase isoform c [Homo sapiens]                            | 4  | 12  | metabolic process                     | 0.855 | 0.840 | 0.923 |
| 548923 | U3 small nucleolar RNA-associated protein 15 homolog isoform 2       | 2  | 4   | ; regulation of biological process    | 0.897 | 0.840 | 0.886 |
| 194383 | unnamed protein product [Homo sapiens]                               | 3  | 7   | cell organization and biogenesis      | 1.145 | 0.840 | 0.832 |
| 179832 | calnexin [Homo sapiens]                                              | 7  | 26  | metabolic process; transport          | 1.554 | 0.840 | 0.969 |
| 213361 | unnamed protein product [Homo sapiens]                               | 3  | 6   |                                       | 0.815 | 0.840 | 0.904 |
| 385252 | Chain A, Rsk2 C-Terminal Kinase Domain With Inhibitor (E)-Methyl     | 2  | 5   | metabolic process                     | 0.854 | 0.840 | 0.757 |
| 158624 | unnamed protein product [Homo sapiens]                               | 4  | 9   |                                       | 1.230 | 0.839 | 0.821 |
| 167745 | Chain A, Structural Basis For Substrate Fatty-Acyl Chain Specificit  | 18 | 60  | metabolic process                     | 1.070 | 0.839 | 0.891 |
| 509494 | hypothetical protein, partial [Homo sapiens]                         | 4  | 15  | metabolic process                     | 0.928 | 0.839 | 0.833 |
| 145337 | LONP1 protein, partial [Homo sapiens]                                | 5  | 28  | e to stimulus; metabolic process      | 0.934 | 0.839 | 0.871 |
| 530365 | PREDICTED: probable ATP-dependent RNA helicase DDX59 isoform         | 3  | 5   | metabolic process                     | 0.939 | 0.839 | 0.795 |
| 193785 | unnamed protein product [Homo sapiens]                               | 2  | 12  | gical process; metabolic process      | 1.068 | 0.839 | 0.900 |
| 767930 | PREDICTED: signal recognition particle subunit SRP72 isoform X1      | 8  | 30  | ; transport; response to stimulus     | 1.065 | 0.839 | 0.914 |
| 530364 | PREDICTED: dual specificity protein phosphatase 23 isoform X1 [H     | 5  | 21  | metabolic process                     | 1.099 | 0.838 | 0.796 |
| 300388 | 26S proteasome non-ATPase regulatory subunit 1 isoform 2 [Homo       | 15 | 67  | ent movement; defense response        | 1.085 | 0.838 | 0.911 |
| 194387 | unnamed protein product [Homo sapiens]                               | 9  | 57  | ; regulation of biological process    | 0.976 | 0.838 | 0.844 |
| 767970 | PREDICTED: heat shock cognate 71 kDa protein isoform X1 [Homo        | 25 | 661 | n; cellular component movement        | 1.189 | 0.838 | 0.866 |
| 194378 | unnamed protein product [Homo sapiens]                               | 9  | 30  | metabolic process                     | 1.102 | 0.838 | 0.892 |
| 578801 | PREDICTED: tropomyosin alpha-3 chain isoform X3 [Homo sapiens]       | 13 | 76  | cellular component movement           | 1.237 | 0.838 | 0.918 |
| 400415 | unnamed protein product, partial [Homo sapiens]                      | 4  | 78  |                                       | 0.910 | 0.838 | 0.936 |
| 728797 | epithelial splicing regulatory protein 2 [Homo sapiens]              | 7  | 23  | ; regulation of biological process    | 0.883 | 0.837 | 0.848 |
| 119587 | copine VII, isoform CRA_b [Homo sapiens]                             | 2  | 15  | ; transport; response to stimulus     | 0.942 | 0.837 | 0.796 |
| 312032 | aminoacylase-1 isoform d [Homo sapiens]                              | 4  | 7   | metabolic process                     | 0.825 | 0.837 | 0.773 |
| 530410 | PREDICTED: COP9 signalosome complex subunit 3 isoform X1 [H          | 5  | 8   | ; regulation of biological process    | 1.277 | 0.837 | 0.870 |
| 253722 | Chain B, Human Platelet Profilin Complexed With The L-Pro10 Pep      | 8  | 290 | cell organization and biogenesis      | 1.236 | 0.836 | 0.835 |
| 194379 | unnamed protein product [Homo sapiens]                               | 16 | 87  | al process; response to stimulus      | 1.125 | 0.836 | 0.846 |
| 133778 | LOC728395 protein [Homo sapiens]                                     | 3  | 11  | l proliferation; cell differentiation | 0.866 | 0.836 | 0.854 |
| 189053 | unnamed protein product [Homo sapiens]                               | 10 | 55  | se to stimulus; defense response      | 0.991 | 0.836 | 0.865 |
| 124481 | PCM1 protein [Homo sapiens]                                          | 4  | 10  | ; regulation of biological process    | 1.021 | 0.835 | 0.925 |
| 158256 | unnamed protein product [Homo sapiens]                               | 8  | 31  | metabolic process                     | 0.993 | 0.835 | 0.786 |
| 545688 | GMP reductase 2 isoform 5 [Homo sapiens]                             | 4  | 11  | metabolic process                     | 0.914 | 0.835 | 0.774 |
| 468067 | CGI-20 protein [Homo sapiens]                                        | 5  | 13  | ; regulation of biological process    | 1.040 | 0.835 | 0.855 |
| 347863 | delta-adaptin, partial CDS, partial [Homo sapiens]                   | 7  | 16  | ; regulation of biological process    | 0.961 | 0.835 | 0.808 |

|        |                                                                     |    |     |                                     |       |       |       |
|--------|---------------------------------------------------------------------|----|-----|-------------------------------------|-------|-------|-------|
| 159163 | Chain A, The Solution Structure Of The Thioredoxin-Like Domain C    | 2  | 14  | regulation of biological process    | 1.086 | 0.835 | 0.911 |
| 357380 | Chain D, Gef Domain Of Dennd 1b In Complex With Rab Gtpase Ra       | 5  | 61  | al process; response to stimulus    | 1.153 | 0.834 | 0.839 |
| 101532 | alanyl-tRNA synthetase [Homo sapiens]                               | 19 | 114 | al process; response to stimulus    | 1.162 | 0.834 | 0.908 |
| 189054 | unnamed protein product [Homo sapiens]                              | 18 | 78  | ic process; response to stimulus    | 1.017 | 0.833 | 0.859 |
| 119599 | DnaJ (Hsp40) homolog, subfamily C, member 13, isoform CRA_a [       | 2  | 3   | ; regulation of biological process  | 1.282 | 0.833 | 0.858 |
| 768039 | PREDICTED: inositol polyphosphate 5-phosphatase OCRL-1 isofo        | 4  | 9   | cell organization and biogenesis    | 0.859 | 0.833 | 0.880 |
| 800909 | low density lipoprotein receptor, partial [Homo sapiens]            | 2  | 5   | al process; response to stimulus    | 0.894 | 0.833 | 0.775 |
| 158260 | unnamed protein product [Homo sapiens]                              | 4  | 23  | gical process; metabolic process    | 0.985 | 0.833 | 1.004 |
| 551405 | protein arginine methyltransferase 1 isoform 4 [Homo sapiens]       | 8  | 37  | ic process; response to stimulus    | 1.181 | 0.833 | 0.933 |
| 119618 | GCN1 general control of amino-acid synthesis 1-like 1 (yeast), isof | 20 | 37  | unication; response to stimulus     | 0.965 | 0.833 | 0.831 |
| 119581 | signal transducer and activator of transcription 3 (acute-phase res | 6  | 14  | cell organization and biogenesis    | 1.060 | 0.832 | 0.841 |
| 119618 | proteasome (prosome, macropain) 26S subunit, non-ATPase, 9, is      | 2  | 11  | cell organization and biogenesis    | 1.222 | 0.832 | 0.852 |
| 193787 | unnamed protein product [Homo sapiens]                              | 6  | 10  | transport                           | 1.135 | 0.831 | 0.848 |
| 767950 | PREDICTED: myotubularin-related protein 9 isoform X2 [Homo sap      | 2  | 5   | regulation of biological process    | 0.905 | 0.831 | 0.766 |
| 296802 | AGTRAP-BRAF fusion protein [Homo sapiens]                           | 6  | 21  | metabolic process                   | 1.107 | 0.831 | 0.821 |
| 227448 | phosphofructokinase                                                 | 12 | 54  | metabolic process                   | 1.022 | 0.830 | 0.811 |
| 137868 | Chain B, Human Heart L-lactate Dehydrogenase H Chain, Ternary C     | 8  | 107 | metabolic process                   | 0.955 | 0.830 | 0.718 |
| 578823 | PREDICTED: V-type proton ATPase 116 kDa subunit a isoform 2 is      | 3  | 5   | cell organization and biogenesis    | 0.940 | 0.830 | 0.844 |
| 530372 | PREDICTED: filamin-B isoform X2 [Homo sapiens]                      | 74 | 348 | al process; response to stimulus    | 0.980 | 0.830 | 0.845 |
| 115527 | PEX11A protein [Homo sapiens]                                       | 3  | 5   | bolic process; cell differentiation | 0.971 | 0.829 | 0.766 |
| 572153 | Chain N, Crystal Structure Of The Vif-cfbeta-cul5-elob-eloc Penta   | 3  | 7   |                                     | 1.282 | 0.829 | 0.860 |
| 482571 | GLRX3 protein, partial [Homo sapiens]                               | 3  | 9   | homeostasis; metabolic process      | 0.901 | 0.829 | 0.847 |
| 119578 | ELAV (embryonic lethal, abnormal vision, Drosophila)-like 2 (Hu ar  | 2  | 23  | regulation of biological process    | 0.850 | 0.828 | 0.856 |
| 111305 | Valosin-containing protein [Homo sapiens]                           | 23 | 236 | cell organization and biogenesis    | 1.057 | 0.828 | 0.877 |
| 833183 | CLCN7 protein, partial [Homo sapiens]                               | 2  | 4   | e to stimulus; metabolic process    | 0.936 | 0.828 | 0.826 |
| 618855 | Chain A, Structural Basis Of Soss1 Complex Assembly                 | 5  | 7   |                                     | 1.073 | 0.827 | 0.974 |
| 221040 | unnamed protein product [Homo sapiens]                              | 3  | 79  | metabolic process                   | 1.154 | 0.827 | 0.944 |
| 469039 | nuclear factor 1 B-type, partial [Homo sapiens]                     | 2  | 20  | s; cellular component movement      | 1.087 | 0.827 | 0.965 |
| 768037 | PREDICTED: protein YIPF6 isoform X2 [Homo sapiens]                  | 3  | 12  |                                     | 1.174 | 0.827 | 0.918 |
| 616804 | Chain B, Crystal Structure Of The Hspbp1 Core Domain Complex        | 6  | 17  |                                     | 1.298 | 0.826 | 0.805 |
| 142905 | TIMM50 protein, partial [Homo sapiens]                              | 5  | 14  | sis; metabolic process; transport   | 1.257 | 0.826 | 0.958 |
| 179969 | CCAAT-box-binding factor [Homo sapiens]                             | 3  | 5   | ; regulation of biological process  | 1.125 | 0.826 | 0.924 |
| 898864 | TBC1 domain family member 24 isoform 2 [Homo sapiens]               | 4  | 10  | ; regulation of biological process  | 1.242 | 0.826 | 0.886 |
| 189053 | unnamed protein product [Homo sapiens]                              | 8  | 47  | metabolic process                   | 1.094 | 0.826 | 0.874 |
| 194381 | unnamed protein product [Homo sapiens]                              | 3  | 7   | cell organization and biogenesis    | 1.083 | 0.825 | 0.833 |
| 375889 | FARSB protein, partial [Homo sapiens]                               | 7  | 22  | metabolic process                   | 1.001 | 0.825 | 0.867 |
| 305827 | dihydropyrimidinase-like 2 [Homo sapiens]                           | 3  | 10  | ; regulation of biological process  | 0.829 | 0.825 | 0.744 |
| 119627 | nuclear factor I/A, isoform CRA_a [Homo sapiens]                    | 2  | 19  | cell organization and biogenesis    | 1.034 | 0.825 | 0.987 |
| 225735 | disco-interacting protein 2 homolog A isoform f [Homo sapiens]      | 2  | 6   | ; regulation of biological process  | 1.009 | 0.825 | 0.828 |
| 193785 | unnamed protein product [Homo sapiens]                              | 2  | 3   |                                     | 1.048 | 0.824 | 0.850 |

|        |                                                                     |    |     |                                      |       |       |       |
|--------|---------------------------------------------------------------------|----|-----|--------------------------------------|-------|-------|-------|
| 119577 | small nuclear ribonucleoprotein D2 polypeptide 16.5kDa, isoform C   | 2  | 8   | d biogenesis; metabolic process      | 0.997 | 0.824 | 0.995 |
| 119569 | WD repeat domain 36, isoform CRA_b [Homo sapiens]                   | 11 | 32  | al process; response to stimulus     | 0.940 | 0.824 | 0.899 |
| 119592 | KIAA2013, isoform CRA_a [Homo sapiens]                              | 6  | 14  |                                      | 0.803 | 0.824 | 0.796 |
| 277348 | deleted in autism protein 1 isoform a precursor [Homo sapiens]      | 3  | 7   | logical process; cell proliferation  | 0.910 | 0.824 | 0.724 |
| 889461 | KIAA0851 protein, partial [Homo sapiens]                            | 10 | 37  | metabolic process                    | 0.919 | 0.823 | 0.830 |
| 628223 | unknown, partial [Homo sapiens]                                     | 3  | 5   | al process; response to stimulus     | 0.832 | 0.823 | 0.866 |
| 119590 | CDC42 binding protein kinase alpha (DMPK-like), isoform CRA_d [     | 3  | 3   | al process; response to stimulus     | 0.919 | 0.823 | 0.872 |
| 216185 | EEF2K protein [Homo sapiens]                                        | 2  | 6   | al process; response to stimulus     | 0.722 | 0.823 | 0.767 |
| 186557 | Chain F, Crystal Structure Of The Adenylyl Cyclase Domain Of Ant    | 5  | 130 |                                      | 1.098 | 0.823 | 0.870 |
| 156209 | KIAA1922 protein, partial [Homo sapiens]                            | 2  | 3   | ; regulation of biological process   | 1.382 | 0.823 | 0.907 |
| 119632 | malignant T cell amplified sequence 1, isoform CRA_b [Homo sapi     | 2  | 8   | al process; response to stimulus     | 1.220 | 0.823 | 0.862 |
| 126545 | Adenylate kinase 1 [Homo sapiens]                                   | 3  | 20  | ; regulation of biological process   | 0.838 | 0.823 | 0.910 |
| 104360 | unnamed protein product [Homo sapiens]                              | 6  | 20  |                                      | 0.939 | 0.822 | 0.785 |
| 119577 | Rab acceptor 1 (prenylated), isoform CRA_a [Homo sapiens]           | 2  | 9   |                                      | 0.860 | 0.822 | 0.763 |
| 119570 | hCG1642531 [Homo sapiens]                                           | 2  | 30  | metabolic process                    | 0.844 | 0.822 | 0.819 |
| 756142 | Chain 0, Human Constitutive 20s Proteasome In Complex With Cat      | 8  | 48  |                                      | 0.913 | 0.822 | 0.819 |
| 409800 | unnamed protein product, partial [Homo sapiens]                     | 2  | 17  |                                      | 1.099 | 0.822 | 0.878 |
| 389152 | Chain D, Human Glyoxalase I Q33e, E172q Double Mutant               | 5  | 10  |                                      | 1.137 | 0.821 | 0.947 |
| 194381 | unnamed protein product [Homo sapiens]                              | 2  | 4   | cell organization and biogenesis     | 0.890 | 0.821 | 0.716 |
| 767931 | PREDICTED: heat shock 70 kDa protein 4L isoform X2 [Homo sapi       | 7  | 17  | ic process; response to stimulus     | 0.998 | 0.821 | 0.866 |
| 189065 | unnamed protein product [Homo sapiens]                              | 7  | 49  | ization and biogenesis; transport    | 1.020 | 0.821 | 0.781 |
| 119618 | hCG2045883 [Homo sapiens]                                           | 2  | 3   | transport                            | 0.921 | 0.821 | 0.856 |
| 221045 | unnamed protein product [Homo sapiens]                              | 4  | 13  |                                      | 0.910 | 0.821 | 0.981 |
| 158261 | unnamed protein product [Homo sapiens]                              | 3  | 3   | al process; response to stimulus     | 1.053 | 0.821 | 0.764 |
| 767995 | PREDICTED: pyridoxine-5'-phosphate oxidase isoform X2 [Homo s       | 3  | 10  | gical process; metabolic process     | 1.114 | 0.821 | 0.795 |
| 150105 | heat shock protein gp96 precursor, partial [Homo sapiens]           | 26 | 452 | nd biogenesis; defense response      | 1.173 | 0.821 | 0.927 |
| 767981 | PREDICTED: nuclear export mediator factor NEMF isoform X3 [Ho       | 5  | 13  | transport                            | 1.014 | 0.821 | 0.873 |
| 482559 | UTP--glucose-1-phosphate uridylyltransferase isoform a [Homo sa     | 8  | 26  | metabolic process                    | 0.945 | 0.820 | 0.818 |
| 119578 | solute carrier family 11 (proton-coupled divalent metal ion transpo | 2  | 4   | cell organization and biogenesis     | 0.794 | 0.820 | 0.746 |
| 551547 | prosome beta-subunit [Homo sapiens]                                 | 5  | 14  | ent movement; defense response       | 0.944 | 0.820 | 0.834 |
| 488462 | cytokine receptor-like molecule 9 [Homo sapiens]                    | 4  | 20  | regulation of biological process     | 1.067 | 0.820 | 0.842 |
| 530414 | PREDICTED: 3-ketodihydrosphingosine reductase isoform X2 [Ho        | 2  | 4   | metabolic process                    | 1.359 | 0.820 | 0.911 |
| 119608 | chromosome 9 open reading frame 86, isoform CRA_a [Homo sapi        | 3  | 6   | al process; response to stimulus     | 0.887 | 0.820 | 0.863 |
| 530404 | PREDICTED: protein sel-1 homolog 1 isoform X1 [Homo sapiens]        | 9  | 29  | ; response to stimulus; transport    | 1.053 | 0.820 | 0.800 |
| 272626 | nuclear autoantigenic sperm protein isoform 3 [Homo sapiens]        | 5  | 22  | ; transport; response to stimulus    | 0.958 | 0.819 | 0.798 |
| 767922 | PREDICTED: calpain-7 isoform X3 [Homo sapiens]                      | 2  | 3   | gical process; metabolic process     | 1.159 | 0.819 | 0.797 |
| 388232 | KIAA0803 protein, partial [Homo sapiens]                            | 2  | 3   | ent movement; defense response       | 0.948 | 0.819 | 0.816 |
| 117938 | protein GNAS isoform g [Homo sapiens]                               | 14 | 72  | response to stimulus; coagulation    | 1.362 | 0.819 | 0.847 |
| 119594 | echinoderm microtubule associated protein like 3, isoform CRA_c     | 6  | 11  |                                      | 1.086 | 0.819 | 0.855 |
| 767993 | PREDICTED: 2',3'-cyclic-nucleotide 3'-phosphodiesterase isoform     | 12 | 68  | se to stimulus; cell differentiation | 1.124 | 0.819 | 0.859 |



|        |                                                                    |    |     |                                      |       |       |       |
|--------|--------------------------------------------------------------------|----|-----|--------------------------------------|-------|-------|-------|
| 194377 | unnamed protein product [Homo sapiens]                             | 5  | 11  | transport; metabolic process         | 0.850 | 0.819 | 0.750 |
| 119596 | solute carrier family 12 (potassium/chloride transporters), member | 4  | 10  | transport; cellular homeostasis      | 0.940 | 0.818 | 0.842 |
| 119593 | hCG2004980, isoform CRA_i [Homo sapiens]                           | 2  | 4   | ; regulation of biological process   | 1.074 | 0.818 | 0.849 |
| 119595 | NADH dehydrogenase (ubiquinone) flavoprotein 1, 51kDa, isoform     | 6  | 13  | metabolic process                    | 1.021 | 0.818 | 0.872 |
| 459358 | Chain B, Crystal Structure Of Mst4-mo25 Complex With Dki           | 2  | 3   |                                      | 1.081 | 0.818 | 0.830 |
| 194384 | unnamed protein product [Homo sapiens]                             | 4  | 9   | olic process; cell death; transport  | 0.950 | 0.818 | 0.817 |
| 285002 | cytochrome c-type heme lyase [Homo sapiens]                        | 2  | 4   | metabolic process                    | 0.988 | 0.818 | 0.827 |
| 557796 | Po66 carbohydrate binding protein [Homo sapiens]                   | 5  | 9   | ; regulation of biological process   | 0.958 | 0.817 | 0.751 |
| 189053 | unnamed protein product [Homo sapiens]                             | 7  | 36  | erentiation; cellular homeostasis    | 1.134 | 0.816 | 0.908 |
| 175296 | protein kinase C inhibitor-2 [Homo sapiens]                        | 2  | 12  | metabolic process; cell death        | 1.099 | 0.816 | 0.931 |
| 189054 | unnamed protein product [Homo sapiens]                             | 3  | 5   | cell death; response to stimulus     | 0.848 | 0.816 | 0.752 |
| 193785 | unnamed protein product [Homo sapiens]                             | 2  | 7   | ; regulation of biological process   | 1.193 | 0.815 | 0.848 |
| 119583 | thioredoxin-like 1, isoform CRA_b [Homo sapiens]                   | 2  | 6   | ; regulation of biological process   | 1.631 | 0.815 | 0.939 |
| 189067 | unnamed protein product [Homo sapiens]                             | 9  | 42  | al process; response to stimulus     | 1.040 | 0.815 | 0.870 |
| 503198 | 26S proteasome non-ATPase regulatory subunit 14 [Homo sapiens]     | 3  | 6   | ent movement; defense response       | 0.845 | 0.815 | 0.868 |
| 119590 | translin-associated factor X, isoform CRA_b [Homo sapiens]         | 3  | 3   | ; regulation of biological process   | 1.172 | 0.815 | 0.849 |
| 158261 | unnamed protein product [Homo sapiens]                             | 15 | 116 | se to stimulus; defense response     | 1.025 | 0.815 | 0.793 |
| 412814 | basic leucine zipper and W2 domain-containing protein 1 isoform    | 5  | 11  | ; regulation of biological process   | 0.965 | 0.814 | 0.868 |
| 193786 | unnamed protein product [Homo sapiens]                             | 6  | 25  | se to stimulus; metabolic process    | 0.896 | 0.813 | 0.854 |
| 119590 | 5-aminoimidazole-4-carboxamide ribonucleotide formyltransferase    | 18 | 77  | ic process; response to stimulus     | 1.059 | 0.813 | 0.859 |
| 767962 | PREDICTED: nuclear factor NF-kappa-B p100 subunit isoform X2 [     | 6  | 13  | cell organization and biogenesis     | 0.932 | 0.813 | 0.852 |
| 299758 | dynamamin-2 isoform 5 [Homo sapiens]                               | 15 | 50  | cell organization and biogenesis     | 1.053 | 0.813 | 0.907 |
| 119625 | phosphoribosyl pyrophosphate amidotransferase, isoform CRA_a       | 7  | 39  | cell organization and biogenesis     | 1.010 | 0.813 | 0.870 |
| 589058 | vacuolar protein sorting-associated protein 11 homolog isoform 2   | 2  | 3   | cell organization and biogenesis     | 0.908 | 0.812 | 0.850 |
| 153419 | Unknown (protein for IMAGE:4347401), partial [Homo sapiens]        | 14 | 223 | f biological process; cell division  | 1.163 | 0.812 | 0.842 |
| 712972 | DNAJB6 protein [Homo sapiens]                                      | 2  | 13  | se to stimulus; cell differentiation | 0.950 | 0.812 | 0.882 |
| 119619 | hCG1983058 [Homo sapiens]                                          | 2  | 9   | metabolic process                    | 0.833 | 0.812 | 0.763 |
| 194378 | unnamed protein product [Homo sapiens]                             | 3  | 9   | se to stimulus; defense response     | 0.856 | 0.811 | 0.873 |
| 887492 | Chain b, Structure Of The Hcv Ires Bound To The Human Ribosom      | 2  | 13  |                                      | 0.935 | 0.811 | 0.678 |
| 132792 | ALG3 protein, partial [Homo sapiens]                               | 2  | 5   | metabolic process                    | 1.261 | 0.811 | 0.808 |
| 208610 | atlastin-2 isoform 2 [Homo sapiens]                                | 4  | 6   | cell organization and biogenesis     | 0.819 | 0.811 | 0.737 |
| 409814 | unnamed protein product, partial [Homo sapiens]                    | 2  | 10  |                                      | 0.891 | 0.810 | 0.831 |
| 223461 | Leucine rich repeat containing 26 [Homo sapiens]                   | 2  | 4   | transport                            | 0.854 | 0.810 | 0.812 |
| 119598 | talin 2, isoform CRA_c [Homo sapiens]                              | 7  | 26  | cell organization and biogenesis     | 1.021 | 0.810 | 0.873 |
| 119592 | FK506 binding protein 12-rapamycin associated protein 1, isoform   | 4  | 9   | nd biogenesis; defense response      | 0.956 | 0.809 | 0.835 |
| 400416 | unnamed protein product, partial [Homo sapiens]                    | 4  | 13  |                                      | 0.970 | 0.808 | 0.871 |
| 767931 | PREDICTED: G-rich sequence factor 1 isoform X1 [Homo sapiens]      | 3  | 19  | metabolic process                    | 1.010 | 0.808 | 0.873 |
| 194374 | unnamed protein product [Homo sapiens]                             | 2  | 4   | al process; response to stimulus     | 0.923 | 0.808 | 0.853 |
| 400422 | unnamed protein product, partial [Homo sapiens]                    | 3  | 9   |                                      | 0.814 | 0.808 | 0.810 |
| 316983 | cytochrome b-c1 complex subunit 7 isoform 2 [Homo sapiens]         | 3  | 18  | metabolic process                    | 1.022 | 0.807 | 0.946 |

|        |                                                                           |    |     |                                     |       |       |       |
|--------|---------------------------------------------------------------------------|----|-----|-------------------------------------|-------|-------|-------|
| 194374 | unnamed protein product [Homo sapiens]                                    | 4  | 17  | metabolic process                   | 1.086 | 0.807 | 0.790 |
| 530376 | PREDICTED: ankyrin repeat domain-containing protein 17 isoform            | 4  | 7   | response; response to stimulus      | 0.812 | 0.806 | 0.770 |
| 767942 | PREDICTED: cyclin-dependent kinase 19 isoform X3 [Homo sapiens]           | 2  | 8   | al process; response to stimulus    | 0.880 | 0.806 | 0.870 |
| 158254 | unnamed protein product [Homo sapiens]                                    | 9  | 47  | metabolic process                   | 0.979 | 0.806 | 0.843 |
| 119608 | G protein-coupled receptor 107, isoform CRA_e [Homo sapiens]              | 2  | 4   | transport                           | 0.914 | 0.806 | 0.852 |
| 119581 | proteasome (prosome, macropain) 26S subunit, non-ATPase, 13, isoform      | 11 | 33  | ent movement; defense response      | 1.102 | 0.806 | 0.895 |
| 189055 | unnamed protein product [Homo sapiens]                                    | 6  | 76  | biological process; cell division   | 1.186 | 0.806 | 0.855 |
| 239782 | Chain D, Human Sahn-Like Domain Of Human Adenosylhomocyste                | 8  | 44  | metabolic process; transport        | 0.977 | 0.806 | 0.935 |
| 256985 | TRAM adaptor with GOLD domain isoform 2 precursor [Homo sapiens]          | 6  | 25  | transport                           | 1.040 | 0.806 | 0.840 |
| 625311 | LRRC41 protein, partial [Homo sapiens]                                    | 2  | 3   | metabolic process                   | 0.973 | 0.806 | 0.853 |
| 546963 | protein phosphatase 1, catalytic subunit, beta isoform [Homo sapiens]     | 6  | 42  | sponse to stimulus; cell division   | 1.043 | 0.805 | 0.784 |
| 119584 | hCG1995701, isoform CRA_d [Homo sapiens]                                  | 6  | 38  | nd biogenesis; defense response     | 1.100 | 0.805 | 0.844 |
| 119615 | succinate dehydrogenase complex, subunit B, iron sulfur (lp), isoform     | 6  | 31  | metabolic process                   | 1.030 | 0.805 | 0.784 |
| 119607 | hypothetical protein FLJ20397, isoform CRA_e [Homo sapiens]               | 4  | 7   | cell organization and biogenesis    | 1.128 | 0.805 | 0.831 |
| 767972 | PREDICTED: citron Rho-interacting kinase isoform X7 [Homo sapiens]        | 4  | 7   | e to stimulus; cell differentiation | 0.683 | 0.805 | 0.781 |
| 127798 | Proteasome (prosome, macropain) 26S subunit, non-ATPase, 8 [Homo sapiens] | 5  | 18  | nd biogenesis; defense response     | 1.199 | 0.804 | 0.896 |
| 119627 | hook homolog 1 (Drosophila), isoform CRA_b [Homo sapiens]                 | 3  | 6   | genesis; development; transport     | 1.256 | 0.804 | 0.893 |
| 119617 | keratin 5 (epidermolysis bullosa simplex, Dowling-Meara/Kobner/M          | 24 | 146 | cell organization and biogenesis    | 0.987 | 0.804 | 1.180 |
| 720062 | Chain D, Lactate Dehydrogenase In Complex With Inhibitor Comp             | 16 | 300 | metabolic process                   | 1.075 | 0.804 | 0.750 |
| 578806 | PREDICTED: structural maintenance of chromosomes protein 4 isoform        | 4  | 6   | ; metabolic process; cell division  | 0.999 | 0.804 | 0.869 |
| 244386 | epsilon-COP, partial [Homo sapiens]                                       | 3  | 34  | cell organization and biogenesis    | 1.249 | 0.804 | 0.802 |
| 119626 | COP9 constitutive photomorphogenic homolog subunit 4 (Arabidopsis)        | 8  | 33  | biogenesis; response to stimulus    | 1.001 | 0.804 | 0.811 |
| 302566 | Chain B, Crystal Structure Of An Rb C-Terminal Peptide Bound To           | 7  | 51  |                                     | 0.961 | 0.804 | 0.784 |
| 119582 | diaphanous homolog 1 (Drosophila), isoform CRA_a [Homo sapiens]           | 7  | 12  | al process; response to stimulus    | 0.991 | 0.803 | 0.819 |
| 663442 | putative protein TH1, partial [Homo sapiens]                              | 3  | 5   | ; regulation of biological process  | 0.898 | 0.803 | 0.922 |
| 530360 | PREDICTED: protein LZIC isoform X1 [Homo sapiens]                         | 2  | 6   | response to stimulus                | 0.847 | 0.803 | 0.802 |
| 408896 | Chain A, Structure Of Arf1-Gdp Bound To Sec7 Domain Complexed             | 8  | 112 | al process; response to stimulus    | 1.222 | 0.803 | 0.841 |
| 756142 | Chain y, Human Constitutive 20s Proteasome In Complex With Car            | 4  | 13  |                                     | 0.915 | 0.802 | 0.796 |
| 241451 | surface 4 integral membrane protein, partial [Homo sapiens]               | 5  | 27  | n of biological process; transport  | 1.145 | 0.802 | 0.795 |
| 194380 | unnamed protein product [Homo sapiens]                                    | 4  | 12  | ; regulation of biological process  | 1.027 | 0.802 | 0.801 |
| 119581 | NudC domain containing 2 [Homo sapiens]                                   | 2  | 5   |                                     | 0.943 | 0.802 | 0.696 |
| 119617 | oxysterol binding protein-like 8, isoform CRA_a, partial [Homo sapiens]   | 3  | 5   | cell organization and biogenesis    | 1.025 | 0.802 | 0.836 |
| 119619 | phosphoribosyl pyrophosphate synthetase 2, isoform CRA_b [Homo sapiens]   | 6  | 19  | metabolic process                   | 1.190 | 0.801 | 0.783 |
| 694106 | c371H6.2 (similar to NDP kinase), partial [Homo sapiens]                  | 7  | 23  | ; regulation of biological process  | 0.942 | 0.801 | 0.793 |
| 217486 | FLJ00410 protein, partial [Homo sapiens]                                  | 3  | 11  |                                     | 0.801 | 0.800 | 0.674 |
| 578802 | PREDICTED: bifunctional methylenetetrahydrofolate dehydrogenase           | 3  | 3   | metabolic process                   | 0.936 | 0.800 | 0.860 |
| 119630 | hCG39342, isoform CRA_d [Homo sapiens]                                    | 3  | 5   | cell organization and biogenesis    | 0.884 | 0.800 | 0.719 |
| 196049 | Chain D, Crystal Structure Of Human Fumarate Hydratase                    | 8  | 44  | metabolic process                   | 1.103 | 0.799 | 0.818 |
| 214347 | beige-like protein [Homo sapiens]                                         | 32 | 105 | transport                           | 1.084 | 0.799 | 0.786 |
| 756142 | Chain u, Human Constitutive 20s Proteasome In Complex With Car            | 5  | 37  |                                     | 1.052 | 0.799 | 0.788 |

|        |                                                                                             |    |     |                                                     |       |       |       |
|--------|---------------------------------------------------------------------------------------------|----|-----|-----------------------------------------------------|-------|-------|-------|
| 376744 | unknown [Homo sapiens]                                                                      | 24 | 256 | regulation of biological process                    | 1.003 | 0.798 | 0.805 |
| 347859 | PPP2R2D protein, partial [Homo sapiens]                                                     | 4  | 7   | response to stimulus; cell division                 | 1.124 | 0.798 | 0.835 |
| 629889 | unknown [Homo sapiens]                                                                      | 7  | 37  | metabolic process                                   | 1.034 | 0.798 | 0.757 |
| 400413 | unnamed protein product, partial [Homo sapiens]                                             | 2  | 9   |                                                     | 1.029 | 0.797 | 0.782 |
| 530412 | PREDICTED: signal transducer and activator of transcription 5B isoform 1 [Homo sapiens]     | 3  | 5   | cellular process; response to stimulus              | 1.072 | 0.797 | 0.784 |
| 181238 | cytochrome c1, partial [Homo sapiens]                                                       | 5  | 70  | cellular process; response to stimulus              | 0.789 | 0.797 | 0.808 |
| 266107 | similar to 26S proteasome subunit p45 [Homo sapiens]                                        | 7  | 58  | cellular movement; defense response                 | 1.188 | 0.797 | 0.894 |
| 702013 | unnamed protein product [Homo sapiens]                                                      | 2  | 7   | metabolic process                                   | 1.013 | 0.797 | 0.971 |
| 119586 | chromosome 18 open reading frame 55, isoform CRA_b [Homo sapiens]                           | 4  | 10  | cellular biogenesis; metabolic process              | 1.150 | 0.796 | 0.862 |
| 194386 | unnamed protein product [Homo sapiens]                                                      | 4  | 19  | regulation of biological process                    | 1.349 | 0.796 | 0.846 |
| 189065 | unnamed protein product [Homo sapiens]                                                      | 12 | 74  | cell organization and biogenesis                    | 0.860 | 0.796 | 0.790 |
| 296531 | histone lysine demethylase PHF8 isoform 4 [Homo sapiens]                                    | 2  | 4   | regulation of biological process                    | 1.024 | 0.796 | 0.769 |
| 119599 | coatamer protein complex, subunit beta 2 (beta prime), isoform CR [Homo sapiens]            | 30 | 129 | cell organization and biogenesis                    | 1.125 | 0.795 | 0.785 |
| 221041 | unnamed protein product [Homo sapiens]                                                      | 4  | 18  | metabolic process; cell differentiation             | 0.782 | 0.795 | 0.753 |
| 158259 | unnamed protein product [Homo sapiens]                                                      | 10 | 42  | cellular process; response to stimulus              | 1.042 | 0.795 | 0.803 |
| 255958 | perilipin-3 isoform 3 [Homo sapiens]                                                        | 4  | 17  | transport                                           | 0.919 | 0.795 | 0.727 |
| 854103 | chloride channel 3 [Homo sapiens]                                                           | 3  | 7   | cellular process; cellular homeostasis              | 1.143 | 0.794 | 0.863 |
| 412815 | WD repeat-containing protein 37 [Homo sapiens]                                              | 3  | 4   |                                                     | 0.998 | 0.794 | 0.853 |
| 194389 | unnamed protein product [Homo sapiens]                                                      | 2  | 3   |                                                     | 0.708 | 0.794 | 0.872 |
| 194388 | unnamed protein product [Homo sapiens]                                                      | 3  | 8   | regulation of biological process                    | 0.779 | 0.794 | 0.773 |
| 753534 | Chain A, Importin Alpha 3 Delta Ibb In Complex With Influenza Pb2 [Homo sapiens]            | 3  | 7   |                                                     | 1.013 | 0.793 | 0.886 |
| 221043 | unnamed protein product [Homo sapiens]                                                      | 6  | 23  | cellular process; response to stimulus              | 1.005 | 0.793 | 0.785 |
| 578805 | PREDICTED: protein TANC1 isoform X17 [Homo sapiens]                                         | 9  | 18  | cell organization and biogenesis                    | 1.024 | 0.793 | 0.773 |
| 494565 | RABGGTA, partial [Homo sapiens]                                                             | 10 | 21  | metabolic process                                   | 0.940 | 0.793 | 0.815 |
| 164519 | Chain Y, Crystal Structure Of Human Peroxiredoxin I In Complex With [Homo sapiens]          | 2  | 5   |                                                     | 1.017 | 0.793 | 0.701 |
| 194375 | unnamed protein product [Homo sapiens]                                                      | 4  | 7   | metabolic process; transport                        | 1.150 | 0.792 | 0.909 |
| 116283 | PSMA7 protein, partial [Homo sapiens]                                                       | 7  | 50  | cellular movement; defense response                 | 1.321 | 0.792 | 0.896 |
| 673960 | talín [Homo sapiens]                                                                        | 36 | 132 | response to stimulus; metabolic process             | 0.987 | 0.792 | 0.795 |
| 119583 | protein phosphatase 2 (formerly 2A), regulatory subunit B (PR 52), isoform 1 [Homo sapiens] | 8  | 22  | cellular process; response to stimulus              | 1.181 | 0.792 | 0.841 |
| 289191 | golgin subfamily A member 3 isoform 2 [Homo sapiens]                                        | 6  | 16  | regulation of biological process                    | 1.016 | 0.792 | 0.849 |
| 119568 | chromosome 6 open reading frame 55, isoform CRA_b [Homo sapiens]                            | 3  | 6   | cell organization and biogenesis                    | 0.991 | 0.791 | 0.877 |
| 768001 | PREDICTED: bromodomain-containing protein 4 isoform X2 [Homo sapiens]                       | 2  | 11  | cellular process; response to stimulus              | 1.191 | 0.791 | 0.865 |
| 768021 | PREDICTED: cystathionine beta-synthase isoform X5 [Homo sapiens]                            | 9  | 55  | cellular communication; response to stimulus        | 1.143 | 0.791 | 0.857 |
| 194382 | unnamed protein product [Homo sapiens]                                                      | 6  | 14  | regulation of biological process                    | 1.042 | 0.791 | 0.805 |
| 175122 | C8orf55 protein [Homo sapiens]                                                              | 7  | 20  |                                                     | 1.069 | 0.790 | 0.625 |
| 193786 | unnamed protein product [Homo sapiens]                                                      | 2  | 4   | regulation of biological process                    | 1.170 | 0.790 | 0.781 |
| 530385 | PREDICTED: leucine-rich repeat and WD repeat-containing protein 1 [Homo sapiens]            | 2  | 6   | cell organization and biogenesis                    | 0.984 | 0.790 | 0.728 |
| 189054 | unnamed protein product [Homo sapiens]                                                      | 4  | 56  | cellular communication; transport; defense response | 0.993 | 0.790 | 0.825 |
| 380148 | DDX54 protein, partial [Homo sapiens]                                                       | 3  | 8   | cellular process; response to stimulus              | 0.883 | 0.790 | 0.827 |
| 119610 | tubulin-specific chaperone d, isoform CRA_c [Homo sapiens]                                  | 19 | 81  | regulation of biological process                    | 1.026 | 0.789 | 0.796 |

|        |                                                                    |    |     |                                      |       |       |       |
|--------|--------------------------------------------------------------------|----|-----|--------------------------------------|-------|-------|-------|
| 157829 | Chain A, N-Terminal Actin-Crosslinking Domain From Human Fiml      | 2  | 7   |                                      | 0.974 | 0.788 | 0.912 |
| 773946 | diphosphoinositol polyphosphate phosphohydrolase type 2 alpha,     | 3  | 7   | ; response to stimulus; transport    | 1.242 | 0.788 | 0.904 |
| 119626 | methionyl aminopeptidase 1, isoform CRA_a [Homo sapiens]           | 3  | 10  | ic process; response to stimulus     | 1.107 | 0.788 | 0.784 |
| 189053 | unnamed protein product [Homo sapiens]                             | 7  | 91  | al process; response to stimulus     | 1.348 | 0.788 | 0.833 |
| 967739 | unnamed protein product [Homo sapiens]                             | 7  | 83  |                                      | 1.184 | 0.788 | 0.756 |
| 108250 | unnamed protein product [Homo sapiens]                             | 4  | 18  |                                      | 0.917 | 0.788 | 0.886 |
| 508342 | unnamed protein product [Homo sapiens]                             | 3  | 15  |                                      | 1.195 | 0.788 | 0.721 |
| 194391 | unnamed protein product [Homo sapiens]                             | 2  | 5   | ss; metabolic process; transport     | 0.879 | 0.788 | 0.831 |
| 578802 | PREDICTED: DNA-directed RNA polymerase I subunit RPA1 isofor       | 2  | 4   | ; regulation of biological process   | 0.940 | 0.788 | 0.797 |
| 283739 | Chain C, Crystal Structure Of Human Saposin B                      | 2  | 9   |                                      | 1.107 | 0.787 | 0.759 |
| 189055 | unnamed protein product [Homo sapiens]                             | 2  | 10  | ; regulation of biological process   | 0.881 | 0.787 | 0.727 |
| 394582 | serine/threonine-protein phosphatase 2A 56 kDa regulatory subun    | 4  | 14  | bolic process; defense response      | 0.868 | 0.787 | 0.730 |
| 119590 | geranylgeranyl diphosphate synthase 1, isoform CRA_a [Homo sap     | 2  | 3   | metabolic process                    | 0.878 | 0.787 | 0.758 |
| 119594 | stress-induced-phosphoprotein 1 (Hsp70/Hsp90-organizing protei     | 15 | 93  | response to stimulus                 | 1.054 | 0.787 | 0.784 |
| 526959 | Chain A, Crystal Structure Of A Protein Phosphatase-1: Calcineuri  | 6  | 41  |                                      | 0.960 | 0.787 | 0.784 |
| 194376 | unnamed protein product [Homo sapiens]                             | 3  | 10  |                                      | 1.037 | 0.786 | 0.806 |
| 199236 | BR13-binding protein precursor [Homo sapiens]                      | 3  | 19  |                                      | 1.134 | 0.785 | 0.816 |
| 449802 | Chain D, Crystal Structure Of Coactivator-associated Arginine Met  | 7  | 26  |                                      | 1.042 | 0.785 | 0.821 |
| 173895 | CHORDC1 protein [Homo sapiens]                                     | 2  | 4   | gical process; metabolic process     | 1.071 | 0.784 | 0.711 |
| 189053 | unnamed protein product [Homo sapiens]                             | 3  | 23  | zation and biogenesis; transport     | 1.041 | 0.784 | 0.917 |
| 217272 | choline dehydrogenase, mitochondrial [Homo sapiens]                | 11 | 38  | metabolic process                    | 0.961 | 0.784 | 0.821 |
| 639916 | unknown [Homo sapiens]                                             | 2  | 43  | ic process; response to stimulus     | 1.030 | 0.784 | 0.802 |
| 194374 | unnamed protein product [Homo sapiens]                             | 2  | 4   |                                      | 0.983 | 0.784 | 0.809 |
| 329665 | Chain A, Crystal Structure Of Human S-adenosylmethionine Synth     | 4  | 7   | metabolic process                    | 1.045 | 0.784 | 0.650 |
| 152148 | TRNT1 protein [Homo sapiens]                                       | 4  | 10  | metabolic process; transport         | 0.818 | 0.783 | 0.842 |
| 119586 | hCG2033479, isoform CRA_d, partial [Homo sapiens]                  | 7  | 15  | zation and biogenesis; transport     | 0.862 | 0.783 | 0.834 |
| 194386 | unnamed protein product [Homo sapiens]                             | 4  | 10  | ; regulation of biological process   | 1.118 | 0.783 | 0.821 |
| 158260 | unnamed protein product [Homo sapiens]                             | 4  | 9   | ; regulation of biological process   | 1.140 | 0.783 | 0.847 |
| 119631 | GTP-binding protein PTD004, isoform CRA_c [Homo sapiens]           | 2  | 16  | metabolic process; transport         | 1.382 | 0.783 | 0.882 |
| 194389 | unnamed protein product [Homo sapiens]                             | 3  | 60  | ; regulation of biological process   | 0.806 | 0.783 | 0.767 |
| 119596 | CDC91 cell division cycle 91-like 1 (S. cerevisiae), isoform CRA_c | 2  | 8   | ; regulation of biological process   | 0.925 | 0.783 | 0.812 |
| 131088 | Chain A, Cyclophilin B Complexed With [d-(Cholinylester)ser8]-Cyc  | 9  | 78  | metabolic process                    | 1.143 | 0.782 | 0.816 |
| 119611 | IQ motif and WD repeats 1, isoform CRA_d [Homo sapiens]            | 2  | 4   | ; regulation of biological process   | 0.855 | 0.782 | 0.772 |
| 578813 | PREDICTED: aminoacyl tRNA synthase complex-interacting multif      | 2  | 11  | gical process; cell differentiation  | 0.915 | 0.781 | 0.839 |
| 170331 | RecName: Full=Annexin A4; AltName: Full=35-beta calcimedini; Alt   | 14 | 92  | se to stimulus; cell differentiation | 1.240 | 0.781 | 0.847 |
| 213356 | unnamed protein product [Homo sapiens]                             | 5  | 15  |                                      | 0.903 | 0.781 | 0.732 |
| 119594 | reticulon 3, isoform CRA_a [Homo sapiens]                          | 3  | 30  | cell organization and biogenesis     | 0.959 | 0.781 | 0.710 |
| 142905 | RBM17 protein, partial [Homo sapiens]                              | 2  | 9   | metabolic process                    | 0.754 | 0.781 | 0.791 |
| 220702 | Chain C, TapasinERP57 HETERODIMER                                  | 14 | 236 | ; regulation of biological process   | 1.245 | 0.781 | 0.842 |
| 119608 | ectonucleoside triphosphate diphosphohydrolase 2, isoform CRA      | 7  | 39  | cell organization and biogenesis     | 0.966 | 0.780 | 0.707 |



|        |                                                                         |    |     |                                      |       |       |       |
|--------|-------------------------------------------------------------------------|----|-----|--------------------------------------|-------|-------|-------|
| 119623 | phosphoribosyl pyrophosphate synthetase 1, isoform CRA_a [Homo sapiens] | 8  | 25  | metabolic process; cell death        | 1.225 | 0.780 | 0.759 |
| 347850 | ACBD3 protein, partial [Homo sapiens]                                   | 3  | 5   | metabolic process; transport         | 1.188 | 0.780 | 0.804 |
| 767977 | PREDICTED: DNA polymerase epsilon catalytic subunit A isoform           | 2  | 3   | ic process; cellular homeostasis     | 1.042 | 0.780 | 0.829 |
| 119590 | HEAT repeat containing 1, isoform CRA_b [Homo sapiens]                  | 7  | 18  | ; regulation of biological process   | 1.106 | 0.779 | 0.906 |
| 767988 | PREDICTED: exportin-6 isoform X5 [Homo sapiens]                         | 4  | 7   | transport                            | 1.057 | 0.779 | 0.873 |
| 119569 | peroxiredoxin 3, isoform CRA_a, partial [Homo sapiens]                  | 6  | 74  | bolic process; cell differentiation  | 0.991 | 0.779 | 0.922 |
| 388604 | Chain p, Crystalstructure Of The Ubiquitin Protease                     | 5  | 61  |                                      | 1.112 | 0.778 | 0.779 |
| 385719 | caseinolytic peptidase B protein homolog isoform 2 [Homo sapien]        | 3  | 13  | ic process; response to stimulus     | 0.940 | 0.778 | 0.729 |
| 767980 | PREDICTED: ERO1-like protein alpha isoform X1 [Homo sapiens]            | 8  | 23  | sis; cell differentiation; transport | 1.249 | 0.778 | 0.847 |
| 119568 | villin 2 (ezrin), isoform CRA_a [Homo sapiens]                          | 23 | 207 | ifferentiation; metabolic process    | 1.049 | 0.777 | 0.809 |
| 767996 | PREDICTED: glucose-6-phosphatase 3 isoform X1 [Homo sapiens]            | 2  | 4   | metabolic process; transport         | 1.073 | 0.777 | 0.862 |
| 767926 | PREDICTED: golgin subfamily B member 1 isoform X9 [Homo sapi]           | 7  | 16  | cell organization and biogenesis     | 0.879 | 0.776 | 0.807 |
| 556503 | nucleolar protein 9 isoform 2 [Homo sapiens]                            | 4  | 22  |                                      | 0.818 | 0.776 | 0.805 |
| 119626 | asparagine-linked glycosylation 6 homolog (yeast, alpha-1,3-gluco       | 3  | 5   | metabolic process                    | 1.118 | 0.776 | 0.793 |
| 385648 | isocitrate dehydrogenase [NAD] subunit beta, mitochondrial isofor       | 5  | 10  | metabolic process                    | 1.040 | 0.775 | 0.694 |
| 530390 | PREDICTED: golgin subfamily A member 2 isoform X3 [Homo sapi]           | 12 | 44  | ; regulation of biological process   | 1.047 | 0.774 | 0.719 |
| 384475 | histidine--tRNA ligase, cytoplasmic isoform 4 [Homo sapiens]            | 7  | 31  | cell organization and biogenesis     | 1.026 | 0.773 | 0.824 |
| 189065 | unnamed protein product [Homo sapiens]                                  | 9  | 44  | al process; response to stimulus     | 1.061 | 0.773 | 0.771 |
| 119621 | signal transducer and activator of transcription 3 interacting prote    | 7  | 16  | d biogenesis; metabolic process      | 0.956 | 0.773 | 0.781 |
| 189339 | Chain A, Crystal Structure Of Human Catechol O-Methyltransferase        | 4  | 11  | metabolic process                    | 1.545 | 0.772 | 0.782 |
| 194389 | unnamed protein product [Homo sapiens]                                  | 2  | 3   | ; regulation of biological process   | 1.327 | 0.771 | 0.799 |
| 189065 | unnamed protein product [Homo sapiens]                                  | 29 | 129 | ; regulation of biological process   | 1.180 | 0.771 | 0.768 |
| 578811 | PREDICTED: endoplasmic reticulum-Golgi intermediate compartm            | 8  | 31  | transport                            | 0.950 | 0.770 | 0.764 |
| 400423 | unnamed protein product, partial [Homo sapiens]                         | 2  | 25  |                                      | 0.878 | 0.770 | 0.792 |
| 119609 | O-acyltransferase (membrane bound) domain containing 5, isoforr         | 3  | 5   | ; regulation of biological process   | 1.241 | 0.770 | 0.805 |
| 119605 | hCG41030 [Homo sapiens]                                                 | 3  | 21  | metabolic process                    | 0.976 | 0.770 | 0.707 |
| 931139 | Chain A, Crystal Structure Of 2,2'-(naphthalene-1,4-diylbis(((4-meth    | 2  | 3   |                                      | 0.953 | 0.769 | 0.767 |
| 104356 | unnamed protein product [Homo sapiens]                                  | 2  | 9   |                                      | 1.065 | 0.768 | 0.725 |
| 211826 | PRKCSH protein, partial [Homo sapiens]                                  | 7  | 47  | se to stimulus; defense response     | 1.092 | 0.768 | 0.743 |
| 216187 | Unknown (protein for IMAGE:5116230), partial [Homo sapiens]             | 5  | 9   | transport                            | 0.886 | 0.768 | 0.790 |
| 313482 | biogenesis of lysosome-related organelles complex 1 subunit 5 iso       | 2  | 2   | ; regulation of biological process   | 1.146 | 0.768 | 0.884 |
| 119581 | arginyl-tRNA synthetase [Homo sapiens]                                  | 15 | 83  | metabolic process                    | 0.913 | 0.767 | 0.798 |
| 119630 | tryptophan rich basic protein, isoform CRA_b [Homo sapiens]             | 3  | 6   |                                      | 0.880 | 0.767 | 0.732 |
| 122484 | cisplatin resistance related protein CRR9p [Homo sapiens]               | 5  | 11  | cell death                           | 0.955 | 0.765 | 0.753 |
| 140438 | EIF2S2 protein [Homo sapiens]                                           | 4  | 21  | on; metabolic process; transport     | 1.263 | 0.765 | 0.861 |
| 392055 | EGLN1, partial [Homo sapiens]                                           | 2  | 4   | ; regulation of biological process   | 0.981 | 0.764 | 0.780 |
| 217538 | unnamed protein product [Homo sapiens]                                  | 2  | 6   | cell organization and biogenesis     | 0.971 | 0.764 | 0.787 |
| 528881 | electron transfer flavoprotein-ubiquinone oxidoreductase, mitoch        | 4  | 17  | e to stimulus; metabolic process     | 0.945 | 0.764 | 0.820 |
| 119603 | vacuolar protein sorting 4A (yeast), isoform CRA_a [Homo sapiens]       | 3  | 12  | f biological process; cell division  | 1.204 | 0.763 | 0.859 |
| 525458 | hypothetical protein, partial [Homo sapiens]                            | 4  | 6   | metabolic process                    | 1.152 | 0.763 | 0.831 |

|        |                                                                   |    |     |                                       |       |       |       |
|--------|-------------------------------------------------------------------|----|-----|---------------------------------------|-------|-------|-------|
| 680824 | hypothetical protein, partial [Homo sapiens]                      | 9  | 43  | regulation of biological process      | 0.899 | 0.762 | 0.775 |
| 620894 | ralA binding protein 1 variant, partial [Homo sapiens]            | 2  | 6   | regulation of biological process      | 0.938 | 0.762 | 0.798 |
| 659835 | Chain A, Vesiculoviral Matrix (m) Protein Occupies Nucleic Acid B | 2  | 14  |                                       | 1.250 | 0.762 | 0.809 |
| 408812 | unnamed protein product [Homo sapiens]                            | 3  | 5   |                                       | 1.097 | 0.762 | 0.754 |
| 159291 | MARS protein, partial [Homo sapiens]                              | 13 | 56  | metabolic process                     | 1.064 | 0.761 | 0.762 |
| 768025 | PREDICTED: ran GTPase-activating protein 1 isoform X1 [Homo sa    | 5  | 40  | al process; response to stimulus      | 1.055 | 0.761 | 0.775 |
| 119571 | tight junction protein 1 (zona occludens 1), isoform CRA_c [Homo  | 8  | 28  | to stimulus; cell communication       | 0.905 | 0.761 | 0.794 |
| 193783 | unnamed protein product [Homo sapiens]                            | 2  | 4   | regulation of biological process      | 1.227 | 0.761 | 0.828 |
| 449112 | Chain D, Crystal Structures Of Native And Inhibited Forms Of Hum  | 6  | 24  | metabolic process                     | 0.926 | 0.761 | 0.765 |
| 126533 | Phosphoglycerate mutase 1 (brain) [Homo sapiens]                  | 5  | 60  | regulation of biological process      | 1.004 | 0.760 | 0.723 |
| 194389 | unnamed protein product [Homo sapiens]                            | 3  | 17  | cell organization and biogenesis      | 0.974 | 0.760 | 0.784 |
| 119583 | phosphoserine aminotransferase 1, isoform CRA_d [Homo sapien      | 6  | 27  | metabolic process                     | 1.047 | 0.760 | 0.781 |
| 223460 | KIAA1244 [Homo sapiens]                                           | 14 | 35  | n of biological process; transport    | 1.006 | 0.759 | 0.747 |
| 530425 | PREDICTED: 1-phosphatidylinositol 4,5-bisphosphate phosphodie     | 2  | 5   | al process; response to stimulus      | 0.817 | 0.758 | 0.756 |
| 158429 | Chain A, Crystal Structure Of The Selenocysteine To Cysteine Mut  | 3  | 12  | e to stimulus; metabolic process      | 1.055 | 0.758 | 0.810 |
| 530390 | PREDICTED: endoplasmic reticulum metalloproteinase 1 isoform X    | 5  | 13  | metabolic process                     | 1.001 | 0.757 | 0.793 |
| 108250 | unnamed protein product [Homo sapiens]                            | 2  | 5   |                                       | 0.809 | 0.757 | 0.668 |
| 684117 | HSPC260, partial [Homo sapiens]                                   | 2  | 7   | cell organization and biogenesis      | 0.842 | 0.756 | 0.822 |
| 179395 | N-acetylneuraminic acid synthase [Homo sapiens]                   | 3  | 10  | metabolic process                     | 1.167 | 0.756 | 0.781 |
| 768011 | PREDICTED: alpha-soluble NSF attachment protein isoform X2 [Ho    | 2  | 12  | cell organization and biogenesis      | 1.109 | 0.755 | 0.778 |
| 194388 | unnamed protein product [Homo sapiens]                            | 2  | 4   | d biogenesis; metabolic process       | 1.025 | 0.755 | 0.712 |
| 194381 | unnamed protein product [Homo sapiens]                            | 4  | 12  | ifferentiation; metabolic process     | 0.908 | 0.755 | 0.853 |
| 168203 | gastric cancer hepatocellular carcinoma suppressor 1 variant [Hor | 2  | 4   | transport                             | 0.757 | 0.754 | 0.775 |
| 119620 | sorting nexin 17, isoform CRA_c [Homo sapiens]                    | 2  | 4   | al process; response to stimulus      | 0.856 | 0.754 | 0.715 |
| 126544 | RecQ protein-like (DNA helicase Q1-like) [Homo sapiens]           | 9  | 27  | ic process; response to stimulus      | 1.016 | 0.754 | 0.671 |
| 115144 | Chain H, Glutathione Transferase P1-1                             | 6  | 54  |                                       | 1.062 | 0.754 | 0.692 |
| 471151 | STX12, partial [Homo sapiens]                                     | 3  | 7   | regulation of biological process      | 1.112 | 0.754 | 0.868 |
| 767901 | PREDICTED: nuclear migration protein nudC isoform X2 [Homo sa     | 4  | 17  | nt; cell proliferation; cell division | 1.124 | 0.753 | 0.755 |
| 119589 | ATP synthase, H+ transporting, mitochondrial F1 complex, delta s  | 2  | 26  | ; transport; response to stimulus     | 1.042 | 0.753 | 0.703 |
| 471234 | RPLP0 protein [Homo sapiens]                                      | 8  | 40  | ization and biogenesis; transport     | 0.942 | 0.752 | 0.793 |
| 578807 | PREDICTED: DNA-directed RNA polymerases I, II, and III subunit R  | 3  | 42  | gical process; defense response       | 1.245 | 0.751 | 0.809 |
| 384925 | Chain D, Human TfiiaTBP DNA COMPLEX                               | 2  | 3   | metabolic process                     | 0.870 | 0.751 | 0.810 |
| 119575 | guanosine monophosphate reductase, isoform CRA_a [Homo sapi       | 2  | 5   | ic process; response to stimulus      | 0.897 | 0.751 | 0.730 |
| 514761 | hypothetical protein [Homo sapiens]                               | 11 | 41  | regulation of biological process      | 0.873 | 0.749 | 0.703 |
| 754654 | Chain B, Crystal Structure Of Human Cathepsin X                   | 3  | 24  | metabolic process                     | 0.984 | 0.748 | 0.789 |
| 557786 | probable palmitoyltransferase ZDHHC20 isoform 2 [Homo sapiens]    | 2  | 3   | sis; transport; metabolic process     | 0.850 | 0.748 | 0.648 |
| 775675 | TMX3 protein, partial [Homo sapiens]                              | 3  | 8   | regulation of biological process      | 0.875 | 0.748 | 0.786 |
| 142505 | Protein-L-isoaspartate (D-aspartate) O-methyltransferase [Homo sa | 4  | 34  | metabolic process                     | 0.906 | 0.748 | 0.731 |
| 119585 | glycosyltransferase 8 domain containing 1, isoform CRA_a [Homo    | 3  | 12  | metabolic process                     | 1.109 | 0.748 | 0.789 |
| 530406 | PREDICTED: tropomyosin alpha-1 chain isoform X13 [Homo sapie      | 13 | 123 | biogenesis; response to stimulus      | 1.222 | 0.747 | 0.843 |

|        |                                                                                               |    |     |                                                              |       |       |       |
|--------|-----------------------------------------------------------------------------------------------|----|-----|--------------------------------------------------------------|-------|-------|-------|
| 119612 | phosphatidylserine synthase 1, isoform CRA_b [Homo sapiens]                                   | 3  | 6   | metabolic process                                            | 0.855 | 0.747 | 0.733 |
| 194391 | unnamed protein product [Homo sapiens]                                                        | 11 | 48  | metabolic process                                            | 0.934 | 0.747 | 0.733 |
| 119610 | trafficking protein particle complex 1, isoform CRA_a [Homo sapiens]                          | 2  | 2   | cell organization and biogenesis                             | 0.874 | 0.747 | 0.889 |
| 768007 | PREDICTED: echinoderm microtubule-associated protein-like 2 isoform CRA_b [Homo sapiens]      | 4  | 11  | regulation of biological process                             | 1.053 | 0.747 | 0.761 |
| 165503 | unnamed protein product [Homo sapiens]                                                        | 2  | 3   |                                                              | 0.872 | 0.746 | 0.691 |
| 119576 | synaptobrevin-like 1, isoform CRA_c [Homo sapiens]                                            | 3  | 8   | cell organization and biogenesis                             | 1.073 | 0.746 | 0.807 |
| 119606 | calmodulin-like 5 [Homo sapiens]                                                              | 6  | 274 | cellular process; response to stimulus                       | 1.295 | 0.746 | 0.808 |
| 310900 | unnamed protein product [Homo sapiens]                                                        | 24 | 234 |                                                              | 0.980 | 0.746 | 0.782 |
| 274771 | nuclear pore membrane glycoprotein 210 precursor [Homo sapiens]                               | 25 | 112 | cellular process; response to stimulus                       | 1.028 | 0.745 | 0.797 |
| 119584 | nucleoporin 210kDa, isoform CRA_b [Homo sapiens]                                              | 25 | 108 | cellular process; response to stimulus                       | 1.023 | 0.745 | 0.784 |
| 767974 | PREDICTED: apoptotic protease-activating factor 1 isoform X4 [Homo sapiens]                   | 2  | 5   | cell organization and biogenesis                             | 0.957 | 0.745 | 0.735 |
| 166370 | KIAA0241, partial [Homo sapiens]                                                              | 4  | 6   | cellular component movement                                  | 0.974 | 0.745 | 0.747 |
| 767994 | PREDICTED: keratin, type I cytoskeletal 15 isoform X3 [Homo sapiens]                          | 13 | 129 |                                                              | 0.978 | 0.745 | 0.710 |
| 610294 | hypothetical protein, partial [Homo sapiens]                                                  | 2  | 3   | regulation of biological process                             | 0.793 | 0.745 | 0.695 |
| 674639 | Chain A, Crystal Structure Of Isg15, The Interferon-Induced Ubiquitin Ligase                  | 2  | 5   |                                                              | 0.792 | 0.744 | 0.734 |
| 704360 | Chain N, Crystal Structure Of The Ring1b/bmi1/ubch5c Prc1 Ubiquitin Ligase                    | 4  | 27  |                                                              | 1.013 | 0.744 | 0.748 |
| 119609 | phosphatidylserine receptor, isoform CRA_a [Homo sapiens]                                     | 2  | 4   | response to stimulus; cell differentiation                   | 0.854 | 0.744 | 0.666 |
| 126545 | Translocator protein (18kDa) [Homo sapiens]                                                   | 3  | 14  | cell organization and biogenesis                             | 0.881 | 0.744 | 0.785 |
| 767973 | PREDICTED: palmitoyltransferase ZDHHC17 isoform X4 [Homo sapiens]                             | 2  | 2   | cellular process; metabolic process; transport               | 0.884 | 0.744 | 0.772 |
| 119614 | ubiquitin-conjugating enzyme E2D 4 (putative), isoform CRA_d [Homo sapiens]                   | 2  | 21  | metabolic process                                            | 1.013 | 0.743 | 0.735 |
| 150043 | sodium-dependent neutral amino acid transporter type 2 truncated isoform CRA_b [Homo sapiens] | 8  | 49  | transport                                                    | 1.091 | 0.743 | 0.725 |
| 119611 | actin related protein 2/3 complex, subunit 5, 16kDa, isoform CRA_c [Homo sapiens]             | 2  | 6   | cellular process; response to stimulus; cell differentiation | 0.832 | 0.743 | 0.715 |
| 665010 | bicarbonate transporter [Homo sapiens]                                                        | 6  | 13  | homeostasis; cell differentiation                            | 0.968 | 0.742 | 0.737 |
| 119595 | ribosomal protein S21, isoform CRA_b [Homo sapiens]                                           | 3  | 22  | cellular process; response to stimulus; transport            | 1.696 | 0.741 | 0.742 |
| 614458 | phosphoenolpyruvate carboxykinase [GTP], mitochondrial isoform CRA_b [Homo sapiens]           | 25 | 164 | metabolic process                                            | 0.968 | 0.741 | 0.716 |
| 189065 | unnamed protein product [Homo sapiens]                                                        | 15 | 98  | cellular process; response to stimulus                       | 1.015 | 0.741 | 0.762 |
| 259013 | thymidylate kinase isoform 2 [Homo sapiens]                                                   | 6  | 36  | response to stimulus; cell differentiation                   | 1.204 | 0.740 | 0.787 |
| 183448 | Chain B, Crystal Structure Of Human Eukaryotic Translation Initiation Factor 4E               | 3  | 10  | regulation of biological process                             | 0.716 | 0.740 | 0.727 |
| 768003 | PREDICTED: small glutamine-rich tetratricopeptide repeat-containing protein 1 [Homo sapiens]  | 2  | 3   | regulation of biological process                             | 0.795 | 0.739 | 0.805 |
| 479395 | RTN4 protein [Homo sapiens]                                                                   | 7  | 49  | cell organization and biogenesis                             | 0.938 | 0.739 | 0.838 |
| 515869 | hsc70-interacting protein isoform 2 [Homo sapiens]                                            | 5  | 24  | regulation of biological process                             | 1.023 | 0.737 | 0.818 |
| 767955 | PREDICTED: DENN domain-containing protein 4C isoform X4 [Homo sapiens]                        | 2  | 3   | cell organization and biogenesis                             | 0.876 | 0.737 | 0.772 |
| 119592 | spermidine synthase, isoform CRA_a [Homo sapiens]                                             | 4  | 17  | metabolic process                                            | 0.957 | 0.736 | 0.792 |
| 119586 | nucleoside phosphorylase, isoform CRA_a [Homo sapiens]                                        | 10 | 45  | regulation of biological process; transport                  | 1.059 | 0.736 | 0.762 |
| 119627 | retinoblastoma binding protein 4, isoform CRA_b [Homo sapiens]                                | 8  | 36  | regulation of biological process                             | 0.979 | 0.736 | 0.811 |
| 158260 | unnamed protein product [Homo sapiens]                                                        | 2  | 12  | regulation of biological process                             | 0.964 | 0.736 | 0.784 |
| 158257 | unnamed protein product [Homo sapiens]                                                        | 4  | 10  | response to stimulus; metabolic process                      | 0.819 | 0.735 | 0.737 |
| 119605 | hCG38577, partial [Homo sapiens]                                                              | 2  | 6   |                                                              | 1.562 | 0.735 | 0.899 |
| 675082 | Chain A, Crystal Structure Of Extracellular Part Of Human Epcam                               | 3  | 5   |                                                              | 1.047 | 0.735 | 0.885 |
| 767941 | PREDICTED: BAG family molecular chaperone regulator 2 isoform CRA_b [Homo sapiens]            | 2  | 6   | regulation of biological process                             | 1.138 | 0.735 | 0.700 |

|        |                                                                    |    |     |                                     |       |       |       |
|--------|--------------------------------------------------------------------|----|-----|-------------------------------------|-------|-------|-------|
| 177297 | endonuclease III homologue 1, partial [Homo sapiens]               | 4  | 6   | ic process; response to stimulus    | 0.982 | 0.734 | 0.785 |
| 767965 | PREDICTED: rho GTPase-activating protein 1 isoform X2 [Homo sa     | 8  | 40  | al process; response to stimulus    | 1.029 | 0.732 | 0.683 |
| 767964 | PREDICTED: STE20-like serine/threonine-protein kinase isoform X    | 3  | 7   | ic process; response to stimulus    | 0.831 | 0.731 | 0.835 |
| 194385 | unnamed protein product [Homo sapiens]                             | 12 | 40  | cell organization and biogenesis    | 1.026 | 0.731 | 0.760 |
| 119600 | MYC binding protein 2, isoform CRA_c [Homo sapiens]                | 15 | 25  | cell organization and biogenesis    | 0.906 | 0.729 | 0.732 |
| 728055 | Chain C, Crystal Structure Of The T229k Mutant Of Human Gapdh      | 16 | 606 |                                     | 1.033 | 0.729 | 0.769 |
| 193785 | unnamed protein product [Homo sapiens]                             | 5  | 7   | transport                           | 1.038 | 0.729 | 0.731 |
| 767981 | PREDICTED: RNA-binding protein 25 isoform X2 [Homo sapiens]        | 3  | 18  | gical process; metabolic process    | 1.107 | 0.729 | 0.829 |
| 701851 | hypothetical protein [Homo sapiens]                                | 3  | 8   | transport; development              | 1.086 | 0.728 | 0.755 |
| 889005 | protein arginine N-methyltransferase 5 isoform b [Homo sapiens]    | 9  | 35  | logical process; cell proliferation | 0.925 | 0.728 | 0.756 |
| 203282 | Chain D, Crystal Structure Of Human Enolase 1                      | 15 | 300 | metabolic process                   | 1.062 | 0.728 | 0.800 |
| 159162 | Chain A, Solution Structure Of The Ppiase Domain Of Human Pin1     | 2  | 5   |                                     | 0.658 | 0.727 | 0.697 |
| 154313 | keratin, type I cytoskeletal 14 [Homo sapiens]                     | 22 | 227 | cell organization and biogenesis    | 0.953 | 0.727 | 0.696 |
| 119599 | debranching enzyme homolog 1 (S. cerevisiae) [Homo sapiens]        | 2  | 10  | metabolic process                   | 0.873 | 0.727 | 0.787 |
| 665505 | sorting nexin-3 isoform c [Homo sapiens]                           | 2  | 8   | ss; transport; metabolic process    | 1.265 | 0.727 | 0.860 |
| 767940 | PREDICTED: serpin B6 isoform X3 [Homo sapiens]                     | 5  | 12  | al process; response to stimulus    | 0.803 | 0.727 | 0.755 |
| 110591 | Chain A, Extended Substrate Recognition In Caspase-3 Revealed B    | 3  | 14  | metabolic process                   | 1.128 | 0.727 | 0.743 |
| 221039 | unnamed protein product [Homo sapiens]                             | 14 | 123 | cell organization and biogenesis    | 0.947 | 0.727 | 0.725 |
| 340062 | pro-ubiquitin, partial [Homo sapiens]                              | 5  | 446 | ent movement; defense response      | 1.006 | 0.726 | 0.736 |
| 478247 | Chain B, Lys6-linked Tri-ubiquitin                                 | 5  | 446 |                                     | 1.005 | 0.726 | 0.736 |
| 530412 | PREDICTED: A-kinase anchor protein 1, mitochondrial isoform X1     | 3  | 4   | al process; response to stimulus    | 0.893 | 0.726 | 0.772 |
| 661918 | Chain A, Crystal Structure Of Human Farnesyl Diphosphoate Synth    | 9  | 42  |                                     | 1.110 | 0.726 | 0.793 |
| 429836 | signal peptidase complex catalytic subunit SEC11A isoform 5 [Hor   | 3  | 17  | ; regulation of biological process  | 1.082 | 0.725 | 0.782 |
| 335545 | R33729_1, partial [Homo sapiens]                                   | 5  | 42  | e to stimulus; metabolic process    | 1.147 | 0.725 | 0.727 |
| 119575 | N-terminal asparagine amidase [Homo sapiens]                       | 3  | 6   | e to stimulus; metabolic process    | 0.811 | 0.725 | 0.722 |
| 609412 | Chain B, Crystal Structure Of Transportin-sr2, A Karyopherin Invol | 6  | 21  |                                     | 0.894 | 0.724 | 0.793 |
| 767957 | PREDICTED: phosducin-like protein isoform X1 [Homo sapiens]        | 3  | 8   | cell organization and biogenesis    | 0.988 | 0.724 | 0.758 |
| 400410 | unnamed protein product, partial [Homo sapiens]                    | 2  | 4   |                                     | 1.105 | 0.723 | 0.738 |
| 163070 | SUB1 homolog (S. cerevisiae) [Homo sapiens]                        | 3  | 23  | ic process; response to stimulus    | 1.287 | 0.723 | 0.783 |
| 120538 | TBC1 domain family, member 9B (with GRAM domain) [Homo sapi        | 4  | 7   | regulation of biological process    | 0.812 | 0.723 | 0.696 |
| 312836 | adenylate kinase 2, mitochondrial isoform c [Homo sapiens]         | 6  | 31  | metabolic process                   | 1.004 | 0.723 | 0.742 |
| 119580 | phosphatidylinositol transfer protein, beta, isoform CRA_c [Homo   | 2  | 10  | metabolic process; transport        | 1.172 | 0.723 | 0.684 |
| 104351 | unnamed protein product [Homo sapiens]                             | 3  | 5   | ; regulation of biological process  | 1.122 | 0.722 | 0.633 |
| 767962 | PREDICTED: NHL repeat-containing protein 2 isoform X1 [Homo sa     | 3  | 13  |                                     | 0.885 | 0.722 | 0.856 |
| 530405 | PREDICTED: isocitrate dehydrogenase [NAD] subunit alpha, mitoc     | 5  | 26  | metabolic process                   | 1.311 | 0.722 | 0.764 |
| 189053 | unnamed protein product [Homo sapiens]                             | 2  | 13  | cell organization and biogenesis    | 1.001 | 0.721 | 0.767 |
| 433938 | ERGIC53 [Homo sapiens]                                             | 7  | 46  | ; regulation of biological process  | 1.059 | 0.721 | 0.743 |
| 206517 | unnamed protein product, partial [Homo sapiens]                    | 3  | 18  | ; regulation of biological process  | 1.574 | 0.721 | 0.868 |
| 578801 | PREDICTED: gamma-secretase subunit APH-1A isoform X1 [Homo         | 2  | 3   | s; cellular component movement      | 1.254 | 0.721 | 0.767 |
| 230868 | Chain G, Twinning In Crystals Of Human Skeletal Muscle D-Glycer    | 6  | 171 | metabolic process                   | 1.033 | 0.721 | 0.667 |



|        |                                                                    |    |     |                                       |       |       |       |
|--------|--------------------------------------------------------------------|----|-----|---------------------------------------|-------|-------|-------|
| 194376 | unnamed protein product [Homo sapiens]                             | 5  | 16  | sis; transport; metabolic process     | 1.173 | 0.720 | 0.717 |
| 450348 | elongation factor 2 [Homo sapiens]                                 | 27 | 258 | ; regulation of biological process    | 1.095 | 0.720 | 0.791 |
| 158259 | unnamed protein product, partial [Homo sapiens]                    | 7  | 23  | metabolic process                     | 1.071 | 0.720 | 0.760 |
| 530392 | PREDICTED: 6-phosphofructo-2-kinase/fructose-2,6-bisphosphata      | 5  | 13  | metabolic process                     | 1.212 | 0.720 | 0.740 |
| 119581 | Coenzyme A synthase, isoform CRA_b [Homo sapiens]                  | 6  | 60  | metabolic process                     | 1.038 | 0.719 | 0.727 |
| 194383 | unnamed protein product [Homo sapiens]                             | 4  | 25  | cell organization and biogenesis      | 1.105 | 0.719 | 0.750 |
| 140358 | unnamed protein product [Homo sapiens]                             | 2  | 2   |                                       | 0.887 | 0.719 | 0.728 |
| 119618 | ADP-ribosylation factor-like 1, isoform CRA_c [Homo sapiens]       | 5  | 10  | us; metabolic process; transport      | 1.009 | 0.718 | 0.731 |
| 339883 | PTGES2 protein, partial [Homo sapiens]                             | 4  | 26  | n of biological process; transport    | 1.088 | 0.718 | 0.815 |
| 400413 | unnamed protein product, partial [Homo sapiens]                    | 8  | 36  |                                       | 0.912 | 0.717 | 0.770 |
| 386024 | PHP [Homo sapiens]                                                 | 7  | 53  | metabolic process                     | 0.971 | 0.717 | 0.815 |
| 221044 | unnamed protein product [Homo sapiens]                             | 7  | 15  | metabolic process                     | 1.145 | 0.717 | 0.779 |
| 119626 | E-1 enzyme, isoform CRA_c, partial [Homo sapiens]                  | 2  | 8   | metabolic process                     | 1.143 | 0.716 | 0.792 |
| 189053 | unnamed protein product [Homo sapiens]                             | 3  | 6   | metabolic process; transport          | 0.910 | 0.716 | 0.662 |
| 119570 | COX15 homolog, cytochrome c oxidase assembly protein (yeast), i    | 4  | 8   | ization and biogenesis; transport     | 0.875 | 0.715 | 0.700 |
| 119571 | hCG1998851, isoform CRA_b [Homo sapiens]                           | 2  | 3   | metabolic process                     | 1.157 | 0.714 | 0.730 |
| 678205 | unnamed protein product [Homo sapiens]                             | 3  | 18  |                                       | 1.116 | 0.714 | 0.692 |
| 110358 | laminin beta 2 chain [Homo sapiens]                                | 4  | 7   | t; cell differentiation; cell growth  | 0.771 | 0.714 | 0.651 |
| 119617 | cytokeratin type II [Homo sapiens]                                 | 14 | 171 | cell differentiation                  | 0.955 | 0.713 | 0.857 |
| 835020 | Chain A, Pi3k Alpha Lipid Kinase With Active Site Inhibitor        | 3  | 11  |                                       | 1.130 | 0.712 | 0.735 |
| 119613 | recombining binding protein suppressor of hairless (Drosophila), i | 2  | 3   | ess; cell differentiation; transport  | 0.947 | 0.712 | 0.761 |
| 768045 | PREDICTED: pyridoxal-dependent decarboxylase domain-containi       | 8  | 43  | metabolic process                     | 1.063 | 0.712 | 0.703 |
| 565541 | Chain A, The Structure Of Human Erythrocyte Nadh-Cytochrome B      | 7  | 51  | metabolic process                     | 0.960 | 0.711 | 0.740 |
| 238537 | Chain B, Human Ubiquitin-activating Enzyme 5 In Complex With A     | 3  | 7   |                                       | 0.854 | 0.711 | 0.772 |
| 339961 | Chain A, Solution Structure Of The N-Terminal Domain Of Human A    | 3  | 12  | metabolic process                     | 1.069 | 0.710 | 0.770 |
| 194385 | unnamed protein product [Homo sapiens]                             | 3  | 14  | al process; cellular homeostasis      | 1.102 | 0.710 | 0.750 |
| 119593 | family with sequence similarity 50, member A, isoform CRA_b [H     | 2  | 3   |                                       | 0.827 | 0.709 | 0.675 |
| 455797 | Chain A, Human Muscle Fructose 1,6-Bisphosphate Aldolase Com       | 21 | 318 | metabolic process                     | 1.175 | 0.708 | 0.757 |
| 328224 | alpha enolase like 1, partial [Homo sapiens]                       | 9  | 162 | metabolic process                     | 1.025 | 0.707 | 0.765 |
| 543583 | prostaglandin E synthase 3 isoform f [Homo sapiens]                | 4  | 18  | al process; response to stimulus      | 1.020 | 0.707 | 0.829 |
| 577019 | glucose-6-phosphate isomerase isoform 4 [Homo sapiens]             | 21 | 239 | ; regulation of biological process    | 0.991 | 0.707 | 0.685 |
| 478247 | Chain B, Crystal Structure Of Oxidized Hpdi (abb'xa')              | 21 | 352 |                                       | 1.161 | 0.706 | 0.772 |
| 578835 | PREDICTED: phosphatidate cytidyltransferase 2 isoform X1 [Hon      | 2  | 4   | metabolic process                     | 0.966 | 0.706 | 0.705 |
| 189067 | unnamed protein product [Homo sapiens]                             | 9  | 44  | al process; response to stimulus      | 1.082 | 0.706 | 0.708 |
| 119586 | transmembrane 9 superfamily member 1, isoform CRA_d [Homo s        | 8  | 32  | metabolic process                     | 1.009 | 0.706 | 0.707 |
| 181573 | cytokeratin 8 [Homo sapiens]                                       | 35 | 824 | sis; cell differentiation; cell death | 1.108 | 0.705 | 0.727 |
| 513891 | PTD012 [Homo sapiens]                                              | 2  | 3   | metabolic process                     | 0.943 | 0.705 | 0.523 |
| 194377 | unnamed protein product [Homo sapiens]                             | 4  | 11  | cell organization and biogenesis      | 1.387 | 0.705 | 0.657 |
| 119628 | DnaJ (Hsp40) homolog, subfamily C, member 8, isoform CRA_a [H      | 2  | 3   | metabolic process                     | 0.703 | 0.705 | 0.782 |
| 194384 | unnamed protein product [Homo sapiens]                             | 7  | 24  | ; regulation of biological process    | 1.348 | 0.704 | 0.661 |

|        |                                                                       |    |     |                                    |       |       |       |
|--------|-----------------------------------------------------------------------|----|-----|------------------------------------|-------|-------|-------|
| 611049 | heat shock protein 90Bf [Homo sapiens]                                | 2  | 9   | ic process; response to stimulus   | 1.466 | 0.703 | 0.805 |
| 767994 | PREDICTED: WW domain-binding protein 2 isoform X1 [Homo sap           | 2  | 11  | al process; response to stimulus   | 1.062 | 0.703 | 0.586 |
| 895741 | mitochondrial malate dehydrogenase 2, NAD, partial [Homo sapien       | 14 | 183 | metabolic process                  | 0.918 | 0.702 | 0.734 |
| 776714 | Chain H, Crystal Structure Of Human Ubiquitous Mitochondrial Cre      | 8  | 109 |                                    | 0.907 | 0.702 | 0.688 |
| 159286 | Solute carrier family 25 (mitochondrial carrier; adenine nucleotide   | 13 | 220 | al process; response to stimulus   | 0.916 | 0.702 | 0.714 |
| 119610 | solute carrier family 25 (mitochondrial carrier; adenine nucleotide   | 15 | 284 | ; regulation of biological process | 0.923 | 0.701 | 0.706 |
| 101210 | Chain B, Fk506 Binding Protein Mutant, Homodimeric Complex            | 2  | 63  | metabolic process                  | 0.919 | 0.700 | 0.757 |
| 151567 | Chain L, Structure Of Human Udp-glucose Dehydrogenase Comple          | 12 | 140 | metabolic process                  | 1.229 | 0.699 | 0.737 |
| 307132 | membrane glycoprotein [Homo sapiens]                                  | 9  | 47  | to stimulus; cell death; transport | 1.045 | 0.698 | 0.698 |
| 227963 | 3-oxoacyl-CoA thiolase, partial [Homo sapiens]                        | 4  | 13  | metabolic process                  | 1.001 | 0.698 | 0.762 |
| 768009 | PREDICTED: glutaminyl-peptide cyclotransferase-like protein isof      | 4  | 20  | metabolic process                  | 0.837 | 0.698 | 0.693 |
| 119627 | trafficking protein particle complex 3, isoform CRA_a [Homo sapie     | 3  | 12  | cell organization and biogenesis   | 1.019 | 0.698 | 0.745 |
| 119631 | hCG1783452, isoform CRA_a [Homo sapiens]                              | 3  | 23  |                                    | 1.522 | 0.697 | 0.769 |
| 158257 | unnamed protein product [Homo sapiens]                                | 14 | 168 | ; regulation of biological process | 0.906 | 0.697 | 0.713 |
| 620890 | itchy homolog E3 ubiquitin protein ligase variant, partial [Homo sa   | 5  | 11  | ; response; response to stimulus   | 0.909 | 0.697 | 0.707 |
| 530373 | PREDICTED: protein RFT1 homolog isoform X4 [Homo sapiens]             | 6  | 10  | cell organization and biogenesis   | 0.994 | 0.696 | 0.745 |
| 262367 | Chain A, Catalytic Domain Of Uch37                                    | 4  | 17  | metabolic process                  | 1.212 | 0.696 | 0.754 |
| 270346 | Chain B, Crystal Structure Of Human Insulin-Degrading Enzyme In       | 10 | 17  | metabolic process                  | 1.045 | 0.696 | 0.813 |
| 194386 | unnamed protein product [Homo sapiens]                                | 4  | 11  | metabolic process; development     | 1.207 | 0.695 | 0.674 |
| 119593 | von Hippel-Lindau binding protein 1, isoform CRA_a [Homo sapien       | 2  | 17  | cell organization and biogenesis   | 0.876 | 0.695 | 0.669 |
| 119609 | solute carrier family 9 (sodium/hydrogen exchanger), member 3 re      | 6  | 61  | homeostasis; cell differentiation  | 1.018 | 0.694 | 0.744 |
| 104390 | unnamed protein product [Homo sapiens]                                | 3  | 4   | ; regulation of biological process | 0.903 | 0.694 | 0.759 |
| 280948 | cytochrome c oxidase subunit IV, partial [Homo sapiens]               | 3  | 11  |                                    | 1.139 | 0.694 | 0.669 |
| 119601 | zinc binding alcohol dehydrogenase, domain containing 1, isoform      | 4  | 12  | metabolic process                  | 1.037 | 0.693 | 0.681 |
| 217545 | unnamed protein product [Homo sapiens]                                | 13 | 124 | cell organization and biogenesis   | 1.068 | 0.692 | 0.681 |
| 189054 | unnamed protein product [Homo sapiens]                                | 3  | 19  | biogenesis; response to stimulus   | 1.063 | 0.691 | 0.714 |
| 159162 | Chain A, Human Protein Disulfide Isomerase, Nmr, 40 Structures        | 6  | 76  | ; regulation of biological process | 1.456 | 0.691 | 0.775 |
| 620889 | Insulin-like growth factor 2 receptor variant, partial [Homo sapiens] | 8  | 17  | al process; response to stimulus   | 0.884 | 0.691 | 0.696 |
| 145580 | Chain B, Crystal Structure Of Human 3-Hydroxy-3-Methylglutaryl C      | 8  | 29  | metabolic process                  | 1.221 | 0.691 | 0.695 |
| 194381 | unnamed protein product [Homo sapiens]                                | 2  | 4   | transport                          | 1.107 | 0.690 | 0.714 |
| 481457 | RER1 [Homo sapiens]                                                   | 3  | 5   | ; regulation of biological process | 0.803 | 0.688 | 0.688 |
| 194384 | unnamed protein product [Homo sapiens]                                | 4  | 12  | ; regulation of biological process | 0.816 | 0.688 | 0.734 |
| 164183 | vacuolar protein sorting-associated protein 26B [Homo sapiens]        | 4  | 10  | transport                          | 0.977 | 0.688 | 0.642 |
| 767935 | PREDICTED: alpha-mannosidase 2 isoform X1 [Homo sapiens]              | 7  | 18  | ; regulation of biological process | 1.231 | 0.687 | 0.691 |
| 316901 | putative GTP-binding protein, partial [Homo sapiens]                  | 2  | 3   | ; regulation of biological process | 1.322 | 0.687 | 0.755 |
| 428228 | migration and invasion enhancer 1 [Homo sapiens]                      | 3  | 13  | al process; cellular homeostasis   | 1.118 | 0.686 | 0.872 |
| 219037 | carboxypeptidase D [Homo sapiens]                                     | 13 | 40  | metabolic process                  | 0.945 | 0.686 | 0.756 |
| 119591 | ATP-binding cassette, sub-family B (MDR/TAP), member 6, isoform       | 10 | 31  | ; transport; cellular homeostasis  | 0.958 | 0.685 | 0.678 |
| 338756 | ANP32A protein, partial [Homo sapiens]                                | 3  | 43  | ; transport; response to stimulus  | 1.128 | 0.685 | 0.832 |
| 371823 | COG7 [Homo sapiens]                                                   | 2  | 11  | ; regulation of biological process | 0.976 | 0.683 | 0.710 |

|        |                                                                              |    |     |                                     |       |       |       |
|--------|------------------------------------------------------------------------------|----|-----|-------------------------------------|-------|-------|-------|
| 194387 | unnamed protein product [Homo sapiens]                                       | 3  | 4   | cell organization and biogenesis    | 0.877 | 0.683 | 0.687 |
| 119598 | mitofusin 1, isoform CRA_d [Homo sapiens]                                    | 2  | 3   | cell organization and biogenesis    | 1.065 | 0.683 | 0.721 |
| 189066 | unnamed protein product [Homo sapiens]                                       | 8  | 87  | s; cellular component movement      | 1.208 | 0.682 | 0.722 |
| 543040 | glyceraldehyde-3-phosphate dehydrogenase, partial [Homo sapiens]             | 5  | 169 | cell death; response to stimulus    | 0.869 | 0.682 | 0.700 |
| 214829 | ADP-ribosylation factor GTPase-activating protein 3 isoform 2 [Homo sapiens] | 4  | 11  | ; regulation of biological process  | 1.006 | 0.681 | 0.662 |
| 119628 | hCG18930 [Homo sapiens]                                                      | 4  | 14  | metabolic process                   | 1.152 | 0.681 | 0.708 |
| 280710 | unnamed protein product [Homo sapiens]                                       | 4  | 44  | gical process; defense response     | 0.762 | 0.681 | 0.647 |
| 100472 | KIAA1592 protein, partial [Homo sapiens]                                     | 2  | 4   | transport; response to stimulus     | 1.035 | 0.681 | 0.742 |
| 767966 | PREDICTED: phosphatidylserine synthase 2 isoform X2 [Homo sapiens]           | 3  | 4   | metabolic process                   | 0.880 | 0.679 | 0.699 |
| 182979 | glyceraldehyde 3-phosphate dehydrogenase, partial [Homo sapiens]             | 2  | 57  | cell death; response to stimulus    | 1.161 | 0.679 | 0.485 |
| 304445 | Chain A, Complex Of Human Dihydroorotate Dehydrogenase With                  | 4  | 8   | metabolic process                   | 1.051 | 0.678 | 0.634 |
| 628976 | calreticulin precursor variant, partial [Homo sapiens]                       | 10 | 116 | e to stimulus; cell differentiation | 1.183 | 0.678 | 0.762 |
| 767968 | PREDICTED: RING finger protein 121 isoform X2 [Homo sapiens]                 | 2  | 3   | al process; response to stimulus    | 0.852 | 0.677 | 0.733 |
| 194387 | unnamed protein product [Homo sapiens]                                       | 2  | 6   | ; response to stimulus; transport   | 1.095 | 0.677 | 0.724 |
| 767957 | PREDICTED: osteoclast-stimulating factor 1 isoform X3 [Homo sapiens]         | 2  | 5   | al process; response to stimulus    | 0.849 | 0.677 | 0.758 |
| 325533 | Chain A, Crystal Structure Of The Globular Domain Of Human Calr              | 10 | 109 |                                     | 1.145 | 0.677 | 0.754 |
| 113812 | MYL6 protein, partial [Homo sapiens]                                         | 5  | 30  | s; cellular component movement      | 1.275 | 0.677 | 0.664 |
| 119605 | dodecenoyl-Coenzyme A delta isomerase (3,2 trans-enoyl-Coenzyme A)           | 5  | 36  | metabolic process                   | 0.991 | 0.677 | 0.756 |
| 189582 | zinc finger protein [Homo sapiens]                                           | 2  | 2   | ss; metabolic process; cell death   | 0.933 | 0.676 | 0.659 |
| 578832 | PREDICTED: dymeclin isoform X11 [Homo sapiens]                               | 2  | 7   | cell organization and biogenesis    | 0.780 | 0.676 | 0.670 |
| 767970 | PREDICTED: m7GpppX diphosphatase isoform X2 [Homo sapiens]                   | 4  | 16  | ; regulation of biological process  | 1.151 | 0.675 | 0.688 |
| 158254 | unnamed protein product [Homo sapiens]                                       | 2  | 4   | metabolic process                   | 0.731 | 0.675 | 0.766 |
| 182759 | Chain B, Recombinant Cyclophilin A From Human T Cell                         | 7  | 99  | metabolic process                   | 1.096 | 0.672 | 0.657 |
| 119615 | leucine rich repeat containing 59, isoform CRA_a [Homo sapiens]              | 2  | 10  |                                     | 0.690 | 0.671 | 0.711 |
| 215955 | Lectin, mannose-binding, 1 [Homo sapiens]                                    | 7  | 49  | ; regulation of biological process  | 1.045 | 0.670 | 0.715 |
| 189053 | unnamed protein product [Homo sapiens]                                       | 5  | 15  | transport; cell communication       | 1.222 | 0.669 | 0.672 |
| 119572 | KDEL (Lys-Asp-Glu-Leu) endoplasmic reticulum protein retention signal        | 2  | 18  | transport                           | 0.914 | 0.668 | 0.742 |
| 530400 | PREDICTED: tRNA (guanine-N(7))-methyltransferase isoform X1 [Homo sapiens]   | 2  | 6   | metabolic process                   | 0.959 | 0.668 | 0.657 |
| 573952 | TAP2 protein, partial [Homo sapiens]                                         | 2  | 3   | sis; transport; defense response    | 1.084 | 0.667 | 0.634 |
| 388603 | Chain A, Oxidoreductase Fragment Of Human Qsox1                              | 3  | 5   |                                     | 0.964 | 0.666 | 0.612 |
| 189065 | unnamed protein product [Homo sapiens]                                       | 2  | 6   | ; regulation of biological process  | 1.824 | 0.665 | 0.801 |
| 713880 | hepatopoietin PCn127 [Homo sapiens]                                          | 2  | 20  |                                     | 1.074 | 0.665 | 0.699 |
| 530376 | PREDICTED: transmembrane protein 33 isoform X1 [Homo sapiens]                | 5  | 28  | cell organization and biogenesis    | 0.947 | 0.663 | 0.664 |
| 574451 | Chain D, The Structure Of Cc1-ih In Human Stim1.                             | 2  | 5   |                                     | 1.104 | 0.663 | 0.669 |
| 846592 | unnamed protein product, partial [Homo sapiens]                              | 10 | 35  |                                     | 1.315 | 0.662 | 0.688 |
| 189053 | unnamed protein product [Homo sapiens]                                       | 2  | 5   | metabolic process; transport        | 1.074 | 0.662 | 0.719 |
| 315237 | DnaJ protein, partial [Homo sapiens]                                         | 3  | 6   | al process; response to stimulus    | 0.918 | 0.662 | 0.629 |
| 628220 | unknown [Homo sapiens]                                                       | 4  | 13  | cell death                          | 0.889 | 0.662 | 0.725 |
| 749197 | Chain F, Crystal Structure Of Bag6-ubl4a Dimerization Domain                 | 2  | 6   |                                     | 1.090 | 0.661 | 0.728 |
| 119616 | golgi transport 1 homolog B (S. cerevisiae), isoform CRA_a [Homo sapiens]    | 2  | 16  | ; response to stimulus; transport   | 0.800 | 0.661 | 0.786 |

|        |                                                                                      |    |     |                                                      |       |       |       |
|--------|--------------------------------------------------------------------------------------|----|-----|------------------------------------------------------|-------|-------|-------|
| 578822 | PREDICTED: tyrosine-protein phosphatase non-receptor type 6 isoform 1 [Homo sapiens] | 3  | 7   | cellular component movement                          | 1.051 | 0.661 | 0.721 |
| 119588 | GPI-anchored membrane protein 1, isoform CRA_c [Homo sapiens]                        | 5  | 10  | regulation of biological process                     | 1.201 | 0.661 | 0.758 |
| 525458 | hypothetical protein, partial [Homo sapiens]                                         | 3  | 8   | cellular process; response to stimulus               | 1.042 | 0.660 | 0.748 |
| 767901 | PREDICTED: CAAX prenyl protease 1 homolog isoform X1 [Homo sapiens]                  | 8  | 24  | cell organization and biogenesis                     | 1.062 | 0.660 | 0.677 |
| 221045 | unnamed protein product [Homo sapiens]                                               | 2  | 4   | cellular biogenesis; metabolic process               | 0.780 | 0.660 | 0.656 |
| 193787 | unnamed protein product [Homo sapiens]                                               | 5  | 8   | metabolic process; transport                         | 1.001 | 0.659 | 0.639 |
| 311641 | unnamed protein product [Homo sapiens]                                               | 6  | 27  |                                                      | 1.035 | 0.658 | 0.768 |
| 297787 | Chain A, Solution Structure Of The Leucine Rich Repeat Of Human p180                 | 2  | 22  |                                                      | 1.212 | 0.657 | 0.809 |
| 375372 | Acetoacetyl-CoA synthetase [Homo sapiens]                                            | 5  | 21  | cellular differentiation; cellular homeostasis       | 0.898 | 0.656 | 0.637 |
| 662494 | hypothetical protein, partial [Homo sapiens]                                         | 5  | 29  | regulation of biological process                     | 1.139 | 0.656 | 0.735 |
| 31746  | glutathione-insulin transhydrogenase (216 AA), partial [Homo sapiens]                | 8  | 52  | regulation of biological process                     | 1.562 | 0.656 | 0.705 |
| 193785 | unnamed protein product [Homo sapiens]                                               | 2  | 6   | metabolic process                                    | 1.012 | 0.656 | 0.696 |
| 509492 | hHa8 protein, partial [Homo sapiens]                                                 | 2  | 18  |                                                      | 0.858 | 0.656 | 0.655 |
| 575403 | Chain A, Crystal Structure Of G Protein-coupled Receptor Kinase 2                    | 5  | 15  |                                                      | 1.018 | 0.655 | 0.645 |
| 767934 | PREDICTED: pachytene checkpoint protein 2 homolog isoform X1                         | 5  | 25  | regulation of biological process                     | 1.054 | 0.655 | 0.718 |
| 450697 | solute carrier family 12 member 2 isoform 1 [Homo sapiens]                           | 5  | 15  | regulation of biological process                     | 0.986 | 0.654 | 0.591 |
| 209870 | Chain B, Crystal Structure Of The Mammalian Copii-coat Protein S                     | 10 | 43  | transport                                            | 1.067 | 0.653 | 0.672 |
| 119618 | KIAA0152, isoform CRA_c [Homo sapiens]                                               | 6  | 43  | metabolic process                                    | 1.148 | 0.653 | 0.675 |
| 109157 | Chain H, X-Ray Crystal Structure Of Ngt-Bound Hexa                                   | 5  | 15  | metabolic process                                    | 0.946 | 0.653 | 0.628 |
| 119627 | tumor-associated calcium signal transducer 2 [Homo sapiens]                          | 2  | 11  | response to stimulus; cell proliferation             | 1.366 | 0.651 | 0.676 |
| 530404 | PREDICTED: AP-1 complex subunit gamma-like 2 isoform X6 [Homo sapiens]               | 7  | 18  | cell organization and biogenesis                     | 0.919 | 0.651 | 0.693 |
| 119626 | mannosidase, beta A, lysosomal [Homo sapiens]                                        | 5  | 13  | metabolic process                                    | 0.861 | 0.651 | 0.670 |
| 194378 | unnamed protein product [Homo sapiens]                                               | 11 | 32  | cellular process; cell communication                 | 1.138 | 0.650 | 0.666 |
| 338221 | p180/ribosome receptor [Homo sapiens]                                                | 15 | 92  | cellular process; metabolic process; transport       | 0.947 | 0.650 | 0.639 |
| 767936 | PREDICTED: phosphatidylinositol 3-kinase regulatory subunit alpha                    | 4  | 15  | cellular component movement; transport               | 1.130 | 0.649 | 0.693 |
| 767929 | PREDICTED: peroxisomal acyl-coenzyme A oxidase 3 isoform X4 [Homo sapiens]           | 4  | 9   | metabolic process                                    | 1.093 | 0.648 | 0.674 |
| 119594 | synovial apoptosis inhibitor 1, synoviolin, isoform CRA_b [Homo sapiens]             | 2  | 11  | response to stimulus; transport                      | 0.849 | 0.646 | 0.626 |
| 514764 | hypothetical protein [Homo sapiens]                                                  | 2  | 3   | cell division; defense response                      | 1.058 | 0.645 | 0.784 |
| 119583 | neural precursor cell expressed, developmentally down-regulated                      | 5  | 24  | cellular homeostasis; response to stimulus           | 0.938 | 0.644 | 0.644 |
| 109157 | Chain B, Crystal Structure Of Human Sco1 Complexed With Nickel                       | 3  | 17  | metabolic process                                    | 1.076 | 0.642 | 0.815 |
| 119606 | hydroxyacylglutathione hydrolase, isoform CRA_a [Homo sapiens]                       | 2  | 5   | metabolic process                                    | 1.015 | 0.642 | 0.718 |
| 221039 | unnamed protein product [Homo sapiens]                                               | 8  | 34  | cellular process; response to stimulus               | 0.976 | 0.641 | 0.599 |
| 767963 | PREDICTED: mini-chromosome maintenance complex-binding protein                       | 6  | 16  | cellular proliferation and biogenesis; cell division | 0.951 | 0.638 | 0.585 |
| 402256 | RAB13 protein, partial [Homo sapiens]                                                | 5  | 38  | cellular process; cellular component movement        | 1.063 | 0.635 | 0.589 |
| 735362 | Chain A, The 1.58a Crystal Structure Of Human Coproporphyrinogen III Synthase        | 4  | 14  | metabolic process                                    | 1.369 | 0.635 | 0.734 |
| 157836 | Chain A, Crystal Structure Of Human Sdr Family Member 1                              | 3  | 7   | metabolic process                                    | 0.886 | 0.635 | 0.640 |
| 189053 | unnamed protein product [Homo sapiens]                                               | 9  | 85  | transport                                            | 1.106 | 0.633 | 0.696 |
| 119617 | dermcidin [Homo sapiens]                                                             | 2  | 4   | defense response; response to stimulus               | 0.728 | 0.633 | 1.150 |
| 30311  | cytokeratin 18 (424 AA), partial [Homo sapiens]                                      | 24 | 680 | cellular biogenesis; transport; cell death           | 0.939 | 0.632 | 0.612 |
| 119583 | kinesin family member 13B, isoform CRA_a [Homo sapiens]                              | 13 | 29  | response to stimulus; metabolic process              | 1.137 | 0.632 | 0.694 |



|        |                                                                                           |    |     |                                                    |       |       |       |
|--------|-------------------------------------------------------------------------------------------|----|-----|----------------------------------------------------|-------|-------|-------|
| 281306 | Chain B, Crystal Structure Of The Human Mgc45594 Gene Product                             | 3  | 7   | metabolic process                                  | 1.049 | 0.629 | 0.673 |
| 767931 | PREDICTED: cystine/glutamate transporter isoform X6 [Homo sapiens]                        | 2  | 3   | ion transport; cell movement; cell differentiation | 0.972 | 0.628 | 0.671 |
| 767977 | PREDICTED: high mobility group protein B1 isoform X2 [Homo sapiens]                       | 3  | 4   | cell death; cellular homeostasis                   | 1.323 | 0.627 | 0.802 |
| 400419 | unnamed protein product, partial [Homo sapiens]                                           | 3  | 15  |                                                    | 0.936 | 0.627 | 0.702 |
| 597960 | Chain B, Crystal Structure Of Se-met Hn33/tusc3                                           | 3  | 12  |                                                    | 1.001 | 0.627 | 0.683 |
| 201476 | ADP-ribosylation factor-like protein 2 [Homo sapiens]                                     | 2  | 15  | cellular process; response to stimulus             | 1.461 | 0.626 | 0.685 |
| 119568 | acetyl-Coenzyme A acetyltransferase 2 (acetoacetyl Coenzyme A transferase) [Homo sapiens] | 5  | 22  | metabolic process                                  | 1.031 | 0.625 | 0.670 |
| 189053 | unnamed protein product [Homo sapiens]                                                    | 2  | 3   | cell organization and biogenesis                   | 0.750 | 0.625 | 0.687 |
| 757657 | Chain B, Crystal Structure Of The Cyclophilin_ring Domain Of Human Cyclophilin B          | 2  | 4   | metabolic process                                  | 0.846 | 0.624 | 0.600 |
| 728055 | Chain B, Crystal Structure Of Human Insulin Regulated Amino Peptidase                     | 2  | 4   |                                                    | 0.866 | 0.624 | 0.621 |
| 525342 | acyl-protein thioesterase 1 isoform 6 [Homo sapiens]                                      | 5  | 32  | regulation of biological process                   | 0.851 | 0.621 | 0.673 |
| 119569 | solute carrier family 17 (anion/sugar transporter), member 5, isoform 1 [Homo sapiens]    | 2  | 5   | metabolic process; transport                       | 0.912 | 0.620 | 0.687 |
| 767958 | PREDICTED: actin-related protein 2/3 complex subunit 5-like protein 1 [Homo sapiens]      | 3  | 7   | regulation of biological process                   | 0.824 | 0.619 | 0.615 |
| 189055 | unnamed protein product [Homo sapiens]                                                    | 33 | 644 | cell biogenesis; cell differentiation              | 1.028 | 0.619 | 0.609 |
| 530410 | PREDICTED: nucleoredoxin isoform X3 [Homo sapiens]                                        | 4  | 12  | cell differentiation; metabolic process            | 0.735 | 0.616 | 0.651 |
| 913349 | squalene synthase [Homo sapiens]                                                          | 8  | 47  | metabolic process                                  | 1.130 | 0.616 | 0.617 |
| 555943 | heme oxygenase 2 isoform c [Homo sapiens]                                                 | 4  | 9   | cellular homeostasis; transport                    | 0.770 | 0.615 | 0.706 |
| 194386 | unnamed protein product [Homo sapiens]                                                    | 7  | 33  | cell communication; response to stimulus           | 1.109 | 0.615 | 0.629 |
| 307066 | inosine-5'-monophosphate dehydrogenase (EC 1.1.1.205) [Homo sapiens]                      | 8  | 47  | cell biogenesis; response to stimulus              | 0.948 | 0.613 | 0.619 |
| 119629 | WD repeat domain 4, isoform CRA_a [Homo sapiens]                                          | 2  | 5   | metabolic process                                  | 1.044 | 0.613 | 0.608 |
| 119568 | fucosidase, alpha-L-2, plasma [Homo sapiens]                                              | 3  | 7   | regulation of biological process                   | 0.861 | 0.612 | 0.653 |
| 375722 | RNA (guanine-9-) methyltransferase domain containing 1 [Homo sapiens]                     | 2  | 3   | cell biogenesis; metabolic process                 | 1.405 | 0.612 | 0.738 |
| 918760 | hypothetical protein, similar to (AAF46469.1) CG12121 predicted protein [Homo sapiens]    | 4  | 8   |                                                    | 0.970 | 0.612 | 0.684 |
| 295987 | synaptogyrin 2, partial [Homo sapiens]                                                    | 4  | 16  |                                                    | 1.000 | 0.612 | 0.633 |
| 767992 | PREDICTED: phosphatidylinositol transfer protein alpha isoform 1 [Homo sapiens]           | 2  | 7   | cellular component movement                        | 1.244 | 0.612 | 0.719 |
| 512125 | Chain B, Protease-induced Heterodimer Of Human Triosephosphate Isomerase                  | 14 | 120 |                                                    | 1.140 | 0.612 | 0.625 |
| 753534 | Chain B, Crystal Structure Of A Single Mutant (n71d) Of Triosephosphate Isomerase         | 14 | 120 |                                                    | 1.140 | 0.612 | 0.628 |
| 530384 | PREDICTED: MAGUK p55 subfamily member 6 isoform X2 [Homo sapiens]                         | 3  | 7   | cell organization and biogenesis                   | 0.873 | 0.612 | 0.685 |
| 119586 | farnesyl-diphosphate farnesyltransferase 1, isoform CRA_a [Homo sapiens]                  | 8  | 49  | metabolic process                                  | 1.130 | 0.609 | 0.619 |
| 158255 | unnamed protein product [Homo sapiens]                                                    | 9  | 84  | cell differentiation; cellular homeostasis         | 1.014 | 0.609 | 0.603 |
| 119568 | 5'-nucleotidase domain containing 1, isoform CRA_a [Homo sapiens]                         | 2  | 4   | metabolic process                                  | 1.076 | 0.608 | 0.599 |
| 767908 | PREDICTED: nicastrin isoform X2 [Homo sapiens]                                            | 11 | 57  | cell biogenesis; cell proliferation                | 0.978 | 0.608 | 0.624 |
| 194384 | unnamed protein product [Homo sapiens]                                                    | 6  | 13  | cell organization and biogenesis                   | 1.031 | 0.604 | 0.607 |
| 173914 | HAT1 protein [Homo sapiens]                                                               | 3  | 5   | cellular process; response to stimulus             | 1.244 | 0.603 | 0.648 |
| 157830 | Chain A, Structure Of M2bp Scavenger Receptor Cysteine-rich Domain                        | 2  | 4   |                                                    | 1.041 | 0.603 | 0.588 |
| 150804 | PNPLA2 protein, partial [Homo sapiens]                                                    | 2  | 5   | cell organization and biogenesis                   | 1.107 | 0.602 | 0.550 |
| 767994 | PREDICTED: fructose-bisphosphate aldolase C isoform X1 [Homo sapiens]                     | 16 | 249 | cell organization and biogenesis                   | 1.079 | 0.602 | 0.611 |
| 767990 | PREDICTED: large neutral amino acids transporter small subunit 1 [Homo sapiens]           | 2  | 6   | ion transport; cellular component movement         | 0.799 | 0.600 | 0.567 |
| 119609 | nucleolar protein 11, isoform CRA_b [Homo sapiens]                                        | 3  | 6   | regulation of biological process                   | 1.112 | 0.600 | 0.673 |
| 193783 | unnamed protein product [Homo sapiens]                                                    | 3  | 6   | metabolic process                                  | 1.001 | 0.600 | 0.616 |

|        |                                                                                              |    |     |                                     |       |       |       |
|--------|----------------------------------------------------------------------------------------------|----|-----|-------------------------------------|-------|-------|-------|
| 194376 | unnamed protein product [Homo sapiens]                                                       | 8  | 17  | cell organization and biogenesis    | 0.964 | 0.599 | 0.630 |
| 299657 | glucosyltransferase, partial [Homo sapiens]                                                  | 2  | 4   | metabolic process                   | 1.056 | 0.599 | 0.629 |
| 281932 | unnamed protein product, partial [Homo sapiens]                                              | 3  | 15  | metabolic process                   | 1.147 | 0.597 | 0.751 |
| 530360 | PREDICTED: solute carrier family 25 member 33 isoform X2 [Homo sapiens]                      | 2  | 3   | ; transport; response to stimulus   | 0.829 | 0.596 | 0.608 |
| 663922 | NME1-NME2 protein [Homo sapiens]                                                             | 12 | 98  | metabolic process                   | 1.021 | 0.595 | 0.594 |
| 221045 | unnamed protein product [Homo sapiens]                                                       | 2  | 6   | n; cellular component movement      | 0.871 | 0.595 | 0.582 |
| 158259 | unnamed protein product [Homo sapiens]                                                       | 4  | 25  | s; cellular component movement      | 1.237 | 0.594 | 0.877 |
| 149242 | Chain A, Structure Of The Calcineurin-Nfat Complex                                           | 6  | 40  |                                     | 1.243 | 0.594 | 0.632 |
| 157834 | Chain A, Human Glutathione Reductase In Complex With A Xanthine Oxidase                      | 13 | 164 | gical process; metabolic process    | 1.154 | 0.594 | 0.577 |
| 189053 | unnamed protein product [Homo sapiens]                                                       | 2  | 10  | metabolic process; transport        | 1.225 | 0.593 | 0.723 |
| 194379 | unnamed protein product [Homo sapiens]                                                       | 7  | 29  | ; regulation of biological process  | 1.049 | 0.592 | 0.605 |
| 119619 | all-trans-13,14-dihydroretinol saturase, isoform CRA_c [Homo sapiens]                        | 7  | 20  | metabolic process                   | 1.029 | 0.589 | 0.604 |
| 194391 | unnamed protein product [Homo sapiens]                                                       | 4  | 16  | metabolic process; reproduction     | 1.091 | 0.589 | 0.661 |
| 767963 | PREDICTED: serine/threonine-protein phosphatase 2B catalytic subunit                         | 4  | 22  | n; defense response; cell growth    | 1.252 | 0.585 | 0.620 |
| 119630 | hCG22457, isoform CRA_b [Homo sapiens]                                                       | 2  | 5   | regulation of biological process    | 1.009 | 0.584 | 0.600 |
| 194385 | unnamed protein product [Homo sapiens]                                                       | 5  | 15  | ; regulation of biological process  | 1.189 | 0.584 | 0.615 |
| 194390 | unnamed protein product [Homo sapiens]                                                       | 6  | 24  | metabolic process                   | 0.938 | 0.584 | 0.542 |
| 217302 | Chain B, D92n,D94n Double Point Mutant Of Human Nuclear Transport Factor 2                   | 2  | 5   | transport                           | 1.461 | 0.584 | 0.824 |
| 221044 | unnamed protein product [Homo sapiens]                                                       | 3  | 6   | ; regulation of biological process  | 1.036 | 0.583 | 0.533 |
| 119609 | calcium activated nucleotidase 1, isoform CRA_a [Homo sapiens]                               | 3  | 5   | e to stimulus; metabolic process    | 1.034 | 0.582 | 0.631 |
| 940376 | Chain G, The Crystal Structure Of The Gst-like Domains Complex Of Gamma-Gluutamyltransferase | 3  | 10  |                                     | 1.211 | 0.581 | 0.653 |
| 414744 | unknown [Homo sapiens]                                                                       | 3  | 26  | ; regulation of biological process  | 1.247 | 0.580 | 0.652 |
| 119570 | ADP-ribosylation factor-like 3, partial [Homo sapiens]                                       | 4  | 12  | s; cellular component movement      | 0.850 | 0.578 | 0.658 |
| 767932 | PREDICTED: calcium/calmodulin-dependent protein kinase type II                               | 2  | 3   | tion and biogenesis; cell growth    | 0.885 | 0.577 | 0.571 |
| 189053 | unnamed protein product [Homo sapiens]                                                       | 4  | 11  | al process; response to stimulus    | 1.118 | 0.575 | 0.590 |
| 119581 | basigin (Ok blood group), isoform CRA_e [Homo sapiens]                                       | 5  | 29  | component movement; transport       | 1.021 | 0.575 | 0.621 |
| 119579 | thioredoxin domain containing 4 (endoplasmic reticulum), isoform CRA_a [Homo sapiens]        | 5  | 35  | ; regulation of biological process  | 1.097 | 0.572 | 0.639 |
| 119628 | argininosuccinate lyase, isoform CRA_b [Homo sapiens]                                        | 6  | 29  | cell organization and biogenesis    | 1.007 | 0.572 | 0.530 |
| 189067 | unnamed protein product [Homo sapiens]                                                       | 2  | 2   | ; regulation of biological process  | 0.979 | 0.572 | 0.576 |
| 396446 | DHRS2 protein, partial [Homo sapiens]                                                        | 14 | 277 | e to stimulus; cell differentiation | 0.974 | 0.567 | 0.534 |
| 221040 | unnamed protein product [Homo sapiens]                                                       | 3  | 9   | metabolic process                   | 0.843 | 0.564 | 0.541 |
| 627022 | unknown [Homo sapiens]                                                                       | 7  | 41  | al process; response to stimulus    | 0.912 | 0.561 | 0.513 |
| 133030 | Mn-superoxiddismutase [Homo sapiens]                                                         | 3  | 5   |                                     | 1.160 | 0.558 | 0.718 |
| 735359 | Chain A, C Domain Of Human Cyclophilin-33(Hcyp33)                                            | 2  | 2   | metabolic process                   | 1.032 | 0.556 | 0.491 |
| 119610 | dicarbonyl/L-xylulose reductase, isoform CRA_a [Homo sapiens]                                | 9  | 120 | cell organization and biogenesis    | 0.869 | 0.555 | 0.561 |
| 300650 | unnamed protein product [Homo sapiens]                                                       | 2  | 6   |                                     | 1.043 | 0.540 | 0.652 |
| 159289 | Unknown (protein for IMAGE:3906970), partial [Homo sapiens]                                  | 2  | 7   | e to stimulus; metabolic process    | 1.107 | 0.538 | 0.516 |
| 407158 | placental protein 23 [Homo sapiens]                                                          | 6  | 26  | cell organization and biogenesis    | 1.141 | 0.538 | 0.552 |
| 119581 | phosphatidic acid phosphatase type 2C, isoform CRA_c [Homo sapiens]                          | 4  | 24  | al process; response to stimulus    | 1.027 | 0.537 | 0.550 |
| 525456 | hypothetical protein, partial [Homo sapiens]                                                 | 2  | 3   | regulation of biological process    | 0.929 | 0.536 | 0.498 |

|        |                                                                       |    |     |                                    |       |       |       |
|--------|-----------------------------------------------------------------------|----|-----|------------------------------------|-------|-------|-------|
| 119573 | S100 calcium binding protein A11 (calgizzarin) [Homo sapiens]         | 3  | 38  | al process; response to stimulus   | 0.955 | 0.535 | 0.560 |
| 530366 | PREDICTED: lamin-B receptor isoform X3 [Homo sapiens]                 | 5  | 35  | metabolic process                  | 1.069 | 0.532 | 0.496 |
| 530372 | PREDICTED: 6-phosphofructo-2-kinase/fructose-2,6-bisphosphata         | 3  | 10  | metabolic process                  | 1.219 | 0.531 | 0.588 |
| 768013 | PREDICTED: monoacylglycerol lipase ABHD12 isoform X2 [Homo s          | 6  | 25  | oagulation; response to stimulus   | 1.029 | 0.531 | 0.568 |
| 217397 | hypothetical protein, partial [Homo sapiens]                          | 6  | 15  | ; regulation of biological process | 1.121 | 0.530 | 0.482 |
| 767943 | PREDICTED: probable lysosomal cobalamin transporter isoform X         | 2  | 6   | ; regulation of biological process | 0.811 | 0.528 | 0.616 |
| 119615 | UDP-galactose-4-epimerase, isoform CRA_a [Homo sapiens]               | 7  | 27  | metabolic process                  | 1.124 | 0.526 | 0.596 |
| 386869 | P2X purinoceptor 4 isoform 4 [Homo sapiens]                           | 2  | 4   | cell organization and biogenesis   | 0.886 | 0.524 | 0.536 |
| 119593 | hCG2002525, isoform CRA_c [Homo sapiens]                              | 3  | 7   |                                    | 1.104 | 0.522 | 0.467 |
| 400409 | unnamed protein product, partial [Homo sapiens]                       | 2  | 8   |                                    | 1.015 | 0.520 | 0.600 |
| 194382 | unnamed protein product [Homo sapiens]                                | 16 | 84  | n of biological process; transport | 1.021 | 0.518 | 0.525 |
| 194387 | unnamed protein product [Homo sapiens]                                | 7  | 20  |                                    | 1.054 | 0.516 | 0.588 |
| 158256 | unnamed protein product [Homo sapiens]                                | 3  | 15  | transport; metabolic process       | 1.441 | 0.515 | 0.513 |
| 119589 | tripartite motif-containing 3, isoform CRA_f, partial [Homo sapiens]  | 2  | 12  | transport; metabolic process       | 1.193 | 0.514 | 0.561 |
| 119594 | solute carrier family 3 (activators of dibasic and neutral amino acid | 15 | 65  | s; cellular component movement     | 1.114 | 0.512 | 0.545 |
| 193785 | unnamed protein product [Homo sapiens]                                | 9  | 42  | n of biological process; transport | 1.015 | 0.507 | 0.499 |
| 187936 | UDP-N-acetylhexosamine pyrophosphorylase-like protein 1 [Homo         | 3  | 7   | metabolic process                  | 1.211 | 0.505 | 0.517 |
| 361129 | Chain B, Solution Structure Of The Dimerization Domain Of Human       | 3  | 21  | metabolic process                  | 1.039 | 0.500 | 0.539 |
| 304445 | Chain A, Crystal Structure Of Human H Ferritin E140a Mutant           | 6  | 37  | cellular homeostasis               | 1.013 | 0.497 | 0.582 |
| 557878 | RNA 3'-terminal phosphate cyclase-like protein isoform b [Homo s      | 2  | 3   | metabolic process                  | 0.964 | 0.497 | 0.548 |
| 158261 | unnamed protein product [Homo sapiens]                                | 13 | 277 | lic process; cellular homeostasis  | 1.279 | 0.496 | 0.536 |
| 221043 | unnamed protein product [Homo sapiens]                                | 4  | 13  | response to stimulus; cell death   | 0.931 | 0.495 | 0.488 |
| 343652 | hypothetical protein, partial [Homo sapiens]                          | 3  | 8   | n; cellular component movement     | 0.796 | 0.484 | 0.464 |
| 400394 | unnamed protein product, partial [Homo sapiens]                       | 2  | 4   |                                    | 0.851 | 0.480 | 0.558 |
| 119600 | activated leukocyte cell adhesion molecule, isoform CRA_c [Homo       | 7  | 51  | omponent movement; cell growth     | 0.856 | 0.478 | 0.459 |
| 768045 | PREDICTED: acetyl-CoA carboxylase 1 isoform X5 [Homo sapiens]         | 35 | 125 | biogenesis; response to stimulus   | 1.052 | 0.477 | 0.487 |
| 544759 | biliverdin-IX beta reductase isozyme I {EC 1.3.1.24} [human, liver, R | 6  | 120 | metabolic process                  | 1.109 | 0.470 | 0.455 |
| 767913 | PREDICTED: lysophospholipid acyltransferase 2 isoform X4 [Homo        | 4  | 17  | metabolic process                  | 1.053 | 0.463 | 0.467 |
| 142786 | Chain C, Human Gm2 Activator Structure                                | 3  | 6   |                                    | 1.321 | 0.461 | 0.562 |
| 620877 | brain glycogen phosphorylase variant, partial [Homo sapiens]          | 29 | 204 | metabolic process                  | 1.202 | 0.457 | 0.483 |
| 383872 | CD63 antigen isoform D precursor [Homo sapiens]                       | 3  | 35  | movement; response to stimulus     | 1.275 | 0.455 | 0.443 |
| 450228 | sodium/potassium-transporting ATPase subunit beta-3 [Homo sap         | 4  | 10  | cell organization and biogenesis   | 1.136 | 0.455 | 0.542 |
| 119608 | carnitine acetyltransferase, isoform CRA_c [Homo sapiens]             | 14 | 49  | transport; metabolic process       | 1.077 | 0.451 | 0.438 |
| 119588 | protein tyrosine phosphatase, receptor type, J, isoform CRA_a [Ho     | 2  | 4   | al process; response to stimulus   | 1.126 | 0.449 | 0.434 |
| 520587 | protein kinase C delta-type [Homo sapiens]                            | 2  | 6   | e; cellular component movement     | 0.971 | 0.446 | 0.400 |
| 413277 | epidermal growth factor receptor isoform c precursor [Homo sapie      | 2  | 7   | l proliferation; defense response  | 0.786 | 0.445 | 0.473 |
| 182516 | ferritin light subunit, partial [Homo sapiens]                        | 3  | 7   | cell organization and biogenesis   | 0.957 | 0.445 | 0.463 |
| 460152 | Chain D, Human SdhNAD+ COMPLEX                                        | 15 | 181 | metabolic process                  | 1.171 | 0.440 | 0.458 |
| 158352 | sorbitol dehydrogenase                                                | 15 | 181 | metabolic process                  | 1.171 | 0.440 | 0.458 |
| 371832 | C20orf3 [Homo sapiens]                                                | 14 | 102 | metabolic process                  | 1.198 | 0.439 | 0.459 |

|        |                                                                     |     |      |                                    |       |       |       |
|--------|---------------------------------------------------------------------|-----|------|------------------------------------|-------|-------|-------|
| 189096 | Chain B, Human Liver Glycogen Phosphorylase (Tense State) In C      | 6   | 46   | metabolic process                  | 1.290 | 0.433 | 0.460 |
| 936782 | LLPL, LCAT-like lysophospholipase, partial [Homo sapiens]           | 2   | 4    | metabolic process                  | 0.979 | 0.433 | 0.445 |
| 768020 | PREDICTED: neural cell adhesion molecule 2 isoform X8 [Homo sa      | 2   | 3    |                                    | 0.877 | 0.431 | 0.473 |
| 119603 | spondin 2, extracellular matrix protein, isoform CRA_a [Homo sapi   | 2   | 3    | response; response to stimulus     | 0.856 | 0.430 | 0.477 |
| 620875 | ABCC4 protein variant, partial [Homo sapiens]                       | 3   | 7    | ; metabolic process; coagulation   | 1.055 | 0.430 | 0.431 |
| 586500 | Chain D, Structure Of Human Aldh4a1 Crystallized In Space Group     | 14  | 73   |                                    | 0.981 | 0.418 | 0.420 |
| 475833 | fatty acid desaturase 2 isoform 1 [Homo sapiens]                    | 12  | 54   | metabolic process; transport       | 1.041 | 0.414 | 0.442 |
| 140439 | FASN protein [Homo sapiens]                                         | 20  | 468  | al process; response to stimulus   | 1.139 | 0.413 | 0.394 |
| 330689 | Chain D, The Structure Of The Fully Closed Conformation Of Huma     | 20  | 168  | metabolic process                  | 1.061 | 0.404 | 0.461 |
| 119592 | angiotensin II receptor-associated protein, isoform CRA_d [Homo     | 2   | 6    | ; regulation of biological process | 0.872 | 0.388 | 0.414 |
| 119614 | transmembrane protein 106B, isoform CRA_c [Homo sapiens]            | 4   | 12   | cell organization and biogenesis   | 1.094 | 0.386 | 0.395 |
| 116642 | prolactin-induced protein, partial [Homo sapiens]                   | 2   | 4    | n of biological process; transport | 1.203 | 0.371 | 0.474 |
| 193787 | unnamed protein product [Homo sapiens]                              | 3   | 7    | oliferation; response to stimulus  | 1.062 | 0.370 | 0.418 |
| 767997 | PREDICTED: fatty acid synthase isoform X1 [Homo sapiens]            | 103 | 3124 | al process; response to stimulus   | 1.123 | 0.367 | 0.358 |
| 119567 | ribonuclease T2, isoform CRA_c [Homo sapiens]                       | 5   | 18   | metabolic process                  | 1.244 | 0.365 | 0.443 |
| 767973 | PREDICTED: putative phospholipase B-like 2 isoform X1 [Homo sa      | 3   | 9    | metabolic process                  | 0.837 | 0.362 | 0.342 |
| 189053 | unnamed protein product [Homo sapiens]                              | 15  | 52   | metabolic process                  | 0.947 | 0.361 | 0.338 |
| 119570 | stearoyl-CoA desaturase (delta-9-desaturase), isoform CRA_c [Hori   | 5   | 19   | metabolic process                  | 1.230 | 0.359 | 0.450 |
| 345313 | unnamed protein product [Homo sapiens]                              | 3   | 6    |                                    | 0.966 | 0.355 | 0.356 |
| 256032 | Chain B, Crystal Structure Of Phosphorylated Mimic Form Of Huma     | 7   | 24   | metabolic process                  | 1.045 | 0.348 | 0.382 |
| 104905 | encodes region of fatty acid synthase activity; FAS; multifunctiona | 70  | 2198 | al process; response to stimulus   | 1.105 | 0.343 | 0.335 |
| 645985 | Chain C, Human D-dt Complexed With Tartrate                         | 3   | 7    |                                    | 1.215 | 0.342 | 0.373 |
| 119619 | spermine synthase, isoform CRA_c [Homo sapiens]                     | 4   | 17   | metabolic process                  | 1.077 | 0.340 | 0.356 |
| 140421 | unnamed protein product [Homo sapiens]                              | 2   | 3    | ; regulation of biological process | 1.688 | 0.338 | 0.384 |
| 193785 | unnamed protein product [Homo sapiens]                              | 5   | 21   | metabolic process                  | 1.068 | 0.336 | 0.320 |
| 119627 | hCG2031650, isoform CRA_e [Homo sapiens]                            | 7   | 23   |                                    | 1.111 | 0.334 | 0.366 |
| 334359 | Chain B, Crystal Structure Of A Fragment Of Fkbp51 Comprising T     | 2   | 7    | metabolic process                  | 1.331 | 0.324 | 0.317 |
| 104339 | unnamed protein product [Homo sapiens]                              | 2   | 3    | al process; response to stimulus   | 1.266 | 0.322 | 0.315 |
| 929654 | KIAA0830 protein [Homo sapiens]                                     | 6   | 16   |                                    | 1.252 | 0.322 | 0.289 |
| 580185 | CLN3 protein [Homo sapiens]                                         | 2   | 3    | s; cellular component movement     | 0.959 | 0.320 | 0.513 |
| 119574 | ATP-binding cassette, sub-family C (CFTR/MRP), member 1, isofor     | 23  | 82   | ; transport; response to stimulus  | 1.029 | 0.319 | 0.314 |
| 158261 | unnamed protein product [Homo sapiens]                              | 7   | 20   | metabolic process; transport       | 1.194 | 0.316 | 0.343 |
| 767903 | PREDICTED: F-box only protein 6 isoform X1 [Homo sapiens]           | 3   | 6    | e to stimulus; metabolic process   | 0.972 | 0.316 | 0.339 |
| 400413 | unnamed protein product, partial [Homo sapiens]                     | 4   | 29   |                                    | 1.235 | 0.306 | 0.317 |
| 119616 | microtubule-associated protein 1B, isoform CRA_b [Homo sapiens]     | 6   | 17   | ovement; transport; cell growth    | 0.788 | 0.298 | 0.318 |
| 119616 | serine incorporator 5, isoform CRA_a [Homo sapiens]                 | 2   | 6    | lus; transport; defense response   | 0.816 | 0.294 | 0.291 |
| 767933 | PREDICTED: type II inositol 3,4-bisphosphate 4-phosphatase isof     | 3   | 5    | al process; response to stimulus   | 0.841 | 0.294 | 0.283 |
| 914685 | Chain A, Human Cyclophilin D Complexed With An Inhibitor At Ro      | 3   | 5    | metabolic process                  | 1.323 | 0.292 | 0.361 |
| 767922 | PREDICTED: leucine-rich repeats and immunoglobulin-like domain      | 2   | 3    |                                    | 0.801 | 0.291 | 0.325 |
| 119619 | tetraspanin 3, isoform CRA_a [Homo sapiens]                         | 3   | 10   | al process; response to stimulus   | 0.854 | 0.280 | 0.291 |



|        |                                                                    |    |     |                                    |       |       |       |
|--------|--------------------------------------------------------------------|----|-----|------------------------------------|-------|-------|-------|
| 179034 | androgen-receptor [Homo sapiens]                                   | 2  | 3   | cell organization and biogenesis   | 1.012 | 0.274 | 0.296 |
| 697351 | Chain C, Enoyl-acyl Carrier Protein-reductase Domain From Huma     | 15 | 408 |                                    | 1.255 | 0.274 | 0.278 |
| 158261 | unnamed protein product [Homo sapiens]                             | 2  | 2   | ; regulation of biological process | 0.948 | 0.258 | 0.290 |
| 119621 | apolipoprotein B (including Ag(x) antigen), isoform CRA_b [Homo    | 4  | 16  | s; cellular component movement     | 1.087 | 0.244 | 0.237 |
| 221046 | unnamed protein product [Homo sapiens]                             | 4  | 24  | cell organization and biogenesis   | 1.210 | 0.239 | 0.265 |
| 767900 | PREDICTED: inactive gamma-glutamyltranspeptidase 2 isoform X2      | 6  | 17  |                                    | 0.906 | 0.232 | 0.232 |
| 119624 | ELOVL family member 5, elongation of long chain fatty acids (FEN   | 2  | 10  | metabolic process                  | 0.917 | 0.193 | 0.190 |
| 221044 | unnamed protein product, partial [Homo sapiens]                    | 7  | 17  | cell organization and biogenesis   | 1.034 | 0.185 | 0.224 |
| 134104 | Chain B, Crystal Structure Of Human Mu_crystallin At 2.6 Angstrom  | 3  | 7   | metabolic process                  | 1.419 | 0.184 | 0.206 |
| 768021 | PREDICTED: transmembrane protease serine 2 isoform X4 [Homo        | 4  | 12  | ; regulation of biological process | 1.073 | 0.182 | 0.177 |
| 321341 | unnamed protein product [Homo sapiens]                             | 2  | 10  |                                    | 1.040 | 0.171 | 0.202 |
| 556695 | Chain A, Structural Analysis Of Nephilysin With Various Specific A | 12 | 44  | metabolic process                  | 1.300 | 0.118 | 0.125 |
